# Supplementary material
Source: PubMed Central journal article supplement (PMC1347522)
Supplement: nar_34_suppl-1_D432__1.pdf [file nar_34_suppl-1_D432__1.pdf]

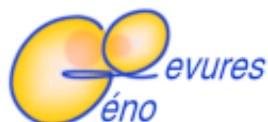

# CAGL0K04037g [Help!](#)

[About](#)

[Families](#)
[Download](#)
[Top](#)
[Blast](#)
[Publications](#)
[CBiB](#)

## CAGL0K04037g

tr|Q9P8N8 *Candida glabrata*  
1, 3-beta-glucan synthase,  
identified start

*Candida glabrata* Complete  
CDS.

ORF from

[Cagl0K:372546..378239](#) sense

(p)

Predicted protein is 1897 aa

Synonyms:

CAGL0K04037g|CAGL-

IPF2142|CAGL-CDS0043.1

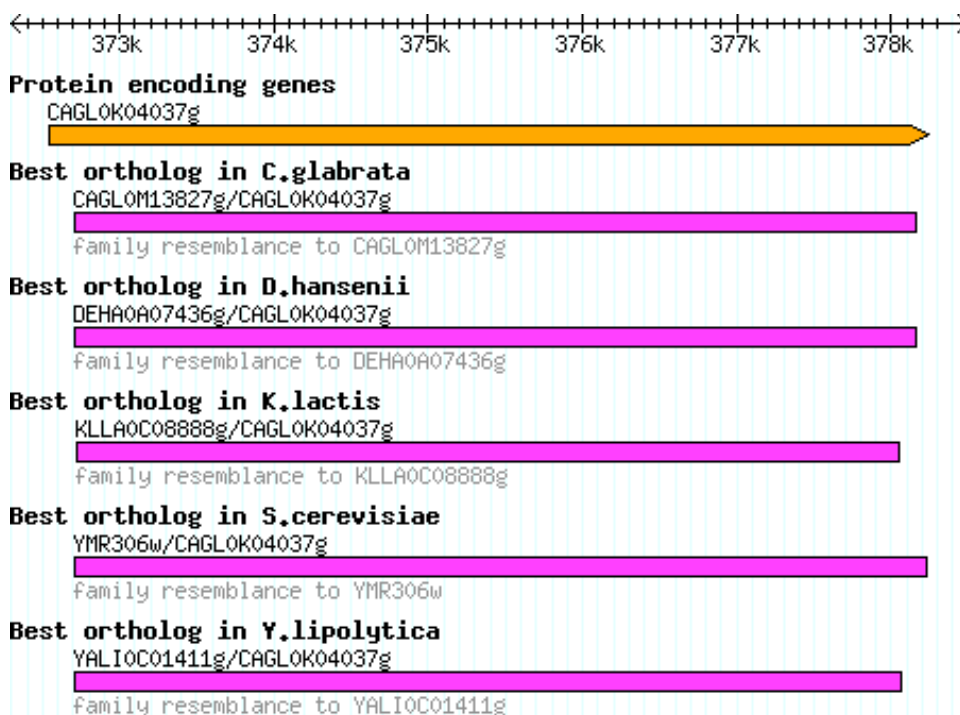

## Theoretical

Molecular weight: 217.6 kDa

Avg residue weight: 114.7 Da

Isoelectric point: 7.8

Charge: 23.5

(InterPro domains cartoon)

## Protein family

Family [GLR.23](#) sckdy: 13 proteins (3 3 3 2 2)

## Results

|                                     |                                     |
|-------------------------------------|-------------------------------------|
| <a href="#">S.cerevisiae blastp</a> | <a href="#">Uniprot blastp</a>      |
| <a href="#">C.albicans blastp</a>   | <a href="#">N.crassa blastp</a>     |
| <a href="#">C.glabrata blastp</a>   | <a href="#">K.lactis blastp</a>     |
| <a href="#">D.hansenii blastp</a>   | <a href="#">Y.lipolytica blastp</a> |

## CDS translation product

>gnl|GLV|CAGL0K04037g Translation product.

MSYDQGGNGNWQNTDPNGNYYYNGAENNEFYDQDYASQOPEQOQGGEGYDEYGQPNYNY  
MNDPQOQGOMPOQOQPGGYENDGYYSYNNQMNAVGNGGLGPDQTNFSDFSYSGPPPFQNN  
QANYTPSQLSYSNNGMGSNGMNSGSSTPVYGNYPNAIAMTLPNDPYPAWTADPQSPVS  
IEQIEDVFIDLTKNFKGFQORDSMRNIFDLFMTLLDSRTSRMSPDQALLSVHADYIGGDTAN  
YKKWYFAAQOLDMDDEVGFRNMNLGKLSRKARKAKKKKKAMEEANPEDAAEVLNKIEGDN  
SLEASDFRWKTKMMLTPIERVROVALYMLIWGEANQVRFTSECLCFIYKCADSYLESPL  
CQORTEPIPEGDYLNRVITPIYQFIRNOVYEIVDGRYVKREKDHNKIIGYDDVNQLFWYP  
EGITKIVLEDGTKLTDIPSEERYLRLGEVAWNVDFFKTYKETRTWLHLVTNFNRIWIMHV  
SVYWMYVAYNSPTFYTHNYQQLVNNQPVPAWRWASAALAGTVASAIQLFATVCEWVFPVPR  
KWAGAQLSRRFVFLCGILGVNLGPLIFVFAYEKDQVQSKAGHAAVAVTFPIAVATVLFV  
SIMPLGGLFTSYMOKSSRRYVASQTFATASFAPLQGLDRWLSYLVVWTVFAAKYSESYFFL  
ILSLRDPDIRILSTTTMRCCTGEYWWGSKLGRHQSIVLGFMIATDFILFFLDTYLWYIVVN  
TVFVSGKSFYLGISILTPWRNIFTRLPKRIYSKILATDMEIKYKPKVLSIQIWNAIIS  
MYREHLLAIDHVQKLLYHQVPEIEGKRTLRAPTFFVSDQDNNFETEFFPRNSEAERRIS  
FFAQLSLATPMPPEPLVDNMPFTVLTTPHYSERILLSLREIIREDDQFSRVTLLEYLKLQHL  
PVEWECFVKDTKILAEETAAYENEETQDPEKSDALKTQIDDLPFYICIGFKSAAPEYTLRT  
RIWASLRSQTLRYTVSGFMNYARAIKLLYRVENPEIVQMFGGNAEGLERELEKMARRKFK  
FLVSMQRLAKFKPHELENTEFLLRAYPDLQIAYLDEEPPLNEGEEPRISALIDGHCEML  
ENGRRRPKFRVQLSGNPILGDGKSDNQNHALIFYRGEYIQLIDANQDNYLEECLKIRSVL  
AEFEELNAEPVYPYTPGVKYEDQKTNHPVAIVGAREYIFSENSGVLDVAAGKEQTFGTL  
FARTLAQIGGKLLHYGHPDFINATFMTTRSGLSKAQGLHLNEDIYAGMNALLRGGRIKHC  
EYYQCGKRDGLFGFTILNFTTKIAGAGMGEQMLSREYYLGTQLPVDRFLTFYYAHPGFHL  
NNLFIQLSLQFMLTLVNLHALAHESILCIYDRNKPKTDVLYPIGCYNFSPAIDWIRRYT  
LSIFIVFIAFVPIVVQELERGLWKTQRFRRHILSLSPMFEVFAQIYSAALLSDMTV  
GGARYISTGRGFATSRIPFSILYSRFASSAIYMGARSMLMLLFGTVAHWQAPLLWFWASL  
SALLFSPFIFNPHQFSWEDFFLDYRDYIRWLSRGNNKYHKNSWIGYVRMARSRITGFKRK  
LIGDDSEKAAGDANRAHRTNLILAELIPTAINAGSCFIGFTFINAQTVKATDDDRVNSV  
LRVVLCTLGPIAVDVGVLFCLGMSCCSGPLFGMCKKTGAVMAAAVAHGVSVVIHIGFFI  
VMWVLEGFNFTRMLVGVATVIQCQRFIFQLMTILLLTREFKNDHANTAFWTGKWYGSFG  
YMAWTQPMRELTAKVIEMSEFAADFVLGHVILFAQFPVLCIPAIDKFHSIMLFWLKPSRH  
IRPPIYSLKQSRRLKRMVKRYLTLYIIIFLVFAGAIVGPAAVAASHVPQDIGHTLTGPFHN  
IVQPRNKSNNDTGLQISTYSNHYYTHTPSLKTWSTIK

## Predicted mRNA for coding sequence

>gnl|GLV|CAGL0K04037g tr|Q9P8N8 Candida glabrata 1, 3-beta-glucan synthase,  
identified start [Candida glabrata] Complete CDS.

AUGUCUUACGAUCAAGGUGGUAUUGGCAAUUGGCAGAACACCGAUCCCAAUGGUAACUAU  
UACUACAAGGGGCGGAGAACAAACGAAUUCUAUGAUCAGGAUUAUGCUUCUACAACAACCA  
GAACAACAACAAGGUGGUGAAGGUUACUACGAUGAGUACGGACAACCCAAUAUAAUUAAC  
AUGAACGACCCACAGCAAGGUCAAAUGCCACAACAACAACCUGGUGGUUAUGAGAACGAC  
GGCUACUACGACUCGUACUAUAACAACCAGAUGAACGCUGGUGUUGGCAAUGGGUUGGGA  
CCUGACCAGACUAAUUUUUCAGAUUUUAGCAGCUACGGACCACCUCAUUUCAAAAUAAC  
CAAGCUAAUUUAACACCAUCCCAACUAAGUUAUAGCAACAAUGGGGAUGGGCAGCAACGGU  
AUGAAUAUGUCUGGUUCGUCAACUCCAGUAUACGGUAACUACGAUCCGAACGCUAUUGCG  
AUGACAUUACCAACGACCCAUACCCAGCUUGGACCGCUGAUCCACAAAGUCCCGUUUC  
AUUGAACAAUUCGAAGACGUCUUCUACGAUCUAACCAACAAAUUUGGUUCCAAAGAGAC  
UCUAUGAGAAACAUCUUCGACCUGUUUAUGACUUUAUUGGACUCUAGAACAUCAGAAUG  
UCUCCAGACCAAGCAUUGCUAUCUGUCCACGCUGAUUAUAUUGGUGGUGACACUGCUAAC  
UACAAGAAAUGGUAAUUCGCAGCUCAGCUUGAUUUGGAUGAUGAAGUUGGUUUCAGAAAC  
AUGAAUUGGGUAAGUUAUCAAGAAAAGCAAGGAAAGCUAAGAAGAAGAACAACAAAAGCA  
AUGGAAGAGGCCAACCCUGAAGACGCUGCUGAAGUGCUAAUAAAAUCGAAGGUGAUAAAC  
UCUCUUGAAGCUUCUGACUUCAGAUUGGAAGACUAAGAUGAACAUAGCUAACUCCUAUUGAA  
AGGGUUCGUAAGUGGCCUUUAUCAUGUUAUUCUGGGGUGAAGCUAACCAAGUUGAUUC  
ACUUCUGAUGUCUAUGUUUAUUAUUAUUAUUGUCUUCUGACUACCUAGAAUCACCAUUA  
UGCCAACAGAGAACAGAGCCAAUCCAGAAAGGUGAUUAUUAUUAUUAUAGAGUCAUCACUCCA  
AUUUUAUCAUUUAUUCAGAAACCAGGUCUAUGAAUUGUCGAUGGACGUUAUGUCAACCGU  
GAAAAGGACCAUAACAAGAUUAUUGGUUAUGAUGAUGUCAACUGUUUUGGUACCCA  
GAAGGUUAUCACUAAGAUUGUAUUGGAAGAUGGUACUAAACUAACUGAUUAUCCAAAGCGAG  
GAACGUUAUCUUAAGACUUGGGGAAGUGGUUUGGAACGAUGUCUUCUUUAAGACAUACAAG

GAAACACGUACUUGGUUACAUCUUGUGACCAAUUUCAUUCGUUUUUGGAUUAUGCACGUU  
UCCGUCUACUGGAUGUAUGUUGCUUAUAACUCUCCUACUUUCUACACUCACAACUAUCAA  
CAACUGGUAACAACUACACUCCUGUCCUGCUUAUAGAUGGGCAAGUGCCGCCUUGGCUGGU  
ACAGUGGCUAGUGCAAUCCAGUUGUUUGCAACUGUUUGUGAAUGGGUUCGUUCCAAGG  
AAAUGGGCUGGUGCUACAACAUUUUAUCUCGUAGGUUUUGGUUUUAUGUGGUUAUCCUAGGU  
GUUAAUCUUGGUCCUUAAUUUUUGUCUUUGCUUAUGAAAAGGACACUGUUCAAUCGAAG  
GCUGGUCAUGCUGUAGCAGCUGUGACAUUUUUCAUUGCUGUGGCCACUGUUUUUAUUCUUC  
UCGAUUAUGCCAUUAGGUGGUCUUUUACCCUCAUUAUGCAAAAAUCAAGUAGAAGAUUAU  
GUUGCUUCUCAGACUUUCACCGCAUCUUUUGCCCAUUACAAGGUUUGGAUAGAUGGUUA  
UCUUAUUUAGUUUGGUUACAGUUUUUGCUGCCAAAUACUCUGAAUCGUACUUCUUCUUG  
AUUUUGUCUCUAAGAGACCCUAUCAGAAUUUUUAUCAACUACUACCAUGGAGAUGUACUGGU  
GAGUAUUGGUGGGGUUCAAAGUUUAUGUAGACAUCAAUCCGAAGAUUGUUUAGGUUUAUG  
AUUGCUCACAGAUUUCAUUUUGUUCUCCUUGAUACUUAUUUGGUACAUUGUUGUCAAC  
ACUGUCUUCUCUGUUGGUAUUUCCUUCUAUCUAGGUUUUCCAUUCUUAACUCCUUGGAGA  
AAUUAUCUUUAACAAGAUUACCAAAGAGAAUUUACUCAAAAGAUUUUGGCCACAACUGAUUG  
GAGAUUAAAUAUAAACCAAAGGUUCUAUUCUCUCAAAUUUGGAAUGCAAUUUAUUUUUCC  
AUGUACAGAGAACAUUUACUUGCUAUCGACCAUGUUCAGAAACUGUUUAUACCAUCAAGU  
CCAUCUGAAAUUGAAGGUAAAAGAACUCUAAGAGCUCCAACGUUCUUGUAUCUCAGGAU  
GAUAAACAUUUUUGAAACUGAGUUUUUCCAAAGAAACUCUGAAGCUGAACGUCGUAUCUCA  
UUCUUUGCCCAAUCAUUGGCUACCCCAAUGCCAGAACCAUUAACAGUUGACAACAUGCCA  
ACUUUUACCGUCUUGACUCCACACUAUUCUGAAAGAAUUAUUGCUUUUCUAAGAGAAAUC  
AUCAGAGAAGAUGAUAUUUUCAAGAGUCACUCUAUUAGAAUUAUUUGAAACAUAUUGCAU  
CCUGUUGAAUGGGAAUGUUUUUUAAGGAUACCAAGAUUCUGGCAGAAAGAACAGCCGCU  
UAUGAAAUGAGGAGACUCAGGAUCCAGAGAAAUCUGACGCUUUUGAAAACUCAAAUUGAU  
GAUCUUCUUUCUACUGUAUUGGUUUCAAGUCUGCUGCUCAGAAUACACUUUACGUACA  
CGUAUUUGGGCAUCGUUGAGAUCCCAAACCUUGUACCGUACUGUUUCUGUUUUUAUGAAC  
UACGCUAGAGCGAUUAAAUUGCUAUUACCGUGUCGAAAACCCAGAGAUUGUCAAUUGUUU  
GGUGGCAUUGCUGAAGGUCUUGAGAGAGAAUUGGAGAAAUGGCUAGAAGAAAGUUUAAG  
UUUUUGGUUUCAAUGCAAAGAUUGGCUAAGUUUAAGCCACAUGAAUUAAGAAAUAUCUGAA  
UUCUUGUUAAGAGCUUACCCUGAUUUUACAUAUUGCUUACUUGGAUGAAGAACCUCUUUG  
AACGAGGGAGAAGAACCAAGAAUUUAUUCUGCCUUGAUUGACGGUCACUGUGAAAUGUUG  
GAAAACGGUCGGAGACGUCCAAAUAUCAGAGUUCAAUUAUCUGGUAAACCUAUUCUUGGU  
GAUGGUAAAUCUGAUAAUCAAAACCAUGCUUUUGAUUUUCUACAGAGGUGAAUACAUAUCA  
UUAUUUGAUGCUAACCAAGACAACUAUUUGGAAGAAUGUUUGAAGAUUAGAUCGUUUUUA  
GCCGAAUUUGAGGAAUUAAAUGCCGAACCCGUCUACCAUACACUCCUGGUGUUAAAUAU  
GAAGACCAGAAGACUAUAUCCAGUCGCAAUUGUUGGUGCUAGAGAAUUAUUUUUCUCC  
GAAAACUCUGGUGUCUUGGUGAUGUCGCCGUCUGUAAGGAACAGACUUUUGGUACAUUG  
UUUGCUCGUACAUUGGCUCAAAUUGGUGGUAACUGCAUUUAUGGUCACCCGGAUUUCAUC  
AAUGCUACGUUUUAUGACAACAAGAAGUGGUCUAUCCAAGGCUCAAAAAGGUUUAUAUUUG  
AACGAAGAUUUUAACGCCGUAUGAAUGCCCUAUUACGUGGUGGUCGUUUUAAGCACUGU  
GAAUUAUUAUCAAUGUGGUAAGGUAGAGAUUUAGGUUUUGGUACAUAUUUGAAUUUCACA  
ACUAAGAUAUGGUGCAGGUUAGGGUGAACAAGAUUUUGUCCCGUGAGUACUACUUAUUAGGU  
ACACAUAUGCCCGUAGACC GUUUUCUUGACUUUCUACUUAUGCGCAUCCUGGUUUCCAUUUG  
AAUAACUUGUUAUUAUCAAUUGUCUUUGCAAUUGUUUAUGCUAACUUUGGUCAAUUUGCAU  
GCGCUUGCCCACGAAUCCAUUCUUUGUAUUUACGAUAGAAUAAGCCUAAGACUGAUGUC  
UUGUAUCCUAUCGGUUGUUAACAACUUCUACACCAGCCAUUGAUUGGAUCAGACGUUAUACA  
UUGUCCAUUUUCAUUGUUUCUGGAUUGCCUUUGUUCUUAUUGUUGUUAAGAGUUGAUU  
GAACGUGGUCUAUGGAAGGCUACUCAAAAGAUUUUCCGUCACAUUCUAUCUCUAUCCCCA  
AUGUUUGAAGUUUUUGCUGGUCAAUUUAUUCUGCUGCUCUAUUGAGUGACAUGACUGUG  
GGUGGUGCUCGUUAUAUAUCCACCGGUCGUGGUUUUGCAACAUCCCGUAUUCUUAUCUA  
AUUUUAUACUCCAGAUUUGCCAGCUCUGCCAUUUAUUGGGGGCCAGAUCUAUGCUGAUG  
UUAUUUAUUCGGUACAGUGGCACAUUGGCAAGCUCUUAUACUAGGUUCUGGGCAUCUCUA  
UCUGCUUUACUGUUCUCUCCAUAUCAUUAUUAAUCCACAUCAUUUUUCCUGGGAAGAUUC  
UUCUUGGACUACAGAGACUAUAUUAAGAUGGUUAUCAAGAGGUAACAUAAGUACCACAAA  
AAUUCUUGGAUUGGCUACGUAAGAAUGGCAAGAUCACGUAUUACAGGUUCAAACGUAAG  
UUGAUUGGUGAUGAUUCUGAAAAGGCUGCAGGUGAUGCUAACAGAGCUCUAAGAACAAC  
UUAUAUACUAGCUGAAUUGAUUCCAACUGCAAUUUAUGCAGGUAGUUGUUUAUUGGUUUU  
ACCUCUAUUAACGCUCAAAACCGGUGUUAAGGCCACC GAUGAUGACAGAGUCAACUCUGUU  
CUAAGAGUUGUCUUGUACACUUGGUCAAUCGCUGUUGAUGUUGGUGUAUUUAUUUUUC  
UGUUUGGUAUGUCCUGUUGUUCUGGUCAAUUGUUUGGUAUGUGCUGUAAGAAGACAGGU  
GCUGUUAUGGCGGCGGUUGCACACGGUGUCUCAGUUGUGAUUCAUAUUGGUUUCUUAU

GUAAUGUGGGUUCUAGAAGGUUUUAACUUCACUAGAAUGCUGGUUGGUGUUGCCACAGUU  
 AUCCAAUGUCAAAAGAUUUUUUCCAAUUAUUGACAAUUUUACUAUUGACCAGAGAAUUC  
 AAGAAUGACCAUGCUAACACGGCUUUCUGGACAGGUAAGUGGUUAUGGUUCUGGCUUUGGU  
 UACAUGGCUUGGACUCAACCAAUGAGAGAAUUGACUGCAAAGGUUAUAGAGAUGUCUGAA  
 UUUGCAGCUGAUUUUGUUCUUGGUCAUGUCAUCUUAUUUGCCAAUUCUUGUGCUUUGU  
 AUUCCUGCCAUUGAUAAAUCCACUCAUCAUGCUGUUCUGGUUGAAACCAUCUCGUCAU  
 AUUCGCCACCAAUUUAUCAUUAAGCAAUCCCGUUUAAGAAAGAGAAUGGUGAAGAGA  
 UACUUGACUCUUACAUCAUUAUUUCUUGGUGUUUGCAGGCGCCAUAUGUUGGCCAGCU  
 GUCGCCGCUAGCCAUGUGCCACAGGAUAUUGGCCAUACAUAUGACUGGCCCAUCCAUAAAC  
 AUUGUUAACCUAGAAACAAGAGUAACAAUGAUACUGGUUUGCAAAUUCGACAUAUAGU  
 AAUCAUACUACACACAUACGCCAUCUCUAAAAGACCUGGUCCACUAUAAAAUAA

## CDS chromosomal neighborhood

>gnl |GLV |CAGL0K04037g -500,+200 neighborhood

GTTTCTGATCTCTTCCGTCCTCTCTGTTTTGGCGGCTCCAGACACACTCCCCTTTATCT  
 TCCTAGCCGCCATTCTCTTCTACCTTTATTTGGTCTCTTTTCTAACTTTGAGATCTGGG  
 AACTAAGCGCCGAGGTTCCGTATTATCCGTTGAAAATTGTACGAGCCCTCACTAGACATT  
 CACTTTGTACAAGAATTAAGGACATCATACAGCGGTAAACTTTTTACAACACTACAAGTC  
 TTTTGTCTTTCTTCTCATCGAAGAAAACAGGAATAGACACAAAAAAGAGAGTAAGTG  
 TTTTAGATTTTCTTTTCATAAAATAAAGGAAGATTAACAAGCTGGGGAAAATAACTGC  
 CTAACTTCCCCTTGTGCTGACAATTCGCTTAAAGTAAAGAACAAGGTATCAAGGATTTA  
 GGAAGAAATTCTTTTACTATCCCAAGTCTCTATCAGCCAATAAAGGAATAAGAACAAGAC  
 AGAAAAAGAAAATTCCAACC**ATGTCCTTACGATCAAGGTGGTAATGGCAATTGGCAGAACA**  
**CCGATCCCAATGGTAACTATTACTACAATGGGGCCGAGAACAACGAATTCATGATCAGG**  
**ATTATGCTTCTCAACAACCAGAACAACAACAAGGTGGTGAAGGTTACTACGATGAGTACG**  
**GACAACCCAACATAATTACATGAACGACCCACAGCAAGGTCAAATGCCACAACAACAAC**  
**CTGGTGGTTATGAGAACGACGGCTACTACGACTCGTACTATAACAACCAGATGAACGCTG**  
**GTGTTGGCAATGGGTTGGGACCTGACCAGACTAATTTTTTCAGATTTTAGCAGCTACGGAC**  
**CACCTCCATTTCAAATAACCAAGCTAATTATACACCATCCCAACTAAGTTATAGCAACA**  
**ATGGGATGGGCAGCAACGGTATGAATATGTCTGGTTCGTCAACTCCAGTATACGGTAACT**  
**ACGATCCGAACGCTATTGCGATGACATTACCAAACGACCCATACCCAGCTTGGACCGCTG**  
**ATCCACAAGTCCCGTTTCCATTGAACAAATCGAAGACGTCTTCATCGATCTAACCAACA**  
**AATTTGGTTTTCAAAGAGACTCTATGAGAAACATCTTCGACCTGTTTATGACTTTATTGG**  
**ACTCTAGAACATCCAGAATGTCTCCAGACCAAGCATTTGCTATCTGTCCACGCTGATTATA**  
**TTGGTGGTGACTGCTAACTACAAGAAATGGTATTTTCGCAGCTCAGCTTGATATGGATG**  
**ATGAAGTTGGTTTTCAGAAACATGAATTTGGGTAAGTTATCAAGAAAAGCAAGGAAAGCTA**  
**AGAAGAAGAACAAGAAAGCAATGGAAGAGGCCAACCCCTGAAGACGCTGCTGAAGTGCTTA**  
**ATAAAATCGAAGGTGATAACTCTCTTGAAGCTTCTGACTTCAGATGGAAGACTAAGATGA**  
**ACATGCTAACTCCTATTGAAAGGGTTCGTCAAGTGGCCCTTTACATGTTAATCTGGGGTG**  
**AAGCTAACCAAGTTAGATTCACCTTCTGAATGTCTATGTTTCATTTACAAATGTGCTTCTG**  
**ACTACCTAGAATCACCATTATGCCAACAGAGAACAGAGCCAATCCAGAAGGTGATTATC**  
**TAAATAGAGTCATCACTCCAATTTATCAATTTATCAGAAACCAGGTCTATGAAATTGTG**  
**ATGGACGTTATGTCAAACGTGAAAAGGACCATAACAAGATTATTGGTTATGATGATGTCA**  
**ATCAACTGTTTTGGTACCCAGAAGGTATCACTAAGATTGTATTGGAAGATGGTACTAAAC**  
**TAACTGATATTCGAAGCGAGGAACGTTACTTAAAGACTTGGGGAAAGTGGCTTGGAACGATG**  
**TCTTCTTAAAGACATACAAGGAAACACGTACTTGGTTACATCTTGTGACCAATTTCAATC**  
**GTATTTGGATTATGCACGTTTCCGTCTACTGGATGTATGTTGCTTATAACTCTCCTACTT**  
**TCTACACTACAACATCAACAACCTGGTAAACAATCAACCTGTCCCTGCTTATAGATGGG**  
**CAAGTGCCGCCTTGGCTGGTACAGTGGCTAGTGCAATCCAGTTGTTTGAACCTGTTTGTG**  
**AATGGTGGTTCGTTCCAAGGAAATGGGCTGGTGTCAACATTTATCTCGTAGGTTTTGGT**  
**TTTTATGTGGTATCCTAGGTGTTAATCTTGGTCCTTAATTTTTGTCTTTGCTTATGAAA**  
**AGGACACTGTTCAATCGAAGGCTGGTCATGCTGTAGCAGCTGTGACATTTTTCATTGCTG**  
**TGGCCACTGTTTTATTCTTCTCGATTATGCCATTAGGTGGTCTTTTCACCTCATATATGC**  
**AAAAATCAAGTAGAAGATATGTTGCTTCTCAGACTTTCACCGCATCTTTTGCCCCATTAC**  
**AAGGTTGGATAGATGGTTATCTTATTTAGTTTGGGTTACAGTTTTTGTGCTGCCAAACT**  
**CTGAATCGTACTTCTTCTGATTTTGTCTCTAAGAGACCCTATCAGAAATTTTATCAACTA**  
**CTACCATGAGATGTACTGGTGAGTATTGGTGGGGTTCAAAGTTATGTAGACATCAATCGA**  
**AGATTGTTTTAGGTTTTCATGATTGCTACAGATTTCAATTTGTTCTTCTTGTGATACTTATT**  
**TGTGGTACATTGTTGTCAACACTGTCTTCTCTGTGGTAAATCCTTCTATCTAGGTATTT**

CCATCTTAACTCCTTGGAGAAATATCTTTACAAGATTACCAAAGAGAATTTACTCAAAGA  
TTTTGGCCACAACCTGATATGGAGATTAATATAAAACCAAAGGTTCTAATCTCTCAAATTT  
GGAATGCAATTATTATTTCCATGTACAGAGAACATTTACTTGCTATCGACCATGTTTCA  
AACTGTTATACCATCAAGTTCATCTGAAATTGAAGGTAAAAGAACTCTAAGAGCTCCAA  
CGTCTTTGTATCTCAGGATGATAACAATTTTGAAACTGAGTTTTTCCCAAGAAACTCTG  
AAGCTGAACGTCGTATCTCATTCTTTGCCCAATCATTTGGCTACCCCAATGCCAGAACCAT  
TACCAGTTGACAACATGCCAATTTTACCGTCTTGACTCCACACTATTCTGAAAGAATAT  
TGCTTCTCTAAGAGAAATCATCAGAGAAGATGATCAATTTTCAAGAGTCACTCTATTAG  
AATATTTGAAACAATTGCATCCTGTTGAATGGGAATGTTTTGTTAAGGATACCAAGATTC  
TGGCAGAAGAAACAGCCGCTTATGAAAATGAGGAGACTCAGGATCCAGAGAAATCTGACG  
CTTTGAAAACCTCAAATTGATGATCTTCTTTTCTACTGTATTGGTTTCAAGTCTGTCTC  
CAGAATACACTTTACGTACACGTATTTGGGCATCGTTGAGATCCCAAACCTTGTACCGTA  
CTGTTCTGTTTTATGAACTACGCTAGAGCGATTAAATTGCTATAACCGTGTGAAAACC  
CAGAGATTGTTCAAATGTTTGGTGGCAATGCTGAAGGTCTTGAGAGAGAATTGGAGAAAA  
TGGCTAGAAGAAAGTTTAAAGTTTTTGGTTTTCAATGCAAAGATTGGCTAAGTTTAAAGCCAC  
ATGAATTAGAAAATACTGAATTCCTGTTAAGAGCTTACCCTGATTTACAAATTGCTTACT  
TGGATGAAGAACCTCCTTTGAACGAGGGAGAAGAACCAGAATTTATTCTGCCTTGATTG  
ACGGTCACTGTGAAATGTTGAAAACCGTGGAGACGTCCAAAATTCAGAGTTCAATTAT  
CTGGTAACCTATTCTTGGTGATGGTAAATCTGATAATCAAACCATGCTTTGATTTTCT  
ACAGAGGTGAATAACATTAATTAATTGATGCTAACCAAGACAACATTTGGAAGAATGTT  
TGAAGATTAGATCCGTTTTAGCCGAATTTGAGGAATTAATGCCGAACCCGCTTACCCAT  
ACACTCCTGGTGTAAATATGAAGACCAGAAGACTAATCATCCAGTCGAATTGTTGGTG  
CTAGAGAAATATATTTTCTCCGAAAACCTCTGGTGTGCTTGGTGATGTCGCCGCTGGTAAGG  
AACAGACTTTTTGGTACATTTGTTGCTCGTACATTGGCTCAAATTTGGTGGTAAACTGCATT  
ATGGTCACCCGGATTTTCATCAATGCTACGTTTATGACAACAAGAAGTGGTCTATCCAAGG  
CTCAAAGGGTTTTACATTTGAACGAAGATATTTACGCCGGTATGAATGCCCTATTACGTG  
GTGGTCTGTTAAGCACTGTGAATATTATCAATGTGGTAAAGGTAGAGATTTAGGTTTTG  
GTACAATTTTGAATTTCAACATAAGATTGGTGCAGGTATGGGTGAACAAATGTTGTCCC  
GTGAGTACTACTATTTAGGTACACAATTGCCCGTAGACCGTTTTCTTGACTTTCTACTATG  
CGCATCCTGGTTTTCCATTTGAATAACTTGTTCATTCAATTGTCTTTGCAAATGTTTATGC  
TAACTTTGGTCAATTTGCATGCGCTTGGCCACGAATCCATTCTTTGTATTTACGATAGAA  
ATAAGCCTAAGACTGATGCTTGTATCCTATCGGTTGTTACAACCTTCTACCAGCCATTG  
ATTGGATCAGACGTTATACATTTGCTCATTTTTCAATGTTTTTCTGGATTGCCTTTTGTTCTA  
TTGTTGTTCAAGAGTTGATTGAACGTGGTCTATGGAAGGCTACTCAAAGATTTTTCCGTC  
ACATTTCTATCTCTATCCCAATGTTTGAAGTTTTTGTCTGGTCAAATTTATTCTGCTGCTC  
TATTGAGTGACATGACTGTGGTGGTGTCTCGTTATATATCCACCGGTCGTGGTTTTGCAA  
CATCCCGTATTCCATTCTCAATTTTATACTCCAGATTTGCCAGCTCTGCCATTTATATGG  
GGGCCAGATCTATGCTGATGTTATTATTCGGTACAGTGGCACATTGGCAAGCTCCATTAC  
TATGGTTCGGGCATCTCTATCTGCTTTACTGTTCTCTCCATTCAATTTAATCCACATC  
AATTTTCTGGGAAGATTTCTTCTTGGACTACAGAGACTATATTAGATGGTTATCAAGAG  
GTAACAATAAGTACCACAAAATTTCTTGGATTGGCTACGTAAGAATGGCAAGATCACGTA  
TTACAGTTTTCAAACGTAAGTTGATTGGTGATGATTCTGAAAAGGCTGCAGGTGATGCTA  
ACAGAGCTCATAGAACAAACTTAATACTAGCTGAATTGATTCCAACCTGCAATTAATGCAG  
GTAGTTGTTTTCAATGGTTTTTACCTTCAATTAACGCTCAAACCGGTGTTAAGGCCACCGATG  
ATGACAGAGTCAACTCTGTTCTAAGAGTTGTCTTGTGTACACTTGGTCCAATCGCTGTTG  
ATGTTGGTGTATTATTTTTCTGTTTGGGTATGTCCTGTTGTTCTGGTCCATTGTTTGGTA  
TGTGCTGTAAGAAGACAGGTGCTGTTATGGCGGCGGTTGCACACGGTGTCTCAGTTGTGA  
TTCATATTGGTTTTCTTCAATGTAATGTGGGTTCTAGAAGGTTTTAACTTCACTAGAATGC  
TGGTTGGTGTGGCACAGTTATCCAATGTCAAAGATTTATTTTTCCAATTAATGACAATTT  
TACTATTGACCAGAGAATTCAGAATGACCATGCTAACACGGCTTTCTGGACAGGTAAGT  
GGTATGGTCTGGCTTTGGTTACATGGCTTGGACTCAACCAATGAGAGAATTGACTGCAA  
AGGTTATAGAGATGTCTGAATTTGCAGCTGATTTTGTCTTGGTCAATGTCATCTTATTTG  
CCCAATTCCTGTGCTTTGTATTCTGCCATTGATAAATTCACCTCAATCATGCTGTTCT  
GGTTGAAACCATCTCGTCATATTGCCCCACCAATTTATTCATTAAGCAATCCCGTTTTAA  
GAAAAGAGAATGGTGAAGAGATACTTGACTCTTTACATCATTATTTTTCTTGGTGTGTTGAG  
GCGCCATTGTTGGCCAGCTGTCGCCGCTAGCCATGTGCCACAGGATATTGGCCATACAT  
TGACTGGCCATTCCATAACATTTGTTCAACCTAGAAAACAAGAGTAAACAATGATACTGGTT  
TGCAAATTCGACATATAGTAATCATTACTACACACATACGCCATCTCTAAAGACCTGGT  
CCACTATAAAA**TAA**AGAGGCAATAGATAATCCCCTAATTGAGTATGATTTTCAAGAATTT  
TTCTAATTAGGAATTAGCATCATTACTCTTTCAACTATCATTTTATCCTTATAAATGTCA  
ATCATTATTTTTATTTTTATCTATTTGTTTTAATTTGTTACGGAAAGAGACTATTTATTG

CGATGGTAACAATAACAGTCTATATTTTTATCTT

---

[Center for Bioinformatics · Bordeaux](#)  
[mail Webmaster@cbi.labri.fr](mailto:Webmaster@cbi.labri.fr)

URL: <http://cbi.labri.fr/Genolevures/elt/CAGL/CAGL0K04037g>  
Update: Monday, 1 August 2005
