# Supplementary material
Source: PubMed Central journal article supplement (PMC1347522)
Supplement: nar_34_suppl-1_D432__3.pdf [file nar_34_suppl-1_D432__3.pdf]

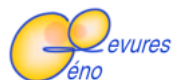

## Starch and sucrose metabolism

([link to KEGG](#))

Synthetic pattern of the pathway : **sckdy**

| Reference Protein                 | EC Number                | Genolevures gene families |                |                          |
|-----------------------------------|--------------------------|---------------------------|----------------|--------------------------|
|                                   |                          | Phyletic pattern          | Profile        | Family name              |
| <a href="#">HXK1 (YFR053e)</a>    | <a href="#">2.7.1.1</a>  | sckdy                     | 5 5 2 3 3      | <a href="#">GLR.3217</a> |
| <a href="#">HXK2 (YGL253w)</a>    | <a href="#">2.7.1.1</a>  | sckdy                     | 5 5 2 3 3      | <a href="#">GLR.3217</a> |
| <a href="#">SUC2 (YIL162w)</a>    | <a href="#">3.2.1.26</a> | s-kdy                     | 1 0 1 1 1      | <a href="#">GLR.1234</a> |
| <a href="#">MAL32 (YBR299w)</a>   | <a href="#">3.2.1.20</a> | s-kd-                     | 7 0 1 2 0      | <a href="#">GLC.151</a>  |
| <a href="#">YGR287C (YGR287e)</a> | <a href="#">3.2.1.20</a> | s-kd-                     | 7 0 1 2 0      | <a href="#">GLC.151</a>  |
| <a href="#">MAL12 (YGR292w)</a>   | <a href="#">3.2.1.20</a> | s-kd-                     | 7 0 1 2 0      | <a href="#">GLC.151</a>  |
| <a href="#">YIL172C (YIL172c)</a> | <a href="#">3.2.1.20</a> | s-kd-                     | 7 0 1 2 0      | <a href="#">GLC.151</a>  |
| <a href="#">YJL216C (YJL216c)</a> | <a href="#">3.2.1.20</a> | s-kd-                     | 7 0 1 2 0      | <a href="#">GLC.151</a>  |
| <a href="#">ESP2 (YJL221c)</a>    | <a href="#">3.2.1.20</a> | s-kd-                     | 7 0 1 2 0      | <a href="#">GLC.151</a>  |
| <a href="#">GSC2 (YGR032w)</a>    | <a href="#">2.4.1.34</a> | sckdy                     | 3 3 3 2 2      | <a href="#">GLR.23</a>   |
| <a href="#">FKS1 (YLR342w)</a>    | <a href="#">2.4.1.34</a> | sckdy                     | 3 3 3 2 2      | <a href="#">GLR.23</a>   |
| <a href="#">FKS3 (YMR306w)</a>    | <a href="#">2.4.1.34</a> | sckdy                     | 3 3 3 2 2      | <a href="#">GLR.23</a>   |
| <a href="#">YHL012W (YHL012w)</a> | <a href="#">2.7.7.9</a>  | sckdy                     | 2 1 1 1 1      | <a href="#">GLR.2246</a> |
| <a href="#">UGP1 (YKL035w)</a>    | <a href="#">2.7.7.9</a>  | sckdy                     | 2 1 1 1 1      | <a href="#">GLR.2246</a> |
| <a href="#">TPS1 (YBR126c)</a>    | <a href="#">2.4.1.15</a> | sckdy                     | 4 4 3 3 3      | <a href="#">GLR.1979</a> |
| <a href="#">TPS2 (YDR074w)</a>    |                          | sckdy                     | 4 4 3 3 3      | <a href="#">GLR.1979</a> |
| <a href="#">TSL1 (YML100w)</a>    | <a href="#">2.4.1.15</a> | sckdy                     | 4 4 3 3 3      | <a href="#">GLR.1979</a> |
| <a href="#">TPS3 (YMR261c)</a>    | <a href="#">2.4.1.15</a> | sckdy                     | 4 4 3 3 3      | <a href="#">GLR.1979</a> |
| <a href="#">GSY1 (YFR015c)</a>    | <a href="#">2.4.1.11</a> | sckdy                     | 2 2 1 1 1      | <a href="#">GLR.110</a>  |
| <a href="#">GSY2 (YLR258w)</a>    | <a href="#">2.4.1.11</a> | sckdy                     | 2 2 1 1 1      | <a href="#">GLR.110</a>  |
| <a href="#">PGM1 (YKL127w)</a>    | <a href="#">5.4.2.2</a>  | sckdy                     | 2 2 1 1 1      | <a href="#">GLR.2142</a> |
| <a href="#">PGM2 (YMR105c)</a>    | <a href="#">5.4.2.2</a>  | sckdy                     | 2 2 1 1 1      | <a href="#">GLR.2142</a> |
| <a href="#">GLK1 (CYCL040w)</a>   | <a href="#">2.7.1.2</a>  | sckdy                     | 5 5 2 3 3      | <a href="#">GLR.3217</a> |
| <a href="#">PGH1 (YBR196c)</a>    | <a href="#">5.3.1.9</a>  | sckdy                     | 1 1 1 1 1      | <a href="#">GLR.582</a>  |
| <a href="#">GLC3 (YEL011w)</a>    | <a href="#">2.4.1.18</a> | sckdy                     | 1 1 1 1 1      | <a href="#">GLR.790</a>  |
| <a href="#">NTH2 (YBR001c)</a>    | <a href="#">3.2.1.28</a> | sckdy                     | 2 2 1 1 1      | <a href="#">GLR.157</a>  |
| <a href="#">NTH1 (YDR001c)</a>    | <a href="#">3.2.1.28</a> | sckdy                     | 2 2 1 1 1      | <a href="#">GLR.157</a>  |
| <a href="#">ATH1 (YPR026w)</a>    | <a href="#">3.2.1.28</a> | sckd-                     | 1 1 1 1 0      | <a href="#">GLR.1078</a> |
| <a href="#">BSC1 (YDL037c)</a>    | <a href="#">3.2.1.3</a>  | sckdy                     | 45 35 26 36 48 | <a href="#">GLC.1</a>    |
| <a href="#">SGA1 (YIL099w)</a>    | <a href="#">3.2.1.3</a>  | sckdy                     | 1 1 1 1 1      | <a href="#">GLR.507</a>  |
| <a href="#">MUC1 (YIR019c)</a>    | <a href="#">3.2.1.3</a>  | sckdy                     | 7 4 12 8 43    | <a href="#">GLC.11</a>   |
| <a href="#">PGU1 (YJR153w)</a>    | <a href="#">3.2.1.15</a> | s----                     | 1 0 0 0 0      | none                     |
| <a href="#">GPH1 (YPR160w)</a>    | <a href="#">2.4.1.1</a>  | sckdy                     | 1 1 1 1 1      | <a href="#">GLR.500</a>  |
| <a href="#">EXG2 (YDR261c)</a>    | <a href="#">3.2.1.58</a> | sckdy                     | 4 4 2 5 2      | <a href="#">GLR.3219</a> |
| <a href="#">BGL2 (YGR282c)</a>    | <a href="#">3.2.1.58</a> | sckdy                     | 1 1 1 2 2      | <a href="#">GLR.3339</a> |
| <a href="#">EXG1 (YLR300w)</a>    | <a href="#">3.2.1.58</a> | sckdy                     | 4 4 2 5 2      | <a href="#">GLR.3219</a> |
| <a href="#">SPR1 (YOR190w)</a>    | <a href="#">3.2.1.58</a> | sckdy                     | 4 4 2 5 2      | <a href="#">GLR.3219</a> |
| <a href="#">VPS8 (YAL002w)</a>    | <a href="#">2.7.1.-</a>  | sckd-                     | 1 1 1 1 0      | <a href="#">GLR.1058</a> |
| <a href="#">CDC15 (YAR019c)</a>   | <a href="#">2.7.1.-</a>  | sckdy                     | 57 58 49 54 42 | <a href="#">GLC.2</a>    |
| <a href="#">VPS15 (YBR097w)</a>   | <a href="#">2.7.1.-</a>  | sckdy                     | 1 1 1 1 1      | <a href="#">GLR.2300</a> |
| <a href="#">DUN1 (YDL101c)</a>    | <a href="#">2.7.1.-</a>  | sckdy                     | 57 58 49 54 42 | <a href="#">GLC.2</a>    |
| <a href="#">KIN1 (YDR122w)</a>    | <a href="#">2.7.1.-</a>  | sckdy                     | 57 58 49 54 42 | <a href="#">GLC.2</a>    |
| <a href="#">SNF1 (YDR477w)</a>    | <a href="#">2.7.1.-</a>  | sckdy                     | 57 58 49 54 42 | <a href="#">GLC.2</a>    |
| <a href="#">SPS1 (YDR523c)</a>    | <a href="#">2.7.1.-</a>  | sckdy                     | 7 5 4 4 3      | <a href="#">GLC.52</a>   |
| <a href="#">YCK3 (YER123w)</a>    | <a href="#">2.7.1.-</a>  | sckdy                     | 4 4 2 2 2      | <a href="#">GLC.92</a>   |
| <a href="#">YCK1 (YHR135c)</a>    | <a href="#">2.7.1.-</a>  | sckdy                     | 4 4 2 2 2      | <a href="#">GLC.92</a>   |
| <a href="#">CTK2 (YJL006c)</a>    | <a href="#">2.7.1.-</a>  | s-k-y                     | 1 0 1 0 1      | <a href="#">GLR.2832</a> |
| <a href="#">IME2 (YJL106w)</a>    | <a href="#">2.7.1.-</a>  | sckdy                     | 22 19 19 21 17 | <a href="#">GLC.8</a>    |
| <a href="#">PBS2 (YJL128c)</a>    | <a href="#">2.7.1.-</a>  | sckdy                     | 7 5 4 4 3      | <a href="#">GLC.52</a>   |

|                                 |                         |       |                |                          |
|---------------------------------|-------------------------|-------|----------------|--------------------------|
| <a href="#">YAK1 (YJL141c)</a>  | <a href="#">2.7.1.-</a> | sckdy | 22 19 19 21 17 | <a href="#">GLC.8</a>    |
| <a href="#">ELM1 (YKL048c)</a>  | <a href="#">2.7.1.-</a> | sckdy | 57 58 49 54 42 | <a href="#">GLC.2</a>    |
| <a href="#">CTK1 (YKL139w)</a>  | <a href="#">2.7.1.-</a> | sckdy | 22 19 19 21 17 | <a href="#">GLC.8</a>    |
| <a href="#">CTK3 (YML112w)</a>  | <a href="#">2.7.1.-</a> | sck-- | 1 1 1 0 0      | <a href="#">GLR.1303</a> |
| <a href="#">YCK2 (YNL154c)</a>  | <a href="#">2.7.1.-</a> | sckdy | 4 4 2 2 2      | <a href="#">GLC.92</a>   |
| <a href="#">NPR1 (YNL183c)</a>  | <a href="#">2.7.1.-</a> | sckdy | 57 58 49 54 42 | <a href="#">GLC.2</a>    |
| <a href="#">MCK1 (YNL307c)</a>  | <a href="#">2.7.1.-</a> | sckdy | 22 19 19 21 17 | <a href="#">GLC.8</a>    |
| <a href="#">MKK1 (YOR231w)</a>  | <a href="#">2.7.1.-</a> | sckdy | 7 5 4 4 3      | <a href="#">GLC.52</a>   |
| <a href="#">SSN3 (YPL042c)</a>  | <a href="#">2.7.1.-</a> | sckdy | 22 19 19 21 17 | <a href="#">GLC.8</a>    |
| <a href="#">MKK2 (YPL140c)</a>  | <a href="#">2.7.1.-</a> | sckdy | 7 5 4 4 3      | <a href="#">GLC.52</a>   |
| <a href="#">HRR25 (YPL204w)</a> | <a href="#">2.7.1.-</a> | sckdy | 4 4 2 2 2      | <a href="#">GLC.92</a>   |
| <a href="#">ENA5 (YDR038c)</a>  | <a href="#">3.6.1.-</a> | sckdy | 5 4 4 4 5      | <a href="#">GLC.54</a>   |
| <a href="#">ENA1 (YDR040c)</a>  | <a href="#">3.6.1.-</a> | sckdy | 5 4 4 4 5      | <a href="#">GLC.54</a>   |
| <a href="#">RAD3 (YER171w)</a>  | <a href="#">3.6.1.-</a> | sckdy | 2 2 2 2 2      | <a href="#">GLR.3298</a> |
| <a href="#">BRR2 (YER172c)</a>  | <a href="#">3.6.1.-</a> | sckdy | 5 5 6 5 8      | <a href="#">GLC.40</a>   |
| <a href="#">SLH1 (YGR271w)</a>  | <a href="#">3.6.1.-</a> | sckdy | 5 5 6 5 8      | <a href="#">GLC.40</a>   |
| <a href="#">HPR5 (YJL092w)</a>  | <a href="#">3.6.1.-</a> | sckdy | 2 2 3 2 1      | <a href="#">GLR.3280</a> |
| <a href="#">DDP1 (YOR163w)</a>  | <a href="#">3.6.1.-</a> | sckdy | 1 1 1 1 1      | <a href="#">GLR.894</a>  |

See [detailed view](#)

### Detailed view

| Reference Protein              | EC Number               | Annotation                                                              | Systematic gene deletion | Gene deletion effects (growth rate) |                |     |            |              | Genolevures gene families |           |                          |                              |                                                                                                                                         |
|--------------------------------|-------------------------|-------------------------------------------------------------------------|--------------------------|-------------------------------------|----------------|-----|------------|--------------|---------------------------|-----------|--------------------------|------------------------------|-----------------------------------------------------------------------------------------------------------------------------------------|
|                                |                         |                                                                         |                          | 20 gen. in YPD                      | 60 gen. in YPD | YNB | YPD + NaCl | YP + lactate | Phyletic pattern          | Profile   | Family name              | Gene Name                    | Gene Annotation                                                                                                                         |
| <a href="#">HXK1 (YFR053C)</a> | <a href="#">2.7.1.1</a> | spIP04806 Saccharomyces cerevisiae YFR053c HXK1 hexokinase I P4.22.f4.1 | viable                   | NA                                  | NA             | NA  | NA         | NA           | sckdy                     | 5 5 2 3 3 | <a href="#">GLR.3217</a> | <a href="#">YAL10E15488g</a> | similar to spIP17709 Saccharomyces cerevisiae YCL040w GLK1 aldohexose specific glucokinase, hypothetical                                |
|                                |                         |                                                                         |                          |                                     |                |     |            |              |                           |           |                          | <a href="#">CAGL0A04829g</a> | highly similar to spIP04807 Saccharomyces cerevisiae YGL25 HXK2 or spIP04806 Saccharomyces cerevisiae YFR053c HXK1, start by similarity |
|                                |                         |                                                                         |                          |                                     |                |     |            |              |                           |           |                          | <a href="#">DEHA0F26092g</a> | similar to trIQ9C0M1 Candida albicans CaNAG5 protein, hypothetical start by similarity                                                  |
|                                |                         |                                                                         |                          |                                     |                |     |            |              |                           |           |                          | <a href="#">CAGL0M00682g</a> | similar to trIQ6204 Saccharomyces cerevisiae YLR446w, hypothetical                                                                      |
|                                |                         |                                                                         |                          |                                     |                |     |            |              |                           |           |                          | <a href="#">CAGL0F00605g</a> | highly similar to spIP17709 Saccharomyces cerevisiae YCL040w GLK1 or Q04409 Saccharomyces cerevisiae YDR516c, start by similarity       |
|                                |                         |                                                                         |                          |                                     |                |     |            |              |                           |           |                          | <a href="#">CAGL0B00726g</a> | weakly similar to spIP17709 Saccharomyces cerevisiae YCL040w GLK1 aldohexose specific glucokinase, start by similarity                  |
|                                |                         |                                                                         |                          |                                     |                |     |            |              |                           |           |                          | <a href="#">YAL10E20207g</a> | weakly similar to trIQ9C0M1 Candida albicans CaNAG5 protein, hypothetical start                                                         |

|                                |                          |                                                                                                  |                                                        |     |     |     |     |     |       |           |                          |                              |                                                                                                                                           |
|--------------------------------|--------------------------|--------------------------------------------------------------------------------------------------|--------------------------------------------------------|-----|-----|-----|-----|-----|-------|-----------|--------------------------|------------------------------|-------------------------------------------------------------------------------------------------------------------------------------------|
|                                |                          |                                                                                                  |                                                        |     |     |     |     |     |       |           |                          | <a href="#">DEHA0E15169g</a> | highly similar to splP50506 Debaryomyces occidentalis Hexokinase (EC 2.7.1.1), start by similarity                                        |
|                                |                          |                                                                                                  |                                                        |     |     |     |     |     |       |           |                          | <a href="#">KLLA0C01155g</a> | similar to splP17709 Saccharomyces cerevisiae YCL040w GLK1 aldohexose specific glucokinase, start by similarity                           |
|                                |                          |                                                                                                  |                                                        |     |     |     |     |     |       |           |                          | <a href="#">CAGL0H07579g</a> | highly similar to splP04807 Saccharomyces cerevisiae YGL253w HXK2 or splP04806 Saccharomyces cerevisiae YFR053c HXK1, start by similarity |
|                                |                          |                                                                                                  |                                                        |     |     |     |     |     |       |           |                          | <a href="#">KLLA0D11352g</a> | gil462368 splP33284 HXK_KLUYVEROMYCES LACTIS HEXOKINASE start by similarity                                                               |
|                                |                          |                                                                                                  |                                                        |     |     |     |     |     |       |           |                          | <a href="#">YALI0B22308g</a> | highly similar to trlO74996 Yarrowia lipolytica Hexokinase, hypothetical                                                                  |
|                                |                          |                                                                                                  |                                                        |     |     |     |     |     |       |           |                          | <a href="#">DEHA0E07007g</a> | highly similar to CA0263 Candida albicans aldohexose specific glucokinase, start by similarity                                            |
| <a href="#">HXK2 (YGL253W)</a> | <a href="#">2.7.1.1</a>  | splP04807 Saccharomyces cerevisiae YGL253w HXK2 hexokinase II P4.22.f4.1                         | Exhibits growth defect on a fermentable carbon source. | 0.4 | 0.2 | 0.6 | Non | 0.7 | sekdy | 5 5 2 3 3 | <a href="#">GLR.3217</a> | <a href="#">YALI0E15488g</a> | similar to splP17709 Saccharomyces cerevisiae YCL040w GLK1 aldohexose specific glucokinase, hypothetical                                  |
|                                |                          |                                                                                                  |                                                        |     |     |     |     |     |       |           |                          | <a href="#">CAGL0A04829g</a> | highly similar to splP04807 Saccharomyces cerevisiae YGL253w HXK2 or splP04806 Saccharomyces cerevisiae YFR053c HXK1, start by similarity |
|                                |                          |                                                                                                  |                                                        |     |     |     |     |     |       |           |                          | <a href="#">DEHA0F26092g</a> | similar to trlQ9C0M1 Candida albicans CaNAG5 protein, hypothetical                                                                        |
|                                |                          |                                                                                                  |                                                        |     |     |     |     |     |       |           |                          | <a href="#">CAGL0M00682g</a> | similar to trlQ06204 Saccharomyces cerevisiae YLR446w, hypothetical                                                                       |
|                                |                          |                                                                                                  |                                                        |     |     |     |     |     |       |           |                          | <a href="#">CAGL0F00605g</a> | highly similar to splP17709 Saccharomyces cerevisiae YCL040w GLK1 or Q04409 Saccharomyces cerevisiae YDR516c, start by similarity         |
|                                |                          |                                                                                                  |                                                        |     |     |     |     |     |       |           |                          | <a href="#">CAGL0B00726g</a> | weakly similar to splP17709 Saccharomyces cerevisiae YCL040w GLK1 aldohexose specific glucokinase, start by similarity                    |
|                                |                          |                                                                                                  |                                                        |     |     |     |     |     |       |           |                          | <a href="#">YALI0E20207g</a> | weakly similar to trlQ9C0M1 Candida albicans CaNAG5 protein, hypothetical                                                                 |
|                                |                          |                                                                                                  |                                                        |     |     |     |     |     |       |           |                          | <a href="#">DEHA0F15169g</a> | highly similar to splP50506 Debaryomyces occidentalis Hexokinase (EC 2.7.1.1), start by similarity                                        |
|                                |                          |                                                                                                  |                                                        |     |     |     |     |     |       |           |                          | <a href="#">KLLA0C01155g</a> | similar to splP17709 Saccharomyces cerevisiae YCL040w GLK1 aldohexose specific glucokinase, start by similarity                           |
|                                |                          |                                                                                                  |                                                        |     |     |     |     |     |       |           |                          | <a href="#">CAGL0H07579g</a> | highly similar to splP04807 Saccharomyces cerevisiae YGL253w HXK2 or splP04806 Saccharomyces cerevisiae YFR053c HXK1, start by similarity |
|                                |                          |                                                                                                  |                                                        |     |     |     |     |     |       |           |                          | <a href="#">KLLA0D11352g</a> | gil462368 splP33284 HXK_KLUYVEROMYCES LACTIS HEXOKINASE start by similarity                                                               |
|                                |                          |                                                                                                  |                                                        |     |     |     |     |     |       |           |                          | <a href="#">YALI0B22308g</a> | highly similar to trlO74996 Yarrowia lipolytica Hexokinase, hypothetical                                                                  |
|                                |                          |                                                                                                  |                                                        |     |     |     |     |     |       |           |                          | <a href="#">DEHA0E07007g</a> | highly similar to CA0263 Candida albicans aldohexose specific glucokinase, start by similarity                                            |
| <a href="#">SUC2 (YIL162W)</a> | <a href="#">3.2.1.26</a> | splP00724 Saccharomyces cerevisiae YIL162w SUC2 invertase (sucrose hydrolyzing enzyme) singleton | viable                                                 | NA  | NA  | NA  | NA  | NA  | s-kdy | 1 0 1 1 1 | <a href="#">GLR.1234</a> | <a href="#">YALI0E26719g</a> | splQ12724 disrupted by Saccharomyces cerevisiae Invertase 2 precursor identified start                                                    |
|                                |                          |                                                                                                  |                                                        |     |     |     |     |     |       |           |                          | <a href="#">DEHA0F28468g</a> | similar to splP24133 Debaryomyces occidentalis invertase precursor (3.2.1.26) (Beta-fructofuranosidase (Saccharase), start by similarity  |
|                                |                          |                                                                                                  |                                                        |     |     |     |     |     |       |           |                          | <a href="#">KLLA0A10417g</a> | gil4808541 gblAAD29850.1 AF0793 KLUYVEROMYCES LACTIS invertase, start by similarity                                                       |
|                                |                          | splP38158                                                                                        |                                                        |     |     |     |     |     |       |           |                          | <a href="#">DEHA0E00627g</a> | similar to trlQ8J2T6 Aspergillus oryzae Alpha-glucosidase, hypothetical                                                                   |
|                                |                          |                                                                                                  |                                                        |     |     |     |     |     |       |           |                          |                              | highly similar to CA3405 SIBER...                                                                                                         |

|                                   |                          |                                                                                                                    |        |     |     |     |     |     |        |              |                         |                              |                                                                                                                                           |
|-----------------------------------|--------------------------|--------------------------------------------------------------------------------------------------------------------|--------|-----|-----|-----|-----|-----|--------|--------------|-------------------------|------------------------------|-------------------------------------------------------------------------------------------------------------------------------------------|
| <a href="#">MAL32 (YBR299W)</a>   | <a href="#">3.2.1.20</a> | Saccharomyces cerevisiae YBR299w MAL31 alpha-glucosidase P7.4.f7.1                                                 | -      | NA  | NA  | NA  | NA  | NA  | s-kd-  | 7 0 1 2<br>0 | <a href="#">GLC.151</a> | <a href="#">DEHA0A14300g</a> | highly similar to CA3405IIPF8644 maltase homology), start by similarity                                                                   |
|                                   |                          |                                                                                                                    |        |     |     |     |     |     |        |              |                         | <a href="#">KLLA0D00231g</a> | gil5441460lembCAB46746.1 Kluyveromyces lactis maltase, start by similarity                                                                |
| <a href="#">YGR287C (YGR287C)</a> | <a href="#">3.2.1.20</a> | spIP53051 Saccharomyces cerevisiae YGR287c strong similarity to maltase P7.4.f7.1                                  | viable | 0.8 | 0.5 | 0.7 | Non | 0.6 | s-kd-  | 7 0 1 2<br>0 | <a href="#">GLC.151</a> | <a href="#">DEHA0E00627g</a> | similar to trIQ8J2T6 Aspergillus or Alpha-glucosidase, hypothetical s                                                                     |
|                                   |                          |                                                                                                                    |        |     |     |     |     |     |        |              |                         | <a href="#">DEHA0A14300g</a> | highly similar to CA3405IIPF8644 maltase homology), start by similarity                                                                   |
|                                   |                          |                                                                                                                    |        |     |     |     |     |     |        |              |                         | <a href="#">KLLA0D00231g</a> | gil5441460lembCAB46746.1 Kluyveromyces lactis maltase, start by similarity                                                                |
| <a href="#">MAL12 (YGR292W)</a>   | <a href="#">3.2.1.20</a> | spIP53341 Saccharomyces cerevisiae YGR292w MAL12 alpha-glucosidase of the MAL1 locus P7.4.f7.1                     | -      | Non | Non | Non | ND  | Non | s-kd-  | 7 0 1 2<br>0 | <a href="#">GLC.151</a> | <a href="#">DEHA0E00627g</a> | similar to trIQ8J2T6 Aspergillus or Alpha-glucosidase, hypothetical s                                                                     |
|                                   |                          |                                                                                                                    |        |     |     |     |     |     |        |              |                         | <a href="#">DEHA0A14300g</a> | highly similar to CA3405IIPF8644 maltase homology), start by similarity                                                                   |
|                                   |                          |                                                                                                                    |        |     |     |     |     |     |        |              |                         | <a href="#">KLLA0D00231g</a> | gil5441460lembCAB46746.1 Kluyveromyces lactis maltase, start by similarity                                                                |
| <a href="#">YIL172C (YIL172C)</a> | <a href="#">3.2.1.20</a> | spIP40439 Saccharomyces cerevisiae YIL172c identical to FSP2P and similarity to other alpha-glucosidases P7.4.f7.1 | -      | NA  | NA  | NA  | NA  | NA  | s-kd-  | 7 0 1 2<br>0 | <a href="#">GLC.151</a> | <a href="#">DEHA0E00627g</a> | similar to trIQ8J2T6 Aspergillus or Alpha-glucosidase, hypothetical s                                                                     |
|                                   |                          |                                                                                                                    |        |     |     |     |     |     |        |              |                         | <a href="#">DEHA0A14300g</a> | highly similar to CA3405IIPF8644 maltase homology), start by similarity                                                                   |
|                                   |                          |                                                                                                                    |        |     |     |     |     |     |        |              |                         | <a href="#">KLLA0D00231g</a> | gil5441460lembCAB46746.1 Kluyveromyces lactis maltase, start by similarity                                                                |
| <a href="#">YJL216C (YJL216C)</a> | <a href="#">3.2.1.20</a> | spIP40884 Saccharomyces cerevisiae YJL216c strong similarity to Mal62p P7.4.f7.1                                   | viable | NA  | NA  | NA  | NA  | NA  | s-kd-  | 7 0 1 2<br>0 | <a href="#">GLC.151</a> | <a href="#">DEHA0E00627g</a> | similar to trIQ8J2T6 Aspergillus or Alpha-glucosidase, hypothetical s                                                                     |
|                                   |                          |                                                                                                                    |        |     |     |     |     |     |        |              |                         | <a href="#">DEHA0A14300g</a> | highly similar to CA3405IIPF8644 maltase homology), start by similarity                                                                   |
|                                   |                          |                                                                                                                    |        |     |     |     |     |     |        |              |                         | <a href="#">KLLA0D00231g</a> | gil5441460lembCAB46746.1 Kluyveromyces lactis maltase, start by similarity                                                                |
| <a href="#">FSP2 (YJL221C)</a>    | <a href="#">3.2.1.20</a> | spIP40439 Saccharomyces cerevisiae YJL221c FSP2 strong similarity to alpha-D-glucosidase P7.4.f7.1                 | -      | NA  | NA  | NA  | NA  | NA  | s-kd-  | 7 0 1 2<br>0 | <a href="#">GLC.151</a> | <a href="#">DEHA0E00627g</a> | similar to trIQ8J2T6 Aspergillus or Alpha-glucosidase, hypothetical s                                                                     |
|                                   |                          |                                                                                                                    |        |     |     |     |     |     |        |              |                         | <a href="#">DEHA0A14300g</a> | highly similar to CA3405IIPF8644 maltase homology), start by similarity                                                                   |
|                                   |                          |                                                                                                                    |        |     |     |     |     |     |        |              |                         | <a href="#">KLLA0D00231g</a> | gil5441460lembCAB46746.1 Kluyveromyces lactis maltase, start by similarity                                                                |
| <a href="#">GSC2 (YGR032W)</a>    | <a href="#">2.4.1.34</a> | spIP40989 Saccharomyces cerevisiae YGR032w GSC2 1,3-beta-D-glucan synthase subunit P3.64.f3.1                      | viable | 0.3 | 0.3 | 0.3 | 0.3 | 0.2 | seckdy | 3 3 3 2<br>2 | <a href="#">GLR.23</a>  | <a href="#">YALI0E21021g</a> | trIQ9UVK9 Yarrowia lipolytica glu synthase, identified start                                                                              |
|                                   |                          |                                                                                                                    |        |     |     |     |     |     |        |              |                         | <a href="#">YALI0C01411g</a> | similar to trIQ9UVK9 Yarrowia lipolytica Fks1p, hypothetical sta                                                                          |
|                                   |                          |                                                                                                                    |        |     |     |     |     |     |        |              |                         | <a href="#">KLLA0B05841g</a> | highly similar to spIP40989 Saccharomyces cerevisiae GR032w GSC2 1, 3-beta-D-glucan synthase subunit, start by similarity                 |
|                                   |                          |                                                                                                                    |        |     |     |     |     |     |        |              |                         | <a href="#">CAGL0G01034g</a> | highly similar to spIP40989 Saccharomyces cerevisiae YGR032w GSC2 or spIP38631 Saccharomyces cerevisiae YLR342w FKS1, start by similarity |
|                                   |                          |                                                                                                                    |        |     |     |     |     |     |        |              |                         | <a href="#">DEHA0C02112g</a> | highly similar to trO13428 Candida albicans Beta-1, 3-glucan synthase catalytic subunit 1, start by simila                                |
|                                   |                          |                                                                                                                    |        |     |     |     |     |     |        |              |                         | <a href="#">CAGL0M13827g</a> | similar to spIQ04952 Saccharomyces cerevisiae YMR306w FKS3, hypothetical start                                                            |
|                                   |                          |                                                                                                                    |        |     |     |     |     |     |        |              |                         | <a href="#">KLLA0C08888g</a> | similar to spO13423 Candida albicans Glucan synthase, start by similar                                                                    |
|                                   |                          |                                                                                                                    |        |     |     |     |     |     |        |              |                         | <a href="#">KLLA0C14069g</a> | similar to spIQ04952 Saccharomyces cerevisiae YMR306w FKS3, start by similarity                                                           |
|                                   |                          |                                                                                                                    |        |     |     |     |     |     |        |              |                         | <a href="#">CAGL0K04037g</a> | trIQ9P8N8 Candida glabrata 1, 3-beta-D-glucan synthase, identified star                                                                   |
|                                   |                          |                                                                                                                    |        |     |     |     |     |     |        |              |                         |                              | similar to spIQ04952 Saccharomyces cerevisiae YMR306w FKS3, hypothetical start                                                            |

|                                   |                          |                                                                                                          |                                                        |     |     |     |     |     |        |           |                          |                              |                                                                                                                                         |                                                                                                                                         |
|-----------------------------------|--------------------------|----------------------------------------------------------------------------------------------------------|--------------------------------------------------------|-----|-----|-----|-----|-----|--------|-----------|--------------------------|------------------------------|-----------------------------------------------------------------------------------------------------------------------------------------|-----------------------------------------------------------------------------------------------------------------------------------------|
|                                   |                          |                                                                                                          |                                                        |     |     |     |     |     |        |           |                          | <a href="#">DEHA0A07436g</a> | cerevisiae YMR306w FKS3 1,3-b-glucan synthase, start by similarity                                                                      |                                                                                                                                         |
| <a href="#">FKS1 (YLR342W)</a>    | <a href="#">2.4.1.34</a> | splP38631 Saccharomyces cerevisiae YLR342w FKS1 1,3-beta-D-glucan synthase, catalytic subunit P3.64.f3.1 | Exhibits growth defect on a fermentable carbon source. | NA  | NA  | NA  | NA  | NA  | NA     | seckdy    | 3 3 3 2 2                | <a href="#">GLR.23</a>       | <a href="#">YALI0E21021g</a>                                                                                                            | trlQ9UVK9 Yarrowia lipolytica glucan synthase, identified start                                                                         |
|                                   |                          |                                                                                                          |                                                        |     |     |     |     |     |        |           |                          |                              | <a href="#">YALI0C01411g</a>                                                                                                            | similar to trlQ9UVK9 Yarrowia lipolytica Fks1p, hypothetical start                                                                      |
|                                   |                          |                                                                                                          |                                                        |     |     |     |     |     |        |           |                          |                              | <a href="#">KLLA0B05841g</a>                                                                                                            | highly similar to splP40989 Saccharomyces cerevisiae GR03 GSC2 1, 3-beta-D-glucan synthase subunit, start by similarity                 |
|                                   |                          |                                                                                                          |                                                        |     |     |     |     |     |        |           |                          |                              | <a href="#">CAGL0G01034g</a>                                                                                                            | highly similar to splP40989 Saccharomyces cerevisiae YGR03 GSC2 or splP38631 Saccharomyces cerevisiae YLR342w FKS1, start by similarity |
|                                   |                          |                                                                                                          |                                                        |     |     |     |     |     |        |           |                          |                              | <a href="#">DEHA0C02112g</a>                                                                                                            | highly similar to trlO13428 Candida albicans Beta-1, 3-glucan synthase catalytic subunit 1, start by similarity                         |
|                                   |                          |                                                                                                          |                                                        |     |     |     |     |     |        |           |                          |                              | <a href="#">CAGL0M13827g</a>                                                                                                            | similar to splQ04952 Saccharomyces cerevisiae YMR306w FKS3, hypothetical start                                                          |
|                                   |                          |                                                                                                          |                                                        |     |     |     |     |     |        |           |                          |                              | <a href="#">KLLA0C08888g</a>                                                                                                            | similar to splO13423 Candida albicans Glucan synthase, start by similarity                                                              |
|                                   |                          |                                                                                                          |                                                        |     |     |     |     |     |        |           |                          |                              | <a href="#">KLLA0C14069g</a>                                                                                                            | similar to splQ04952 Saccharomyces cerevisiae YMR306w FKS3, start by similarity                                                         |
|                                   |                          |                                                                                                          |                                                        |     |     |     |     |     |        |           |                          |                              | <a href="#">CAGL0K04037g</a>                                                                                                            | trlQ9P8N8 Candida glabrata 1, 3-beta-glucan synthase, identified start                                                                  |
|                                   |                          |                                                                                                          |                                                        |     |     |     |     |     |        |           |                          |                              | <a href="#">DEHA0A07436g</a>                                                                                                            | similar to splQ04952 Saccharomyces cerevisiae YMR306w FKS3 1,3-b-glucan synthase, start by similarity                                   |
| <a href="#">FKS3 (YMR306W)</a>    | <a href="#">2.4.1.34</a> | splQ04952 Saccharomyces cerevisiae YMR306w FKS3 similarity to 1,3-beta-glucan synthases P3.64.f3.1       | viable                                                 | 0.4 | 0.5 | 0.4 | 0.7 | 0.7 | seckdy | 3 3 3 2 2 | <a href="#">GLR.23</a>   | <a href="#">YALI0E21021g</a> | trlQ9UVK9 Yarrowia lipolytica glucan synthase, identified start                                                                         |                                                                                                                                         |
|                                   |                          |                                                                                                          |                                                        |     |     |     |     |     |        |           |                          | <a href="#">YALI0C01411g</a> | similar to trlQ9UVK9 Yarrowia lipolytica Fks1p, hypothetical start                                                                      |                                                                                                                                         |
|                                   |                          |                                                                                                          |                                                        |     |     |     |     |     |        |           |                          | <a href="#">KLLA0B05841g</a> | highly similar to splP40989 Saccharomyces cerevisiae GR03 GSC2 1, 3-beta-D-glucan synthase subunit, start by similarity                 |                                                                                                                                         |
|                                   |                          |                                                                                                          |                                                        |     |     |     |     |     |        |           |                          | <a href="#">CAGL0G01034g</a> | highly similar to splP40989 Saccharomyces cerevisiae YGR03 GSC2 or splP38631 Saccharomyces cerevisiae YLR342w FKS1, start by similarity |                                                                                                                                         |
|                                   |                          |                                                                                                          |                                                        |     |     |     |     |     |        |           |                          | <a href="#">DEHA0C02112g</a> | highly similar to trlO13428 Candida albicans Beta-1, 3-glucan synthase catalytic subunit 1, start by similarity                         |                                                                                                                                         |
|                                   |                          |                                                                                                          |                                                        |     |     |     |     |     |        |           |                          | <a href="#">CAGL0M13827g</a> | similar to splQ04952 Saccharomyces cerevisiae YMR306w FKS3, hypothetical start                                                          |                                                                                                                                         |
|                                   |                          |                                                                                                          |                                                        |     |     |     |     |     |        |           |                          | <a href="#">KLLA0C08888g</a> | similar to splO13423 Candida albicans Glucan synthase, start by similarity                                                              |                                                                                                                                         |
|                                   |                          |                                                                                                          |                                                        |     |     |     |     |     |        |           |                          | <a href="#">KLLA0C14069g</a> | similar to splQ04952 Saccharomyces cerevisiae YMR306w FKS3, start by similarity                                                         |                                                                                                                                         |
|                                   |                          |                                                                                                          |                                                        |     |     |     |     |     |        |           |                          | <a href="#">CAGL0K04037g</a> | trlQ9P8N8 Candida glabrata 1, 3-beta-glucan synthase, identified start                                                                  |                                                                                                                                         |
|                                   |                          |                                                                                                          |                                                        |     |     |     |     |     |        |           |                          | <a href="#">DEHA0A07436g</a> | similar to splQ04952 Saccharomyces cerevisiae YMR306w FKS3 1,3-b-glucan synthase, start by similarity                                   |                                                                                                                                         |
| <a href="#">YHL012W (YHL012W)</a> | <a href="#">2.7.7.9</a>  | splP38709 Saccharomyces cerevisiae YHL012w similarity to UDP Glucose pyrophosphorylase P2.308.f2.1       | viable                                                 | 0.4 | Non | Non | 0.6 | 0.3 | seckdy | 2 1 1 1 1 | <a href="#">GLR.2246</a> | <a href="#">KLLA0F25652g</a> | highly similar to splP32861 Saccharomyces cerevisiae YKL03 UGP1 UTP--glucose-1-phosphate uridylyltransferase, start by similarity       |                                                                                                                                         |
|                                   |                          |                                                                                                          |                                                        |     |     |     |     |     |        |           |                          | <a href="#">DEHA0G24310g</a> | highly similar to CAGL-IPF7445 Candida glabrata IPF 7445.3, start by similarity                                                         |                                                                                                                                         |
|                                   |                          |                                                                                                          |                                                        |     |     |     |     |     |        |           |                          | <a href="#">YALI0A02310g</a> | highly similar to splP32861 Saccharomyces cerevisiae YKL03 UGP1 UTP--glucose-1-phosphate uridylyltransferase, start by similarity       |                                                                                                                                         |
|                                   |                          |                                                                                                          |                                                        |     |     |     |     |     |        |           |                          | <a href="#">CAGL0I01025g</a> | highly similar to splP32861 Saccharomyces cerevisiae YKL03 UGP1 UTP--glucose-1-phosphate uridylyltransferase, start by similarity       |                                                                                                                                         |

|                                |                                                                                                                                        |                                                                                                                          |                                                        |     |     |     |     |     |       |              |                          |                              |                                                                                                                                                                                                                         |
|--------------------------------|----------------------------------------------------------------------------------------------------------------------------------------|--------------------------------------------------------------------------------------------------------------------------|--------------------------------------------------------|-----|-----|-----|-----|-----|-------|--------------|--------------------------|------------------------------|-------------------------------------------------------------------------------------------------------------------------------------------------------------------------------------------------------------------------|
|                                |                                                                                                                                        |                                                                                                                          |                                                        |     |     |     |     |     |       |              |                          | <a href="#">CAGL0L01925g</a> | UGP1 UTP--glucose-1-phosphate uridylyltransferase, start by similarity                                                                                                                                                  |
| <a href="#">UGP1 (YKL035W)</a> | <a href="#">2.7.7.9</a>                                                                                                                | splP32861<br>Saccharomyces cerevisiae YKL035w<br>UGP1 UTP--glucose-1-phosphate uridylyltransferase P2.308.f2.1           | inviabile                                              | 0.3 | Ess | Ess | 0.5 | Ess | sckdy | 2 1 1 1<br>1 | <a href="#">GLR.2246</a> | <a href="#">KLLA0E25652g</a> | highly similar to splP32861 Saccharomyces cerevisiae YKL035w UGP1 UTP--glucose-1-phosphate uridylyltransferase, start by similarity                                                                                     |
|                                |                                                                                                                                        |                                                                                                                          |                                                        |     |     |     |     |     |       |              |                          | <a href="#">DEHA0G24310g</a> | highly similar to CAGL-IPF7445 Candida glabrata IPF 7445.3, start by similarity                                                                                                                                         |
|                                |                                                                                                                                        |                                                                                                                          |                                                        |     |     |     |     |     |       |              |                          | <a href="#">YALI0A02310g</a> | highly similar to splP32861 Saccharomyces cerevisiae YKL035w UGP1 UTP--glucose-1-phosphate uridylyltransferase, start by similarity                                                                                     |
|                                |                                                                                                                                        |                                                                                                                          |                                                        |     |     |     |     |     |       |              |                          | <a href="#">CAGL0L01925g</a> | highly similar to splP32861 Saccharomyces cerevisiae YKL035w UGP1 UTP--glucose-1-phosphate uridylyltransferase, start by similarity                                                                                     |
| <a href="#">TPS1 (YBR126C)</a> | <a href="#">2.4.1.15</a>                                                                                                               | splQ00764<br>Saccharomyces cerevisiae YBR126c<br>TPS1 alpha, alpha-trehalose-phosphate synthase, 56 KD subunit P4.6.f4.1 | Exhibits growth defect on a fermentable carbon source. | 0.7 | Ess | Ess | 0.4 | Ess | sckdy | 4 4 3 3<br>3 | <a href="#">GLR.1979</a> | <a href="#">KLLA0E11231g</a> | similar to splP38426 Saccharomyces cerevisiae YMR261c TPS3 alpha, alpha-trehalose-phosphate synthase, 115 subunit, start by similarity                                                                                  |
|                                |                                                                                                                                        |                                                                                                                          |                                                        |     |     |     |     |     |       |              |                          | <a href="#">CAGL0I09812g</a> | highly similar to splQ00764 Saccharomyces cerevisiae YBR126c TPS1 alpha, alpha-trehalose-phosphate synthase, hypothetical start                                                                                         |
|                                |                                                                                                                                        |                                                                                                                          |                                                        |     |     |     |     |     |       |              |                          | <a href="#">CAGL0I06468g</a> | similar to splP38426 Saccharomyces cerevisiae YMR261c TPS3 or splP38427 Saccharomyces cerevisiae YML100w TSL1, hypothetical start                                                                                       |
|                                |                                                                                                                                        |                                                                                                                          |                                                        |     |     |     |     |     |       |              |                          | <a href="#">YALI0D14476g</a> | similar to splP31688 Saccharomyces cerevisiae YDR074w TPS2 alpha, alpha-trehalose-phosphate synthase, 102 subunit, (trehalose 6-P phosphatase activity), start by similarity                                            |
|                                |                                                                                                                                        |                                                                                                                          |                                                        |     |     |     |     |     |       |              |                          | <a href="#">DEHA0E23210g</a> | highly similar to CA4084CaTPS1 Candida albicans CaTPS1 TREHALOSE-6-PHOSPHATE SYNTHASE, start by similarity                                                                                                              |
|                                |                                                                                                                                        |                                                                                                                          |                                                        |     |     |     |     |     |       |              |                          | <a href="#">CAGL0H02387g</a> | similar to splP38426 Saccharomyces cerevisiae YMR261c TPS3alpha splP38427 Saccharomyces cerevisiae YML100w TSL1, start by similarity                                                                                    |
|                                |                                                                                                                                        |                                                                                                                          |                                                        |     |     |     |     |     |       |              |                          | <a href="#">CAGL0G05335g</a> | highly similar to splP31688 Saccharomyces cerevisiae YDR074w TPS2 alpha, alpha-trehalose-phosphate synthase, hypothetical start                                                                                         |
|                                |                                                                                                                                        |                                                                                                                          |                                                        |     |     |     |     |     |       |              |                          | <a href="#">KLLA0B08822g</a> | gil586113 splQ07158 TPS1_KLU Kluyveromyces lactis Alpha, alpha-trehalose-phosphate synthase [UDP-forming] 56 kDa subunit (Trehalose phosphate synthase) (UDP-glucose phosphate glucosyltransferase) start by similarity |
|                                |                                                                                                                                        |                                                                                                                          |                                                        |     |     |     |     |     |       |              |                          | <a href="#">YALI0E14685g</a> | spI074932 Yarrowia lipolytica Alpha alpha-trehalose-phosphate synthase [UDP-forming], identified start                                                                                                                  |
|                                |                                                                                                                                        |                                                                                                                          |                                                        |     |     |     |     |     |       |              |                          | <a href="#">DEHA0F07392g</a> | similar to CA5505CaTPS3.3 Candida albicans CaTPS3.3 alpha, alpha-trehalose-phosphate synthase, regulatory subunit, 3-prime end (by homology), hypothetical start                                                        |
|                                |                                                                                                                                        |                                                                                                                          |                                                        |     |     |     |     |     |       |              |                          | <a href="#">YALI0E31086g</a> | similar to trlQ9P918 Pichia angustissima Trehalose phosphate synthase subunit, hypothetical start                                                                                                                       |
|                                |                                                                                                                                        |                                                                                                                          |                                                        |     |     |     |     |     |       |              |                          | <a href="#">KLLA0E10120g</a> | similar to splP31688 Saccharomyces cerevisiae YDR074w TPS2 alpha, alpha-trehalose-phosphate synthase, 102 subunit, start by similarity                                                                                  |
|                                |                                                                                                                                        |                                                                                                                          |                                                        |     |     |     |     |     |       |              |                          | <a href="#">DEHA0G13233g</a> | similar to CA5066CaTPS2 Candida albicans CaTPS2, hypothetical start                                                                                                                                                     |
| <a href="#">KLLA0E11231g</a>   | similar to splP38426 Saccharomyces cerevisiae YMR261c TPS3 alpha, alpha-trehalose-phosphate synthase, 115 subunit, start by similarity |                                                                                                                          |                                                        |     |     |     |     |     |       |              |                          |                              |                                                                                                                                                                                                                         |
|                                |                                                                                                                                        |                                                                                                                          |                                                        |     |     |     |     |     |       |              |                          |                              | highly similar to splQ00764                                                                                                                                                                                             |

|                                                   |                                                                                                                                     |                                                                                                                          |                                                        |     |     |     |     |     |       |              |                          |                              |                                                                                                                                                                                                                                |
|---------------------------------------------------|-------------------------------------------------------------------------------------------------------------------------------------|--------------------------------------------------------------------------------------------------------------------------|--------------------------------------------------------|-----|-----|-----|-----|-----|-------|--------------|--------------------------|------------------------------|--------------------------------------------------------------------------------------------------------------------------------------------------------------------------------------------------------------------------------|
| <a href="#">TPS2</a><br><a href="#">(YDR074W)</a> |                                                                                                                                     | splP31688<br>Saccharomyces cerevisiae YDR074w<br>TPS2 alpha,alpha-trehalose-phosphate synthase, 102 KD subunit P4.6.f4.1 | Exhibits growth defect on a fermentable carbon source. | Ess | Ess | Ess | 0.3 | Ess | sckdy | 4 4 3 3<br>3 | <a href="#">GLR.1979</a> | <a href="#">CAGL0J09812g</a> | Saccharomyces cerevisiae YBR12 TPS1 alpha, alpha-trehalose-phosph synthase, hypothetical start                                                                                                                                 |
|                                                   |                                                                                                                                     |                                                                                                                          |                                                        |     |     |     |     |     |       |              |                          | <a href="#">CAGL0J06468g</a> | similar to splP38426 Saccharomy cerevisiae YMR261c TPS3 or splP3 Saccharomyces cerevisiae YML10 TSL1, hypothetical start                                                                                                       |
|                                                   |                                                                                                                                     |                                                                                                                          |                                                        |     |     |     |     |     |       |              |                          | <a href="#">YALI0D14476g</a> | similar to splP31688 Saccharomy cerevisiae YDR074w TPS2 alpha, alpha-trehalose-phosphate synthase, 102 subunit, (trehalose 6-P phosphatase activity), start by similarity                                                      |
|                                                   |                                                                                                                                     |                                                                                                                          |                                                        |     |     |     |     |     |       |              |                          | <a href="#">DEHA0E23210g</a> | highly similar to CA4084CaTPS1 Candida albicans CaTPS1 TREHALOSE-6-PHOSPHATE SYNTHASE, start by similarity                                                                                                                     |
|                                                   |                                                                                                                                     |                                                                                                                          |                                                        |     |     |     |     |     |       |              |                          | <a href="#">CAGL0H02387g</a> | similar to splP38426 Saccharomy cerevisiae YMR261c TPS3alpha splP38427 Saccharomyces cerevisiae YML100w TSL1, start by similarity                                                                                              |
|                                                   |                                                                                                                                     |                                                                                                                          |                                                        |     |     |     |     |     |       |              |                          | <a href="#">CAGL0G05335g</a> | highly similar to splP31688 Saccharomyces cerevisiae YDR074w TPS2 alpha, alpha-trehalose-phosph synthase, hypothetical start                                                                                                   |
|                                                   |                                                                                                                                     |                                                                                                                          |                                                        |     |     |     |     |     |       |              |                          | <a href="#">KLLA0B08822g</a> | gil586113splQ071581TPS1_KLU Kluyveromyces lactis Alpha, alpha-trehalose-phosphate synthase [UDP-forming] 56 kDa subunit (Trehalose phosphate synthase) (UDP-glucose glucosephosphate glucosyltransferase), start by similarity |
|                                                   |                                                                                                                                     |                                                                                                                          |                                                        |     |     |     |     |     |       |              |                          | <a href="#">YALI0E14685g</a> | splO74932 Yarrowia lipolytica Alpha alpha-trehalose-phosphate synthase [UDP-forming], identified start                                                                                                                         |
|                                                   |                                                                                                                                     |                                                                                                                          |                                                        |     |     |     |     |     |       |              |                          | <a href="#">DEHA0F07392g</a> | similar to CA5505CaTPS3.3 Candida albicans CaTPS3.3 alpha,alpha-trehalose-phosphate synthase, regulatory subunit, 3-prime end (by homology), hypothetical start                                                                |
|                                                   |                                                                                                                                     |                                                                                                                          |                                                        |     |     |     |     |     |       |              |                          | <a href="#">YALI0E31086g</a> | similar to trlQ9P918 Pichia angustata Trehalose phosphate synthase subunit, hypothetical start                                                                                                                                 |
| <a href="#">KLLA0E10120g</a>                      | similar to splP31688 Saccharomy cerevisiae YDR074w TPS2 alpha, alpha-trehalose-phosphate synthase, 102 subunit, start by similarity |                                                                                                                          |                                                        |     |     |     |     |     |       |              |                          |                              |                                                                                                                                                                                                                                |
| <a href="#">DEHA0G13233g</a>                      | similar to CA5066CaTPS2 Candida albicans CaTPS2, hypothetical start                                                                 |                                                                                                                          |                                                        |     |     |     |     |     |       |              |                          |                              |                                                                                                                                                                                                                                |
| <a href="#">TSL1</a><br><a href="#">(YML100W)</a> | <a href="#">2.4.1.15</a>                                                                                                            | splP38427<br>Saccharomyces cerevisiae YML100w<br>TSL1 alpha,alpha-                                                       | viable                                                 | 0.7 | 0.4 | ND  | Non | ND  | sckdy | 4 4 3 3<br>2 | <a href="#">GLR.1979</a> | <a href="#">KLLA0E11231g</a> | similar to splP38426 Saccharomy cerevisiae YMR261c TPS3 alpha, alpha-trehalose-phosphate synthase, 115 subunit, start by similarity                                                                                            |
|                                                   |                                                                                                                                     |                                                                                                                          |                                                        |     |     |     |     |     |       |              |                          | <a href="#">CAGL0J09812g</a> | highly similar to splQ00764 Saccharomyces cerevisiae YBR12 TPS1 alpha, alpha-trehalose-phosph synthase, hypothetical start                                                                                                     |
|                                                   |                                                                                                                                     |                                                                                                                          |                                                        |     |     |     |     |     |       |              |                          | <a href="#">CAGL0J06468g</a> | similar to splP38426 Saccharomy cerevisiae YMR261c TPS3 or splP3 Saccharomyces cerevisiae YML10 TSL1, hypothetical start                                                                                                       |
|                                                   |                                                                                                                                     |                                                                                                                          |                                                        |     |     |     |     |     |       |              |                          | <a href="#">YALI0D14476g</a> | similar to splP31688 Saccharomy cerevisiae YDR074w TPS2 alpha, alpha-trehalose-phosphate synthase, 102 subunit, (trehalose 6-P phosphatase activity), start by similarity                                                      |
|                                                   |                                                                                                                                     |                                                                                                                          |                                                        |     |     |     |     |     |       |              |                          | <a href="#">DEHA0E23210g</a> | highly similar to CA4084CaTPS1 Candida albicans CaTPS1 TREHALOSE-6-PHOSPHATE SYNTHASE, start by similarity                                                                                                                     |
|                                                   |                                                                                                                                     |                                                                                                                          |                                                        |     |     |     |     |     |       |              |                          | <a href="#">CAGL0H02387g</a> | similar to splP38426 Saccharomy cerevisiae YMR261c TPS3alpha splP38427 Saccharomyces cerevisiae YML100w TSL1, start by similarity                                                                                              |
| <a href="#">CAGL0G05335g</a>                      | highly similar to splP31688 Saccharomyces cerevisiae YDR074w TPS2 alpha, alpha-trehalose-phosph synthase, hypothetical start        |                                                                                                                          |                                                        |     |     |     |     |     |       |              |                          |                              |                                                                                                                                                                                                                                |

|                                |                          |                                                                                                                            |        |     |     |     |     |     |       |           |  |                          |                              |                                                                                                                                 |                              |                                                                                                                                                                                                                        |
|--------------------------------|--------------------------|----------------------------------------------------------------------------------------------------------------------------|--------|-----|-----|-----|-----|-----|-------|-----------|--|--------------------------|------------------------------|---------------------------------------------------------------------------------------------------------------------------------|------------------------------|------------------------------------------------------------------------------------------------------------------------------------------------------------------------------------------------------------------------|
| <a href="#">YML100w</a>        |                          | trehalose-phosphate synthase, 123 KD subunit P4.6.f4.1                                                                     |        |     |     |     |     |     |       |           |  |                          |                              |                                                                                                                                 | <a href="#">CAGL0G05335g</a> | TPS2 alpha, alpha-trehalose-phosphatase, hypothetical start                                                                                                                                                            |
|                                |                          |                                                                                                                            |        |     |     |     |     |     |       |           |  |                          |                              |                                                                                                                                 | <a href="#">KLLA0B08822g</a> | gi1586113 sp Q07158 TPS1_KLU Kluyveromyces lactis Alpha, alpha-trehalose-phosphate synthase [UDP-forming] 56 kDa subunit (Trehalose-phosphate synthase) (UDP-glucosephosphate glucosyltransferase) start by similarity |
|                                |                          |                                                                                                                            |        |     |     |     |     |     |       |           |  |                          |                              |                                                                                                                                 | <a href="#">YAL10E14685g</a> | sp O74932 Yarrowia lipolytica Alpha-trehalose-phosphate synthase [UDP-forming], identified start                                                                                                                       |
|                                |                          |                                                                                                                            |        |     |     |     |     |     |       |           |  |                          |                              |                                                                                                                                 | <a href="#">DEHA0F07392g</a> | similar to CA5505 Ca TPS3.3 Candida albicans CaTPS3.3 alpha, alpha-trehalose-phosphate synthase, regulatory subunit, 3-prime end (by homology) hypothetical start                                                      |
|                                |                          |                                                                                                                            |        |     |     |     |     |     |       |           |  |                          |                              |                                                                                                                                 | <a href="#">YAL10E31086g</a> | similar to tr Q9P918 Pichia angustata Trehalose phosphate synthase subunit, hypothetical start                                                                                                                         |
|                                |                          |                                                                                                                            |        |     |     |     |     |     |       |           |  |                          |                              |                                                                                                                                 | <a href="#">KLLA0E10120g</a> | similar to splP31688 Saccharomyces cerevisiae YDR074w TPS2 alpha, alpha-trehalose-phosphate synthase, 102 kDa subunit, start by similarity                                                                             |
|                                |                          |                                                                                                                            |        |     |     |     |     |     |       |           |  |                          |                              |                                                                                                                                 | <a href="#">DEHA0G13233g</a> | similar to CA5066 Ca TPS2 Candida albicans CaTPS2, hypothetical start                                                                                                                                                  |
|                                |                          |                                                                                                                            |        |     |     |     |     |     |       |           |  |                          |                              |                                                                                                                                 | <a href="#">KLLA0E11231g</a> | similar to splP38426 Saccharomyces cerevisiae YMR261c TPS3 alpha, alpha-trehalose-phosphate synthase, 115 kDa subunit, start by similarity                                                                             |
|                                |                          |                                                                                                                            |        |     |     |     |     |     |       |           |  |                          |                              |                                                                                                                                 | <a href="#">CAGL0I09812g</a> | highly similar to splQ00764 Saccharomyces cerevisiae YBR120c TPS1 alpha, alpha-trehalose-phosphate synthase, hypothetical start                                                                                        |
|                                |                          |                                                                                                                            |        |     |     |     |     |     |       |           |  |                          |                              |                                                                                                                                 | <a href="#">CAGL0I06468g</a> | similar to splP38426 Saccharomyces cerevisiae YMR261c TPS3 or splP31688 Saccharomyces cerevisiae YML100w TSL1, hypothetical start                                                                                      |
|                                |                          |                                                                                                                            |        |     |     |     |     |     |       |           |  |                          |                              |                                                                                                                                 | <a href="#">YAL10D14476g</a> | similar to splP31688 Saccharomyces cerevisiae YDR074w TPS2 alpha, alpha-trehalose-phosphate synthase, 102 kDa subunit, (trehalose 6-P phosphatase activity), start by similarity                                       |
|                                |                          |                                                                                                                            |        |     |     |     |     |     |       |           |  |                          |                              |                                                                                                                                 | <a href="#">DEHA0E23210g</a> | highly similar to CA4084 Ca TPS1 Candida albicans CaTPS1 TREHALOSE-6-PHOSPHATASE SYNTHASE, start by similarity                                                                                                         |
|                                |                          |                                                                                                                            |        |     |     |     |     |     |       |           |  |                          |                              |                                                                                                                                 | <a href="#">CAGL0H02387g</a> | similar to splP38426 Saccharomyces cerevisiae YMR261c TPS3alpha splP38427 Saccharomyces cerevisiae YML100w TSL1, start by similarity                                                                                   |
| <a href="#">TPS3 (YMR261C)</a> | <a href="#">2.4.1.15</a> | <p>splP38426 Saccharomyces cerevisiae YMR261c TPS3 alpha, alpha-trehalose-phosphate synthase, 115 KD subunit P4.6.f4.1</p> | viable | 0.3 | 0.4 | Ess | Ess | 0.2 | sekdy | 4 4 3 3 3 |  | <a href="#">GLR.1979</a> | <a href="#">CAGL0G05335g</a> | highly similar to splP31688 Saccharomyces cerevisiae YDR074w TPS2 alpha, alpha-trehalose-phosphate synthase, hypothetical start |                              |                                                                                                                                                                                                                        |
|                                |                          |                                                                                                                            |        |     |     |     |     |     |       |           |  |                          |                              |                                                                                                                                 | <a href="#">KLLA0B08822g</a> | gi1586113 sp Q07158 TPS1_KLU Kluyveromyces lactis Alpha, alpha-trehalose-phosphate synthase [UDP-forming] 56 kDa subunit (Trehalose-phosphate synthase) (UDP-glucosephosphate glucosyltransferase) start by similarity |
|                                |                          |                                                                                                                            |        |     |     |     |     |     |       |           |  |                          |                              |                                                                                                                                 | <a href="#">YAL10E14685g</a> | sp O74932 Yarrowia lipolytica Alpha-trehalose-phosphate synthase [UDP-forming], identified start                                                                                                                       |
|                                |                          |                                                                                                                            |        |     |     |     |     |     |       |           |  |                          |                              |                                                                                                                                 | <a href="#">DEHA0F07392g</a> | similar to CA5505 Ca TPS3.3 Candida albicans CaTPS3.3 alpha, alpha-trehalose-phosphate synthase, regulatory subunit, 3-prime end (by homology) hypothetical start                                                      |
|                                |                          |                                                                                                                            |        |     |     |     |     |     |       |           |  |                          |                              |                                                                                                                                 | <a href="#">YAL10E31086g</a> | similar to tr Q9P918 Pichia angustata Trehalose phosphate synthase subunit, hypothetical start                                                                                                                         |
|                                |                          |                                                                                                                            |        |     |     |     |     |     |       |           |  |                          |                              |                                                                                                                                 | <a href="#">KLLA0E10120g</a> | similar to splP31688 Saccharomyces cerevisiae YDR074w TPS2 alpha, alpha-trehalose-phosphate synthase, 102 kDa subunit, start by similarity                                                                             |



|                                |                          |                                                                                                                         |        |     |     |     |     |     |       |              |                          |                              |                                                                                                                                                                                                                                        |
|--------------------------------|--------------------------|-------------------------------------------------------------------------------------------------------------------------|--------|-----|-----|-----|-----|-----|-------|--------------|--------------------------|------------------------------|----------------------------------------------------------------------------------------------------------------------------------------------------------------------------------------------------------------------------------------|
|                                |                          |                                                                                                                         |        |     |     |     |     |     |       |              |                          | <a href="#">KLLA0E10120g</a> | trehalose-phosphate synthase, 102 subunit, start by similarity                                                                                                                                                                         |
|                                |                          |                                                                                                                         |        |     |     |     |     |     |       |              |                          | <a href="#">DEHA0G13233g</a> | similar to CA5066iCaTPS2 Candida albicans CaTPS2, hypothetical start                                                                                                                                                                   |
| <a href="#">GSY1 (YFR015C)</a> | <a href="#">2.4.1.11</a> | splP23337<br>Saccharomyces cerevisiae YFR015c<br>GSY1 UDP glucose--starch glucosyltransferase, isoform 1<br>P2.249.f2.1 | viable | 0.7 | 0.7 | 0.9 | 0.9 | 0.7 | sckdy | 2 2 1 1<br>1 | <a href="#">GLR.110</a>  | <a href="#">YALI0E18502g</a> | similar to splP23337 Saccharomyces cerevisiae YFR015c GSY1 UDP glucose--starch glucosyltransferase isoform 1 or splP27472 Saccharomyces cerevisiae YLR258w GSY2 UDP glucose--starch glucosyltransferase isoform 2, start by similarity |
|                                |                          |                                                                                                                         |        |     |     |     |     |     |       |              |                          | <a href="#">CAGL0F04719g</a> | highly similar to splP27472 Saccharomyces cerevisiae YLR258w GSY2 UDP-glucose--starch glucosyltransferase, start by similarity                                                                                                         |
|                                |                          |                                                                                                                         |        |     |     |     |     |     |       |              |                          | <a href="#">DEHA0B05764g</a> | highly similar to splP23337 Saccharomyces cerevisiae YFR015c GSY1 UDP glucose--starch glucosyltransferase, isoform 1, start by similarity                                                                                              |
|                                |                          |                                                                                                                         |        |     |     |     |     |     |       |              |                          | <a href="#">KLLA0E23133g</a> | highly similar to splP23337 Saccharomyces cerevisiae YFR015c GSY1 UDP glucose--starch glucosyltransferase, isoform 1, start by similarity                                                                                              |
|                                |                          |                                                                                                                         |        |     |     |     |     |     |       |              |                          | <a href="#">CAGL0K10626g</a> | highly similar to splP23337 Saccharomyces cerevisiae YFR015c GSY1, start by similarity                                                                                                                                                 |
| <a href="#">GSY2 (YLR258W)</a> | <a href="#">2.4.1.11</a> | splP27472<br>Saccharomyces cerevisiae YLR258w<br>GSY2 UDP-glucose--starch glucosyltransferase, isoform 2<br>P2.249.f2.1 | viable | NA  | NA  | NA  | NA  | NA  | sckdy | 2 2 1 1<br>1 | <a href="#">GLR.110</a>  | <a href="#">YALI0E18502g</a> | similar to splP23337 Saccharomyces cerevisiae YFR015c GSY1 UDP glucose--starch glucosyltransferase isoform 1 or splP27472 Saccharomyces cerevisiae YLR258w GSY2 UDP glucose--starch glucosyltransferase isoform 2, start by similarity |
|                                |                          |                                                                                                                         |        |     |     |     |     |     |       |              |                          | <a href="#">CAGL0F04719g</a> | highly similar to splP27472 Saccharomyces cerevisiae YLR258w GSY2 UDP-glucose--starch glucosyltransferase, start by similarity                                                                                                         |
|                                |                          |                                                                                                                         |        |     |     |     |     |     |       |              |                          | <a href="#">DEHA0B05764g</a> | highly similar to splP23337 Saccharomyces cerevisiae YFR015c GSY1 UDP glucose--starch glucosyltransferase, isoform 1, start by similarity                                                                                              |
|                                |                          |                                                                                                                         |        |     |     |     |     |     |       |              |                          | <a href="#">KLLA0E23133g</a> | highly similar to splP23337 Saccharomyces cerevisiae YFR015c GSY1 UDP glucose--starch glucosyltransferase, isoform 1, start by similarity                                                                                              |
|                                |                          |                                                                                                                         |        |     |     |     |     |     |       |              |                          | <a href="#">CAGL0K10626g</a> | highly similar to splP23337 Saccharomyces cerevisiae YFR015c GSY1, start by similarity                                                                                                                                                 |
| <a href="#">PGM1 (YKL127W)</a> | <a href="#">5.4.2.2</a>  | splP33401<br>Saccharomyces cerevisiae YKL127w<br>PGM1 phosphoglucomutase, minor isoform<br>P2.202.f2.1                  | viable | 0.9 | Non | Non | Non | Non | sckdy | 2 2 1 1<br>1 | <a href="#">GLR.2142</a> | <a href="#">YALI0E02090g</a> | similar to splP37012 Saccharomyces cerevisiae YMR105c PGM2 phosphoglucomutase, major isoform or splP33401 Saccharomyces cerevisiae YKL127w PGM1 phosphoglucomutase minor isoform, start by similarity                                  |
|                                |                          |                                                                                                                         |        |     |     |     |     |     |       |              |                          | <a href="#">DEHA0C05940g</a> | highly similar to splP37012 Saccharomyces cerevisiae YMR105c PGM2 phosphoglucomutase or splP33401 Saccharomyces cerevisiae YKL127w PGM1 phosphoglucomutase start by similarity                                                         |
|                                |                          |                                                                                                                         |        |     |     |     |     |     |       |              |                          | <a href="#">KLLA0B12694g</a> | highly similar to splP37012 Saccharomyces cerevisiae YMR105c PGM2 phosphoglucomutase, major isoform, start by similarity                                                                                                               |
|                                |                          |                                                                                                                         |        |     |     |     |     |     |       |              |                          | <a href="#">CAGL0K03421g</a> | highly similar to splP37012 Saccharomyces cerevisiae YMR105c Phosphoglucomutase 2, start by similarity                                                                                                                                 |
|                                |                          |                                                                                                                         |        |     |     |     |     |     |       |              |                          | <a href="#">CAGL0K07480g</a> | highly similar to splP37012 Saccharomyces cerevisiae YMR105c PGM2 phosphoglucomutase, hypothetical start                                                                                                                               |

|                                |                         |                                                                                               |                                                                 |     |     |     |     |    |       |              |                          |                              |                                                                                                                                                                                                    |
|--------------------------------|-------------------------|-----------------------------------------------------------------------------------------------|-----------------------------------------------------------------|-----|-----|-----|-----|----|-------|--------------|--------------------------|------------------------------|----------------------------------------------------------------------------------------------------------------------------------------------------------------------------------------------------|
| <a href="#">PGM2 (YMR105C)</a> | <a href="#">5.4.2.2</a> | splP37012 Saccharomyces cerevisiae YMR105c PGM2 phosphoglucomutase, major isoform P2.202.f2.1 | Exhibits sensitivity at 15 generations when grown in galactose. | 0.6 | 0.1 | Ess | 0.7 | ND | sckdy | 2 2 1 1<br>1 | <a href="#">GLR.2142</a> | <a href="#">YAL10E02090g</a> | similar to splP37012 Saccharomyces cerevisiae YMR105c PGM2 phosphoglucomutase, major isoform splP33401 Saccharomyces cerevisiae YKL127w PGM1 phosphoglucomutase minor isoform, start by similarity |
|                                |                         |                                                                                               |                                                                 |     |     |     |     |    |       |              |                          | <a href="#">DEHA0C05940g</a> | highly similar to splP37012 Saccharomyces cerevisiae YMR105c PGM2 phosphoglucomutase or splP33401 Saccharomyces cerevisiae YKL127w PGM1 phosphoglucomutase start by similarity                     |
|                                |                         |                                                                                               |                                                                 |     |     |     |     |    |       |              |                          | <a href="#">KLLA0B12694g</a> | highly similar to splP37012 Saccharomyces cerevisiae YMR105c PGM2 phosphoglucomutase, major isoform, start by similarity                                                                           |
|                                |                         |                                                                                               |                                                                 |     |     |     |     |    |       |              |                          | <a href="#">CAGL0K03421g</a> | highly similar to splP37012 Saccharomyces cerevisiae YMR105c Phosphoglucomutase 2, start by similarity                                                                                             |
|                                |                         |                                                                                               |                                                                 |     |     |     |     |    |       |              |                          | <a href="#">CAGL0K07480g</a> | highly similar to splP37012 Saccharomyces cerevisiae YMR105c PGM2 phosphoglucomutase, hypothetical start                                                                                           |
| <a href="#">GLK1 (YCL040W)</a> | <a href="#">2.7.1.2</a> | splP17709 Saccharomyces cerevisiae YCL040w GLK1 aldohexose specific glucokinase P4.22.f4.1    | viable                                                          | NA  | NA  | NA  | NA  | NA | sckdy | 5 5 2 3<br>3 | <a href="#">GLR.3217</a> | <a href="#">YAL10E15488g</a> | similar to splP17709 Saccharomyces cerevisiae YCL040w GLK1 aldohexose specific glucokinase, hypothetical start                                                                                     |
|                                |                         |                                                                                               |                                                                 |     |     |     |     |    |       |              |                          | <a href="#">CAGL0A04829g</a> | highly similar to splP04807 Saccharomyces cerevisiae YGL25 HXK2 or splP04806 Saccharomyces cerevisiae YFR053c HXK1, start by similarity                                                            |
|                                |                         |                                                                                               |                                                                 |     |     |     |     |    |       |              |                          | <a href="#">DEHA0F26092g</a> | similar to trlQ9C0M1 Candida albicans CaNAG5 protein, hypothetical start                                                                                                                           |
|                                |                         |                                                                                               |                                                                 |     |     |     |     |    |       |              |                          | <a href="#">CAGL0M00682g</a> | similar to trlQ06204 Saccharomyces cerevisiae YLR446w, hypothetical start                                                                                                                          |
|                                |                         |                                                                                               |                                                                 |     |     |     |     |    |       |              |                          | <a href="#">CAGL0F00605g</a> | highly similar to splP17709 Saccharomyces cerevisiae YCL040w GLK1 or Q04409 Saccharomyces cerevisiae YDR516c, start by similarity                                                                  |
|                                |                         |                                                                                               |                                                                 |     |     |     |     |    |       |              |                          | <a href="#">CAGL0B00726g</a> | weakly similar to splP17709 Saccharomyces cerevisiae YCL040w GLK1 aldohexose specific glucokinase start by similarity                                                                              |
|                                |                         |                                                                                               |                                                                 |     |     |     |     |    |       |              |                          | <a href="#">YAL10E20207g</a> | weakly similar to trlQ9C0M1 Candida albicans CaNAG5 protein, hypothetical start                                                                                                                    |
|                                |                         |                                                                                               |                                                                 |     |     |     |     |    |       |              |                          | <a href="#">DEHA0F15169g</a> | highly similar to splP50506 Debaryomyces occidentalis Hexokinase (EC 2.7.1.1), start by similarity                                                                                                 |
|                                |                         |                                                                                               |                                                                 |     |     |     |     |    |       |              |                          | <a href="#">KLLA0C01155g</a> | similar to splP17709 Saccharomyces cerevisiae YCL040w GLK1 aldohexose specific glucokinase, start by similarity                                                                                    |
|                                |                         |                                                                                               |                                                                 |     |     |     |     |    |       |              |                          | <a href="#">CAGL0H07579g</a> | highly similar to splP04807 Saccharomyces cerevisiae YGL25 HXK2 or splP04806 Saccharomyces cerevisiae YFR053c HXK1, start by similarity                                                            |
|                                |                         |                                                                                               |                                                                 |     |     |     |     |    |       |              |                          | <a href="#">KLLA0D11352g</a> | gil462368 splP33284 HXK_KLUYVEROMYCES LACTIS HEXOKINASE start by similarity                                                                                                                        |
|                                |                         |                                                                                               |                                                                 |     |     |     |     |    |       |              |                          | <a href="#">YAL10B22308g</a> | highly similar to trlO74996 Yarrowia lipolytica Hexokinase, hypothetical start                                                                                                                     |
|                                |                         |                                                                                               |                                                                 |     |     |     |     |    |       |              |                          | <a href="#">DEHA0E07007g</a> | highly similar to CA0263 CaGLK1 Candida albicans aldohexose specific glucokinase, start by similarity                                                                                              |
| <a href="#">PGII</a>           | <a href="#">5 3 1 0</a> | splP12709 Saccharomyces cerevisiae YBR196c                                                    | viable                                                          | NA  | NA  | NA  | NA  | NA | sckdy | 1 1 1 1      | <a href="#">GLR.582</a>  | <a href="#">KLLA0E23595g</a> | gil120740 splP12341 G6PI_KLUYVEROMYCES LACTIS Glucose-6-phosphate isomerase (GPI) (Phosphoglucose isomerase) (PGI) (Phosphohexose isomerase) (PHI), start by similarity                            |
|                                |                         |                                                                                               |                                                                 |     |     |     |     |    |       |              |                          | <a href="#">CAGL0H05445g</a> | highly similar to splP12709 Saccharomyces cerevisiae YBR196c PGI1 hypothetical start                                                                                                               |

|                                |                          |                                                                                                                  |          |     |     |     |     |     |     |     |     |           |                          |                              |                                                                                                                                                                                |
|--------------------------------|--------------------------|------------------------------------------------------------------------------------------------------------------|----------|-----|-----|-----|-----|-----|-----|-----|-----|-----------|--------------------------|------------------------------|--------------------------------------------------------------------------------------------------------------------------------------------------------------------------------|
| <a href="#">(YBR196C)</a>      | <a href="#">2.3.1.2</a>  | PGI1 glucose-6-phosphate isomerase singleton                                                                     | inviable | NA  | 1         | <a href="#">GLR.794</a>  | <a href="#">DEHA0F14289g</a> | highly similar to spP12709 Saccharomyces cerevisiae YBR196C PGI1 glucose-6-phosphate isomerase hypothetical start                                                              |
|                                |                          |                                                                                                                  |          |     |     |     |     |     |     |     |     |           |                          | <a href="#">YALI0F07711g</a> | highly similar to spP12709 Saccharomyces cerevisiae YBR196C PGI1 glucose-6-phosphate isomerase start by similarity                                                             |
| <a href="#">(GLC3 YEL011W)</a> | <a href="#">2.4.1.18</a> | spP32775 Saccharomyces cerevisiae YEL011w GLC3 1,4-glucan branching enzyme (glycogen branching enzyme) singleton | viable   | 0.7 | Non | 0.6 | 0.8 | 0.6 | 0.6 | 0.6 | 0.6 | 1 1 1 1 1 | <a href="#">GLR.790</a>  | <a href="#">CAGL0M03377g</a> | highly similar to spP32775 Saccharomyces cerevisiae YEL011w GLC3, hypothetical start                                                                                           |
|                                |                          |                                                                                                                  |          |     |     |     |     |     |     |     |     |           |                          | <a href="#">DEHA0B01650g</a> | similar to spP32775 Saccharomyces cerevisiae YEL011w GLC3 1,4-glucan branching enzyme (glycogen branching enzyme), hypothetical start                                          |
|                                |                          |                                                                                                                  |          |     |     |     |     |     |     |     |     |           |                          | <a href="#">KLLA0A11176g</a> | highly similar to spP32775 Saccharomyces cerevisiae YEL011w GLC3 1,4-glucan branching enzyme (glycogen branching enzyme) singleton start by similarity                         |
|                                |                          |                                                                                                                  |          |     |     |     |     |     |     |     |     |           |                          | <a href="#">YALI0C06798g</a> | highly similar to trlQ9P5P3 Neurospora crassa Probable branching enzyme (glycogen branching enzyme) hypothetical start                                                         |
| <a href="#">(NTH2 YBR001C)</a> | <a href="#">3.2.1.28</a> | spP35172 Saccharomyces cerevisiae YBR001c NTH2 alpha,alpha-trehalase P2.445.f2.1                                 | viable   | 0.5 | 0.2 | 0.6 | 0.5 | 0.6 | 0.6 | 0.6 | 0.6 | 2 2 1 1 1 | <a href="#">GLR.157</a>  | <a href="#">DEHA0B02673g</a> | similar to spP52494 Candida albicans Neutral trehalase (EC 3.2.1.28), start by similarity                                                                                      |
|                                |                          |                                                                                                                  |          |     |     |     |     |     |     |     |     |           |                          | <a href="#">CAGL0M10439g</a> | highly similar to spP32356 Saccharomyces cerevisiae YDR001c NTH1 neutral trehalase or spP35172 Saccharomyces cerevisiae YBR001c NTH2, hypothetical start                       |
|                                |                          |                                                                                                                  |          |     |     |     |     |     |     |     |     |           |                          | <a href="#">YALI0D15598g</a> | similar to spP32356 Saccharomyces cerevisiae YDR001c NTH1 neutral trehalase, hypothetical start                                                                                |
|                                |                          |                                                                                                                  |          |     |     |     |     |     |     |     |     |           |                          | <a href="#">KLLA0E17325g</a> | gil1351293 spP49381 ITREA_KLUYVEROMYCES LACTIS NEUTRAL TREHALASE (ALPHA, ALPHA-TREHALASE) (ALPHA, ALPHA-TREHALASE) (ALPHA, ALPHA-TREHALOSE GLUCOHYDROLASE) start by similarity |
|                                |                          |                                                                                                                  |          |     |     |     |     |     |     |     |     |           |                          | <a href="#">CAGL0C04323g</a> | similar to spP32356 Saccharomyces cerevisiae YDR001c NTH1 neutral trehalase, hypothetical start                                                                                |
| <a href="#">(NTH1 YDR001C)</a> | <a href="#">3.2.1.28</a> | spP32356 Saccharomyces cerevisiae YDR001c NTH1 neutral trehalase (alpha,alpha-trehalase) P2.445.f2.1             | viable   | Ess | Ess | Ess | 0.1 | Ess | Ess | Ess | Ess | 2 2 1 1 1 | <a href="#">GLR.157</a>  | <a href="#">DEHA0B02673g</a> | similar to spP52494 Candida albicans Neutral trehalase (EC 3.2.1.28), start by similarity                                                                                      |
|                                |                          |                                                                                                                  |          |     |     |     |     |     |     |     |     |           |                          | <a href="#">CAGL0M10439g</a> | highly similar to spP32356 Saccharomyces cerevisiae YDR001c NTH1 neutral trehalase or spP35172 Saccharomyces cerevisiae YBR001c NTH2, hypothetical start                       |
|                                |                          |                                                                                                                  |          |     |     |     |     |     |     |     |     |           |                          | <a href="#">YALI0D15598g</a> | similar to spP32356 Saccharomyces cerevisiae YDR001c NTH1 neutral trehalase, hypothetical start                                                                                |
|                                |                          |                                                                                                                  |          |     |     |     |     |     |     |     |     |           |                          | <a href="#">KLLA0E17325g</a> | gil1351293 spP49381 ITREA_KLUYVEROMYCES LACTIS NEUTRAL TREHALASE (ALPHA, ALPHA-TREHALASE) (ALPHA, ALPHA-TREHALASE) (ALPHA, ALPHA-TREHALOSE GLUCOHYDROLASE) start by similarity |
|                                |                          |                                                                                                                  |          |     |     |     |     |     |     |     |     |           |                          | <a href="#">CAGL0C04323g</a> | similar to spP32356 Saccharomyces cerevisiae YDR001c NTH1 neutral trehalase, hypothetical start                                                                                |
| <a href="#">(ATH1 YPR026W)</a> | <a href="#">3.2.1.28</a> | spP48016 Saccharomyces cerevisiae YPR026w ATH1 acid trehalase, vacuolar singleton                                | viable   | 0.7 | 0.9 | 0.7 | 0.5 | 0.5 | 0.5 | 0.5 | 0.5 | 1 1 1 1 0 | <a href="#">GLR.1078</a> | <a href="#">KLLA0E06622g</a> | similar to spP48016 Saccharomyces cerevisiae YPR026w ATH1 acid trehalase, vacuolar singleton, hypothetical start                                                               |
|                                |                          |                                                                                                                  |          |     |     |     |     |     |     |     |     |           |                          | <a href="#">CAGL0K05137g</a> | similar to spP48016 Saccharomyces cerevisiae YPR026w Vacuolar acid trehalase precursor, hypothetical start                                                                     |
|                                |                          |                                                                                                                  |          |     |     |     |     |     |     |     |     |           |                          | <a href="#">DEHA0D15774g</a> | similar to CA2574 CaATH1 Candida albicans CaATH1 acid trehalase, vacuolar, hypothetical start                                                                                  |
|                                |                          |                                                                                                                  |          |     |     |     |     |     |     |     |     |           |                          |                              | similar to CA3841 IPF16640 Candida albicans IPF16640 acid trehalase, vacuolar, hypothetical start                                                                              |

|                              |                                                                                                                                      |
|------------------------------|--------------------------------------------------------------------------------------------------------------------------------------|
| <a href="#">DEHA0G07777g</a> | albicans IPF16640 unknown function<br>hypothetical start                                                                             |
| <a href="#">KLLA0E24959g</a> | no similarity, hypothetical start                                                                                                    |
| <a href="#">KLLA0C05016g</a> | some similarities with sgdIS00059<br>Saccharomyces cerevisiae YOR388<br>hypothetical protein, hypothetical start                     |
| <a href="#">DEHA0C12155g</a> | some similarities with trIQ1221<br>Saccharomyces cerevisiae YOR009<br>start, frameshift                                              |
| <a href="#">DEHA0F20570g</a> | weakly similar to CA4243IIPF164<br>Candida albicans IPF16491, hypothetical<br>start                                                  |
| <a href="#">YALI0D08140g</a> | similar to splP36110 Saccharomyces<br>cerevisiae YKR013w PRY2 protein<br>precursor (Pathogen related in Sc 2)<br>by similarity       |
| <a href="#">DEHA0F27148g</a> | similar to CA1909IIPF20091 Candida<br>albicans IPF20091, hypothetical start                                                          |
| <a href="#">CAGL0C05665g</a> | some similarities with splP3617<br>Saccharomyces cerevisiae YKR10<br>FLO10, no start, frameshift                                     |
| <a href="#">KLLA0A04367g</a> | some similarities with sgdIS00059<br>Saccharomyces cerevisiae YOR388<br>hypothetical protein, hypothetical start                     |
| <a href="#">YALI0B18568g</a> | no similarity, hypothetical start                                                                                                    |
| <a href="#">DEHA0D16907g</a> | similar to CA0605ICaUTR2 Candida<br>albicans CaUTR2, hypothetical start                                                              |
| <a href="#">CAGL0J11913g</a> | some similarities with splP0864<br>Saccharomyces cerevisiae YIR01<br>STA1, no start, frameshift                                      |
| <a href="#">CAGL0L03289g</a> | similar to splP46955 Saccharomyces<br>cerevisiae YJL116c NCA3 or splP3<br>Saccharomyces cerevisiae YKR04<br>UTH1, hypothetical start |
| <a href="#">YALI0D13255g</a> | No Similarity, Hypothetical Start                                                                                                    |
| <a href="#">KLLA0D02420g</a> | some similarities with splP36110<br>Saccharomyces cerevisiae YKR01<br>PRY2, hypothetical start                                       |
| <a href="#">CAGL0J08910g</a> | similar to trIQ05790 Saccharomyces<br>cerevisiae YLR213c CRR1, hypothetical<br>start                                                 |
| <a href="#">KLLA0F04433g</a> | similar to splP53616 Saccharomyces<br>cerevisiae YNL066w SUN4, start<br>similarity                                                   |
| <a href="#">CAGL0G04125g</a> | weakly similar to splP20840<br>Saccharomyces cerevisiae YJR00<br>SAG1 alpha-agglutinin, hypothetical<br>start                        |
| <a href="#">YALI0A00506g</a> | weakly similar to splP43633<br>Saccharomyces cerevisiae YGL02<br>ALK1 DNA damage-responsive protein<br>hypothetical start            |
| <a href="#">YALI0C21186g</a> | no similarity, hypothetical start                                                                                                    |
| <a href="#">CAGL0G03421g</a> | some similarities with splP0864<br>Saccharomyces cerevisiae YIR01<br>STA1, hypothetical start                                        |
| <a href="#">CAGL0D02530g</a> | weakly similar to splP42835<br>Saccharomyces cerevisiae YNL32<br>EGT2 cell-cycle regulation protein<br>hypothetical start            |
| <a href="#">YALI0B14795g</a> | some similarities with splP4055<br>Saccharomyces cerevisiae Cell wall<br>protein TIR3 precursor, hypothetical<br>start               |
| <a href="#">YALI0E34463g</a> | some similarities with wilNCU066<br>Neurospora crassa NCU06697.<br>hypothetical protein (67439 - 6977)<br>hypothetical start         |
| <a href="#">DEHA0F22803g</a> | weakly similar to CA4237IIPF63<br>Candida albicans IPF6375, hypothetical<br>start                                                    |
| <a href="#">YALI0E08008g</a> | weakly similar to trIQ08294<br>Saccharomyces cerevisiae YOL15<br>hypothetical start                                                  |

|                              |                                                                                                                                                                                |
|------------------------------|--------------------------------------------------------------------------------------------------------------------------------------------------------------------------------|
| <a href="#">DEHA0C15092g</a> | highly similar to splP36135 Saccharomyces cerevisiae YKR04 UTH1, start by similarity                                                                                           |
| <a href="#">KLLA0E24937g</a> | no similarity, hypothetical start                                                                                                                                              |
| <a href="#">CAGL0H09592g</a> | highly similar to splP10863 Saccharomyces cerevisiae YER01 TIR1 or splP33890 Saccharomyces cerevisiae YOR010c TIR2, start by similarity                                        |
| <a href="#">YALI0E19635g</a> | no similarity, hypothetical start                                                                                                                                              |
| <a href="#">YALI0A07601g</a> | weakly similar to splP08640 Saccharomyces cerevisiae YIR01 STA1 extracellular alpha-1, 4-glucosidase, hypothetical start                                                       |
| <a href="#">YALI0F02343g</a> | weakly similar to trIO42970 Schizosaccharomyces pombe SPBC1E8.05 Serine rich protein, start by similarity                                                                      |
| <a href="#">KLLA0F04906g</a> | some similarities with sgdI50004 Saccharomyces cerevisiae YLR21 CRR1, hypothetical start                                                                                       |
| <a href="#">YALI0C14630g</a> | weakly similar to splQ04893 Saccharomyces cerevisiae YMR31 hypothetical start                                                                                                  |
| <a href="#">YALI0C08349g</a> | Weakly similar to splP08640 Saccharomyces cerevisiae YIR01 STA1 extracellular alpha-1,4-glucosidase, 5 end                                                                     |
| <a href="#">YALI0A18381g</a> | no similarity, hypothetical start                                                                                                                                              |
| <a href="#">YALI0C09680g</a> | similar to splP53301 Saccharomyces cerevisiae YGR189c CRH1 family putative glycosidases might exert a common role in cell wall organization, start by similarity               |
| <a href="#">DEHA0G22066g</a> | some similarities with splP53301 Saccharomyces cerevisiae YGR189c CRH1 family of putative glycosidases might exert a common role in cell wall organization, hypothetical start |
| <a href="#">YALI0E18700g</a> | no similarity, hypothetical start                                                                                                                                              |
| <a href="#">YALI0D26257g</a> | weakly similar to splP08640 Saccharomyces cerevisiae YIR01 STA1 extracellular alpha-1,4-glucosidase, hypothetical start                                                        |
| <a href="#">CAGL0A00231g</a> | similar to splP43633 Saccharomyces cerevisiae YGL021w ALK1 DN damage-responsive protein, hypothetical start                                                                    |
| <a href="#">CAGL0G05896g</a> | similar to splP38844 Saccharomyces cerevisiae YHR143w, start by similarity                                                                                                     |
| <a href="#">CAGL0K09130g</a> | some similarities with trIQ0867 Saccharomyces cerevisiae YOR24 SRL1, hypothetical start                                                                                        |
| <a href="#">KLLA0C04928g</a> | no similarity, hypothetical start                                                                                                                                              |
| <a href="#">DEHA0C05566g</a> | similar to splP53832 Saccharomyces cerevisiae YNL283c WSC2 glucoamylase III, hypothetical start                                                                                |
| <a href="#">DEHA0B02222g</a> | weakly similar to splP08640 Saccharomyces cerevisiae YIR01 STA1 extracellular alpha-1,4-glucosidase, hypothetical start                                                        |
| <a href="#">YALI0E15015g</a> | no similarity, hypothetical start                                                                                                                                              |
| <a href="#">CAGL0C00209g</a> | some similarities with splP4717 Saccharomyces cerevisiae YJR15 hypothetical start                                                                                              |
| <a href="#">DEHA0E10109g</a> | similar to splQ04893 Saccharomyces cerevisiae YMR317w similarity mucins, glucan 1, 4-alpha-glucosidase and exo-alpha-sialidase, hypothetical start                             |
| <a href="#">YALI0D21230g</a> | some similarities with trIQ0065 Emericella nidulans F1bD, hypothetical start                                                                                                   |

|                                                   |                         |                                                                                                |        |    |    |    |    |    |       |                      |
|---------------------------------------------------|-------------------------|------------------------------------------------------------------------------------------------|--------|----|----|----|----|----|-------|----------------------|
| <a href="#">BSC1</a><br><a href="#">(YDL037C)</a> | <a href="#">3.2.1.3</a> | Saccharomyces cerevisiae YDL037c strong similarity to glucan 1,4-alpha-glucosidase P2.341.f2.1 | viable | NA | NA | NA | NA | NA | sckdy | 45 35<br>26 36<br>48 |
|---------------------------------------------------|-------------------------|------------------------------------------------------------------------------------------------|--------|----|----|----|----|----|-------|----------------------|

|                              |                                                                                                                                                       |
|------------------------------|-------------------------------------------------------------------------------------------------------------------------------------------------------|
| <a href="#">YALI0F27203g</a> | no similarity, hypothetical start                                                                                                                     |
| <a href="#">YALI0D06149g</a> | similar to splP47032 Saccharomyces cerevisiae YJL079c PRY1 precursor (Pathogen related in Sc 1) by similarity                                         |
| <a href="#">DEHA0F18271g</a> | some similarities with wilNCU069 Neurospora crassa NCU06981.1 hypothetical start                                                                      |
| <a href="#">YALI0C16148g</a> | no similarity, hypothetical start                                                                                                                     |
| <a href="#">KLLA0E14982g</a> | similar to splP36135 Saccharomyces cerevisiae YKR042w UTH1 involved in the aging process, start by similarity                                         |
| <a href="#">YALI0F10175g</a> | no similarity, hypothetical start                                                                                                                     |
| <a href="#">YALI0E04532g</a> | no similarity, hypothetical start                                                                                                                     |
| <a href="#">DEHA0F04158g</a> | similar to CA0076IIPF8866 Candida albicans IPF8866, hypothetical start                                                                                |
| <a href="#">DEHA0G22902g</a> | some similarities with splP53301 Saccharomyces cerevisiae YGR189c CRH1, hypothetical start                                                            |
| <a href="#">DEHA0E03377g</a> | similar to CA4245IIPF4303 Candida albicans IPF4303 unknown function, hypothetical start                                                               |
| <a href="#">YALI0A00682g</a> | no similarity, hypothetical start                                                                                                                     |
| <a href="#">CAGL0L05434g</a> | similar to splP36135 Saccharomyces cerevisiae YKR042w UTH1 on splP46955 Saccharomyces cerevisiae YJL116c NCA3, hypothetical start                     |
| <a href="#">DEHA0B02266g</a> |                                                                                                                                                       |
| <a href="#">CAGL0C02211g</a> | similar to splP32623 Saccharomyces cerevisiae YEL040w UTR2 cell wall protein, hypothetical start                                                      |
| <a href="#">YALI0F26081g</a> | no similarity, hypothetical start                                                                                                                     |
| <a href="#">DEHA0F14531g</a> | weakly similar to calCA5614IIPF522 Candida albicans IPF522, hypothetical start                                                                        |
| <a href="#">CAGL0A04081g</a> | weakly similar to trIQ05777 Saccharomyces cerevisiae YLR191c hypothetical start                                                                       |
| <a href="#">DEHA0B10868g</a> | some similarities with splP47032 Saccharomyces cerevisiae YJL079c PRY3 closely related to the plant class of pathogen proteins, hypothetical start    |
| <a href="#">KLLA0E10967g</a> | no similarity, hypothetical start                                                                                                                     |
| <a href="#">CAGL0G09449g</a> | similar to splP53301 Saccharomyces cerevisiae YGR189c CRH1, hypothetical start                                                                        |
| <a href="#">DEHA0G02618g</a> | weakly similar to trIQ9Y8F2 Candida albicans Agglutinin-like protein 6, by similarity                                                                 |
| <a href="#">YALI0E18722g</a> | no similarity, hypothetical start                                                                                                                     |
| <a href="#">KLLA0E04939g</a> | some similarities with sgdI50064 Saccharomyces cerevisiae YLR391c Secretory Stress Response protein, hypothetical start                               |
| <a href="#">DEHA0F00638g</a> |                                                                                                                                                       |
| <a href="#">KLLA0B11055g</a> | no similarity, hypothetical start                                                                                                                     |
| <a href="#">DEHA0F22242g</a> | highly similar to CA0883CaSUN41 Candida albicans CaSUN41 Putative cell wall beta-glucosidase (by homology), start by similarity                       |
| <a href="#">KLLA0C17985g</a> | some similarities with splP32333 Saccharomyces cerevisiae YGR011c MSB2 multicopy suppressor of a C. albicans bud emergence defect, hypothetical start |
| <a href="#">YALI0B15510g</a> | similar to splP32623 Saccharomyces cerevisiae YEL040w UTR2 cell wall protein P3.82.f3.1, start by similarity                                          |
| <a href="#">CAGL0F01463g</a> | similar to splP10863 Saccharomyces cerevisiae YER011w TIR1, start by similarity                                                                       |
| <a href="#">DEHA0D05093g</a> | no similarity, hypothetical start                                                                                                                     |

[GLC.1](#)

|                              |                                                                                                                                               |
|------------------------------|-----------------------------------------------------------------------------------------------------------------------------------------------|
| <a href="#">CAGL0C03872g</a> | similar to splP40552 Saccharomyces cerevisiae YIL011w TIR3, start similarity                                                                  |
| <a href="#">DEHA0G15543g</a> | similar to CA3335IIPF8682 Candida albicans IPF8682, hypothetical start                                                                        |
| <a href="#">CAGL0I02530g</a> | some similarities with trlQ1221 Saccharomyces cerevisiae YOR007, hypothetical start                                                           |
| <a href="#">CAGL0I09922g</a> | similar to splP53616 Saccharomyces cerevisiae YNL066w SUN4 or splP40472 Saccharomyces cerevisiae YIL123w SIM1, start by similarity            |
| <a href="#">DEHA0B04213g</a> | similar to splP32334 Saccharomyces cerevisiae YGR014w MSB2 multicopy suppressor of a CDC24 bud emergence defect, hypothetical start           |
| <a href="#">YALI0D19316g</a> | no similarity, hypothetical start                                                                                                             |
| <a href="#">YALIOF27687g</a> | no similarity, hypothetical start                                                                                                             |
| <a href="#">YALIOF20548g</a> | no similarity, hypothetical start                                                                                                             |
| <a href="#">DEHA0C17644g</a> | weakly similar to splP08640 Saccharomyces cerevisiae YIR011w STA1 extracellular alpha-1, 4-glucanase glucosidase, hypothetical start          |
| <a href="#">CAGL0F05137g</a> | similar to splP47032 Saccharomyces cerevisiae YJL079c PRY1, start similarity                                                                  |
| <a href="#">DEHA0B10659g</a> | weakly similar to splP54867 Saccharomyces cerevisiae YOR007 SLG1 required for cell wall integrity for stress response, hypothetical start     |
| <a href="#">CAGL0A03608g</a> | some similarities with trlQ0829 Saccharomyces cerevisiae YOL151w, hypothetical start                                                          |
| <a href="#">KLLA0E19657g</a> | no similarity, hypothetical start                                                                                                             |
| <a href="#">KLLA0E02046g</a> | some similarities with splP4283 Saccharomyces cerevisiae YNL322w EGT2 cell-cycle regulation protein, singleton, hypothetical start            |
| <a href="#">YALI0D02024g</a> | weakly similar to KLLA-IPF5300 Kluyveromyces lactis, hypothetical start                                                                       |
| <a href="#">CAGL0I11902g</a> | some similarities with splP08640 Saccharomyces cerevisiae YIR011w STA1, no start, frameshift                                                  |
| <a href="#">CAGL0G10175g</a> | some similarities with splP4717 Saccharomyces cerevisiae YJR151w, hypothetical start                                                          |
| <a href="#">KLLA0C01496g</a> | some similarities with splP47032 Saccharomyces cerevisiae YJL079c PRY1, hypothetical start                                                    |
| <a href="#">KLLA0C04730g</a> | some similarities with splP2902 Saccharomyces cerevisiae YLR281w CTS1 endochitinase singleton, hypothetical start                             |
| <a href="#">YALIOC20779g</a> | no similarity, hypothetical start                                                                                                             |
| <a href="#">CAGL0G00858g</a> | similar to splP36027 Saccharomyces cerevisiae YLR332w MID2 mating process protein, hypothetical start                                         |
| <a href="#">DEHA0B01232g</a> | similar to splP36110 Saccharomyces cerevisiae YKR013w PRY2 similar to the plant PR-1 class of pathogen response proteins, start by similarity |
| <a href="#">CAGL0F03003g</a> | some similarities with splP32334 Saccharomyces cerevisiae YGR014w MSB2 or splP41809 Saccharomyces cerevisiae YDR420w HKR1, hypothetical start |
| <a href="#">CAGL0H06413g</a> | similar to splO13547 Saccharomyces cerevisiae YLR390wa CW14, start similarity                                                                 |
| <a href="#">KLLA0C12177g</a> | some similarities with splQ1221 Saccharomyces cerevisiae YOL101w WSC3 cell wall integrity and stress response component 3, hypothetical start |

|                              |                                                                                                                                                                                                        |
|------------------------------|--------------------------------------------------------------------------------------------------------------------------------------------------------------------------------------------------------|
| <a href="#">DEHA0A05302g</a> | similar to CA5213 CaSSR1 Cand albicans CaSSR1 Secretory Stress Response protein 1, start by similarity                                                                                                 |
| <a href="#">CAGL0H09614g</a> | highly similar to splP10863 Saccharomyces cerevisiae YER01 TIR1 or splP33890 Saccharomyces cerevisiae YOR010c TIR2, start by similarity                                                                |
| <a href="#">KLLA0E00704g</a> | gil5531272 emblCAB50897.1 Kluyveromyces lactis WSC4 homolog, start by similarity                                                                                                                       |
| <a href="#">DEHA0G19877g</a> | some similarities with splP5330 Saccharomyces cerevisiae YGR13 CRH1 family of putative glycosidases, might exert a common role in cell organization, hypothetical start                                |
| <a href="#">YALI0E33539g</a> | similar to splP53616 Saccharomyces cerevisiae YNL066w SUN4, start by similarity                                                                                                                        |
| <a href="#">DEHA0C11814g</a> | no similarity, hypothetical start                                                                                                                                                                      |
| <a href="#">KLLA0A03179g</a> | some similarities with splP3602 Saccharomyces cerevisiae YLR33 MID2 mating process protein, hypothetical start                                                                                         |
| <a href="#">CAGL0J11176g</a> | some similarities with splP5388 Saccharomyces cerevisiae YNL17, hypothetical start                                                                                                                     |
| <a href="#">YALI0E23969g</a> | no similarity, hypothetical start                                                                                                                                                                      |
| <a href="#">KLLA0E24893g</a> | no similarity, hypothetical start                                                                                                                                                                      |
| <a href="#">YALI0E35090g</a> | weakly similar to splP32323 Saccharomyces cerevisiae YNR04 AGA1 a-agglutinin anchor subunit, singleton, hypothetical start                                                                             |
| <a href="#">DEHA0B05478g</a> | similar to CA0728 IPF7345 Cand albicans IPF7345 unknown function, hypothetical start                                                                                                                   |
| <a href="#">YALI0E33913g</a> | weakly similar to splP08640 Saccharomyces cerevisiae YIR01 STA1 extracellular alpha-1,4-glucosidase P2.341.f2.1, hypothetical start                                                                    |
| <a href="#">KLLA0D08239g</a> | some similarities with splP5388 Saccharomyces cerevisiae YNL17, singleton, hypothetical start                                                                                                          |
| <a href="#">CAGL0J00253g</a> | similar to splP53214 Saccharomyces cerevisiae YGR023w MTL1, hypothetical start                                                                                                                         |
| <a href="#">KLLA0F02497g</a> | weakly similar to splP39732 Saccharomyces cerevisiae YAL03 FUN21 hypothetical protein singleton, hypothetical start                                                                                    |
| <a href="#">YALI0E20757g</a> | some similarities with splO1354 Saccharomyces cerevisiae YLR390 SSR1 Secretory Stress Response protein 1, hypothetical start                                                                           |
| <a href="#">CAGL0G05808g</a> | weakly similar to splP53882 Saccharomyces cerevisiae YNL17, start by similarity                                                                                                                        |
| <a href="#">YALI0F04213g</a> | emblZ69781 Yarrowia lipolytica T gene, thermosensitive suppressor of 7SRNA defect, involved in the signal recognition particle-dependent translocation pathway of secretory proteins, identified start |
| <a href="#">YALI0D13266g</a> | No Similarity, Hypothetical Start                                                                                                                                                                      |
| <a href="#">CAGL0G08668g</a> | similar to splP53616 Saccharomyces cerevisiae YNL066w SUN4 or splP40472 Saccharomyces cerevisiae YIL123w SIM1, hypothetical start                                                                      |
| <a href="#">KLLA0D14377g</a> | weakly similar to splP54867 Saccharomyces cerevisiae YOR0 SLG1 required for cell wall integrity for stress response singleton, start by similarity                                                     |



|                                |                         |                                                                                                             |        |     |     |     |     |     |       |              |                         |                              |                                                                                                                                                                   |
|--------------------------------|-------------------------|-------------------------------------------------------------------------------------------------------------|--------|-----|-----|-----|-----|-----|-------|--------------|-------------------------|------------------------------|-------------------------------------------------------------------------------------------------------------------------------------------------------------------|
|                                |                         |                                                                                                             |        |     |     |     |     |     |       |              |                         | <a href="#">DEHA0B01804g</a> | no similarity, hypothetical start                                                                                                                                 |
|                                |                         |                                                                                                             |        |     |     |     |     |     |       |              |                         | <a href="#">CAGL0C03575g</a> | some similarities with splP4717 Saccharomyces cerevisiae YJR15 hypothetical start                                                                                 |
|                                |                         |                                                                                                             |        |     |     |     |     |     |       |              |                         | <a href="#">YALI0E05819g</a> | weakly similar to splP08640 Saccharomyces cerevisiae YIR01 STA1 extracellular alpha-1, 4-glu glucosidase, hypothetical start                                      |
|                                |                         |                                                                                                             |        |     |     |     |     |     |       |              |                         | <a href="#">CAGL0F01485g</a> | similar to splP10863 Saccharomy cerevisiae YER011w TIR1 or trlQ1 Saccharomyces cerevisiae YOR00 hypothetical start                                                |
|                                |                         |                                                                                                             |        |     |     |     |     |     |       |              |                         | <a href="#">CAGL0M11792g</a> | weakly similar to splP39732 Saccharomyces cerevisiae YAL03 FUN21, hypothetical start                                                                              |
|                                |                         |                                                                                                             |        |     |     |     |     |     |       |              |                         | <a href="#">DEHA0D05423g</a> | similar to Candida albicans CaWS Cell wall integrity                                                                                                              |
|                                |                         |                                                                                                             |        |     |     |     |     |     |       |              |                         | <a href="#">YALI0F05720g</a> | weakly similar to splP53214 Saccharomyces cerevisiae YGR02 MTL1 potential cell wall stress sen                                                                    |
|                                |                         |                                                                                                             |        |     |     |     |     |     |       |              |                         | <a href="#">YALI0D09185g</a> | some similarities with splP3232 Saccharomyces cerevisiae YNR04 AGA1 a-agglutinin anchor subun hypothetical start                                                  |
|                                |                         |                                                                                                             |        |     |     |     |     |     |       |              |                         | <a href="#">YALI0D07854g</a> | no similarity, hypothetical start                                                                                                                                 |
|                                |                         |                                                                                                             |        |     |     |     |     |     |       |              |                         | <a href="#">KLLA0F22671g</a> | some similarities with splP5330 Saccharomyces cerevisiae YGR1 CRH1 family of putative glycosid might exert a common role in cell organization, hypothetical start |
|                                |                         |                                                                                                             |        |     |     |     |     |     |       |              |                         | <a href="#">YALI0F05786g</a> | some similarities with splP1086 Saccharomyces cerevisiae YER01 TIR1 cold-shock, hypothetical st                                                                   |
|                                |                         |                                                                                                             |        |     |     |     |     |     |       |              |                         | <a href="#">DEHA0E21890g</a> | no similarity, hypothetical start                                                                                                                                 |
|                                |                         |                                                                                                             |        |     |     |     |     |     |       |              |                         | <a href="#">YALI0A16214g</a> | weakly similar to splP53832 Saccharomyces cerevisiae Cell w integrity and stress response compo 2 precursor, hypothetical start                                   |
|                                |                         |                                                                                                             |        |     |     |     |     |     |       |              |                         | <a href="#">KLLA0C11583g</a> | weakly similar to splP43633 Saccharomyces cerevisiae YGL02 ALK1 DNA damage-responsive pro start by similarity                                                     |
|                                |                         |                                                                                                             |        |     |     |     |     |     |       |              |                         | <a href="#">DEHA0D10780g</a> | similar to CA2150IPF19940 Can albicans IPF19940 unknown funct start by similarity                                                                                 |
|                                |                         |                                                                                                             |        |     |     |     |     |     |       |              |                         | <a href="#">YALI0C08140g</a> | no similarity, hypothetical start                                                                                                                                 |
|                                |                         |                                                                                                             |        |     |     |     |     |     |       |              |                         | <a href="#">DEHA0F26862g</a> | similar to splP47032 Saccharomy cerevisiae YJL079c PRY1, hypothe start                                                                                            |
|                                |                         |                                                                                                             |        |     |     |     |     |     |       |              |                         | <a href="#">YALI0E24673g</a> | weakly similar to splP53301 Saccharomyces cerevisiae YGR1 CRH1, hypothetical start                                                                                |
| <a href="#">SGA1 (YIL099W)</a> | <a href="#">3.2.1.3</a> | splP08019 Saccharomyces cerevisiae YIL099w SGA1 sporulation specific glucan 1,4-alpha-glucosidase singleton | viable | 0.9 | 0.7 | 0.6 | Non | 0.8 | sckdy | 1 1 1 1<br>1 | <a href="#">GLR.507</a> | <a href="#">YALI0E05203g</a> | some similarities with splP0801 Saccharomyces cerevisiae YIL09 SGA1 sporulation specific glucan alpha-glucosidase, hypothetical st                                |
|                                |                         |                                                                                                             |        |     |     |     |     |     |       |              |                         | <a href="#">DEHA0A12705g</a> | similar to splP08019 Saccharomy cerevisiae YIL099w SGA1 sporula specific glucan 1,4-alpha -glucosid hypothetical start                                            |
|                                |                         |                                                                                                             |        |     |     |     |     |     |       |              |                         | <a href="#">KLLA0F04059g</a> | weakly similar to splP08019 Saccharomyces cerevisiae YIL09 SGA1 sporulation specific glucan alpha-glucosidase singleton, hypoth start                             |
|                                |                         |                                                                                                             |        |     |     |     |     |     |       |              |                         | <a href="#">CAGL0G02717g</a> | similar to splP08019 Saccharomy cerevisiae YIL099w SGA1 sporula specific glucan 1, 4-alpha-glucosid hypothetical start                                            |
|                                |                         |                                                                                                             |        |     |     |     |     |     |       |              |                         | <a href="#">YALI0E33715g</a> | weakly similar to splP08640 Saccharomyces cerevisiae YIR01 STA1 extracellular alpha-1,4-glu glucosidase P2.341.f2.1, hypothet start                               |

|                              |                                                                                                                                                 |
|------------------------------|-------------------------------------------------------------------------------------------------------------------------------------------------|
| <a href="#">DEHA0E13915g</a> | similar to calCA2024IPF9616 Can albicans IPF9616 unknown function start by similarity                                                           |
| <a href="#">KLLA0B14927g</a> | no similarity, hypothetical start                                                                                                               |
| <a href="#">KLLA0E21131g</a> | no similarity, hypothetical start                                                                                                               |
| <a href="#">YALI0B06919g</a> | no similarity, hypothetical start                                                                                                               |
| <a href="#">YALI0B12606g</a> | no similarity, hypothetical start                                                                                                               |
| <a href="#">YALI0B17028g</a> | weakly similar to trlQ8XQP2 Ralstonia solanacearum Putative hemagglutinin/hemolysin-related protein hypothetical start                          |
| <a href="#">YALI0D18436g</a> | no similarity, hypothetical start                                                                                                               |
| <a href="#">KLLA0C11517g</a> | no similarity, hypothetical start                                                                                                               |
| <a href="#">KLLA0A04345g</a> | no similarity, hypothetical start                                                                                                               |
| <a href="#">YALI0E16731g</a> | no similarity, hypothetical start                                                                                                               |
| <a href="#">YALI0C05390g</a> | no similarity, hypothetical start                                                                                                               |
| <a href="#">CAGL0E06600g</a> | some similarities with splP3889 Saccharomyces cerevisiae YHR210C FLO5, hypothetical start                                                       |
| <a href="#">DEHA0G20141g</a> | weakly similar to CA2769IPF15870 Candida albicans IPF15870, hypothetical start                                                                  |
| <a href="#">YALI0C09031g</a> | no similarity, no start                                                                                                                         |
| <a href="#">KLLA0C01276g</a> | no similarity, hypothetical start                                                                                                               |
| <a href="#">YALI0E33737g</a> | weakly similar to CA2714CaIFF2 Candida albicans CaIFF2, hypothetical start                                                                      |
| <a href="#">YALI0E29425g</a> | weakly similar to splP08640 Saccharomyces cerevisiae YIR019c STA1 extracellular alpha-1,4-glucanase glucosidase, hypothetical start             |
| <a href="#">YALI0D02299g</a> | similar to splP08640 Saccharomyces cerevisiae YIR019c STA1 extracellular alpha-1,4-glucanase glucosidase, hypothetical start                    |
| <a href="#">KLLA0A11748g</a> | no similarity, hypothetical start                                                                                                               |
| <a href="#">KLLA0D07942g</a> | no similarity, hypothetical start                                                                                                               |
| <a href="#">YALI0D00627g</a> | weakly similar to splP32334 Saccharomyces cerevisiae YGR019C MSB2 multicopy suppressor of a bud emergence defect, hypothetical start            |
| <a href="#">KLLA0F24486g</a> | no similarity, hypothetical start                                                                                                               |
| <a href="#">YALI0C24211g</a> | no similarity, hypothetical start                                                                                                               |
| <a href="#">DEHA0B02244g</a> |                                                                                                                                                 |
| <a href="#">CAGL0M14069g</a> | some similarities with splP3889 Saccharomyces cerevisiae YHR210C FLO5, hypothetical start                                                       |
| <a href="#">YALI0A01870g</a> | similar to splP29029 Saccharomyces cerevisiae Endochitinase precursor 3.2.1.14 Soluble cell wall protein 2) by similarity                       |
| <a href="#">YALI0E16841g</a> | no similarity, hypothetical start                                                                                                               |
| <a href="#">YALI0C13970g</a> | weakly similar to splP08640 Saccharomyces cerevisiae YIR019c STA1 extracellular alpha-1,4-glucanase glucosidase P2.341.f2.1, hypothetical start |
| <a href="#">YALI0A09559g</a> | no similarity, hypothetical start                                                                                                               |
| <a href="#">YALI0F15653g</a> | some similarities with splP08640 Saccharomyces cerevisiae YIR019c STA1 extracellular alpha-1,4-glucanase glucosidase, hypothetical start        |
| <a href="#">CAGL0M09779g</a> | similar to splP29029 Saccharomyces cerevisiae YLR286c endochitinase hypothetical start                                                          |
| <a href="#">KLLA0C04994g</a> | weakly similar to sgdIS000294 Saccharomyces cerevisiae YDR535C start by similarity                                                              |
| <a href="#">YALI0D13530g</a> | no similarity, hypothetical start                                                                                                               |
|                              | some similarities with splP2084                                                                                                                 |

|                                |                                                                                                                                     |                                                                                                           |        |    |    |    |    |    |    |       |                |                        |                              |                                                                                                                                      |
|--------------------------------|-------------------------------------------------------------------------------------------------------------------------------------|-----------------------------------------------------------------------------------------------------------|--------|----|----|----|----|----|----|-------|----------------|------------------------|------------------------------|--------------------------------------------------------------------------------------------------------------------------------------|
| <a href="#">MUC1 (YIRO19C)</a> | <a href="#">3.2.1.3</a>                                                                                                             | splP08640<br>Saccharomyces cerevisiae YIRO19c STA1 extracellular alpha-1,4-glucan glucosidase P2.341.f2.1 | viable | NA | NA | NA | NA | NA | NA | sckdy | 7 4 12<br>8 43 | <a href="#">GLC.11</a> | <a href="#">KLLA0E09658g</a> | Saccharomyces cerevisiae YJRO0 SAG1 alpha-agglutinin singletor hypothetical start                                                    |
|                                |                                                                                                                                     |                                                                                                           |        |    |    |    |    |    |    |       |                |                        | <a href="#">YALI0D22396g</a> | weakly similar to splP29029 Saccharomyces cerevisiae YLR28 CTS1endochitinase singletor, hypothetical start                           |
|                                |                                                                                                                                     |                                                                                                           |        |    |    |    |    |    |    |       |                |                        | <a href="#">YALI0F10802g</a> | weakly similar to splP08640 Saccharomyces cerevisiae YIRO1 STA1 extracellular alpha-1, 4-glu glucosidase, no start                   |
|                                |                                                                                                                                     |                                                                                                           |        |    |    |    |    |    |    |       |                |                        | <a href="#">YALI0D13992g</a> | no similarity, hypothetical start                                                                                                    |
|                                |                                                                                                                                     |                                                                                                           |        |    |    |    |    |    |    |       |                |                        | <a href="#">YALI0E22572g</a> | weakly similar to splP08640 Saccharomyces cerevisiae YIRO1 STA1 extracellular alpha-1, 4-glu glucosidase                             |
|                                |                                                                                                                                     |                                                                                                           |        |    |    |    |    |    |    |       |                |                        | <a href="#">YALI0C16247g</a> | no similarity, hypothetical start                                                                                                    |
|                                |                                                                                                                                     |                                                                                                           |        |    |    |    |    |    |    |       |                |                        | <a href="#">YALI0C08476g</a> | weakly similar to splP08640 Saccharomyces cerevisiae YIRO1 STA1 extracellular alpha-1, 4-glu glucosidase, hypothetical start         |
|                                |                                                                                                                                     |                                                                                                           |        |    |    |    |    |    |    |       |                |                        | <a href="#">DEHA0A14784g</a> | similar to CA1678IPF5185 Cand albicans IPF5185 putative cell w protein (by homology), start by simi                                  |
|                                |                                                                                                                                     |                                                                                                           |        |    |    |    |    |    |    |       |                |                        | <a href="#">YALI0C03916g</a> | weakly similar to KLLA-IPF618 Kluveromyces lactis IPF 6186. hypothetical start                                                       |
|                                |                                                                                                                                     |                                                                                                           |        |    |    |    |    |    |    |       |                |                        | <a href="#">KLLA0E10945g</a> |                                                                                                                                      |
|                                |                                                                                                                                     |                                                                                                           |        |    |    |    |    |    |    |       |                |                        | <a href="#">DEHA0G19096g</a> | some similarities with CA1898IPF1 Candida albicans IPF11998, hypoth start                                                            |
|                                |                                                                                                                                     |                                                                                                           |        |    |    |    |    |    |    |       |                |                        | <a href="#">YALI0E32395g</a> | weakly similar to splP08640 Saccharomyces cerevisiae YIRO1 STA1 extracellular alpha-1, 4-glu glucosidase P2.341.f2.1, hypothet start |
|                                |                                                                                                                                     |                                                                                                           |        |    |    |    |    |    |    |       |                |                        | <a href="#">YALI0E14993g</a> | no similarity, hypothetical start                                                                                                    |
|                                |                                                                                                                                     |                                                                                                           |        |    |    |    |    |    |    |       |                |                        | <a href="#">YALI0D18249g</a> | some similarities with trlQ8WZ Neurospora crassa Dynactin (150 dynein-associated polypeptide) re hypothetical start                  |
|                                |                                                                                                                                     |                                                                                                           |        |    |    |    |    |    |    |       |                |                        | <a href="#">YALI0E31273g</a> | weakly similar to trlQ8SY55 Dros melanogaster GH09355p, hypothet start                                                               |
|                                |                                                                                                                                     |                                                                                                           |        |    |    |    |    |    |    |       |                |                        | <a href="#">YALI0E02442g</a> | no similarity, hypothetical start                                                                                                    |
|                                |                                                                                                                                     |                                                                                                           |        |    |    |    |    |    |    |       |                |                        | <a href="#">YALI0A15796g</a> | no similarity, hypothetical start                                                                                                    |
|                                |                                                                                                                                     |                                                                                                           |        |    |    |    |    |    |    |       |                |                        | <a href="#">YALI0B15422g</a> | no similarity, hypothetical start                                                                                                    |
|                                |                                                                                                                                     |                                                                                                           |        |    |    |    |    |    |    |       |                |                        | <a href="#">YALI0C03894g</a> | weakly similar to DEHA-IPF878 Debaryomyces hansenii IPF 8785 hypothetical start                                                      |
|                                |                                                                                                                                     |                                                                                                           |        |    |    |    |    |    |    |       |                |                        | <a href="#">YALI0A13079g</a> | no similarity, hypothetical start                                                                                                    |
|                                |                                                                                                                                     |                                                                                                           |        |    |    |    |    |    |    |       |                |                        | <a href="#">KLLA0A01826g</a> | some similarities with splP4180 Saccharomyces cerevisiae YDR42 HKR1 Hansenula MrakII k9 killer t resistance protein, hypothetical st |
|                                |                                                                                                                                     |                                                                                                           |        |    |    |    |    |    |    |       |                |                        | <a href="#">DEHA0G01573g</a> | weakly similar to splP08640 Saccharomyces cerevisiae YIRO1 STA1 extracellular alpha-1, 4-glu glucosidase, start by similarity        |
|                                |                                                                                                                                     |                                                                                                           |        |    |    |    |    |    |    |       |                |                        | <a href="#">YALI0D22825g</a> | no similarity, hypothetical start                                                                                                    |
| <a href="#">YALI0F07216g</a>   | similar to splP08640 Saccharomy cerevisiae YIRO19c STA1 extracel alpha-1, 4-glucan glucosidase, hypothetical start, start by simila |                                                                                                           |        |    |    |    |    |    |    |       |                |                        |                              |                                                                                                                                      |
| <a href="#">YALI0D25014g</a>   | weakly similar to trlQ97P71 Streptococcus pneumoniae Cell w surface anchor family protein, hypothetical start                       |                                                                                                           |        |    |    |    |    |    |    |       |                |                        |                              |                                                                                                                                      |
| <a href="#">YALI0C18293g</a>   | weakly similar to trlQ9N4S7 Caenorhabditis elegans Y51B11A protein, hypothetical start                                              |                                                                                                           |        |    |    |    |    |    |    |       |                |                        |                              |                                                                                                                                      |
|                                | weakly similar to splP32334 Saccharomyces cerevisiae YGP01                                                                          |                                                                                                           |        |    |    |    |    |    |    |       |                |                        |                              |                                                                                                                                      |

|                                |                          |                                                                                                 |        |     |     |     |     |     |       |       |                          |                              |                                                                                                                                       |
|--------------------------------|--------------------------|-------------------------------------------------------------------------------------------------|--------|-----|-----|-----|-----|-----|-------|-------|--------------------------|------------------------------|---------------------------------------------------------------------------------------------------------------------------------------|
|                                |                          |                                                                                                 |        |     |     |     |     |     |       |       |                          | <a href="#">CAGL0F08833g</a> | Saccharomyces cerevisiae YRO1 MSB2 multicopy suppressor of a C bud emergence defect, hypothetical start                               |
|                                |                          |                                                                                                 |        |     |     |     |     |     |       |       |                          | <a href="#">YALI0E22550g</a> | weakly similar to splP08640 Saccharomyces cerevisiae YRO1 STA1 extracellular alpha-1,4-glucosidase, hypothetical start                |
|                                |                          |                                                                                                 |        |     |     |     |     |     |       |       |                          | <a href="#">YALI0D02915g</a> | no similarity, hypothetical start                                                                                                     |
|                                |                          |                                                                                                 |        |     |     |     |     |     |       |       |                          | <a href="#">DEHA0G06655g</a> | similar to splP29029 Saccharomyces cerevisiae Endochitinase precursor (3.2.1.14) (Soluble cell wall protein), start by similarity     |
|                                |                          |                                                                                                 |        |     |     |     |     |     |       |       |                          | <a href="#">YALI0B16676g</a> | no similarity, hypothetical start                                                                                                     |
|                                |                          |                                                                                                 |        |     |     |     |     |     |       |       |                          | <a href="#">DEHA0G01595g</a> | weakly similar to splP40442 Saccharomyces cerevisiae YIL16 related to glucan 1, 4-alpha-glucosidase, hypothetical start               |
|                                |                          |                                                                                                 |        |     |     |     |     |     |       |       |                          | <a href="#">YALI0E20229g</a> | no similarity, hypothetical start                                                                                                     |
| <a href="#">PGU1 (YJR153W)</a> | <a href="#">3.2.1.15</a> | -                                                                                               | viable | 0.4 | Ess | 0.1 | 0.4 | Ess | s---- | 10000 | none                     | -                            | -                                                                                                                                     |
| <a href="#">GPH1 (YPR160W)</a> | <a href="#">2.4.1.1</a>  | splP06738 Saccharomyces cerevisiae YPR160w GPH1 glycogen phosphorylase singleton                | viable | NA  | NA  | NA  | NA  | NA  | sekdy | 11111 | <a href="#">GLR.500</a>  | <a href="#">KLLA0F10065g</a> | highly similar to splP06738 Saccharomyces cerevisiae YPR160w GPH1 glycogen phosphorylase singleton, start by similarity               |
|                                |                          |                                                                                                 |        |     |     |     |     |     |       |       |                          | <a href="#">CAGL0F04895g</a> | highly similar to splP06738 Saccharomyces cerevisiae YPR160w GPH1 glycogen phosphorylase, start by similarity                         |
|                                |                          |                                                                                                 |        |     |     |     |     |     |       |       |                          | <a href="#">DEHA0F23782g</a> | highly similar to CA5206(CaGPH1) Candida albicans CaGPH1 Glycogen phosphorylase (by homology), hypothetical start                     |
|                                |                          |                                                                                                 |        |     |     |     |     |     |       |       |                          | <a href="#">YALI0F04169g</a> | similar to splP06738 Saccharomyces cerevisiae YPR160w GPH1 glycogen phosphorylase, hypothetical start                                 |
| <a href="#">EXG2 (YDR261C)</a> | <a href="#">3.2.1.58</a> | splP52911 Saccharomyces cerevisiae YDR261c EXG2 exo-beta-1,3-glucanase minor isoform P3.33.f3.1 | viable | NA  | NA  | NA  | NA  | NA  | sekdy | 44252 | <a href="#">GLR.3219</a> | <a href="#">KLLA0F18788g</a> | similar to splP38081 Saccharomyces cerevisiae YBR056w singleton, start by similarity                                                  |
|                                |                          |                                                                                                 |        |     |     |     |     |     |       |       |                          | <a href="#">CAGL0M08756g</a> | similar to splP52911 Saccharomyces cerevisiae YDR261c exo-beta-1,3-glucanase, hypothetical start                                      |
|                                |                          |                                                                                                 |        |     |     |     |     |     |       |       |                          | <a href="#">CAGL0I00484g</a> | similar to splP23776 Saccharomyces cerevisiae YLR300w EXG1, start by similarity                                                       |
|                                |                          |                                                                                                 |        |     |     |     |     |     |       |       |                          | <a href="#">DEHA0D09196g</a> | similar to splP29717 Candida albicans CaEXG1 Glucan 1, 3-beta-glucosidase precursor, hypothetical start                               |
|                                |                          |                                                                                                 |        |     |     |     |     |     |       |       |                          | <a href="#">DEHA0F01485g</a> | similar to CA4180(CaEXG2) Candida albicans CaEXG2, hypothetical start                                                                 |
|                                |                          |                                                                                                 |        |     |     |     |     |     |       |       |                          | <a href="#">KLLA0C05324g</a> | gill150442(emb CAA86949.1) Kluyveromyces lactis exo-1, 3-beta-D-glucanase/1, 3-beta-D-Glucanase glucanohydrolase, start by similarity |
|                                |                          |                                                                                                 |        |     |     |     |     |     |       |       |                          | <a href="#">DEHA0F01716g</a> | similar to trlO93939 Hansenula anomala Exo-1,3-beta-glucanase (EC 3.2.1.58), hypothetical start                                       |
|                                |                          |                                                                                                 |        |     |     |     |     |     |       |       |                          | <a href="#">YALI0F05390g</a> | splQ12725 Yarrowia lipolytica Glucanase 3-beta-glucosidase precursor (EC 3.2.1.58) (Exo-1, 3-beta-glucanase), identified start        |
|                                |                          |                                                                                                 |        |     |     |     |     |     |       |       |                          | <a href="#">CAGL0H10120g</a> | similar to splP38081 Saccharomyces cerevisiae YBR056w, start by similarity                                                            |
|                                |                          |                                                                                                 |        |     |     |     |     |     |       |       |                          | <a href="#">DEHA0G07095g</a> | no similarity, hypothetical start                                                                                                     |
|                                |                          |                                                                                                 |        |     |     |     |     |     |       |       |                          | <a href="#">YALI0E34155g</a> | some similarities with KLLA-IPF6 Kluyveromyces lactis IPF 644.1, hypothetical start                                                   |
|                                |                          |                                                                                                 |        |     |     |     |     |     |       |       |                          | <a href="#">CAGL0G09515g</a> | similar to splP23776 Saccharomyces cerevisiae YLR300w EXG1 exo-beta-1,3-glucanase (I/II), hypothetical start                          |
|                                |                          |                                                                                                 |        |     |     |     |     |     |       |       |                          | <a href="#">DEHA0F26378g</a> | similar to calCA5339(IPF885) Candida albicans IPF885 glucan 1,3-beta-glucosidase (by homology), hypothetical start                    |

|                                |                                                                                                                   |                                                                                                               |        |     |     |     |     |     |     |       |              |                          |                              |                                                                                                                                           |
|--------------------------------|-------------------------------------------------------------------------------------------------------------------|---------------------------------------------------------------------------------------------------------------|--------|-----|-----|-----|-----|-----|-----|-------|--------------|--------------------------|------------------------------|-------------------------------------------------------------------------------------------------------------------------------------------|
| <a href="#">BGL2 (YGR282C)</a> | <a href="#">3.2.1.58</a>                                                                                          | splP15703<br>Saccharomyces cerevisiae YGR282c<br>BGL2 endo-beta-1,3-glucanase of the cell wall P4.19.f3.1     | viable | NA  | NA  | NA  | NA  | NA  | NA  | sckdy | 1 1 1 2<br>2 | <a href="#">GLR.3339</a> | <a href="#">YALI0F13299g</a> | weakly similar to trlQ96W35 Ophiostoma novo-ulmi Glucan 1, 3-glucosidase-like protein (Fragmented hypothetical start)                     |
|                                |                                                                                                                   |                                                                                                               |        |     |     |     |     |     |     |       |              |                          | <a href="#">YALI0B03564g</a> | similar to splP43070 Candida albicans Glucan 1,3-beta -glucosidase precursor (EC 3.2.1.58) (Exo-1, 3-beta-glucanase), start by similarity |
|                                |                                                                                                                   |                                                                                                               |        |     |     |     |     |     |     |       |              |                          | <a href="#">DEHA0G19943g</a> | similar to splP15703 Saccharomyces cerevisiae YGR282c BGL2 endo-beta-1,3-glucanase of the cell wall, hypothetical start                   |
|                                |                                                                                                                   |                                                                                                               |        |     |     |     |     |     |     |       |              |                          | <a href="#">CAGL0G00220g</a> | highly similar to splP15703 Saccharomyces cerevisiae YGR282c BGL2, start by similarity                                                    |
|                                |                                                                                                                   |                                                                                                               |        |     |     |     |     |     |     |       |              |                          | <a href="#">KLLA0F03036g</a> | highly similar to splP15703 Saccharomyces cerevisiae YGR282c BGL2 endo-beta-1, 3-glucanase of the cell wall, start by similarity          |
|                                |                                                                                                                   |                                                                                                               |        |     |     |     |     |     |     |       |              |                          | <a href="#">DEHA0E22715g</a> | some similarities with CA2245IIPF Candida albicans IPF7409 unknown function, hypothetical start                                           |
| <a href="#">EXG1 (YLR300W)</a> | <a href="#">3.2.1.58</a>                                                                                          | splP23776<br>Saccharomyces cerevisiae YLR300w<br>EXG1 exo-beta-1,3-glucanase (I/II), major isoform P3.33.f3.1 | viable | 0.8 | Non | Non | Non | Non | Non | sckdy | 4 4 2 5<br>2 | <a href="#">GLR.3219</a> | <a href="#">KLLA0F18788g</a> | similar to splP38081 Saccharomyces cerevisiae YBR056w singleton, start by similarity                                                      |
|                                |                                                                                                                   |                                                                                                               |        |     |     |     |     |     |     |       |              |                          | <a href="#">CAGL0M08756g</a> | similar to splP52911 Saccharomyces cerevisiae YDR261c exo-beta-1,3-glucanase, hypothetical start                                          |
|                                |                                                                                                                   |                                                                                                               |        |     |     |     |     |     |     |       |              |                          | <a href="#">CAGL0I00484g</a> | similar to splP23776 Saccharomyces cerevisiae YLR300w EXG1, start by similarity                                                           |
|                                |                                                                                                                   |                                                                                                               |        |     |     |     |     |     |     |       |              |                          | <a href="#">DEHA0D09196g</a> | similar to splP29717 Candida albicans CaEXG1 Glucan 1, 3-beta-glucosidase precursor, hypothetical start                                   |
|                                |                                                                                                                   |                                                                                                               |        |     |     |     |     |     |     |       |              |                          | <a href="#">DEHA0F01485g</a> | similar to CA4180I CaEXG2 Candida albicans CaEXG2, hypothetical start                                                                     |
|                                |                                                                                                                   |                                                                                                               |        |     |     |     |     |     |     |       |              |                          | <a href="#">KLLA0C05324g</a> | gi1150442lembI CAA86949.1 Kluyveromyces lactis exo-1, 3-beta-glucanase/1, 3-beta-D-Glucanohydrolase, start by similarity                  |
|                                |                                                                                                                   |                                                                                                               |        |     |     |     |     |     |     |       |              |                          | <a href="#">DEHA0F01716g</a> | similar to trlO93939 Hansenula anomala Exo-1,3-beta-glucanase (EC 3.2.1.58) hypothetical start                                            |
|                                |                                                                                                                   |                                                                                                               |        |     |     |     |     |     |     |       |              |                          | <a href="#">YALI0F05390g</a> | splQ12725 Yarrowia lipolytica Glucan 1,3-beta-glucosidase precursor (EC 3.2.1.58) (Exo-1, 3-beta-glucanase) identified start              |
|                                |                                                                                                                   |                                                                                                               |        |     |     |     |     |     |     |       |              |                          | <a href="#">CAGL0H10120g</a> | similar to splP38081 Saccharomyces cerevisiae YBR056w, start by similarity                                                                |
|                                |                                                                                                                   |                                                                                                               |        |     |     |     |     |     |     |       |              |                          | <a href="#">DEHA0G07095g</a> | no similarity, hypothetical start                                                                                                         |
|                                |                                                                                                                   |                                                                                                               |        |     |     |     |     |     |     |       |              |                          | <a href="#">YALI0E34155g</a> | some similarities with KLLA-IPF6 Kluyveromyces lactis IPF 644.1 hypothetical start                                                        |
|                                |                                                                                                                   |                                                                                                               |        |     |     |     |     |     |     |       |              |                          | <a href="#">CAGL0G09515g</a> | similar to splP23776 Saccharomyces cerevisiae YLR300w EXG1 exo-beta-1,3-glucanase (I/II), hypothetical start                              |
| <a href="#">DEHA0F26378g</a>   | similar to calCA5339IIPF885 Candida albicans IPF885 glucan 1,3-beta-glucosidase (by homology), hypothetical start |                                                                                                               |        |     |     |     |     |     |     |       |              |                          |                              |                                                                                                                                           |
|                                |                                                                                                                   |                                                                                                               |        |     |     |     |     |     |     |       |              |                          | <a href="#">KLLA0F18788g</a> | similar to splP38081 Saccharomyces cerevisiae YBR056w singleton, start by similarity                                                      |
|                                |                                                                                                                   |                                                                                                               |        |     |     |     |     |     |     |       |              |                          | <a href="#">CAGL0M08756g</a> | similar to splP52911 Saccharomyces cerevisiae YDR261c exo-beta-1,3-glucanase, hypothetical start                                          |
|                                |                                                                                                                   |                                                                                                               |        |     |     |     |     |     |     |       |              |                          | <a href="#">CAGL0I00484g</a> | similar to splP23776 Saccharomyces cerevisiae YLR300w EXG1, start by similarity                                                           |
|                                |                                                                                                                   |                                                                                                               |        |     |     |     |     |     |     |       |              |                          | <a href="#">DEHA0D09196g</a> | similar to splP29717 Candida albicans CaEXG1 Glucan 1, 3-beta-glucosidase precursor, hypothetical start                                   |
|                                |                                                                                                                   |                                                                                                               |        |     |     |     |     |     |     |       |              |                          | <a href="#">DEHA0F01485g</a> | similar to CA4180I CaEXG2 Candida albicans CaEXG2, hypothetical start                                                                     |

|                                                   |                          |                                                                                                   |                                                                      |     |     |    |     |     |       |              |                          |                              |                                                                                                                                |
|---------------------------------------------------|--------------------------|---------------------------------------------------------------------------------------------------|----------------------------------------------------------------------|-----|-----|----|-----|-----|-------|--------------|--------------------------|------------------------------|--------------------------------------------------------------------------------------------------------------------------------|
| <a href="#">SPR1</a><br><a href="#">(YOR190W)</a> | <a href="#">3.2.1.58</a> | splP32603<br>Saccharomyces cerevisiae YOR190w<br>SPR1 exo-1,3-beta-glucanase precursor P3.33.f3.1 | viable                                                               | 0.6 | 0.8 | ND | 0.3 | 0.4 | sckdy | 4 4 2 5<br>2 | <a href="#">GLR.3219</a> | <a href="#">KLLA0C05324g</a> | gil1150442lembCAA86949.1 Kluyveromyces lactis exo-1, 3-beta-glucanase/1, 3-beta-D-Glucan glucanohydrolase, start by similar    |
|                                                   |                          |                                                                                                   |                                                                      |     |     |    |     |     |       |              |                          | <a href="#">DEHA0F01716g</a> | similar to trlO93939 Hansenula ano Exo-1,3-beta-glucanase (EC 3.2.1.1) hypothetical start                                      |
|                                                   |                          |                                                                                                   |                                                                      |     |     |    |     |     |       |              |                          | <a href="#">YALI0F05390g</a> | splQ12725 Yarrowia lipolytica Gluc 3-beta-glucosidase precursor (E 3.2.1.58) (Exo-1, 3-beta- glucan identified start           |
|                                                   |                          |                                                                                                   |                                                                      |     |     |    |     |     |       |              |                          | <a href="#">CAGL0H10120g</a> | similar to splP38081 Saccharomy cerevisiae YBR056w, start by simil                                                             |
|                                                   |                          |                                                                                                   |                                                                      |     |     |    |     |     |       |              |                          | <a href="#">DEHA0G07095g</a> | no similarity, hypothetical start                                                                                              |
|                                                   |                          |                                                                                                   |                                                                      |     |     |    |     |     |       |              |                          | <a href="#">YALIE34155g</a>  | some similarities with KLLA-IPF6 Kluyveromyces lactis IPF 644.1 hypothetical start                                             |
|                                                   |                          |                                                                                                   |                                                                      |     |     |    |     |     |       |              |                          | <a href="#">CAGL0G09515g</a> | similar to splP23776 Saccharomy cerevisiae YLR300w EXG1 exo-be 3-glucanase (I/II), hypothetical st                             |
|                                                   |                          |                                                                                                   |                                                                      |     |     |    |     |     |       |              |                          | <a href="#">DEHA0F26378g</a> | similar to calCA5339IPF885 Cand albicans IPF885 glucan 1,3-beta- glucosidase (by homology), hypothe start                      |
| <a href="#">VPS8</a><br><a href="#">(YAL002W)</a> | <a href="#">2.7.1.-</a>  | splP39702<br>Saccharomyces cerevisiae YAL002w<br>VPS8 vacuolar sorting protein, 134 kD singleton  | Exhibits sensitivity at 15 generations when grown in 10 uM nystatin. | NA  | NA  | NA | NA  | NA  | sckd- | 1 1 1 1<br>0 | <a href="#">GLR.1058</a> | <a href="#">DEHA0A09020g</a> | similar to splP39702 Saccharomy cerevisiae YAL002w VPS8 vacu sorting protein, 134 kD, start by similarity                      |
|                                                   |                          |                                                                                                   |                                                                      |     |     |    |     |     |       |              |                          | <a href="#">KLLA0C18491g</a> | weakly similar to splP39702 Saccharomyces cerevisiae YAL002w VPS8 vacuolar sorting protein, 134 singleton, start by similarity |
|                                                   |                          |                                                                                                   |                                                                      |     |     |    |     |     |       |              |                          | <a href="#">CAGL0A00781g</a> | similar to splP39702 Saccharomy cerevisiae YAL002w VPS8, hypothe start                                                         |
|                                                   |                          |                                                                                                   |                                                                      |     |     |    |     |     |       |              |                          | <a href="#">KLLA0F11319g</a> | similar to sgdI50006071 Saccharom cerevisiae YPL150w, start by simil                                                           |
|                                                   |                          |                                                                                                   |                                                                      |     |     |    |     |     |       |              |                          | <a href="#">CAGL0L07810g</a> | similar to splP25333 Saccharomy cerevisiae YCR008w SAT4 serine/threonine-specific protein ki start by similarity               |
|                                                   |                          |                                                                                                   |                                                                      |     |     |    |     |     |       |              |                          | <a href="#">CAGL0K11550g</a> | similar to splP28708 Saccharomy cerevisiae YKL116c, hypothetical                                                               |
|                                                   |                          |                                                                                                   |                                                                      |     |     |    |     |     |       |              |                          | <a href="#">YALI0F11385g</a> | weakly similar to SPIP38691 Saccharomyces cerevisiae YHR082c KSP1 ser/thr protein kinase and DE IPF5974.1, start by similarity |
|                                                   |                          |                                                                                                   |                                                                      |     |     |    |     |     |       |              |                          | <a href="#">KLLA0A09713g</a> | similar to splQ03533 Saccharomy cerevisiae YMR291w, start by simi                                                              |
|                                                   |                          |                                                                                                   |                                                                      |     |     |    |     |     |       |              |                          | <a href="#">KLLA0E17127g</a> | similar to splP38691 Saccharomy cerevisiae YHR082c KSP1 ser/t protein kinase, start by similarit                               |
|                                                   |                          |                                                                                                   |                                                                      |     |     |    |     |     |       |              |                          | <a href="#">YALI0C04158g</a> | similar to splP18961 Saccharomy cerevisiae Serine/threonine-prote kinase YPK2/YKR2, hypothetical                               |
|                                                   |                          |                                                                                                   |                                                                      |     |     |    |     |     |       |              |                          | <a href="#">DEHA0F24676g</a> | similar to splP24719 Saccharomy cerevisiae YOR351c MEK1 ser/t protein kinase                                                   |
|                                                   |                          |                                                                                                   |                                                                      |     |     |    |     |     |       |              |                          | <a href="#">DEHA0G14817g</a> | similar to CA26431CaHSL1 Cand albicans CaHSL1, hypothetical st                                                                 |
|                                                   |                          |                                                                                                   |                                                                      |     |     |    |     |     |       |              |                          | <a href="#">DEHA0C18150g</a> | similar to splP40494 Saccharomy cerevisiae YIL095w PRK1 serine/threonine protein kinase, sta similarity                        |
|                                                   |                          |                                                                                                   |                                                                      |     |     |    |     |     |       |              |                          | <a href="#">CAGL0K10604g</a> | similar to splP27466 Saccharomy cerevisiae YFR014c CMK1 Ca2+/calmodulin-dependent ser/ protein kinase type I, hypothetical     |
|                                                   |                          |                                                                                                   |                                                                      |     |     |    |     |     |       |              |                          | <a href="#">DEHA0C08591g</a> | similar to splP22204 Saccharomy cerevisiae YGR092w DBF2, hypothetical start, sequence gap                                      |
|                                                   |                          |                                                                                                   |                                                                      |     |     |    |     |     |       |              |                          | <a href="#">YALI0E13620g</a> | some similarities with splP2356 Saccharomyces cerevisiae YLR36                                                                 |

|                              |                                                                                                                                                                 |
|------------------------------|-----------------------------------------------------------------------------------------------------------------------------------------------------------------|
| <a href="#">YALI0F13927g</a> | STE11 ser/thr protein kinase of the MEKK family, hypothetical start                                                                                             |
| <a href="#">KLLA0C06138g</a> | similar to splP32562 Saccharomyces cerevisiae YMR001c CDC5 involved in regulation of DNA replication, start by similarity                                       |
| <a href="#">YALI0F16159g</a> | some similarities with wilNCU0099 Neurospora crassa NCU00914. hypothetical protein, hypothetical start                                                          |
| <a href="#">CAGL0K08514g</a> | similar to splP34244 Saccharomyces cerevisiae YKL101w serine/threonine protein kinase, hypothetical start                                                       |
| <a href="#">DEHA0F25278g</a> | similar to calCA1881CaRCK2 Candida albicans CaRCK2 Ca/calmodulin dependent ser/thr protein kinase (by homology), hypothetical start                             |
| <a href="#">KLLA0F26983g</a> | some similarities with splP3280 Saccharomyces cerevisiae YKL040c ELM1 ser/thr-specific protein kinase, hypothetical start                                       |
| <a href="#">DEHA0C11484g</a> | similar to splP22211 Saccharomyces cerevisiae YNL183c NPR1 or trlQ111 Saccharomyces cerevisiae YDL020c, hypothetical start                                      |
| <a href="#">YALI0C00891g</a> | similar to splO14019 Schizosaccharomyces pombe Proboscis serine/threonine-protein kinase C29A4.16 (EC 2.7.1.-), hypothetical start                              |
| <a href="#">KLLA0F23507g</a> | similar to splP24719 Saccharomyces cerevisiae YOR351c MEK1 ser/thr protein kinase, start by similarity                                                          |
| <a href="#">CAGL0F03245g</a> | similar to splP32361 Saccharomyces cerevisiae YHR079c IRE1, hypothetical start                                                                                  |
| <a href="#">CAGL0K11990g</a> | some similarities with splP3808 Saccharomyces cerevisiae YBR030c AKL1 Ark-family Kinase-Like protein, hypothetical start                                        |
| <a href="#">DEHA0G10417g</a> | similar to CA19711CaPKH2 Candida albicans CaPKH2 Ser/Thr protein kinase(by homology), hypothetical start                                                        |
| <a href="#">YALI0B17556g</a> | weakly similar to trlQ9Y898 Emergomyces nidulans Calcium/calmodulin dependent protein kinase C, hypothetical start                                              |
| <a href="#">CAGL0G03047g</a> | highly similar to splP22204 Saccharomyces cerevisiae YGR090c DBF2 ser/thrprotein kinase or splP32204 Saccharomyces cerevisiae YPR110c DBF20, hypothetical start |
| <a href="#">YALI0F27093g</a> | weakly similar to DEHA-IPF372 Debaromyces hansenii, hypothetical start                                                                                          |
| <a href="#">DEHA0C14091g</a> | similar to splP37292 Saccharomyces cerevisiae YBR263w SHM1, hypothetical start                                                                                  |
| <a href="#">DEHA0C18601g</a> | similar to CA44331CaBCK1 Candida albicans, hypothetical start                                                                                                   |
| <a href="#">KLLA0C04213g</a> | similar to splP22209 Saccharomyces cerevisiae YAR018c KIN3 ser/thr protein kinase, hypothetical start                                                           |
| <a href="#">YALI0A04697g</a> | similar to splO42626 Neurospora crassa Serine/threonine-protein kinase nrp1 (Nonrepressible conidiation protein), hypothetical start                            |
| <a href="#">YALI0D26015g</a> | similar to splP32562 Saccharomyces cerevisiae Cell cycle protein kinase CDC5/MSD2 (EC 2.7.1.-), hypothetical start                                              |
| <a href="#">DEHA0G14839g</a> | highly similar to sCA3870CaYPK1 Candida albicans CaYPK1, start by similarity                                                                                    |
| <a href="#">KLLA0C14278g</a> | similar to splP28708 Saccharomyces cerevisiae YKL116c, hypothetical start                                                                                       |
|                              | similar to trlCAD79666 Neurospora                                                                                                                               |

|                              |                                                                                                                                                                                                                        |
|------------------------------|------------------------------------------------------------------------------------------------------------------------------------------------------------------------------------------------------------------------|
| <a href="#">YAL10E13750g</a> | crassa BID14.230 Related to serine/threonine-protein kinase a DEHA-IPF6149.1 Debaryomyces hansenii, no start                                                                                                           |
| <a href="#">CAGL0B04147g</a> | highly similar to splP22204 Saccharomyces cerevisiae YGR09 DBF2 ser/thrprotein kinase related DBF20P or splP32328 Saccharomyces cerevisiae YPR111w DBF20 cell cycle protein kinase related to DBF20 hypothetical start |
| <a href="#">DEHA0E13497g</a> | similar to calCA1299ICaPTK2 Candida albicans CaPTK2 serine /threonine protein kinase involved in polyamine uptake (by homology), hypothetical start                                                                    |
| <a href="#">DEHA0D13684g</a> | similar to CA4865IPF4085 Candida albicans IPF4085, start by similarity                                                                                                                                                 |
| <a href="#">CAGL0L06006g</a> | similar to splP53104 Saccharomyces cerevisiae YGL180w APG1 essential for autophagocytosis, hypothetical start                                                                                                          |
| <a href="#">CAGL0E05720g</a> | similar to splP38991 Saccharomyces cerevisiae YPL209c IPL1 ser/thr protein kinase, start by similarity                                                                                                                 |
| <a href="#">KLLA0E18612g</a> | some similarities with splP3808 Saccharomyces cerevisiae YBR05 AKL1 Ark-family Kinase-Like protein, hypothetical start                                                                                                 |
| <a href="#">YAL10E24563g</a> | similar to trlQ12152 Saccharomyces cerevisiae YPL150w, hypothetical start                                                                                                                                              |
| <a href="#">DEHA0E24013g</a> | similar to calCA5226CaRIM15 Candida albicans CaRIM15 Protein kinase involved in the RIM pathway (by homology), hypothetical start                                                                                      |
| <a href="#">CAGL0I04422g</a> | some similarities with splP2220 Saccharomyces cerevisiae YAR0 KIN3 ser/thr protein kinase, hypothetical start                                                                                                          |
| <a href="#">CAGL0K01661g</a> | some similarities with trlQ1210 Saccharomyces cerevisiae YDL02 hypothetical start                                                                                                                                      |
| <a href="#">DEHA0E15741g</a> | highly similar to CA3361CaSNF1 Candida albicans CaSNF1 serine/threonine protein kinase, hypothetical start                                                                                                             |
| <a href="#">CAGL0M02233g</a> | highly similar to splP22216 Saccharomyces cerevisiae YPL15 SPK1 ser/thr/tyr protein kinase, hypothetical start                                                                                                         |
| <a href="#">CAGL0F04741g</a> | similar to splP22517 Saccharomyces cerevisiae YOL016c CMK2 Ca <sup>2+</sup> /calmodulin-dependent ser/thr protein kinase, type II, hypothetical start                                                                  |
| <a href="#">YAL10E06523g</a> | weakly similar to splP34244 Saccharomyces cerevisiae YKL10 HSL1 ser/thr protein kinase, coupled to septin ring assembly to cell cycle progression, hypothetical start                                                  |
| <a href="#">KLLA0E11979g</a> | some similarities with splP25333 Saccharomyces cerevisiae YCR00 SAT4 serine/threonine-specific protein kinase, hypothetical start                                                                                      |
| <a href="#">CAGL0J11308g</a> | similar to splP22211 Saccharomyces cerevisiae YNL183c NPR1 ser/thr protein kinase, hypothetical start                                                                                                                  |
| <a href="#">DEHA0G11638g</a> | similar to splP25333 Saccharomyces cerevisiae YCR008w SAT4 serine/threonine-specific protein kinase, hypothetical start                                                                                                |
| <a href="#">CAGL0H10208g</a> | similar to splP38080 Saccharomyces cerevisiae YBR059c AKL1 Ark-family Kinase-Like protein, hypothetical start                                                                                                          |
| <a href="#">CAGL0B02739g</a> | similar to splP23561 Saccharomyces cerevisiae YLR362w STE11 ser/thr protein kinase of the MEKK family, hypothetical start                                                                                              |



|                              |                                                                                                                                                                                                 |
|------------------------------|-------------------------------------------------------------------------------------------------------------------------------------------------------------------------------------------------|
| <a href="#">YALI0D07150g</a> | weakly similar to trlQ9C2E8 Neurospora crassa Conserved hypothetical protein, start by similarity                                                                                               |
| <a href="#">DEHA0F10197g</a> | highly similar to calCA2265lCaCMK2 Candida albicans CaCMK2 CaMK2-like /calmodulin-dependent ser/thr protein kinase, type II (by homology), hypothetical start                                   |
| <a href="#">DEHA0B12628g</a> | similar to splP06245 Saccharomyces cerevisiae YPL203w TPK2 cAMP-dependent protein kinase 2, catalytic chain, start by similarity                                                                |
| <a href="#">DEHA0E13574g</a> | similar to CA2193lIPF14273 Candida albicans IPF14273 Probable ser/thr protein kinase                                                                                                            |
| <a href="#">KLLA0D07348g</a> | weakly similar to sgdS000606 Saccharomyces cerevisiae YPL142w, start by similarity                                                                                                              |
| <a href="#">DEHA0B12650g</a> | some similarities with splP3897 Saccharomyces cerevisiae YJL164c HAL5 ser/thr protein kinase, hypothetical start                                                                                |
| <a href="#">DEHA0F04114g</a> | similar to CA0576lCaNPR1 Candida albicans CaNPR1, hypothetical start                                                                                                                            |
| <a href="#">DEHA0C13211g</a> | similar to splP22216 Saccharomyces cerevisiae YPL153c SPK1, hypothetical start                                                                                                                  |
| <a href="#">KLLA0B07205g</a> | some similarities with splP0598 Saccharomyces cerevisiae YKL164c TPK3 cAMP-dependent protein kinase catalytic chain, hypothetical start                                                         |
| <a href="#">CAGL0K06479g</a> | some similarities with trlQ0330 Saccharomyces cerevisiae YDR464c, start by similarity                                                                                                           |
| <a href="#">KLLA0C12485g</a> | weakly similar to splQ12236 Saccharomyces cerevisiae YOL100c PKH2, start by similarity                                                                                                          |
| <a href="#">KLLA0E06413g</a> | gil22858696lgbIAAN05732.1 Kluyveromyces lactis protein kinase, start by similarity                                                                                                              |
| <a href="#">YALI0D26213g</a> | weakly similar to trlQ96WJ8 Blumoglomeris Protein kinase C-like protein, hypothetical start                                                                                                     |
| <a href="#">DEHA0G14707g</a> | similar to CA6135lCaCMK1 Candida albicans CaCMK1, hypothetical start                                                                                                                            |
| <a href="#">DEHA0E16115g</a> | similar to CA5074lIPF3607 Candida albicans IPF3607 putative serine/threonine protein kinase, hypothetical start                                                                                 |
| <a href="#">CAGL0M13167g</a> | similar to splP32801 Saccharomyces cerevisiae YKL048c ELM1 ser/thr specific protein kinase, hypothetical start                                                                                  |
| <a href="#">KLLA0F01408g</a> | weakly similar to sgdS000218 Saccharomyces cerevisiae YDL022c, hypothetical start                                                                                                               |
| <a href="#">DEHA0F25212g</a> | highly similar to trlQ9HEW0 Candida albicans cAMP-dependent protein kinase catalytic subunit, hypothetical start                                                                                |
| <a href="#">CAGL0M08404g</a> | some similarities with splP0598 Saccharomyces cerevisiae YKL164c TPK3 or splP06244 Saccharomyces cerevisiae YJL164c SRA3 or splP06244 Saccharomyces cerevisiae YPL203w TPK2, hypothetical start |
| <a href="#">KLLA0A03806g</a> | gil2181934lemblCAA61235.1 Kluyveromyces lactis putative protein kinase, start by similarity                                                                                                     |
| <a href="#">YALI0D19470g</a> | similar to trlQ871H9 Neurospora crassa B16M17.090 Related to Ste20-like protein kinase Don3, hypothetical start                                                                                 |
| <a href="#">YALI0A10230g</a> | similar to splP22211 Saccharomyces cerevisiae YNL183c NPR1 ser/thr protein kinase, start by similarity                                                                                          |
|                              | some similarities with                                                                                                                                                                          |

|                              |                                                                                                                                                                               |
|------------------------------|-------------------------------------------------------------------------------------------------------------------------------------------------------------------------------|
| <a href="#">DEHA0F10461g</a> | caCA1288 CaKSP1 Candida albicans<br>CaKSP1 SERINE/THREONINE<br>PROTEIN KINASE by homologous<br>hypothetical start                                                             |
| <a href="#">YALI0F01716g</a> | trIQ9P860 Yarrowia lipolytica Wee1<br>protein, mitosis inhibitor protein kinase<br>hypothetical start                                                                         |
| <a href="#">YALI0E27632g</a> | trIO93955 Yarrowia lipolytica SSF1<br>protein, multicopy suppressor of SSB1<br>secretory defects, putative calmodulin<br>dependent ser/thr protein kinase<br>identified start |
| <a href="#">CAGL0I09504g</a> | similar to splP38147 Saccharomyces<br>cerevisiae YBR274w CHK1 regulin<br>inhibitory Cdk phosphorylation of F<br>start by similarity                                           |
| <a href="#">CAGL0F09075g</a> | similar to splP11792 Saccharomyces<br>cerevisiae YHR205w SCH9<br>serine/threonine protein kinase, start<br>similarity                                                         |
| <a href="#">DEHA0C17996g</a> | similar to CA2348 IPF12811 Candida<br>albicans, putative serine/threonine<br>kinase, hypothetical start                                                                       |
| <a href="#">CAGL0H00979g</a> | similar to trIQ12003 Saccharomyces<br>cerevisiae YPL236c, hypothetical start                                                                                                  |
| <a href="#">KLLA0C03828g</a> | similar to splP54199 Saccharomyces<br>cerevisiae YDL028c MPS1<br>serine/threonine/tyrosine protein kinase<br>hypothetical start                                               |
| <a href="#">KLLA0F14190g</a> | gil3021329 emblCAA06336.1<br>Kluyveromyces lactis MAP kinase kinase<br>kinase, start by similarity                                                                            |
| <a href="#">CAGL0M10153g</a> | some similarities with splQ0349<br>Saccharomyces cerevisiae YHL001<br>ser/thr protein kinase of the pheromone<br>pathway, hypothetical start                                  |
| <a href="#">KLLA0F24618g</a> | similar to splP38070 Saccharomyces<br>cerevisiae YBR028c, start by similarity                                                                                                 |
| <a href="#">CAGL0K07458g</a> | similar to splP12688 Saccharomyces<br>cerevisiae YKL126w or splP1890<br>Saccharomyces cerevisiae YMR10<br>ser/thr-specific protein kinases, start<br>similarity               |
| <a href="#">KLLA0D03190g</a> | highly similar to splP06245<br>Saccharomyces cerevisiae YPL201<br>TPK2 cAMP-dependent protein kinase<br>catalytic chain, start by similarity                                  |
| <a href="#">DEHA0D19833g</a> | similar to CA5851 CaKIN2 Candida<br>albicans CaKIN2, hypothetical start                                                                                                       |
| <a href="#">KLLA0D14905g</a> | gil28565036 gb AAO32601.1<br>Kluyveromyces lactis DBF2, start<br>similarity                                                                                                   |
| <a href="#">KLLA0C18568g</a> | gil6967028 emblCAB72435.1<br>Kluyveromyces lactis MUP1 protein<br>hypothetical start                                                                                          |
| <a href="#">CAGL0M13541g</a> | similar to splQ03533 Saccharomyces<br>cerevisiae YMR291w, hypothetical start                                                                                                  |
| <a href="#">KLLA0E03487g</a> | similar to sgdI S0002874 Saccharomyces<br>cerevisiae YDR466w, start by similarity                                                                                             |
| <a href="#">DEHA0C08635g</a> | similar to splP22204 Saccharomyces<br>cerevisiae YGR092w DBF2,<br>hypothetical start, sequence gap                                                                            |
| <a href="#">CAGL0G02607g</a> | similar to splP40494 Saccharomyces<br>cerevisiae YIL095w PRK1, start<br>similarity                                                                                            |
| <a href="#">CAGL0K11275g</a> | similar to trIQ03785 Saccharomyces<br>cerevisiae YDR247w, hypothetical start                                                                                                  |
| <a href="#">DEHA0E05753g</a> | similar to CA0719 IPF9779.5 Candida<br>albicans IPF9779.5 serine/threonine<br>protein kinase 5-prime end, hypothetical<br>start                                               |
| <a href="#">YALI0B05588g</a> | some similarities with splQ1223<br>Saccharomyces cerevisiae YOL101<br>PKH2 related to ser/thr protein kinase                                                                  |

|                                                           |                                                                                                                          |          |     |     |     |     |     |       |                      |                       |                              |                                                                                                                                                                                    |
|-----------------------------------------------------------|--------------------------------------------------------------------------------------------------------------------------|----------|-----|-----|-----|-----|-----|-------|----------------------|-----------------------|------------------------------|------------------------------------------------------------------------------------------------------------------------------------------------------------------------------------|
| <a href="#">CDC15 (YAR019C)</a><br><a href="#">2.7.1-</a> | splP27636<br>Saccharomyces cerevisiae YAR019c<br>CDC15 protein kinase of the MAP kinase kinase kinase family P108.1.f6.1 | inviable | 0.3 | Ess | Ess | 0.8 | Ess | sekdy | 57 58<br>49 54<br>42 | <a href="#">GLC.2</a> | <a href="#">DEHA0A08822g</a> | P108.1.f16.1, hypothetical start similar to CA0577IPF16051 Candida albicans IPF16051 unknown function start by similarity                                                          |
|                                                           |                                                                                                                          |          |     |     |     |     |     |       |                      |                       | <a href="#">KLLA0C17160g</a> | similar to splP53104 Saccharomyces cerevisiae YGL180w APG1 essential autophagocytosis, start by similarity                                                                         |
|                                                           |                                                                                                                          |          |     |     |     |     |     |       |                      |                       | <a href="#">KLLA0A02717g</a> | some similarities with splP5323 Saccharomyces cerevisiae YGR05 hypothetical start                                                                                                  |
|                                                           |                                                                                                                          |          |     |     |     |     |     |       |                      |                       | <a href="#">YALI0C21758g</a> | similar to KLLA-IPF4914. Kluyveromyces lactis IPF 4914. hypothetical start                                                                                                         |
|                                                           |                                                                                                                          |          |     |     |     |     |     |       |                      |                       | <a href="#">CAGL0C03509g</a> | similar to splP53739 Saccharomyces cerevisiae YNR047w or splP253 Saccharomyces cerevisiae YCR05 KIN82, hypothetical start                                                          |
|                                                           |                                                                                                                          |          |     |     |     |     |     |       |                      |                       | <a href="#">KLLA0B03586g</a> | similar to splP11792 Saccharomyces cerevisiae YHR205w SCH9 serine/threonine protein kinase involved in stress response and nutrient-sensing signaling pathway, start by similarity |
|                                                           |                                                                                                                          |          |     |     |     |     |     |       |                      |                       | <a href="#">YALI0C15444g</a> | similar to trIQ12706 Schizosaccharomyces pombe Prob serine/threonine protein kinase PS (EC 2.7.1.-), hypothetical start                                                            |
|                                                           |                                                                                                                          |          |     |     |     |     |     |       |                      |                       | <a href="#">YALI0E34067g</a> | weakly similar to DEHA-IPF394 Debaryomyces hansenii IPF 394 hypothetical start                                                                                                     |
|                                                           |                                                                                                                          |          |     |     |     |     |     |       |                      |                       | <a href="#">CAGL0C05005g</a> | similar to splP27636 Saccharomyces cerevisiae YAR019c CDC15, hypothetical start                                                                                                    |
|                                                           |                                                                                                                          |          |     |     |     |     |     |       |                      |                       | <a href="#">DEHA0B04895g</a> | similar to CA2018CaSTE11 Candida albicans CaSTE11 ser/thr protein kinase of the MEKK family, hypothetical start                                                                    |
|                                                           |                                                                                                                          |          |     |     |     |     |     |       |                      |                       | <a href="#">KLLA0B12716g</a> | similar to splP12688 Saccharomyces cerevisiae YKL126w YPK1 ser/thr specific protein kinase, start by similarity                                                                    |
|                                                           |                                                                                                                          |          |     |     |     |     |     |       |                      |                       | <a href="#">CAGL0F03707g</a> | similar to splQ08732 Saccharomyces cerevisiae YOR267c, start by similarity                                                                                                         |
|                                                           |                                                                                                                          |          |     |     |     |     |     |       |                      |                       | <a href="#">YALI0E22858g</a> | Weakly similar to CAAL-CA55 CaAKL1 serine/threonine protein kinase (by homology), Hypothetical start                                                                               |
|                                                           |                                                                                                                          |          |     |     |     |     |     |       |                      |                       | <a href="#">KLLA0F09031g</a> | similar to splP43565 Saccharomyces cerevisiae YFL033c RIM15 protein kinase involved in expression of meiotic genes, hypothetical start                                             |
|                                                           |                                                                                                                          |          |     |     |     |     |     |       |                      |                       | <a href="#">DEHA0E12782g</a> | similar to splP38070 Saccharomyces cerevisiae YBR028c, putative ribosomal protein kinase                                                                                           |
|                                                           |                                                                                                                          |          |     |     |     |     |     |       |                      |                       | <a href="#">CAGL0B01925g</a> | similar to splP13185 Saccharomyces cerevisiae YDR122w KIN1 or splP1 Saccharomyces cerevisiae YLR09 KIN2, hypothetical start                                                        |
|                                                           |                                                                                                                          |          |     |     |     |     |     |       |                      |                       | <a href="#">KLLA0C07535g</a> | some similarities with sgdS00057 Saccharomyces cerevisiae YOR267c hypothetical start                                                                                               |
|                                                           |                                                                                                                          |          |     |     |     |     |     |       |                      |                       | <a href="#">CAGL0D02244g</a> | similar to splP24719 Saccharomyces cerevisiae YOR351c MEK1 ser/thr protein kinase, hypothetical start                                                                              |
|                                                           |                                                                                                                          |          |     |     |     |     |     |       |                      |                       | <a href="#">DEHA0C13387g</a> | similar to trIQ08732 Saccharomyces cerevisiae YOR267C, hypothetical start                                                                                                          |
|                                                           |                                                                                                                          |          |     |     |     |     |     |       |                      |                       | <a href="#">YALI0E17743g</a> | no similarity, hypothetical start                                                                                                                                                  |
|                                                           |                                                                                                                          |          |     |     |     |     |     |       |                      |                       | <a href="#">CAGL0C02893g</a> | similar to trIQ08732 Saccharomyces cerevisiae YOR267c, hypothetical start                                                                                                          |
|                                                           |                                                                                                                          |          |     |     |     |     |     |       |                      |                       | <a href="#">KLLA0F19536g</a> | similar to splP13186 Saccharomyces cerevisiae YLR096w KIN2 ser/thr protein kinase, start by similarity                                                                             |
|                                                           |                                                                                                                          |          |     |     |     |     |     |       |                      |                       | <a href="#">CAGL0M11396g</a> | similar to splP13186 Saccharomyces cerevisiae YLR096w KIN2 ser/thr protein kinase, hypothetical start                                                                              |
| <a href="#">YALI0B13178g</a>                              | similar to splP32490 Saccharomyces cerevisiae YOR231w MKK1 ser/thr                                                       |          |     |     |     |     |     |       |                      |                       |                              |                                                                                                                                                                                    |

|                              |                                                                                                                                                                                              |
|------------------------------|----------------------------------------------------------------------------------------------------------------------------------------------------------------------------------------------|
|                              | protein kinase, start by similarity                                                                                                                                                          |
| <a href="#">DEHA0F27489g</a> | similar to CA1288 CaKSP1 Candida albicans CaKSP1 serine/threonine protein kinase (by homology), start by similarity                                                                          |
| <a href="#">KLLA0B02332g</a> | similar to splP38991 Saccharomyces cerevisiae YPL209c IPL1 ser/thr protein kinase, start by similarity                                                                                       |
| <a href="#">CAGL0L07326g</a> | similar to splP39009 Saccharomyces cerevisiae YDL101c DUN1 protein kinase, start by similarity                                                                                               |
| <a href="#">KLLA0F11143g</a> | similar to splP22216 Saccharomyces cerevisiae YPL153c SPK1 ser/thr protein kinase, start by similarity                                                                                       |
| <a href="#">DEHA0E14641g</a> | similar to CA4097 CaGIN4 Candida albicans CaGIN4 ser/thr protein kinase (by homology), hypothetical start                                                                                    |
| <a href="#">CAGL0J03872g</a> | similar to splQ01919 Saccharomyces cerevisiae YOR233w KIN4 ser/thr protein kinase or tr Q03002 Saccharomyces cerevisiae YPL14 start by similarity                                            |
| <a href="#">YALI0D14542g</a> | similar to splP11792 Saccharomyces cerevisiae YHR205w SCH9 serine/threonine protein kinase involved in stress response and nutrient-sensing signaling pathway, start by similarity           |
| <a href="#">KLLA0B06501g</a> | some similarities with splP4711 Saccharomyces cerevisiae YJR05 PTK2 involved in polyamine uptake, hypothetical start                                                                         |
| <a href="#">DEHA0C05742g</a> | some similarities with splP4189 Schizosaccharomyces pombe Cdc28 division control protein 7 and CA2669 IPF17494.3eoc Candida albicans and CA2404 CaCDC15 Candida albicans, hypothetical start |
| <a href="#">DEHA0F20878g</a> | similar to CA0044 IPF17347 Candida albicans IPF17347, hypothetical start                                                                                                                     |
| <a href="#">KLLA0E08371g</a> | similar to splP40494 Saccharomyces cerevisiae YIL095w PRK1 serine/threonine protein kinase involved in regulation of actin cytoskeleton organization, start by similarity                    |
| <a href="#">KLLA0F13552g</a> | gil33386566 lemb CAD87727.1 Kluyveromyces lactis protein kinase, start by similarity                                                                                                         |
| <a href="#">CAGL0J11638g</a> | highly similar to splP32562 Saccharomyces cerevisiae YMR0 CDC5 involved in regulation of DNA replication, hypothetical start                                                                 |
| <a href="#">CAGL0K02167g</a> | similar to splP38990 Saccharomyces cerevisiae YER129w Serine/threonine protein kinase, start by similarity                                                                                   |
| <a href="#">DEHA0F09493g</a> | similar to calCA2909 IPF11424 Candida albicans IPF11424 unknown function, hypothetical start                                                                                                 |
| <a href="#">CAGL0G05720g</a> | similar to splP22211 Saccharomyces cerevisiae YNL183c NPR1 ser/thr protein kinase, start by similarity                                                                                       |
| <a href="#">DEHA0C09823g</a> | similar to CA1205 CaSSK2 Candida albicans, hypothetical start                                                                                                                                |
| <a href="#">YALI0D22770g</a> | Similar to CAAL-CA5851 CaKIP1 ser/thr protein kinase (by homology), start                                                                                                                    |
| <a href="#">CAGL0M08910g</a> | highly similar to splQ00372 Saccharomyces cerevisiae YDR47 carbon catabolite derepressing serine/threonine protein kinase, hypothetical start                                                |
| <a href="#">KLLA0C04191g</a> | weakly similar to splP27636 Saccharomyces cerevisiae YAR0 CDC15 protein kinase of the MAP kinase kinase kinase family, hypothetical start                                                    |

|                              |                                                                                                                                                                                                        |
|------------------------------|--------------------------------------------------------------------------------------------------------------------------------------------------------------------------------------------------------|
| <a href="#">DEHA0B16071g</a> | similar to splP22209 Saccharomyces cerevisiae YAR018c KIN3 ser/thr protein kinase, start by similarity                                                                                                 |
| <a href="#">CAGL0K03399g</a> | highly similar to splP12688 Saccharomyces cerevisiae YKL12 Serine/threonine-protein kinase, start by similarity                                                                                        |
| <a href="#">CAGL0J04972g</a> | some similarities with trlQ1210 Saccharomyces cerevisiae YDL02 hypothetical start                                                                                                                      |
| <a href="#">DEHA0F10923g</a> | highly similar to calCA2986(CaCD Candida albicans CaCDC5 Cell-cycle protein kinase (by homology), start by similarity                                                                                  |
| <a href="#">YALI0B04840g</a> | similar to trlQ12003 Saccharomyces cerevisiae YPL236c, start by similarity                                                                                                                             |
| <a href="#">KLLA0C01650g</a> | similar to splQ12263 Saccharomyces cerevisiae YDR507c GIN4 ser/thr protein kinase, start by similarity                                                                                                 |
| <a href="#">YALI0F08165g</a> | some similarities with splP4189 Schizosaccharomyces pombe 7 CL OR SPBC21.06C gene Cell division control protein, start by similarity                                                                   |
| <a href="#">KLLA0E01584g</a> | highly similar to splP39009 Saccharomyces cerevisiae YDL10 DUN1 protein kinase, start by similarity                                                                                                    |
| <a href="#">DEHA0C02882g</a> | similar to CA4039(CaSKS1 Candida albicans, start by similarity                                                                                                                                         |
| <a href="#">KLLA0F01276g</a> | similar to splP38147 Saccharomyces cerevisiae YBR274w CHK1 regulatory inhibitory Cdk phosphorylation of F start by similarity                                                                          |
| <a href="#">CAGL0G09020g</a> | highly similar to splP06245 Saccharomyces cerevisiae YPL20 TPK2 cAMP-dependent protein kinase catalytic chain, hypothetical start                                                                      |
| <a href="#">DEHA0G16302g</a> | similar to trlQ12706 Schizosaccharomyces pombe Probable serine/threonine protein kinase PS start by similarity                                                                                         |
| <a href="#">CAGL0I06248g</a> | similar to splP38970 Saccharomyces cerevisiae YJL165c HAL5 ser/thr protein kinase, start by similarity                                                                                                 |
| <a href="#">YALI0B08558g</a> | weakly similar to trlQ00863 Necthaematococca Ran1-like protein kinase, hypothetical start                                                                                                              |
| <a href="#">DEHA0G05544g</a> | similar to CA1375(IPPF7158 Candida albicans IPPF7158 putative serine/threonine kinase, hypothetical start                                                                                              |
| <a href="#">KLLA0B13607g</a> | weakly similar to splQ03497 Saccharomyces cerevisiae YHL0 STE20 ser/thr protein kinase of the pheromone pathway, hypothetical start                                                                    |
| <a href="#">YALI0F27159g</a> | some similarities with splP4704 Saccharomyces cerevisiae YJL057c probable serine/threonine-protein kinase, hypothetical start                                                                          |
| <a href="#">CAGL0I05390g</a> | similar to splQ12505 Saccharomyces cerevisiae YPL026c SKS1 suppressor kinase of SNF3 or trlQ03785 Saccharomyces cerevisiae YDR24 start by similarity                                                   |
| <a href="#">YALI0E31361g</a> | similar to trlQ9HF33 Arthrobotrydactyloides Calmodulin-binding protein kinase, hypothetical start                                                                                                      |
| <a href="#">YALI0B14201g</a> | similar to splP32328 Saccharomyces cerevisiae YPR111w DBF20 cell cycle protein kinase P108.1.f3.6 or splP2 Saccharomyces cerevisiae YGR09 DBF2 ser/thr protein kinase P108.1.f16.1, hypothetical start |
| <a href="#">DEHA0C16181g</a> | similar to CA1447(CaNRK1 Candida albicans, hypothetical start                                                                                                                                          |
| <a href="#">CAGL0K04301g</a> | similar to splP53233 Saccharomyces                                                                                                                                                                     |

|                              |                                                                                                                                                           |
|------------------------------|-----------------------------------------------------------------------------------------------------------------------------------------------------------|
| <a href="#">CAGL0M07301g</a> | cerevisiae YGR052w, hypothetical                                                                                                                          |
| <a href="#">KLLA0A06820g</a> | some similarities with splP3897<br>Saccharomyces cerevisiae YJL16<br>HAL5 ser/thr protein kinase, hypoth<br>start                                         |
| <a href="#">KLLA0C00979g</a> | similar to splP08458 Saccharomy<br>cerevisiae YDR523c SPS1 ser/thr pr<br>kinase, hypothetical start                                                       |
| <a href="#">YALI0D02101g</a> | similar to splO94168 Candida tropi<br>Carbon catabolite derepressing pro<br>kinase (EC 2.7.1.-), hypothetical s                                           |
| <a href="#">YALI0C08305g</a> | highly similar to splP06245<br>Saccharomyces cerevisiae YPL20<br>TPK2 cAMP-dependent protein kin<br>catalytic chain, hypothetical sta                     |
| <a href="#">KLLA0D12100g</a> | some similarities with sgdS0002<br>Saccharomyces cerevisiae YDR24<br>hypothetical start                                                                   |
| <a href="#">CAGL0M10791g</a> | highly similar to splP53599<br>Saccharomyces cerevisiae YNR0<br>SSK2 MAP kinase, no start, frame                                                          |
| <a href="#">YALI0A05247g</a> | similar to trlQ876Z5 Neurospora cr<br>OS-4 Putative SSK22 like MAPK<br>kinase, hypothetical start                                                         |
| <a href="#">DEHA0F24684g</a> | similar to splP24719 Saccharomy<br>cerevisiae YOR351c MEK1 ser/t<br>protein kinase                                                                        |
| <a href="#">KLLA0B13112g</a> | similar to splP23561 Saccharomy<br>cerevisiae YLR362w STE11 ser/<br>protein kinase of the MEKK family<br>by similarity                                    |
| <a href="#">CAGL0F03311g</a> | similar to splP38691 Saccharomy<br>cerevisiae YHR082c KSP1 ser/t<br>protein kinase, start by similarit                                                    |
| <a href="#">KLLA0C03938g</a> | some similarities with sgdS0002<br>Saccharomyces cerevisiae YDL02<br>hypothetical start                                                                   |
| <a href="#">CAGL0M08360g</a> | some similarities with splP3897<br>Saccharomyces cerevisiae YJL16<br>ser/thr protein kinase, hypothetical                                                 |
| <a href="#">YALI0E34375g</a> | similar to wilNCU00108.1 Neurosp<br>crassa NCU00108.1 hypothetical pr<br>(9322 - 91750), hypothetical sta                                                 |
| <a href="#">KLLA0B07579g</a> | weakly similar to splP32944<br>Saccharomyces cerevisiae YJL18<br>SWE1 ser/tyr dual-specificity prote<br>kinase, start by similarity                       |
| <a href="#">YALI0D25388g</a> | similar to trlQ8TFN2 Pichia angu<br>Serine-threonine kinase Pdd7p<br>hypothetical start                                                                   |
| <a href="#">DEHA0C04840g</a> | some similarities with splP3899<br>Saccharomyces cerevisiae YPL20<br>IPL1 ser/thr protein kinase, hypothe<br>start                                        |
| <a href="#">YALI0B00880g</a> | similar to splP22211 Saccharomy<br>cerevisiae YNL183c NPR1 ser/t<br>protein kinase, hypothetical sta                                                      |
| <a href="#">YALI0D08822g</a> | some similarities with splP3899<br>Saccharomyces cerevisiae YER12<br>PAK1 DNA polymerase alpha<br>suppressing protein kinase, hypothe<br>start            |
| <a href="#">DEHA0G22440g</a> | similar to CA4770 IPF9382.3 Can<br>albicans IPF9382.3, hypothetical s                                                                                     |
| <a href="#">KLLA0C08525g</a> | similar to splP53599 Saccharomy<br>cerevisiae YNR031c SSK2 MAP k<br>kinase kinase of the high osmolar<br>signal transduction pathway, start<br>similarity |
| <a href="#">YALI0F09746g</a> | similar to splP24583 Saccharomy<br>cerevisiae YBL105c PKC1 ser/t<br>protein kinase, start by similarit                                                    |
| <a href="#">DEHA0D07601g</a> | similar to Candida albicans CA42<br>start by similarity                                                                                                   |

|                                 |                         |                                                                                   |        |     |     |     |     |     |       |           |                              |                                                                                                                                           |                                                                                                                        |
|---------------------------------|-------------------------|-----------------------------------------------------------------------------------|--------|-----|-----|-----|-----|-----|-------|-----------|------------------------------|-------------------------------------------------------------------------------------------------------------------------------------------|------------------------------------------------------------------------------------------------------------------------|
|                                 |                         |                                                                                   |        |     |     |     |     |     |       |           | <a href="#">CAGL0I07513g</a> | similar to splQ12236 Saccharomyces cerevisiae YOL100w PKH2, start similarity                                                              |                                                                                                                        |
|                                 |                         |                                                                                   |        |     |     |     |     |     |       |           | <a href="#">DEHA0D11242g</a> | highly similar to CA5299IPF215 Candida albicans IPF2190, start similarity                                                                 |                                                                                                                        |
|                                 |                         |                                                                                   |        |     |     |     |     |     |       |           | <a href="#">DEHA0F26994g</a> | similar to CA0206IPF14089 Candida albicans IPF14089 putative serine/threonine protein kinase hypothetical start                           |                                                                                                                        |
|                                 |                         |                                                                                   |        |     |     |     |     |     |       |           | <a href="#">CAGL0M09361g</a> | highly similar to splP24583 Saccharomyces cerevisiae YBL10 PKC1 ser/thr protein kinase, start similarity                                  |                                                                                                                        |
|                                 |                         |                                                                                   |        |     |     |     |     |     |       |           | <a href="#">YALI0E06501g</a> | similar to splP12688 Saccharomyces cerevisiae YKL126w YPK1 ser/thr specific protein kinase, hypothetical start                            |                                                                                                                        |
|                                 |                         |                                                                                   |        |     |     |     |     |     |       |           | <a href="#">CAGL0K05709g</a> | similar to splQ12263 Saccharomyces cerevisiae YDR507c GIN4, start similarity                                                              |                                                                                                                        |
|                                 |                         |                                                                                   |        |     |     |     |     |     |       |           | <a href="#">DEHA0C09130g</a> | similar to splP38147 Saccharomyces cerevisiae YBR274w CHK1, hypothetical start                                                            |                                                                                                                        |
|                                 |                         |                                                                                   |        |     |     |     |     |     |       |           | <a href="#">CAGL0M02299g</a> | similar to trlQ12152 Saccharomyces cerevisiae YPL150w, start by similarity                                                                |                                                                                                                        |
|                                 |                         |                                                                                   |        |     |     |     |     |     |       |           | <a href="#">CAGL0B04301g</a> | similar to splP38070 Saccharomyces cerevisiae YBR028c, start by similarity                                                                |                                                                                                                        |
|                                 |                         |                                                                                   |        |     |     |     |     |     |       |           | <a href="#">CAGL0I03432g</a> | similar to splP53974 Saccharomyces cerevisiae YNL020c ARK1 or splP4 Saccharomyces cerevisiae YIL09 PRK1, start by similarity              |                                                                                                                        |
|                                 |                         |                                                                                   |        |     |     |     |     |     |       |           | <a href="#">DEHA0D13706g</a> | similar to CA4864IPF4087 Candida albicans IPF4087, hypothetical start                                                                     |                                                                                                                        |
|                                 |                         |                                                                                   |        |     |     |     |     |     |       |           | <a href="#">KLLA0D09328g</a> | some similarities with splP3899 Saccharomyces cerevisiae YER12 PAK1 DNA polymerase alpha suppressing protein kinase, hypothetical start   |                                                                                                                        |
|                                 |                         |                                                                                   |        |     |     |     |     |     |       |           | <a href="#">DEHA0B13519g</a> | some similarities with splP5373 Saccharomyces cerevisiae YNR04 related to ser/thr protein kinases hypothetical start                      |                                                                                                                        |
|                                 |                         |                                                                                   |        |     |     |     |     |     |       |           | <a href="#">CAGL0M02519g</a> | highly similar to trlQ03002 Saccharomyces cerevisiae YPL141 splQ01919 Saccharomyces cerevisiae YOR233w KIN4, hypothetical start           |                                                                                                                        |
|                                 |                         |                                                                                   |        |     |     |     |     |     |       |           | <a href="#">CAGL0G04609g</a> | similar to splQ12236 Saccharomyces cerevisiae YOL100w PKH2, hypothetical start                                                            |                                                                                                                        |
|                                 |                         |                                                                                   |        |     |     |     |     |     |       |           | <a href="#">KLLA0F23155g</a> | similar to splP22517 Saccharomyces cerevisiae YOL016c CMK2 Ca2+/calmodulin-dependent ser/thr protein kinase, type II, start by similarity |                                                                                                                        |
| <a href="#">VPS15 (YBR097W)</a> | <a href="#">2.7.1.-</a> | splP22219 Saccharomyces cerevisiae YBR097w VPS15 ser/thr protein kinase singleton | viable | 0.7 | Ess | Ess | 0.3 | 0.1 | sckdy | 1 1 1 1 1 | <a href="#">GLR.2300</a>     | <a href="#">DEHA0F16742g</a>                                                                                                              | weakly similar to splP22219 Saccharomyces cerevisiae YBR097w VPS15 ser/thr protein kinase singleton hypothetical start |
|                                 |                         |                                                                                   |        |     |     |     |     |     |       |           |                              | <a href="#">CAGL0H08437g</a>                                                                                                              | similar to splP22219 Saccharomyces cerevisiae YBR097w VPS15, start similarity                                          |
|                                 |                         |                                                                                   |        |     |     |     |     |     |       |           |                              | <a href="#">YALI0E33781g</a>                                                                                                              | similar to trlQ9UVG6 Pichia pastoris VPS15 protein, hypothetical start                                                 |
|                                 |                         |                                                                                   |        |     |     |     |     |     |       |           |                              | <a href="#">KLLA0B11924g</a>                                                                                                              | similar to splP22219 Saccharomyces cerevisiae YBR097w VPS15 ser/thr protein kinase singleton, start by similarity      |
|                                 |                         |                                                                                   |        |     |     |     |     |     |       |           | <a href="#">KLLA0F11319g</a> | similar to sgdIS0006071 Saccharomyces cerevisiae YPL150w, start by similarity                                                             |                                                                                                                        |
|                                 |                         |                                                                                   |        |     |     |     |     |     |       |           | <a href="#">CAGL0L07810g</a> | similar to splP25333 Saccharomyces cerevisiae YCR008w SAT4 serine/threonine-specific protein kinase start by similarity                   |                                                                                                                        |
|                                 |                         |                                                                                   |        |     |     |     |     |     |       |           | <a href="#">CAGL0K11550g</a> | similar to splP28708 Saccharomyces cerevisiae YKL116c, hypothetical start                                                                 |                                                                                                                        |

|                              |                                                                                                                                                     |
|------------------------------|-----------------------------------------------------------------------------------------------------------------------------------------------------|
| <a href="#">YALI0E11385g</a> | weakly similar to SPIP38691 Saccharomyces cerevisiae YHR082c KSP1 ser/thr protein kinase and DEHA0F24676g IPF5974.1, start by similarity            |
| <a href="#">KLLA0A09713g</a> | similar to splQ03533 Saccharomyces cerevisiae YMR291w, start by similarity                                                                          |
| <a href="#">KLLA0E17127g</a> | similar to splP38691 Saccharomyces cerevisiae YHR082c KSP1 ser/thr protein kinase, start by similarity                                              |
| <a href="#">YALI0C04158g</a> | similar to splP18961 Saccharomyces cerevisiae Serine/threonine-protein kinase YPK2/YKR2, hypothetical start                                         |
| <a href="#">DEHA0F24676g</a> | similar to splP24719 Saccharomyces cerevisiae YOR351c MEK1 ser/thr protein kinase                                                                   |
| <a href="#">DEHA0G14817g</a> | similar to CA2643CaHSL1 Candida albicans CaHSL1, hypothetical start                                                                                 |
| <a href="#">DEHA0C18150g</a> | similar to splP40494 Saccharomyces cerevisiae YIL095w PRK1 serine/threonine protein kinase, start by similarity                                     |
| <a href="#">CAGL0K10604g</a> | similar to splP27466 Saccharomyces cerevisiae YFR014c CMK1 Ca <sup>2+</sup> /calmodulin-dependent ser/thr protein kinase type I, hypothetical start |
| <a href="#">DEHA0C08591g</a> | similar to splP22204 Saccharomyces cerevisiae YGR092w DBF2, hypothetical start, sequence gap                                                        |
| <a href="#">YALI0F13629g</a> | some similarities with splP23566 Saccharomyces cerevisiae YLR366c STE11 ser/thr protein kinase of the MEKK family, hypothetical start               |
| <a href="#">KLLA0C06138g</a> | similar to splP32562 Saccharomyces cerevisiae YMR001c CDC5 involved in regulation of DNA replication, start by similarity                           |
| <a href="#">YALI0F16159g</a> | some similarities with wilNCU0099 Neurospora crassa NCU00914, hypothetical protein, hypothetical start                                              |
| <a href="#">CAGL0K08514g</a> | similar to splP34244 Saccharomyces cerevisiae YKL101w serine/threonine protein kinase, hypothetical start                                           |
| <a href="#">DEHA0F25278g</a> | similar to calCA1881CaRCK2 Candida albicans CaRCK2 Ca/calmodulin-dependent ser/thr protein kinase (by homology), hypothetical start                 |
| <a href="#">KLLA0F26983g</a> | some similarities with splP32804 Saccharomyces cerevisiae YKL040c ELM1 ser/thr-specific protein kinase, hypothetical start                          |
| <a href="#">DEHA0C11484g</a> | similar to splP22211 Saccharomyces cerevisiae YNL183c NPR1 or trIQ101 Saccharomyces cerevisiae YDL022c, hypothetical start                          |
| <a href="#">YALI0C00891g</a> | similar to splO14019 Schizosaccharomyces pombe Proboscis serine/threonine-protein kinase C29A4.16 (EC 2.7.1.-), hypothetical start                  |
| <a href="#">KLLA0F23507g</a> | similar to splP24719 Saccharomyces cerevisiae YOR351c MEK1 ser/thr protein kinase, start by similarity                                              |
| <a href="#">CAGL0F03245g</a> | similar to splP32361 Saccharomyces cerevisiae YHR079c IRE1, hypothetical start                                                                      |
| <a href="#">CAGL0K11990g</a> | some similarities with splP38084 Saccharomyces cerevisiae YBR050c AKL1 Ark-family Kinase-Like protein, hypothetical start                           |
| <a href="#">DEHA0G10417g</a> | similar to CA19711CaPKH2 Candida albicans CaPKH2 Ser/Thr protein kinase (by homology), hypothetical start                                           |
| <a href="#">YALI0B17556g</a> | weakly similar to trIQ9Y898 Emergomyces nidulans Calcium/calmodulin dependent protein kinase C, hypothetical start                                  |



|                              |                                                                                                                                                                                                                            |
|------------------------------|----------------------------------------------------------------------------------------------------------------------------------------------------------------------------------------------------------------------------|
| <a href="#">CAGL0G03047g</a> | highly similar to splP22204 Saccharomyces cerevisiae YGR09 DBF2 ser/thrprotein kinase or splP3 Saccharomyces cerevisiae YPR11 DBF20, hypothetical start                                                                    |
| <a href="#">YALI0E27093g</a> | weakly similar to DEHA-IPF372 Debaryomyces hansenii, hypothetical start                                                                                                                                                    |
| <a href="#">DEHA0C14091g</a> | similar to splP37292 Saccharomyces cerevisiae YBR263w SHM1, hypothetical start                                                                                                                                             |
| <a href="#">DEHA0C18601g</a> | similar to CA4433CaBCK1 Candida albicans, hypothetical start                                                                                                                                                               |
| <a href="#">KLLA0C04213g</a> | similar to splP22209 Saccharomyces cerevisiae YAR018c KIN3 ser/thr protein kinase, hypothetical start                                                                                                                      |
| <a href="#">YALI0A04697g</a> | similar to splO42626 Neurospora crassa Serine/threonine-protein kinase non-repressible (Nonrepressible conidiation protein), hypothetical start                                                                            |
| <a href="#">YALI0D26015g</a> | similar to splP32562 Saccharomyces cerevisiae Cell cycle protein kinase CDC5/MSD2 (EC 2.7.1.-), hypothetical start                                                                                                         |
| <a href="#">DEHA0G14839g</a> | highly similar to sCA3870CaYPK1 Candida albicans CaYPK1, start by similarity                                                                                                                                               |
| <a href="#">KLLA0C14278g</a> | similar to splP28708 Saccharomyces cerevisiae YKL116c, hypothetical start                                                                                                                                                  |
| <a href="#">YALI0E13750g</a> | similar to trlCAD79666 Neurospora crassa B1D14.230 Related to serine/threonine-protein kinase a DEHA-IPF6149.1 Debaryomyces hansenii, no start                                                                             |
| <a href="#">CAGL0B04147g</a> | highly similar to splP22204 Saccharomyces cerevisiae YGR09 DBF2 ser/thrprotein kinase related to DBF20P or splP32328 Saccharomyces cerevisiae YPR111w DBF20 cell cycle protein kinase related to DBF20, hypothetical start |
| <a href="#">DEHA0F13497g</a> | similar to calCA1299CaPTK2 Candida albicans CaPTK2 serine/threonine protein kinase involved in polyamine uptake (by homology), hypothetical start                                                                          |
| <a href="#">DEHA0D13684g</a> | similar to CA4865IPF4085 Candida albicans IPF4085, start by similarity                                                                                                                                                     |
| <a href="#">CAGL0L06006g</a> | similar to splP53104 Saccharomyces cerevisiae YGL180w APG1 essential for autophagocytosis, hypothetical start                                                                                                              |
| <a href="#">CAGL0E05720g</a> | similar to splP38991 Saccharomyces cerevisiae YPL209c IPL1 ser/thr protein kinase, start by similarity                                                                                                                     |
| <a href="#">KLLA0F18612g</a> | some similarities with splP3808 Saccharomyces cerevisiae YBR03 AKL1 Ark-family Kinase-Like protein, hypothetical start                                                                                                     |
| <a href="#">YALI0E24563g</a> | similar to trlQ12152 Saccharomyces cerevisiae YPL150w, hypothetical start                                                                                                                                                  |
| <a href="#">DEHA0F24013g</a> | similar to calCA5226CaRIM15 Candida albicans CaRIM15 Protein kinase involved in the RIM pathway (by homology), hypothetical start                                                                                          |
| <a href="#">CAGL0I04422g</a> | some similarities with splP22209 Saccharomyces cerevisiae YAR018c KIN3 ser/thr protein kinase, hypothetical start                                                                                                          |
| <a href="#">CAGL0K01661g</a> | some similarities with trlQ1210 Saccharomyces cerevisiae YDL02, hypothetical start                                                                                                                                         |
| <a href="#">DEHA0E15741g</a> | highly similar to CA3361CaSNF1 Candida albicans CaSNF1 serine/threonine protein kinase, hypothetical start                                                                                                                 |

|                              |                                                                                                                                                                     |
|------------------------------|---------------------------------------------------------------------------------------------------------------------------------------------------------------------|
| <a href="#">CAGL0M02233g</a> | highly similar to splP22216 Saccharomyces cerevisiae YPL15 SPK1 ser/thr/tyr protein kinase hypothetical start                                                       |
| <a href="#">CAGL0F04741g</a> | similar to splP22517 Saccharomyces cerevisiae YOL016c CMK2 Ca <sup>2+</sup> /calmodulin-dependent ser/ protein kinase, type II, hypothetical                        |
| <a href="#">YAL10E06523g</a> | weakly similar to splP34244 Saccharomyces cerevisiae YKL10 HSL1 ser/thr protein kinase, coupling septin ring assembly to cell cycle progression, hypothetical start |
| <a href="#">KLLA0E11979g</a> | some similarities with splP25333 Saccharomyces cerevisiae YCR00 SAT4 serine/threonine-specific protein kinase, hypothetical start                                   |
| <a href="#">CAGL0J11308g</a> | similar to splP22211 Saccharomyces cerevisiae YNL183c NPR1 ser/thr protein kinase, hypothetical start                                                               |
| <a href="#">DEHA0G11638g</a> | similar to splP25333 Saccharomyces cerevisiae YCR008w SAT4 serine/threonine-specific protein kinase, hypothetical start                                             |
| <a href="#">CAGL0H10208g</a> | similar to splP38080 Saccharomyces cerevisiae YBR059c AKL1 Ark-fam Kinase-Like protein, hypothetical                                                                |
| <a href="#">CAGL0B02739g</a> | similar to splP23561 Saccharomyces cerevisiae YLR362w STE11 ser/thr protein kinase of the MEKK family, hypothetical start                                           |
| <a href="#">YAL10D07150g</a> | weakly similar to trlQ9C2E8 Neurospora crassa Conserved hypothetical protein, start by similarity                                                                   |
| <a href="#">DEHA0F10197g</a> | highly similar to calCA2265iCaCM2 Candida albicans CaCMK2 Ca <sup>2+</sup> /calmodulin-dependent ser/thr protein kinase, type II (by homology), hypothetical start  |
| <a href="#">DEHA0B12628g</a> | similar to splP06245 Saccharomyces cerevisiae YPL203w TPK2 cAMP-dependent protein kinase 2, catalytic chain, start by similarity                                    |
| <a href="#">DEHA0E13574g</a> | similar to CA2193iIPF14273 Candida albicans IPF14273 Probable ser/thr protein kinase                                                                                |
| <a href="#">KLLA0D07348g</a> | weakly similar to sgdS000606i Saccharomyces cerevisiae YPL14 start by similarity                                                                                    |
| <a href="#">DEHA0B12650g</a> | some similarities with splP3897 Saccharomyces cerevisiae YJL16 HAL5 ser/thr protein kinase, hypothetical start                                                      |
| <a href="#">DEHA0F04114g</a> | similar to CA0576iCaNPR1 Candida albicans CaNPR1, hypothetical start                                                                                                |
| <a href="#">DEHA0C13211g</a> | similar to splP22216 Saccharomyces cerevisiae YPL153c SPK1, hypothetical start                                                                                      |
| <a href="#">KLLA0B07205g</a> | some similarities with splP0598 Saccharomyces cerevisiae YKL10 TPK3 cAMP-dependent protein kinase catalytic chain, hypothetical start                               |
| <a href="#">CAGL0K06479g</a> | some similarities with trlQ0330 Saccharomyces cerevisiae YDR46 start by similarity                                                                                  |
| <a href="#">KLLA0C12485g</a> | weakly similar to splQ12236 Saccharomyces cerevisiae YOL10 PKH2, start by similarity                                                                                |
| <a href="#">KLLA0E06413g</a> | gil22858696lgb AAN05732.1 Kluyveromyces lactis protein kinase, start by similarity                                                                                  |
| <a href="#">YAL10D26213g</a> | weakly similar to trlQ96WJ8 Blumbeia graminis Protein kinase C-like protein, hypothetical start                                                                     |

|                              |                                                                                                                                                                                                                      |
|------------------------------|----------------------------------------------------------------------------------------------------------------------------------------------------------------------------------------------------------------------|
| <a href="#">DEHA0G14707g</a> | similar to CA61351CaCMK1 <i>Candida albicans</i> CaCMK1, hypothetical start                                                                                                                                          |
| <a href="#">DEHA0E16115g</a> | similar to CA5074IIPF3607 <i>Candida albicans</i> IPF3607 putative serine/threonine protein kinase, hypothetical start                                                                                               |
| <a href="#">CAGL0M13167g</a> | similar to splP32801 <i>Saccharomyces cerevisiae</i> YKL048c ELM1 ser/thr-specific protein kinase, hypothetical start                                                                                                |
| <a href="#">KLLA0F01408g</a> | weakly similar to sgdIS000218 <i>Saccharomyces cerevisiae</i> YDL028c, hypothetical start                                                                                                                            |
| <a href="#">DEHA0F25212g</a> | highly similar to trQ9HEW0 <i>Candida albicans</i> cAMP-dependent protein kinase catalytic subunit, hypothetical start                                                                                               |
| <a href="#">CAGL0M08404g</a> | some similarities with splP0598 <i>Saccharomyces cerevisiae</i> YKL164c TPK3 or splP06244 <i>Saccharomyces cerevisiae</i> YJL164c SRA3 or splP06244 <i>Saccharomyces cerevisiae</i> YPL208c TPK2, hypothetical start |
| <a href="#">KLLA0A03806g</a> | gil2181934lembCAA61235.1 <i>Kluyveromyces lactis</i> putative kinase, start by similarity                                                                                                                            |
| <a href="#">YALI0D19470g</a> | similar to trIQ871H9 <i>Neurospora crassa</i> B16M17.090 Related to Ste20-like protein kinase Don3, hypothetical start                                                                                               |
| <a href="#">YALI0A10230g</a> | similar to splP22211 <i>Saccharomyces cerevisiae</i> YNL183c NPR1 ser/thr protein kinase, start by similarity                                                                                                        |
| <a href="#">DEHA0F10461g</a> | some similarities with calCA1288CaKSP1 <i>Candida albicans</i> CaKSP1 SERINE/THREONINE PROTEIN KINASE by homology, hypothetical start                                                                                |
| <a href="#">YALI0F01716g</a> | trIQ9P860 <i>Yarrowia lipolytica</i> Wee1 protein, mitosis inhibitor protein kinase, hypothetical start                                                                                                              |
| <a href="#">YALI0E27632g</a> | trIO93955 <i>Yarrowia lipolytica</i> SSF1 protein, multicopy suppressor of SSB1 secretory defects, putative calmodulin-dependent ser/thr protein kinase, identified start                                            |
| <a href="#">CAGL0I09504g</a> | similar to splP38147 <i>Saccharomyces cerevisiae</i> YBR274w CHK1 regulatory inhibitory Cdk phosphorylation of F-actin, start by similarity                                                                          |
| <a href="#">CAGL0F09075g</a> | similar to splP11792 <i>Saccharomyces cerevisiae</i> YHR205w SCH9 serine/threonine protein kinase, start by similarity                                                                                               |
| <a href="#">DEHA0C17996g</a> | similar to CA2348IIPF12811 <i>Candida albicans</i> , putative serine/threonine kinase, hypothetical start                                                                                                            |
| <a href="#">CAGL0H00979g</a> | similar to trIQ12003 <i>Saccharomyces cerevisiae</i> YPL236c, hypothetical start                                                                                                                                     |
| <a href="#">KLLA0C03828g</a> | similar to splP54199 <i>Saccharomyces cerevisiae</i> YDL028c MPS1 serine/threonine/tyrosine protein kinase, hypothetical start                                                                                       |
| <a href="#">KLLA0F14190g</a> | gil3021329lembCAA06336.1 <i>Kluyveromyces lactis</i> MAP kinase kinase, start by similarity                                                                                                                          |
| <a href="#">CAGL0M10153g</a> | some similarities with splQ0349 <i>Saccharomyces cerevisiae</i> YHL008c ser/thr protein kinase of the pheromone pathway, hypothetical start                                                                          |
| <a href="#">KLLA0F24618g</a> | similar to splP38070 <i>Saccharomyces cerevisiae</i> YBR028c, start by similarity                                                                                                                                    |
| <a href="#">CAGL0K07458g</a> | similar to splP12688 <i>Saccharomyces cerevisiae</i> YKL126w or splP1890 <i>Saccharomyces cerevisiae</i> YMR164c ser/thr-specific protein kinases, start by similarity                                               |

|                                |                                                                                                                  |                                                                                  |                                                                     |    |    |    |    |    |       |                      |                       |                              |                                                                                                                                                                                    |
|--------------------------------|------------------------------------------------------------------------------------------------------------------|----------------------------------------------------------------------------------|---------------------------------------------------------------------|----|----|----|----|----|-------|----------------------|-----------------------|------------------------------|------------------------------------------------------------------------------------------------------------------------------------------------------------------------------------|
| <a href="#">DUN1 (YDL101C)</a> | <a href="#">2.7.1.-</a>                                                                                          | splP39009<br>Saccharomyces cerevisiae YDL101c<br>DUN1 protein kinase P108.1.f5.1 | Exhibits sensitivity at 5 generations when grown in 10 uM nystatin. | NA | NA | NA | NA | NA | sckdy | 57 58<br>49 54<br>42 | <a href="#">GLC.2</a> | <a href="#">KLLA0D03190g</a> | highly similar to splP06245 Saccharomyces cerevisiae YPL20 TPK2 cAMP-dependent protein kinase catalytic chain, start by similarity                                                 |
|                                |                                                                                                                  |                                                                                  |                                                                     |    |    |    |    |    |       |                      |                       | <a href="#">DEHA0D19833g</a> | similar to CA58511CaKIN2 Candida albicans CaKIN2, hypothetical start                                                                                                               |
|                                |                                                                                                                  |                                                                                  |                                                                     |    |    |    |    |    |       |                      |                       | <a href="#">KLLA0D14905g</a> | gil28565036 gblAAO32601.1 Kluyveromyces lactis DBF2, start by similarity                                                                                                           |
|                                |                                                                                                                  |                                                                                  |                                                                     |    |    |    |    |    |       |                      |                       | <a href="#">KLLA0C18568g</a> | gil6967028 emblCAB72435.1 Kluyveromyces lactis MUP1 protein, hypothetical start                                                                                                    |
|                                |                                                                                                                  |                                                                                  |                                                                     |    |    |    |    |    |       |                      |                       | <a href="#">CAGL0M13541g</a> | similar to splQ03533 Saccharomyces cerevisiae YMR291w, hypothetical start                                                                                                          |
|                                |                                                                                                                  |                                                                                  |                                                                     |    |    |    |    |    |       |                      |                       | <a href="#">KLLA0E03487g</a> | similar to sgdlS0002874 Saccharomyces cerevisiae YDR466w, start by similarity                                                                                                      |
|                                |                                                                                                                  |                                                                                  |                                                                     |    |    |    |    |    |       |                      |                       | <a href="#">DEHA0C08635g</a> | similar to splP22204 Saccharomyces cerevisiae YGR092w DBF2, hypothetical start, sequence gap                                                                                       |
|                                |                                                                                                                  |                                                                                  |                                                                     |    |    |    |    |    |       |                      |                       | <a href="#">CAGL0G02607g</a> | similar to splP40494 Saccharomyces cerevisiae YIL095w PRK1, start by similarity                                                                                                    |
|                                |                                                                                                                  |                                                                                  |                                                                     |    |    |    |    |    |       |                      |                       | <a href="#">CAGL0K11275g</a> | similar to trlQ03785 Saccharomyces cerevisiae YDR247w, hypothetical start                                                                                                          |
|                                |                                                                                                                  |                                                                                  |                                                                     |    |    |    |    |    |       |                      |                       | <a href="#">DEHA0E05753g</a> | similar to CA0719 IPF9779.5 Candida albicans IPF9779.5 serine/threonine protein kinase 5-prime end, hypothetical start                                                             |
|                                |                                                                                                                  |                                                                                  |                                                                     |    |    |    |    |    |       |                      |                       | <a href="#">YALI0B05588g</a> | some similarities with splQ1223 Saccharomyces cerevisiae YOL10 PKH2 related to ser/thr protein kinase P108.1.f16.1, hypothetical start                                             |
|                                |                                                                                                                  |                                                                                  |                                                                     |    |    |    |    |    |       |                      |                       | <a href="#">DEHA0A08822g</a> | similar to CA0577 IPF16051 Candida albicans IPF16051 unknown function, start by similarity                                                                                         |
|                                |                                                                                                                  |                                                                                  |                                                                     |    |    |    |    |    |       |                      |                       | <a href="#">KLLA0C17160g</a> | similar to splP53104 Saccharomyces cerevisiae YGL180w APG1 essential for autophagocytosis, start by similarity                                                                     |
|                                |                                                                                                                  |                                                                                  |                                                                     |    |    |    |    |    |       |                      |                       | <a href="#">KLLA0A02717g</a> | some similarities with splP5323 Saccharomyces cerevisiae YGR05 hypothetical start                                                                                                  |
|                                |                                                                                                                  |                                                                                  |                                                                     |    |    |    |    |    |       |                      |                       | <a href="#">YALI0C21758g</a> | similar to KLLA-IPF4914.1 Kluyveromyces lactis IPF 4914, hypothetical start                                                                                                        |
|                                |                                                                                                                  |                                                                                  |                                                                     |    |    |    |    |    |       |                      |                       | <a href="#">CAGL0C03509g</a> | similar to splP53739 Saccharomyces cerevisiae YNR047w or splP2533 Saccharomyces cerevisiae YCR09 KIN82, hypothetical start                                                         |
|                                |                                                                                                                  |                                                                                  |                                                                     |    |    |    |    |    |       |                      |                       | <a href="#">KLLA0B03586g</a> | similar to splP11792 Saccharomyces cerevisiae YHR205w SCH9 serine/threonine protein kinase involved in stress response and nutrient-sensing signaling pathway, start by similarity |
|                                |                                                                                                                  |                                                                                  |                                                                     |    |    |    |    |    |       |                      |                       | <a href="#">YALI0C15444g</a> | similar to trlQ12706 Schizosaccharomyces pombe Prob serine/threonine protein kinase PS (EC 2.7.1.-), hypothetical start                                                            |
|                                |                                                                                                                  |                                                                                  |                                                                     |    |    |    |    |    |       |                      |                       | <a href="#">YALI0E34067g</a> | weakly similar to DEHA-IPF394 Debaryomyces hansenii IPF 394, hypothetical start                                                                                                    |
|                                |                                                                                                                  |                                                                                  |                                                                     |    |    |    |    |    |       |                      |                       | <a href="#">CAGL0C05005g</a> | similar to splP27636 Saccharomyces cerevisiae YAR019c CDC15, hypothetical start                                                                                                    |
| <a href="#">DEHA0B04895g</a>   | similar to CA2018 CaSTE11 Candida albicans CaSTE11 ser/thr protein kinase of the MEKK family, hypothetical start |                                                                                  |                                                                     |    |    |    |    |    |       |                      |                       |                              |                                                                                                                                                                                    |
| <a href="#">KLLA0B12716g</a>   | similar to splP12688 Saccharomyces cerevisiae YKL126w YPK1 ser/thr specific protein kinase, start by similarity  |                                                                                  |                                                                     |    |    |    |    |    |       |                      |                       |                              |                                                                                                                                                                                    |
| <a href="#">CAGL0F03707g</a>   | similar to splQ08732 Saccharomyces cerevisiae YOR267c, start by similarity                                       |                                                                                  |                                                                     |    |    |    |    |    |       |                      |                       |                              |                                                                                                                                                                                    |
| <a href="#">YALI0E22858g</a>   | Weakly similar to CAAL-CA55 CaAKL1 serine/threonine protein kinase (by homology), Hypothetical start             |                                                                                  |                                                                     |    |    |    |    |    |       |                      |                       |                              |                                                                                                                                                                                    |

|                              |                                                                                                                                                                                              |
|------------------------------|----------------------------------------------------------------------------------------------------------------------------------------------------------------------------------------------|
| <a href="#">KLLA0F09031g</a> | similar to splP43565 Saccharomyces cerevisiae YFL033c RIM15 protein kinase involved in expression of me genes, hypothetical start                                                            |
| <a href="#">DEHA0E12782g</a> | similar to splP38070 Saccharomyces cerevisiae YBR028c, putative ribosome protein kinase                                                                                                      |
| <a href="#">CAGL0B01925g</a> | similar to splP13185 Saccharomyces cerevisiae YDR122w KIN1 or splP13186 Saccharomyces cerevisiae YLR096w KIN2, hypothetical start                                                            |
| <a href="#">KLLA0C07535g</a> | some similarities with sgdS00057 Saccharomyces cerevisiae YOR267c, hypothetical start                                                                                                        |
| <a href="#">CAGL0D02244g</a> | similar to splP24719 Saccharomyces cerevisiae YOR351c MEK1 serine/threonine protein kinase, hypothetical start                                                                               |
| <a href="#">DEHA0C13387g</a> | similar to trlQ08732 Saccharomyces cerevisiae YOR267C, hypothetical start                                                                                                                    |
| <a href="#">YAL10E17743g</a> | no similarity, hypothetical start                                                                                                                                                            |
| <a href="#">CAGL0C02893g</a> | similar to trlQ08732 Saccharomyces cerevisiae YOR267c, hypothetical start                                                                                                                    |
| <a href="#">KLLA0F19536g</a> | similar to splP13186 Saccharomyces cerevisiae YLR096w KIN2 serine/threonine protein kinase, start by similarity                                                                              |
| <a href="#">CAGL0M11396g</a> | similar to splP13186 Saccharomyces cerevisiae YLR096w KIN2 serine/threonine protein kinase, hypothetical start                                                                               |
| <a href="#">YAL10B13178g</a> | similar to splP32490 Saccharomyces cerevisiae YOR231w MKK1 serine/threonine protein kinase, start by similarity                                                                              |
| <a href="#">DEHA0F27489g</a> | similar to CA1288 CaKSP1 Candida albicans CaKSP1 serine/threonine protein kinase (by homology), start by similarity                                                                          |
| <a href="#">KLLA0B02332g</a> | similar to splP38991 Saccharomyces cerevisiae YPL209c IPL1 serine/threonine protein kinase, start by similarity                                                                              |
| <a href="#">CAGL0L07326g</a> | similar to splP39009 Saccharomyces cerevisiae YDL101c DUN1 protein kinase, start by similarity                                                                                               |
| <a href="#">KLLA0F11143g</a> | similar to splP22216 Saccharomyces cerevisiae YPL153c SPK1 serine/threonine protein kinase, start by similarity                                                                              |
| <a href="#">DEHA0E14641g</a> | similar to CA4097 CaGIN4 Candida albicans CaGIN4 serine/threonine protein kinase (by homology), hypothetical start                                                                           |
| <a href="#">CAGL0J03872g</a> | similar to splQ01919 Saccharomyces cerevisiae YOR233w KIN4 serine/threonine protein kinase or trlQ03002 Saccharomyces cerevisiae YPL147w protein kinase, start by similarity                 |
| <a href="#">YAL10D14542g</a> | similar to splP11792 Saccharomyces cerevisiae YHR205w SCH9 serine/threonine protein kinase involved in stress response and nutrient-sensing signaling pathway, start by similarity           |
| <a href="#">KLLA0B06501g</a> | some similarities with splP4711 Saccharomyces cerevisiae YJR055w PTK2 involved in polyamine uptake, hypothetical start                                                                       |
| <a href="#">DEHA0C05742g</a> | some similarities with splP4189 Schizosaccharomyces pombe Cdc25 division control protein 7 and CA2669 IPF17494.3eoc Candida albicans and CA2404 CaCDC15 Candida albicans, hypothetical start |
| <a href="#">DEHA0F20878g</a> | similar to CA0044 IPF17347 Candida albicans IPF17347, hypothetical start                                                                                                                     |
| <a href="#">KLLA0E08371g</a> | similar to splP40494 Saccharomyces cerevisiae YIL095w PRK1 serine/threonine protein kinase involved in regulation of actin cytoskeleton organization, start by similarity                    |

|                              |                                                                                                                                                 |
|------------------------------|-------------------------------------------------------------------------------------------------------------------------------------------------|
| <a href="#">KLLA0F13552g</a> | gil33386566lembCAD87727.1<br>Kluyveromyces lactis protein kinase<br>start by similarity                                                         |
| <a href="#">CAGL0I11638g</a> | highly similar to splP32562<br>Saccharomyces cerevisiae YMR0<br>CDC5 involved in regulation of DNA<br>replication, hypothetical start           |
| <a href="#">CAGL0K02167g</a> | similar to splP38990 Saccharomyces<br>cerevisiae YER129w Serine/threonine<br>protein kinase, start by similarity                                |
| <a href="#">DEHA0F09493g</a> | similar to calCA2909IPF11424 Candida<br>albicans IPF11424 unknown function<br>hypothetical start                                                |
| <a href="#">CAGL0G05720g</a> | similar to splP22211 Saccharomyces<br>cerevisiae YNL183c NPR1 serine/threonine<br>protein kinase, start by similarity                           |
| <a href="#">DEHA0C09823g</a> | similar to CA1205CaSSK2 Candida<br>albicans, hypothetical start                                                                                 |
| <a href="#">YALI0D22770g</a> | Similar to CAAL-CA5851 CaK1<br>ser/thr protein kinase (by homology)<br>start                                                                    |
| <a href="#">CAGL0M08910g</a> | highly similar to splQ00372<br>Saccharomyces cerevisiae YDR47<br>carbon catabolite derepressing serine<br>protein kinase, hypothetical start    |
| <a href="#">KLLA0C04191g</a> | weakly similar to splP27636<br>Saccharomyces cerevisiae YAR0<br>CDC15 protein kinase of the MAPK<br>kinase kinase family, hypothetical<br>start |
| <a href="#">DEHA0B16071g</a> | similar to splP22209 Saccharomyces<br>cerevisiae YAR018c KIN3 ser/thr protein<br>kinase, start by similarity                                    |
| <a href="#">CAGL0K03399g</a> | highly similar to splP12688<br>Saccharomyces cerevisiae YKL12<br>Serine/threonine-protein kinase, start<br>by similarity                        |
| <a href="#">CAGL0J04972g</a> | some similarities with trlQ1210<br>Saccharomyces cerevisiae YDL02<br>hypothetical start                                                         |
| <a href="#">DEHA0F10923g</a> | highly similar to calCA2986CaCD<br>Candida albicans CaCDC5 Cell cycle<br>protein kinase (by homology), start<br>by similarity                   |
| <a href="#">YALI0B04840g</a> | similar to trlQ12003 Saccharomyces<br>cerevisiae YPL236c, start by similarity                                                                   |
| <a href="#">KLLA0C01650g</a> | similar to splQ12263 Saccharomyces<br>cerevisiae YDR507c GIN4 ser/thr protein<br>kinase, start by similarity                                    |
| <a href="#">YALI0F08165g</a> | some similarities with splP4189<br>Schizosaccharomyces pombe 7 CL<br>OR SPBC21.06C gene Cell division<br>control protein, start by similarity   |
| <a href="#">KLLA0E01584g</a> | highly similar to splP39009<br>Saccharomyces cerevisiae YDL10<br>DUN1 protein kinase, start by similarity                                       |
| <a href="#">DEHA0C02882g</a> | similar to CA4039CaSKS1 Candida<br>albicans, start by similarity                                                                                |
| <a href="#">KLLA0F01276g</a> | similar to splP38147 Saccharomyces<br>cerevisiae YBR274w CHK1 regulative<br>inhibitory Cdk phosphorylation of P<br>start by similarity          |
| <a href="#">CAGL0G09020g</a> | highly similar to splP06245<br>Saccharomyces cerevisiae YPL20<br>TPK2 cAMP-dependent protein kinase<br>catalytic chain, hypothetical start      |
| <a href="#">DEHA0G16302g</a> | similar to trlQ12706<br>Schizosaccharomyces pombe Prob<br>serine/threonine protein kinase PS<br>start by similarity                             |
| <a href="#">CAGL0I06248g</a> | similar to splP38970 Saccharomyces<br>cerevisiae YJL165c HAL5 ser/thr protein<br>kinase, start by similarity                                    |
|                              | weakly similar to trlQ00863 Nect                                                                                                                |

|                              |                                                                                                                                                                                                                          |
|------------------------------|--------------------------------------------------------------------------------------------------------------------------------------------------------------------------------------------------------------------------|
| <a href="#">YALI0B08558g</a> | haematococca Ran1-like protein kinase<br>hypothetical start                                                                                                                                                              |
| <a href="#">DEHA0G05544g</a> | similar to CA1375IIPF7158 <i>Candida albicans</i> IPF7158 putative serine/threonine kinase, hypothetical start                                                                                                           |
| <a href="#">KLLA0B13607g</a> | weakly similar to splQ03497 <i>Saccharomyces cerevisiae</i> YHL001 STE20 ser/thr protein kinase of the pheromone pathway, hypothetical start                                                                             |
| <a href="#">YALI0F27159g</a> | some similarities with splP4704 <i>Saccharomyces cerevisiae</i> YJL057c probable serine/threonine-protein kinase, hypothetical start                                                                                     |
| <a href="#">CAGL0I05390g</a> | similar to splQ12505 <i>Saccharomyces cerevisiae</i> YPL026c SKS1 suppressor kinase of SNF3 or trlQ03785 <i>Saccharomyces cerevisiae</i> YDR241c start by similarity                                                     |
| <a href="#">YALI0E31361g</a> | similar to trlQ9HF33 <i>Arthrobotryopsis dactyloides</i> Calmodulin-binding protein kinase, hypothetical start                                                                                                           |
| <a href="#">YALI0B14201g</a> | similar to splP32328 <i>Saccharomyces cerevisiae</i> YPR111w DBF20 cell cycle protein kinase P108.1.f3.6 or splP228 <i>Saccharomyces cerevisiae</i> YGR095w DBF2 ser/thr protein kinase P108.1.f16.1, hypothetical start |
| <a href="#">DEHA0C16181g</a> | similar to CA1447ICaNRK1 <i>Candida albicans</i> , hypothetical start                                                                                                                                                    |
| <a href="#">CAGL0K04301g</a> | similar to splP53233 <i>Saccharomyces cerevisiae</i> YGR052w, hypothetical start                                                                                                                                         |
| <a href="#">KLLA0A06820g</a> | some similarities with splP3897 <i>Saccharomyces cerevisiae</i> YJL161c HAL5 ser/thr protein kinase, hypothetical start                                                                                                  |
| <a href="#">KLLA0C00979g</a> | similar to splP08458 <i>Saccharomyces cerevisiae</i> YDR523c SPS1 ser/thr protein kinase, hypothetical start                                                                                                             |
| <a href="#">YALI0D02101g</a> | similar to splO94168 <i>Candida tropicalis</i> Carbon catabolite derepressing protein kinase (EC 2.7.1.-), hypothetical start                                                                                            |
| <a href="#">YALI0C08305g</a> | highly similar to splP06245 <i>Saccharomyces cerevisiae</i> YPL201c TPK2 cAMP-dependent protein kinase catalytic chain, hypothetical start                                                                               |
| <a href="#">KLLA0D12100g</a> | some similarities with sgdI50002 <i>Saccharomyces cerevisiae</i> YDR241c hypothetical start                                                                                                                              |
| <a href="#">CAGL0M10791g</a> | highly similar to splP53599 <i>Saccharomyces cerevisiae</i> YNR015c SSK2 MAP kinase, no start, frame shift                                                                                                               |
| <a href="#">YALI0A05247g</a> | similar to trlQ876Z5 <i>Neurospora crassa</i> OS-4 Putative SSK22 like MAPK kinase, hypothetical start                                                                                                                   |
| <a href="#">DEHA0F24684g</a> | similar to splP24719 <i>Saccharomyces cerevisiae</i> YOR351c MEK1 ser/thr protein kinase                                                                                                                                 |
| <a href="#">KLLA0B13112g</a> | similar to splP23561 <i>Saccharomyces cerevisiae</i> YLR362w STE11 ser/thr protein kinase of the MEKK family, start by similarity                                                                                        |
| <a href="#">CAGL0F03311g</a> | similar to splP38691 <i>Saccharomyces cerevisiae</i> YHR082c KSP1 ser/thr protein kinase, start by similarity                                                                                                            |
| <a href="#">KLLA0C03938g</a> | some similarities with sgdI50002 <i>Saccharomyces cerevisiae</i> YDL021c hypothetical start                                                                                                                              |
| <a href="#">CAGL0M08360g</a> | some similarities with splP3897 <i>Saccharomyces cerevisiae</i> YJL161c ser/thr protein kinase, hypothetical start                                                                                                       |
| <a href="#">YALI0E34375g</a> | similar to wilNCU00108.1 <i>Neurospora crassa</i> NCU00108.1 hypothetical protein (93222 - 91750), hypothetical start                                                                                                    |
|                              | weakly similar to splP32944                                                                                                                                                                                              |

|                              |                                                                                                                                                      |
|------------------------------|------------------------------------------------------------------------------------------------------------------------------------------------------|
| <a href="#">KLLA0B07579g</a> | Saccharomyces cerevisiae YJL18 SWE1 ser/tyr dual-specificity protein kinase, start by similarity                                                     |
| <a href="#">YALI0D25388g</a> | similar to trlQ8TFN2 Pichia angustissima Serine-threonine kinase Pdd7p hypothetical start                                                            |
| <a href="#">DEHA0C04840g</a> | some similarities with splP3899 Saccharomyces cerevisiae YPL20 IPL1 ser/thr protein kinase, hypothetical start                                       |
| <a href="#">YALI0B00880g</a> | similar to splP22211 Saccharomyces cerevisiae YNL183c NPR1 ser/thr protein kinase, hypothetical start                                                |
| <a href="#">YALI0D08822g</a> | some similarities with splP3899 Saccharomyces cerevisiae YER12 PAK1 DNA polymerase alpha suppressing protein kinase, hypothetical start              |
| <a href="#">DEHA0G22440g</a> | similar to CA4770IPF9382.3 Candida albicans IPF9382.3, hypothetical start                                                                            |
| <a href="#">KLLA0C08525g</a> | similar to splP53599 Saccharomyces cerevisiae YNR031c SSK2 MAP kinase kinase of the high osmolarity signal transduction pathway, start by similarity |
| <a href="#">YALI0F09746g</a> | similar to splP24583 Saccharomyces cerevisiae YBL105c PKC1 ser/thr protein kinase, start by similarity                                               |
| <a href="#">DEHA0D07601g</a> | similar to Candida albicans CA42 ser/thr protein kinase, start by similarity                                                                         |
| <a href="#">CAGL0I07513g</a> | similar to splQ12236 Saccharomyces cerevisiae YOL100w PKH2, start by similarity                                                                      |
| <a href="#">DEHA0D11242g</a> | highly similar to CA5299IPF2190 Candida albicans IPF2190, start by similarity                                                                        |
| <a href="#">DEHA0F26994g</a> | similar to CA0206IPF14089 Candida albicans IPF14089 putative serine/threonine protein kinase, hypothetical start                                     |
| <a href="#">CAGL0M09361g</a> | highly similar to splP24583 Saccharomyces cerevisiae YBL105c PKC1 ser/thr protein kinase, start by similarity                                        |
| <a href="#">YALI0E06501g</a> | similar to splP12688 Saccharomyces cerevisiae YKL126w YPK1 ser/thr specific protein kinase, hypothetical start                                       |
| <a href="#">CAGL0K05709g</a> | similar to splQ12263 Saccharomyces cerevisiae YDR507c GIN4, start by similarity                                                                      |
| <a href="#">DEHA0C09130g</a> | similar to splP38147 Saccharomyces cerevisiae YBR274w CHK1, hypothetical start                                                                       |
| <a href="#">CAGL0M02299g</a> | similar to trlQ12152 Saccharomyces cerevisiae YPL150w, start by similarity                                                                           |
| <a href="#">CAGL0B04301g</a> | similar to splP38070 Saccharomyces cerevisiae YBR028c, start by similarity                                                                           |
| <a href="#">CAGL0I03432g</a> | similar to splP53974 Saccharomyces cerevisiae YNL020c ARK1 or splP4099 Saccharomyces cerevisiae YIL097 PRK1, start by similarity                     |
| <a href="#">DEHA0D13706g</a> | similar to CA4864IPF4087 Candida albicans IPF4087, hypothetical start                                                                                |
| <a href="#">KLLA0D09328g</a> | some similarities with splP3899 Saccharomyces cerevisiae YER12 PAK1 DNA polymerase alpha suppressing protein kinase, hypothetical start              |
| <a href="#">DEHA0B13519g</a> | some similarities with splP5373 Saccharomyces cerevisiae YNR040 related to ser/thr protein kinases, hypothetical start                               |
| <a href="#">CAGL0M02510g</a> | highly similar to trlQ03002 Saccharomyces cerevisiae YPL141                                                                                          |



|  |  |  |  |  |  |  |  |  |  |  |                              |                                                                                                                                                               |
|--|--|--|--|--|--|--|--|--|--|--|------------------------------|---------------------------------------------------------------------------------------------------------------------------------------------------------------|
|  |  |  |  |  |  |  |  |  |  |  | <a href="#">CAGL0M02312g</a> | spIQ01919 <i>Saccharomyces cerevisiae</i> YOR233w KIN4, hypothetical start                                                                                    |
|  |  |  |  |  |  |  |  |  |  |  | <a href="#">CAGL0G04609g</a> | similar to spIQ12236 <i>Saccharomyces cerevisiae</i> YOL100w PKH2, hypothetical start                                                                         |
|  |  |  |  |  |  |  |  |  |  |  | <a href="#">KLLA0F23155g</a> | similar to spIP22517 <i>Saccharomyces cerevisiae</i> YOL016c CMK2 Ca <sup>2+</sup> /calmodulin-dependent ser/thr protein kinase, type II, start by similarity |
|  |  |  |  |  |  |  |  |  |  |  | <a href="#">KLLA0F11319g</a> | similar to sgdlS0006071 <i>Saccharomyces cerevisiae</i> YPL150w, start by similarity                                                                          |
|  |  |  |  |  |  |  |  |  |  |  | <a href="#">CAGL0L07810g</a> | similar to spIP25333 <i>Saccharomyces cerevisiae</i> YCR008w SAT4 serine/threonine-specific protein kinase, start by similarity                               |
|  |  |  |  |  |  |  |  |  |  |  | <a href="#">CAGL0K11550g</a> | similar to spIP28708 <i>Saccharomyces cerevisiae</i> YKL116c, hypothetical start                                                                              |
|  |  |  |  |  |  |  |  |  |  |  | <a href="#">YALI0F11385g</a> | weakly similar to SPIP38691 <i>Saccharomyces cerevisiae</i> YHR082c KSP1 ser/thr protein kinase and DEIPF5974.1, start by similarity                          |
|  |  |  |  |  |  |  |  |  |  |  | <a href="#">KLLA0A09713g</a> | similar to spIQ03533 <i>Saccharomyces cerevisiae</i> YMR291w, start by similarity                                                                             |
|  |  |  |  |  |  |  |  |  |  |  | <a href="#">KLLA0E17127g</a> | similar to spIP38691 <i>Saccharomyces cerevisiae</i> YHR082c KSP1 ser/thr protein kinase, start by similarity                                                 |
|  |  |  |  |  |  |  |  |  |  |  | <a href="#">YALI0C04158g</a> | similar to spIP18961 <i>Saccharomyces cerevisiae</i> Serine/threonine-protein kinase YPK2/YKR2, hypothetical start                                            |
|  |  |  |  |  |  |  |  |  |  |  | <a href="#">DEHA0F24676g</a> | similar to spIP24719 <i>Saccharomyces cerevisiae</i> YOR351c MEK1 ser/thr protein kinase                                                                      |
|  |  |  |  |  |  |  |  |  |  |  | <a href="#">DEHA0G14817g</a> | similar to CA26431CaHSL1 <i>Candida albicans</i> CaHSL1, hypothetical start                                                                                   |
|  |  |  |  |  |  |  |  |  |  |  | <a href="#">DEHA0C18150g</a> | similar to spIP40494 <i>Saccharomyces cerevisiae</i> YIL095w PRK1 serine/threonine protein kinase, start by similarity                                        |
|  |  |  |  |  |  |  |  |  |  |  | <a href="#">CAGL0K10604g</a> | similar to spIP27466 <i>Saccharomyces cerevisiae</i> YFR014c CMK1 Ca <sup>2+</sup> /calmodulin-dependent ser/thr protein kinase type I, hypothetical start    |
|  |  |  |  |  |  |  |  |  |  |  | <a href="#">DEHA0C08591g</a> | similar to spIP22204 <i>Saccharomyces cerevisiae</i> YGR092w DBF2, hypothetical start, sequence gap                                                           |
|  |  |  |  |  |  |  |  |  |  |  | <a href="#">YALI0F13629g</a> | some similarities with spIP2356 <i>Saccharomyces cerevisiae</i> YLR362c STE11 ser/thr protein kinase of the MEKK family, hypothetical start                   |
|  |  |  |  |  |  |  |  |  |  |  | <a href="#">KLLA0C06138g</a> | similar to spIP32562 <i>Saccharomyces cerevisiae</i> YMR001c CDC5 involved in regulation of DNA replication, start by similarity                              |
|  |  |  |  |  |  |  |  |  |  |  | <a href="#">YALI0F16159g</a> | some similarities with wilNCU0091 <i>Neurospora crassa</i> NCU00914, hypothetical protein, hypothetical start                                                 |
|  |  |  |  |  |  |  |  |  |  |  | <a href="#">CAGL0K08514g</a> | similar to spIP34244 <i>Saccharomyces cerevisiae</i> YKL101w serine/threonine protein kinase, hypothetical start                                              |
|  |  |  |  |  |  |  |  |  |  |  | <a href="#">DEHA0F25278g</a> | similar to calCA1881CaRCK2 <i>Candida albicans</i> CaRCK2 Ca/calmodulin-dependent ser/thr protein kinase (no homology), hypothetical start                    |
|  |  |  |  |  |  |  |  |  |  |  | <a href="#">KLLA0F26983g</a> | some similarities with spIP3280 <i>Saccharomyces cerevisiae</i> YKL042c ELM1 ser/thr-specific protein kinase, hypothetical start                              |
|  |  |  |  |  |  |  |  |  |  |  | <a href="#">DEHA0C11484g</a> | similar to spIP22211 <i>Saccharomyces cerevisiae</i> YNL183c NPR1 or trIQ1 <i>Saccharomyces cerevisiae</i> YDL022c, hypothetical start                        |
|  |  |  |  |  |  |  |  |  |  |  | <a href="#">YALI0C00891g</a> | similar to spIO14019 <i>Schizosaccharomyces pombe</i> ProbK1 serine/threonine-protein kinase                                                                  |

|                              |                                                                                                                                                                                                                        |
|------------------------------|------------------------------------------------------------------------------------------------------------------------------------------------------------------------------------------------------------------------|
|                              | C29A4.16 (EC 2.7.1.-), hypothetical                                                                                                                                                                                    |
| <a href="#">KLLA0F23507g</a> | similar to splP24719 Saccharomyces cerevisiae YOR351c MEK1 ser/thr protein kinase, start by similarity                                                                                                                 |
| <a href="#">CAGL0F03245g</a> | similar to splP32361 Saccharomyces cerevisiae YHR079c IRE1, hypothetical start                                                                                                                                         |
| <a href="#">CAGL0K11990g</a> | some similarities with splP3808 Saccharomyces cerevisiae YBR05AKL1 Ark-family Kinase-Like protein kinase, hypothetical start                                                                                           |
| <a href="#">DEHA0G10417g</a> | similar to CA1971CaPKH2 Candida albicans CaPKH2 Ser/Thr protein kinase (by homology), hypothetical                                                                                                                     |
| <a href="#">YALI0B17556g</a> | weakly similar to trlQ9Y898 Emering nidulans Calcium/calmodulin dependent protein kinase C, hypothetical start                                                                                                         |
| <a href="#">CAGL0G03047g</a> | highly similar to splP22204 Saccharomyces cerevisiae YGR09DBF2 ser/thrprotein kinase or splP3 Saccharomyces cerevisiae YPR11DBF20, hypothetical start                                                                  |
| <a href="#">YALI0F27093g</a> | weakly similar to DEHA-IPF372 Debaromyces hansenii, hypothetical start                                                                                                                                                 |
| <a href="#">DEHA0C14091g</a> | similar to splP37292 Saccharomyces cerevisiae YBR263w SHM1, hypothetical start                                                                                                                                         |
| <a href="#">DEHA0C18601g</a> | similar to CA4433CaBCK1 Candida albicans, hypothetical start                                                                                                                                                           |
| <a href="#">KLLA0C04213g</a> | similar to splP22209 Saccharomyces cerevisiae YAR018c KIN3 ser/thr protein kinase, hypothetical start                                                                                                                  |
| <a href="#">YALI0A04697g</a> | similar to splO42626 Neurospora crassa Serine/threonine-protein kinase nr (Nonrepressible conidiation protein), hypothetical start                                                                                     |
| <a href="#">YALI0D26015g</a> | similar to splP32562 Saccharomyces cerevisiae Cell cycle protein kinase CDC5/MSD2 (EC 2.7.1.-), hypothetical start                                                                                                     |
| <a href="#">DEHA0G14839g</a> | highly similar to sCA3870CaYP Candida albicans CaYPK1, start similarity                                                                                                                                                |
| <a href="#">KLLA0C14278g</a> | similar to splP28708 Saccharomyces cerevisiae YKL116c, hypothetical                                                                                                                                                    |
| <a href="#">YALI0E13750g</a> | similar to trlCAD79666 Neurospora crassa B1D14.230 Related to serine/threonine-protein kinase a DEHA-IPF6149.1 Debaromyces hansenii, no start                                                                          |
| <a href="#">CAGL0B04147g</a> | highly similar to splP22204 Saccharomyces cerevisiae YGR09DBF2 ser/thrprotein kinase related DBF20P or splP32328 Saccharomyces cerevisiae YPR111w DBF20 cell cycle protein kinase related to DBF20, hypothetical start |
| <a href="#">DEHA0F13497g</a> | similar to calCA1299CaPTK2 Candida albicans CaPTK2 serine /threonine protein kinase involved in polyamine uptake (by homology), hypothetical                                                                           |
| <a href="#">DEHA0D13684g</a> | similar to CA4865IPF4085 Candida albicans IPF4085, start by similarity                                                                                                                                                 |
| <a href="#">CAGL0L06006g</a> | similar to splP53104 Saccharomyces cerevisiae YGL180w APG1 essential for autophagocytosis, hypothetical start                                                                                                          |
| <a href="#">CAGL0E05720g</a> | similar to splP38991 Saccharomyces cerevisiae YPL209c IPL1 ser/thr protein kinase, start by similarity                                                                                                                 |
| <a href="#">KLLA0F18612g</a> | some similarities with splP3808 Saccharomyces cerevisiae YBR05AKL1 Ark-family Kinase-Like protein kinase, hypothetical start                                                                                           |

|                              |                                                                                                                                                                    |
|------------------------------|--------------------------------------------------------------------------------------------------------------------------------------------------------------------|
| <a href="#">YAL10E24563g</a> | similar to trlQ12152 Saccharomyces cerevisiae YPL150w, hypothetical start                                                                                          |
| <a href="#">DEHA0E24013g</a> | similar to calCA5226CaRIM15 Candida albicans CaRIM15 Protein kinase involved in the RIM pathway (by homology), hypothetical start                                  |
| <a href="#">CAGL0I04422g</a> | some similarities with splP2220 Saccharomyces cerevisiae YAR0 KIN3 ser/thr protein kinase, hypothetical start                                                      |
| <a href="#">CAGL0K01661g</a> | some similarities with trlQ1210 Saccharomyces cerevisiae YDL02 hypothetical start                                                                                  |
| <a href="#">DEHA0E15741g</a> | highly similar to CA3361CaSNF1 Candida albicans CaSNF1 serine/threonine protein kinase hypothetical start                                                          |
| <a href="#">CAGL0M02233g</a> | highly similar to splP22216 Saccharomyces cerevisiae YPL15 SPK1 ser/thr/tyr protein kinase hypothetical start                                                      |
| <a href="#">CAGL0F04741g</a> | similar to splP22517 Saccharomyces cerevisiae YOL016c CMK2 Ca <sup>2+</sup> /calmodulin-dependent ser/thr protein kinase, type II, hypothetical start              |
| <a href="#">YAL10E06523g</a> | weakly similar to splP34244 Saccharomyces cerevisiae YKL10 HSL1 ser/thr protein kinase, coupled septin ring assembly to cell cycle progression, hypothetical start |
| <a href="#">KLLA0E11979g</a> | some similarities with splP25333 Saccharomyces cerevisiae YCR00 SAT4 serine/threonine-specific protein kinase, hypothetical start                                  |
| <a href="#">CAGL0J11308g</a> | similar to splP22211 Saccharomyces cerevisiae YNL183c NPR1 ser/thr protein kinase, hypothetical start                                                              |
| <a href="#">DEHA0G11638g</a> | similar to splP25333 Saccharomyces cerevisiae YCR008w SAT4 serine/threonine-specific protein kinase, hypothetical start                                            |
| <a href="#">CAGL0H10208g</a> | similar to splP38080 Saccharomyces cerevisiae YBR059c AKL1 Ark-fam Kinase-Like protein, hypothetical start                                                         |
| <a href="#">CAGL0B02739g</a> | similar to splP23561 Saccharomyces cerevisiae YLR362w STE11 ser/thr protein kinase of the MEKK family, hypothetical start                                          |
| <a href="#">YAL10D07150g</a> | weakly similar to trlQ9C2E8 Neurospora crassa Conserved hypothetical protein, start by similarity                                                                  |
| <a href="#">DEHA0F10197g</a> | highly similar to calCA2265CaCMK2 Candida albicans CaCMK2 Ca <sup>2+</sup> /calmodulin-dependent ser/thr protein kinase, type II (by homology), hypothetical start |
| <a href="#">DEHA0B12628g</a> | similar to splP06245 Saccharomyces cerevisiae YPL203w TPK2 cAMP-dependent protein kinase 2, catalytic chain, start by similarity                                   |
| <a href="#">DEHA0E13574g</a> | similar to CA2193IPF14273 Candida albicans IPF14273 Probable ser/thr protein kinase                                                                                |
| <a href="#">KLLA0D07348g</a> | weakly similar to sgdIS000606 Saccharomyces cerevisiae YPL14 start by similarity                                                                                   |
| <a href="#">DEHA0B12650g</a> | some similarities with splP3897 Saccharomyces cerevisiae YJL16 HAL5 ser/thr protein kinase, hypothetical start                                                     |
| <a href="#">DEHA0F04114g</a> | similar to CA0576CaNPR1 Candida albicans CaNPR1, hypothetical start                                                                                                |
| <a href="#">DEHA0C13211g</a> | similar to splP22216 Saccharomyces cerevisiae YPL153c SPK1, hypothetical start                                                                                     |

|                              |                                                                                                                                                                                                |
|------------------------------|------------------------------------------------------------------------------------------------------------------------------------------------------------------------------------------------|
| <a href="#">KLLA0B07205g</a> | some similarities with splP0598 Saccharomyces cerevisiae YKL103 TPK3 cAMP-dependent protein kinase catalytic chain, hypothetical start                                                         |
| <a href="#">CAGL0K06479g</a> | some similarities with trlQ0330 Saccharomyces cerevisiae YDR464c start by similarity                                                                                                           |
| <a href="#">KLLA0C12485g</a> | weakly similar to splQ12236 Saccharomyces cerevisiae YOL100 PKH2, start by similarity                                                                                                          |
| <a href="#">KLLA0E06413g</a> | gil22858696 gblAAN05732.1 Kluveromyces lactis protein kinase start by similarity                                                                                                               |
| <a href="#">YALI0D26213g</a> | weakly similar to trlQ96WJ8 Blumoglomeris Protein kinase C-like protein hypothetical start                                                                                                     |
| <a href="#">DEHA0G14707g</a> | similar to CA6135 CaCMK1 Candida albicans CaCMK1, hypothetical start                                                                                                                           |
| <a href="#">DEHA0E16115g</a> | similar to CA5074 IPF3607 Candida albicans IPF3607 putative serine/threonine protein kinase hypothetical start                                                                                 |
| <a href="#">CAGL0M13167g</a> | similar to splP32801 Saccharomyces cerevisiae YKL048c ELM1 serine/threonine specific protein kinase, hypothetical start                                                                        |
| <a href="#">KLLA0F01408g</a> | weakly similar to sgd S000218.1 Saccharomyces cerevisiae YDL022c hypothetical start                                                                                                            |
| <a href="#">DEHA0F25212g</a> | highly similar to trlQ9HEW0 Candida albicans cAMP-dependent protein kinase catalytic subunit, hypothetical start                                                                               |
| <a href="#">CAGL0M08404g</a> | some similarities with splP0598 Saccharomyces cerevisiae YKL103 TPK3 or splP06244 Saccharomyces cerevisiae YJL164c SRA3 or splP06244 Saccharomyces cerevisiae YPL202c TPK2, hypothetical start |
| <a href="#">KLLA0A03806g</a> | gil2181934 lemb CAA61235.1 Kluveromyces lactis putative kinase start by similarity                                                                                                             |
| <a href="#">YALI0D19470g</a> | similar to trlQ871H9 Neurospora crassa B16M17.090 Related to Ste20-like protein kinase Don3, hypothetical start                                                                                |
| <a href="#">YALI0A10230g</a> | similar to splP22211 Saccharomyces cerevisiae YNL183c NPR1 serine/threonine protein kinase, start by similarity                                                                                |
| <a href="#">DEHA0F10461g</a> | some similarities with calCA1288 CaKSP1 Candida albicans CaKSP1 SERINE/THREONINE PROTEIN KINASE by homology hypothetical start                                                                 |
| <a href="#">YALI0F01716g</a> | trlQ9P860 Yarrowia lipolytica Wee1 protein, mitosis inhibitor protein kinase hypothetical start                                                                                                |
| <a href="#">YALI0E27632g</a> | trlO93955 Yarrowia lipolytica SSF1 protein, multicopy suppressor of Ssr1 secretory defects, putative calmodulin dependent ser/thr protein kinase identified start                              |
| <a href="#">CAGL0I09504g</a> | similar to splP38147 Saccharomyces cerevisiae YBR274w CHK1 regulatory inhibitory Cdk phosphorylation of Fhl1 start by similarity                                                               |
| <a href="#">CAGL0F09075g</a> | similar to splP11792 Saccharomyces cerevisiae YHR205w SCH9 serine/threonine protein kinase, start by similarity                                                                                |
| <a href="#">DEHA0C17996g</a> | similar to CA2348 IPF12811 Candida albicans, putative serine/threonine kinase, hypothetical start                                                                                              |
| <a href="#">CAGL0H00979g</a> | similar to trlQ12003 Saccharomyces cerevisiae YPL236c, hypothetical start                                                                                                                      |
| <a href="#">KLLA0C03828g</a> | similar to splP54199 Saccharomyces cerevisiae YDL028c MPS1                                                                                                                                     |

|  |  |  |  |  |  |  |  |  |  |                              |                                                                                                                                                                                    |
|--|--|--|--|--|--|--|--|--|--|------------------------------|------------------------------------------------------------------------------------------------------------------------------------------------------------------------------------|
|  |  |  |  |  |  |  |  |  |  | <a href="#">KLLA0C03620g</a> | serine/threonine/tyrosine protein kinase, hypothetical start                                                                                                                       |
|  |  |  |  |  |  |  |  |  |  | <a href="#">KLLA0F14190g</a> | gil3021329 embl CAA06336.1 Kluyveromyces lactis MAP kinase kinase, start by similarity                                                                                             |
|  |  |  |  |  |  |  |  |  |  | <a href="#">CAGL0M10153g</a> | some similarities with splQ0349 Saccharomyces cerevisiae YHL001 ser/thr protein kinase of the pheromone pathway, hypothetical start                                                |
|  |  |  |  |  |  |  |  |  |  | <a href="#">KLLA0F24618g</a> | similar to splP38070 Saccharomyces cerevisiae YBR028c, start by similarity                                                                                                         |
|  |  |  |  |  |  |  |  |  |  | <a href="#">CAGL0K07458g</a> | similar to splP12688 Saccharomyces cerevisiae YKL126w or splP1899 Saccharomyces cerevisiae YMR101 ser/thr-specific protein kinases, start by similarity                            |
|  |  |  |  |  |  |  |  |  |  | <a href="#">KLLA0D03190g</a> | highly similar to splP06245 Saccharomyces cerevisiae YPL2014 TPK2 cAMP-dependent protein kinase catalytic chain, start by similarity                                               |
|  |  |  |  |  |  |  |  |  |  | <a href="#">DEHA0D19833g</a> | similar to CA5851 CaKIN2 Candida albicans CaKIN2, hypothetical start                                                                                                               |
|  |  |  |  |  |  |  |  |  |  | <a href="#">KLLA0D14905g</a> | gil28565036 gb AAO32601.1 Kluyveromyces lactis DBF2, start by similarity                                                                                                           |
|  |  |  |  |  |  |  |  |  |  | <a href="#">KLLA0C18568g</a> | gil6967028 embl CAB72435.1 Kluyveromyces lactis MUP1 protein kinase, hypothetical start                                                                                            |
|  |  |  |  |  |  |  |  |  |  | <a href="#">CAGL0M13541g</a> | similar to splQ03533 Saccharomyces cerevisiae YMR291w, hypothetical start                                                                                                          |
|  |  |  |  |  |  |  |  |  |  | <a href="#">KLLA0E03487g</a> | similar to sgdlS0002874 Saccharomyces cerevisiae YDR466w, start by similarity                                                                                                      |
|  |  |  |  |  |  |  |  |  |  | <a href="#">DEHA0C08635g</a> | similar to splP22204 Saccharomyces cerevisiae YGR092w DBF2, hypothetical start, sequence gap                                                                                       |
|  |  |  |  |  |  |  |  |  |  | <a href="#">CAGL0G02607g</a> | similar to splP40494 Saccharomyces cerevisiae YIL095w PRK1, start by similarity                                                                                                    |
|  |  |  |  |  |  |  |  |  |  | <a href="#">CAGL0K11275g</a> | similar to trlQ03785 Saccharomyces cerevisiae YDR247w, hypothetical start                                                                                                          |
|  |  |  |  |  |  |  |  |  |  | <a href="#">DEHA0E05753g</a> | similar to CA0719 IPF9779.5 Candida albicans IPF9779.5 serine/threonine protein kinase 5-prime end, hypothetical start                                                             |
|  |  |  |  |  |  |  |  |  |  | <a href="#">YALI0B05588g</a> | some similarities with splQ1223 Saccharomyces cerevisiae YOL101 PKH2 related to ser/thr protein kinase P108.1.f16.1, hypothetical start                                            |
|  |  |  |  |  |  |  |  |  |  | <a href="#">DEHA0A08822g</a> | similar to CA0577 IPF16051 Candida albicans IPF16051 unknown function, start by similarity                                                                                         |
|  |  |  |  |  |  |  |  |  |  | <a href="#">KLLA0C17160g</a> | similar to splP53104 Saccharomyces cerevisiae YGL180w APG1 essential for autophagocytosis, start by similarity                                                                     |
|  |  |  |  |  |  |  |  |  |  | <a href="#">KLLA0A02717g</a> | some similarities with splP5323 Saccharomyces cerevisiae YGR051, hypothetical start                                                                                                |
|  |  |  |  |  |  |  |  |  |  | <a href="#">YALI0C21758g</a> | similar to KLLA-IPF4914.1 Kluyveromyces lactis IPF 4914, hypothetical start                                                                                                        |
|  |  |  |  |  |  |  |  |  |  | <a href="#">CAGL0C03509g</a> | similar to splP53739 Saccharomyces cerevisiae YNR047w or splP2533 Saccharomyces cerevisiae YCR091 KIN82, hypothetical start                                                        |
|  |  |  |  |  |  |  |  |  |  | <a href="#">KLLA0B03586g</a> | similar to splP11792 Saccharomyces cerevisiae YHR205w SCH9 serine/threonine protein kinase involved in stress response and nutrient-sensing signaling pathway, start by similarity |
|  |  |  |  |  |  |  |  |  |  | <a href="#">YALI0C15444g</a> | similar to trlQ12706 Schizosaccharomyces pombe Proboscidea serine/threonine protein kinase PSK1 (EC 2.7.1.-), hypothetical start                                                   |
|  |  |  |  |  |  |  |  |  |  |                              | weakly similar to DEHA-IPF394                                                                                                                                                      |

[KIN1 \(YDR122W\)](#)

[2.7.1.-](#)

splP13185 Saccharomyces cerevisiae YDR122w KIN1 ser/thr protein kinase P108.1.f9.1

Exhibits sensitivity at 5 generations when grown in synthetic complete medium.

NA

NA

NA

NA

NA

NA

scdky

57 58  
49 54  
42

[GLC.2](#)

|                              |                                                                                                                                                                                    |
|------------------------------|------------------------------------------------------------------------------------------------------------------------------------------------------------------------------------|
| <a href="#">YAL10E34067g</a> | Debaryomyces hansenii IPF 394<br>hypothetical start                                                                                                                                |
| <a href="#">CAGL0C05005g</a> | similar to splP27636 Saccharomyces cerevisiae YAR019c CDC15, hypothetical start                                                                                                    |
| <a href="#">DEHA0B04895g</a> | similar to CA2018CaSTE11 Candida albicans CaSTE11 ser/thr protein kinase of the MEKK family, hypothetical                                                                          |
| <a href="#">KLLA0B12716g</a> | similar to splP12688 Saccharomyces cerevisiae YKL126w YPK1 ser/thr specific protein kinase, start by similarity                                                                    |
| <a href="#">CAGL0F03707g</a> | similar to splQ08732 Saccharomyces cerevisiae YOR267c, start by similarity                                                                                                         |
| <a href="#">YAL10E22858g</a> | Weakly similar to CAAL-CA55 Candida albicans CaAKL1 serine/threonine protein kinase (by homology), Hypothetical start                                                              |
| <a href="#">KLLA0F09031g</a> | similar to splP43565 Saccharomyces cerevisiae YFL033c RIM15 protein kinase involved in expression of meiotic genes, hypothetical start                                             |
| <a href="#">DEHA0E12782g</a> | similar to splP38070 Saccharomyces cerevisiae YBR028c, putative ribosomal protein kinase                                                                                           |
| <a href="#">CAGL0B01925g</a> | similar to splP13185 Saccharomyces cerevisiae YDR122w KIN1 or splP13186 Saccharomyces cerevisiae YLR096w KIN2, hypothetical start                                                  |
| <a href="#">KLLA0C07535g</a> | some similarities with sgdI500057 Saccharomyces cerevisiae YOR267c, hypothetical start                                                                                             |
| <a href="#">CAGL0D02244g</a> | similar to splP24719 Saccharomyces cerevisiae YOR351c MEK1 ser/thr protein kinase, hypothetical start                                                                              |
| <a href="#">DEHA0C13387g</a> | similar to trlQ08732 Saccharomyces cerevisiae YOR267C, hypothetical                                                                                                                |
| <a href="#">YAL10E17743g</a> | no similarity, hypothetical start                                                                                                                                                  |
| <a href="#">CAGL0C02893g</a> | similar to trlQ08732 Saccharomyces cerevisiae YOR267c, hypothetical                                                                                                                |
| <a href="#">KLLA0F19536g</a> | similar to splP13186 Saccharomyces cerevisiae YLR096w KIN2 ser/thr protein kinase, start by similarity                                                                             |
| <a href="#">CAGL0M11396g</a> | similar to splP13186 Saccharomyces cerevisiae YLR096w KIN2 ser/thr protein kinase, hypothetical start                                                                              |
| <a href="#">YAL10B13178g</a> | similar to splP32490 Saccharomyces cerevisiae YOR231w MKK1 ser/thr protein kinase, start by similarity                                                                             |
| <a href="#">DEHA0F27489g</a> | similar to CA12881CaKSP1 Candida albicans CaKSP1 serine/threonine protein kinase (by homology), start by similarity                                                                |
| <a href="#">KLLA0B02332g</a> | similar to splP38991 Saccharomyces cerevisiae YPL209c IPL1 ser/thr protein kinase, start by similarity                                                                             |
| <a href="#">CAGL0L07326g</a> | similar to splP39009 Saccharomyces cerevisiae YDL101c DUN1 protein kinase, start by similarity                                                                                     |
| <a href="#">KLLA0F11143g</a> | similar to splP22216 Saccharomyces cerevisiae YPL153c SPK1 ser/thr protein kinase, start by similarity                                                                             |
| <a href="#">DEHA0E14641g</a> | similar to CA4097CaGIN4 Candida albicans CaGIN4 ser/thr protein kinase (by homology), hypothetical start                                                                           |
| <a href="#">CAGL0J03872g</a> | similar to splQ01919 Saccharomyces cerevisiae YOR233w KIN4 ser/thr protein kinase or trlQ03002 Saccharomyces cerevisiae YPL147w start by similarity                                |
| <a href="#">YAL10D14542g</a> | similar to splP11792 Saccharomyces cerevisiae YHR205w SCH9 serine/threonine protein kinase involved in stress response and nutrient-sensing signaling pathway, start by similarity |

|                              |                                                                                                                                                                                             |
|------------------------------|---------------------------------------------------------------------------------------------------------------------------------------------------------------------------------------------|
| <a href="#">KLLA0B06501g</a> | some similarities with splP4711 Saccharomyces cerevisiae YJR05 PTK2 involved in polyamine uptake hypothetical start                                                                         |
| <a href="#">DEHA0C05742g</a> | some similarities with splP4189 Schizosaccharomyces pombe Cell division control protein 7 and CA2669 IPF17494.3eoc Candida albicans and CA2404 CaCDC15 Candida albicans, hypothetical start |
| <a href="#">DEHA0F20878g</a> | similar to CA0044 IPF17347 Candida albicans IPF17347, hypothetical start                                                                                                                    |
| <a href="#">KLLA0E08371g</a> | similar to splP40494 Saccharomyces cerevisiae YIL095w PRK1 serine/threonine protein kinase involved in regulation of actin cytoskeleton organization, start by similarity                   |
| <a href="#">KLLA0F13552g</a> | gil33386566 lemb CAD87727.1 Kluyveromyces lactis protein kinase start by similarity                                                                                                         |
| <a href="#">CAGL0J11638g</a> | highly similar to splP32562 Saccharomyces cerevisiae YMR0 CDC5 involved in regulation of DNA replication, hypothetical start                                                                |
| <a href="#">CAGL0K02167g</a> | similar to splP38990 Saccharomyces cerevisiae YER129w Serine/threonine protein kinase, start by similarity                                                                                  |
| <a href="#">DEHA0F09493g</a> | similar to calCA2909 IPF11424 Candida albicans IPF11424 unknown function hypothetical start                                                                                                 |
| <a href="#">CAGL0G05720g</a> | similar to splP22211 Saccharomyces cerevisiae YNL183c NPR1 serine/threonine protein kinase, start by similarity                                                                             |
| <a href="#">DEHA0C09823g</a> | similar to CA1205 CaSSK2 Candida albicans, hypothetical start                                                                                                                               |
| <a href="#">YALI0D22770g</a> | Similar to CAAL-CA5851 Candida ser/thr protein kinase (by homology) start                                                                                                                   |
| <a href="#">CAGL0M08910g</a> | highly similar to splQ00372 Saccharomyces cerevisiae YDR47 carbon catabolite derepressing serine/threonine protein kinase, hypothetical start                                               |
| <a href="#">KLLA0C04191g</a> | weakly similar to splP27636 Saccharomyces cerevisiae YAR0 CDC15 protein kinase of the MAP kinase kinase kinase family, hypothetical start                                                   |
| <a href="#">DEHA0B16071g</a> | similar to splP22209 Saccharomyces cerevisiae YAR018c KIN3 ser/thr protein kinase, start by similarity                                                                                      |
| <a href="#">CAGL0K03399g</a> | highly similar to splP12688 Saccharomyces cerevisiae YKL12 Serine/threonine-protein kinase, start by similarity                                                                             |
| <a href="#">CAGL0J04972g</a> | some similarities with trlQ1210 Saccharomyces cerevisiae YDL02 hypothetical start                                                                                                           |
| <a href="#">DEHA0F10923g</a> | highly similar to calCA2986 CaCDC5 Candida albicans CaCDC5 Cell-cycle protein kinase (by homology), start by similarity                                                                     |
| <a href="#">YALI0B04840g</a> | similar to trlQ12003 Saccharomyces cerevisiae YPL236c, start by similarity                                                                                                                  |
| <a href="#">KLLA0C01650g</a> | similar to splQ12263 Saccharomyces cerevisiae YDR507c GIN4 ser/thr protein kinase, start by similarity                                                                                      |
| <a href="#">YALI0F08165g</a> | some similarities with splP4189 Schizosaccharomyces pombe Cell division control protein 7 OR SPBC21.06C gene Cell division control protein, start by similarity                             |
| <a href="#">KLLA0E01584g</a> | highly similar to splP39009 Saccharomyces cerevisiae YDL10 DUN1 protein kinase, start by similarity                                                                                         |
| <a href="#">DEHA0C02822g</a> | similar to CA4039 CaSKS1 Candida                                                                                                                                                            |

|                              |                                                                                                                                                                                                        |
|------------------------------|--------------------------------------------------------------------------------------------------------------------------------------------------------------------------------------------------------|
| <a href="#">DEHA0C0282g</a>  | albicans, start by similarity                                                                                                                                                                          |
| <a href="#">KLLA0F01276g</a> | similar to splP38147 Saccharomyces cerevisiae YBR274w CHK1 regul inhibitory Cdk phosphorylation of F start by similarity                                                                               |
| <a href="#">CAGL0G09020g</a> | highly similar to splP06245 Saccharomyces cerevisiae YPL20 TPK2 cAMP-dependent protein kinase catalytic chain, hypothetical start                                                                      |
| <a href="#">DEHA0G16302g</a> | similar to trlQ12706 Schizosaccharomyces pombe Prob serine/threonine protein kinase PS start by similarity                                                                                             |
| <a href="#">CAGL0I06248g</a> | similar to splP38970 Saccharomyces cerevisiae YJL165c HAL5 ser/thr kinase, start by similarity                                                                                                         |
| <a href="#">YALI0B08558g</a> | weakly similar to trlQ00863 Neocryptosporidium haematococca Ran1-like protein kinase hypothetical start                                                                                                |
| <a href="#">DEHA0G05544g</a> | similar to CA1375IIPF7158 Candida albicans IPF7158 putative serine/threonine kinase, hypothetical start                                                                                                |
| <a href="#">KLLA0B13607g</a> | weakly similar to splQ03497 Saccharomyces cerevisiae YHL00 STE20 ser/thr protein kinase of t pheromone pathway, hypothetical start                                                                     |
| <a href="#">YALI0F27159g</a> | some similarities with splP4704 Saccharomyces cerevisiae YJL057c probable serine/threonine-protein kinase hypothetical start                                                                           |
| <a href="#">CAGL0I05390g</a> | similar to splQ12505 Saccharomyces cerevisiae YPL026c SKS1 suppressor kinase of SNF3 or trlQ03785 Saccharomyces cerevisiae YDR24 start by similarity                                                   |
| <a href="#">YALI0E31361g</a> | similar to trlQ9HF33 Arthrobotryopsis dactyloides Calmodulin-binding protein kinase, hypothetical start                                                                                                |
| <a href="#">YALI0B14201g</a> | similar to splP32328 Saccharomyces cerevisiae YPR111w DBF20 cell cycle protein kinase P108.1.f3.6 or splP2 Saccharomyces cerevisiae YGR09 DBF2 ser/thr protein kinase P108.1.f16.1, hypothetical start |
| <a href="#">DEHA0C16181g</a> | similar to CA1447ICaNRK1 Candida albicans, hypothetical start                                                                                                                                          |
| <a href="#">CAGL0K04301g</a> | similar to splP53233 Saccharomyces cerevisiae YGR052w, hypothetical start                                                                                                                              |
| <a href="#">KLLA0A06820g</a> | some similarities with splP38970 Saccharomyces cerevisiae YJL16 HAL5 ser/thr protein kinase, hypothetical start                                                                                        |
| <a href="#">KLLA0C00979g</a> | similar to splP08458 Saccharomyces cerevisiae YDR523c SPS1 ser/thr protein kinase, hypothetical start                                                                                                  |
| <a href="#">YALI0D02101g</a> | similar to splO94168 Candida tropicalis Carbon catabolite derepressing protein kinase (EC 2.7.1.-), hypothetical start                                                                                 |
| <a href="#">YALI0C08305g</a> | highly similar to splP06245 Saccharomyces cerevisiae YPL20 TPK2 cAMP-dependent protein kinase catalytic chain, hypothetical start                                                                      |
| <a href="#">KLLA0D12100g</a> | some similarities with sgdS00020 Saccharomyces cerevisiae YDR24 hypothetical start                                                                                                                     |
| <a href="#">CAGL0M10791g</a> | highly similar to splP53599 Saccharomyces cerevisiae YNR0 SSK2 MAP kinase, no start, frame                                                                                                             |
| <a href="#">YALI0A05247g</a> | similar to trlQ876Z5 Neurospora crassa OS-4 Putative SSK22 like MAP kinase, hypothetical start                                                                                                         |
| <a href="#">DEHA0F24684g</a> | similar to splP24719 Saccharomyces cerevisiae YOR351c MEK1 ser/thr protein kinase                                                                                                                      |



|                              |                                                                                                                                                             |
|------------------------------|-------------------------------------------------------------------------------------------------------------------------------------------------------------|
| <a href="#">KLLA0B13112g</a> | similar to splP23561 Saccharomyces cerevisiae YLR362w STE11 ser/thr protein kinase of the MEKK family, start by similarity                                  |
| <a href="#">CAGL0F03311g</a> | similar to splP38691 Saccharomyces cerevisiae YHR082c KSP1 ser/thr protein kinase, start by similarity                                                      |
| <a href="#">KLLA0C03938g</a> | some similarities with sgdIS00021 Saccharomyces cerevisiae YDL021c hypothetical start                                                                       |
| <a href="#">CAGL0M08360g</a> | some similarities with splP3897 Saccharomyces cerevisiae YJL166c ser/thr protein kinase, hypothetical start                                                 |
| <a href="#">YAL10E34375g</a> | similar to wilNCU00108.1 Neurospora crassa NCU00108.1 hypothetical protein (93222 - 91750), hypothetical start                                              |
| <a href="#">KLLA0B07579g</a> | weakly similar to splP32944 Saccharomyces cerevisiae YJL181c SWE1 ser/tyr dual-specificity protein kinase, start by similarity                              |
| <a href="#">YAL10D25388g</a> | similar to trlQ8TFN2 Pichia angustissima Serine-threonine kinase Pdd7p, hypothetical start                                                                  |
| <a href="#">DEHA0C04840g</a> | some similarities with splP3899 Saccharomyces cerevisiae YPL209c IPL1 ser/thr protein kinase, hypothetical start                                            |
| <a href="#">YAL10B00880g</a> | similar to splP22211 Saccharomyces cerevisiae YNL183c NPR1 ser/thr protein kinase, hypothetical start                                                       |
| <a href="#">YAL10D08822g</a> | some similarities with splP3899 Saccharomyces cerevisiae YER121c PAK1 DNA polymerase alpha primase suppressing protein kinase, hypothetical start           |
| <a href="#">DEHA0G22440g</a> | similar to CA4770IPF9382.3 Candida albicans IPF9382.3, hypothetical start                                                                                   |
| <a href="#">KLLA0C08525g</a> | similar to splP53599 Saccharomyces cerevisiae YNR031c SSK2 MAP kinase kinase of the high osmolarity growth signal transduction pathway, start by similarity |
| <a href="#">YAL10F09746g</a> | similar to splP24583 Saccharomyces cerevisiae YBL105c PKC1 ser/thr protein kinase, start by similarity                                                      |
| <a href="#">DEHA0D07601g</a> | similar to Candida albicans CA421c, start by similarity                                                                                                     |
| <a href="#">CAGL0I07513g</a> | similar to splQ12236 Saccharomyces cerevisiae YOL100w PKH2, start by similarity                                                                             |
| <a href="#">DEHA0D11242g</a> | highly similar to CA5299IPF219 Candida albicans IPF219, start by similarity                                                                                 |
| <a href="#">DEHA0F26994g</a> | similar to CA0206IPF14089 Candida albicans IPF14089 putative serine/threonine protein kinase, hypothetical start                                            |
| <a href="#">CAGL0M09361g</a> | highly similar to splP24583 Saccharomyces cerevisiae YBL105c PKC1 ser/thr protein kinase, start by similarity                                               |
| <a href="#">YAL10E06501g</a> | similar to splP12688 Saccharomyces cerevisiae YKL126w YPK1 ser/thr specific protein kinase, hypothetical start                                              |
| <a href="#">CAGL0K05709g</a> | similar to splQ12263 Saccharomyces cerevisiae YDR507c GIN4, start by similarity                                                                             |
| <a href="#">DEHA0C09130g</a> | similar to splP38147 Saccharomyces cerevisiae YBR274w CHK1, hypothetical start                                                                              |
| <a href="#">CAGL0M02299g</a> | similar to trlQ12152 Saccharomyces cerevisiae YPL150w, start by similarity                                                                                  |
| <a href="#">CAGL0B04301g</a> | similar to splP38070 Saccharomyces cerevisiae YBR028c, start by similarity                                                                                  |

|  |  |  |  |  |  |  |  |  |  |                              |                                                                                                                                                        |
|--|--|--|--|--|--|--|--|--|--|------------------------------|--------------------------------------------------------------------------------------------------------------------------------------------------------|
|  |  |  |  |  |  |  |  |  |  | <a href="#">CAGL0J03432g</a> | similar to splP53974 Saccharomyces cerevisiae YNL020c ARK1 or splP4 Saccharomyces cerevisiae YIL09 PRK1, start by similarity                           |
|  |  |  |  |  |  |  |  |  |  | <a href="#">DEHA0D13706g</a> | similar to CA4864IPF4087 Candida albicans IPF4087, hypothetical start                                                                                  |
|  |  |  |  |  |  |  |  |  |  | <a href="#">KLLA0D09328g</a> | some similarities with splP3899 Saccharomyces cerevisiae YER12 PAK1 DNA polymerase alpha suppressing protein kinase, hypothetical start                |
|  |  |  |  |  |  |  |  |  |  | <a href="#">DEHA0B13519g</a> | some similarities with splP5373 Saccharomyces cerevisiae YNR04 related to ser/thr protein kinases hypothetical start                                   |
|  |  |  |  |  |  |  |  |  |  | <a href="#">CAGL0M02519g</a> | highly similar to trlQ03002 Saccharomyces cerevisiae YPL141 splQ01919 Saccharomyces cerevisiae YOR233w KIN4, hypothetical start                        |
|  |  |  |  |  |  |  |  |  |  | <a href="#">CAGL0G04609g</a> | similar to splQ12236 Saccharomyces cerevisiae YOL100w PKH2, hypothetical start                                                                         |
|  |  |  |  |  |  |  |  |  |  | <a href="#">KLLA0F23155g</a> | similar to splP22517 Saccharomyces cerevisiae YOL016c CMK2 Ca <sup>2+</sup> /calmodulin-dependent ser/thr protein kinase, type II, start by similarity |
|  |  |  |  |  |  |  |  |  |  | <a href="#">KLLA0F11319g</a> | similar to sgdlS0006071 Saccharomyces cerevisiae YPL150w, start by similarity                                                                          |
|  |  |  |  |  |  |  |  |  |  | <a href="#">CAGL0L07810g</a> | similar to splP25333 Saccharomyces cerevisiae YCR008w SAT4 serine/threonine-specific protein kinase, start by similarity                               |
|  |  |  |  |  |  |  |  |  |  | <a href="#">CAGL0K11550g</a> | similar to splP28708 Saccharomyces cerevisiae YKL116c, hypothetical start                                                                              |
|  |  |  |  |  |  |  |  |  |  | <a href="#">YALI0F11385g</a> | weakly similar to SPIP38691 Saccharomyces cerevisiae YHR08 KSP1 ser/thr protein kinase and DE IPF5974.1, start by similarity                           |
|  |  |  |  |  |  |  |  |  |  | <a href="#">KLLA0A09713g</a> | similar to splQ03533 Saccharomyces cerevisiae YMR291w, start by similarity                                                                             |
|  |  |  |  |  |  |  |  |  |  | <a href="#">KLLA0E17127g</a> | similar to splP38691 Saccharomyces cerevisiae YHR082c KSP1 ser/thr protein kinase, start by similarity                                                 |
|  |  |  |  |  |  |  |  |  |  | <a href="#">YALI0C04158g</a> | similar to splP18961 Saccharomyces cerevisiae Serine/threonine-protein kinase YPK2/YKR2, hypothetical start                                            |
|  |  |  |  |  |  |  |  |  |  | <a href="#">DEHA0F24676g</a> | similar to splP24719 Saccharomyces cerevisiae YOR351c MEK1 ser/thr protein kinase                                                                      |
|  |  |  |  |  |  |  |  |  |  | <a href="#">DEHA0G14817g</a> | similar to CA2643CaHSL1 Candida albicans CaHSL1, hypothetical start                                                                                    |
|  |  |  |  |  |  |  |  |  |  | <a href="#">DEHA0C18150g</a> | similar to splP40494 Saccharomyces cerevisiae YIL095w PRK1 serine/threonine protein kinase, start by similarity                                        |
|  |  |  |  |  |  |  |  |  |  | <a href="#">CAGL0K10604g</a> | similar to splP27466 Saccharomyces cerevisiae YFR014c CMK1 Ca <sup>2+</sup> /calmodulin-dependent ser/thr protein kinase type I, hypothetical start    |
|  |  |  |  |  |  |  |  |  |  | <a href="#">DEHA0C08591g</a> | similar to splP22204 Saccharomyces cerevisiae YGR092w DBF2, hypothetical start, sequence gap                                                           |
|  |  |  |  |  |  |  |  |  |  | <a href="#">YALI0F13629g</a> | some similarities with splP2356 Saccharomyces cerevisiae YLR36 STE11 ser/thr protein kinase of the MEKK family, hypothetical start                     |
|  |  |  |  |  |  |  |  |  |  | <a href="#">KLLA0C06138g</a> | similar to splP32562 Saccharomyces cerevisiae YMR001c CDC5 involved in regulation of DNA replication, start by similarity                              |
|  |  |  |  |  |  |  |  |  |  | <a href="#">YALI0F16159g</a> | some similarities with wilNCU009 Neurospora crassa NCU00914. hypothetical protein, hypothetical start                                                  |
|  |  |  |  |  |  |  |  |  |  |                              | similar to splP34244 Saccharomyces cerevisiae YOL100w PKH2, hypothetical start                                                                         |

|                              |                                                                                                                                                                                                                              |
|------------------------------|------------------------------------------------------------------------------------------------------------------------------------------------------------------------------------------------------------------------------|
| <a href="#">CAGL0K08514g</a> | cerevisiae YKL101w serine/threonine protein kinase, hypothetical start                                                                                                                                                       |
| <a href="#">DEHA0F25278g</a> | similar to calCA1881CaRCK2 Candida albicans CaRCK2 Ca/calmodulin dependent ser/thr protein kinase (by homology), hypothetical start                                                                                          |
| <a href="#">KLLA0F26983g</a> | some similarities with splP3280 Saccharomyces cerevisiae YKL041-ELM1 ser/thr-specific protein kinase, hypothetical start                                                                                                     |
| <a href="#">DEHA0C11484g</a> | similar to splP22211 Saccharomyces cerevisiae YNL183c NPR1 or trlQ111 Saccharomyces cerevisiae YDL021, hypothetical start                                                                                                    |
| <a href="#">YALI0C00891g</a> | similar to splO14019 Schizosaccharomyces pombe Proboscidea serine/threonine-protein kinase C29A4.16 (EC 2.7.1.-), hypothetical start                                                                                         |
| <a href="#">KLLA0F23507g</a> | similar to splP24719 Saccharomyces cerevisiae YOR351c MEK1 ser/thr protein kinase, start by similarity                                                                                                                       |
| <a href="#">CAGL0F03245g</a> | similar to splP32361 Saccharomyces cerevisiae YHR079c IRE1, hypothetical start                                                                                                                                               |
| <a href="#">CAGL0K11990g</a> | some similarities with splP3808 Saccharomyces cerevisiae YBR05-1 AKL1 Ark-family Kinase-Like protein, hypothetical start                                                                                                     |
| <a href="#">DEHA0G10417g</a> | similar to CA19711CaPKH2 Candida albicans CaPKH2 Ser/Thr protein kinase (by homology), hypothetical start                                                                                                                    |
| <a href="#">YALI0B17556g</a> | weakly similar to trlQ9Y898 Emergomyces nidulans Calcium/calmodulin dependent protein kinase C, hypothetical start                                                                                                           |
| <a href="#">CAGL0G03047g</a> | highly similar to splP22204 Saccharomyces cerevisiae YGR09-1 DBF2 ser/thrprotein kinase or splP32204 Saccharomyces cerevisiae YPR111w DBF20, hypothetical start                                                              |
| <a href="#">YALI0F27093g</a> | weakly similar to DEHA-IPF372 Debaryomyces hansenii, hypothetical start                                                                                                                                                      |
| <a href="#">DEHA0C14091g</a> | similar to splP37292 Saccharomyces cerevisiae YBR263w SHM1, hypothetical start                                                                                                                                               |
| <a href="#">DEHA0C18601g</a> | similar to CA44331CaBCK1 Candida albicans, hypothetical start                                                                                                                                                                |
| <a href="#">KLLA0C04213g</a> | similar to splP22209 Saccharomyces cerevisiae YAR018c KIN3 ser/thr protein kinase, hypothetical start                                                                                                                        |
| <a href="#">YALI0A04697g</a> | similar to splO42626 Neurospora crassa Serine/threonine-protein kinase nr001 (Nonrepressible conidiation protein), hypothetical start                                                                                        |
| <a href="#">YALI0D26015g</a> | similar to splP32562 Saccharomyces cerevisiae Cell cycle protein kinase CDC5/MSD2 (EC 2.7.1.-), hypothetical start                                                                                                           |
| <a href="#">DEHA0G14839g</a> | highly similar to sCA3870CaYP1 Candida albicans CaYPK1, start by similarity                                                                                                                                                  |
| <a href="#">KLLA0C14278g</a> | similar to splP28708 Saccharomyces cerevisiae YKL116c, hypothetical start                                                                                                                                                    |
| <a href="#">YALI0E13750g</a> | similar to trlCAD79666 Neurospora crassa BID14.230 Related to serine/threonine-protein kinase a DEHA-IPF6149.1 Debaryomyces hansenii, no start                                                                               |
| <a href="#">CAGL0B04147g</a> | highly similar to splP22204 Saccharomyces cerevisiae YGR09-1 DBF2 ser/thrprotein kinase related to DBF20P or splP32328 Saccharomyces cerevisiae YPR111w DBF20 cell cycle protein kinase related to DBF20, hypothetical start |

|                              |                                                                                                                                                                         |
|------------------------------|-------------------------------------------------------------------------------------------------------------------------------------------------------------------------|
| <a href="#">DEHA0F13497g</a> | similar to calCA1299iCaPTK2 Candida albicans CaPTK2 serine /threonine protein kinase involved in polyamine uptake (by homology), hypothetical start                     |
| <a href="#">DEHA0D13684g</a> | similar to CA4865iIPF4085 Candida albicans IPF4085, start by similarity                                                                                                 |
| <a href="#">CAGL0L06006g</a> | similar to splP53104 Saccharomyces cerevisiae YGL180w APG1 essential for autophagocytosis, hypothetical start                                                           |
| <a href="#">CAGL0E05720g</a> | similar to splP38991 Saccharomyces cerevisiae YPL209c IPL1 ser/thr protein kinase, start by similarity                                                                  |
| <a href="#">KLLA0F18612g</a> | some similarities with splP3808 Saccharomyces cerevisiae YBR05c AKL1 Ark-family Kinase-Like protein, hypothetical start                                                 |
| <a href="#">YAL10E24563g</a> | similar to trlQ12152 Saccharomyces cerevisiae YPL150w, hypothetical start                                                                                               |
| <a href="#">DEHA0F24013g</a> | similar to calCA5226iCaRIM15 Candida albicans CaRIM15 Protein kinase involved in the RIM pathway (by homology), hypothetical start                                      |
| <a href="#">CAGL0I04422g</a> | some similarities with splP2220 Saccharomyces cerevisiae YAR05c KIN3 ser/thr protein kinase, hypothetical start                                                         |
| <a href="#">CAGL0K01661g</a> | some similarities with trlQ1210 Saccharomyces cerevisiae YDL021c, hypothetical start                                                                                    |
| <a href="#">DEHA0E15741g</a> | highly similar to CA3361iCaSNF1 Candida albicans CaSNF1 serine/threonine protein kinase, hypothetical start                                                             |
| <a href="#">CAGL0M02233g</a> | highly similar to splP22216 Saccharomyces cerevisiae YPL150c SPK1 ser/thr/tyr protein kinase, hypothetical start                                                        |
| <a href="#">CAGL0F04741g</a> | similar to splP22517 Saccharomyces cerevisiae YOL016c CMK2 Ca2+/calmodulin-dependent ser/thr protein kinase, type II, hypothetical start                                |
| <a href="#">YAL10E06523g</a> | weakly similar to splP34244 Saccharomyces cerevisiae YKL101c HSL1 ser/thr protein kinase, coupled to septin ring assembly to cell cycle progression, hypothetical start |
| <a href="#">KLLA0E11979g</a> | some similarities with splP25333 Saccharomyces cerevisiae YCR008w SAT4 serine/threonine-specific protein kinase, hypothetical start                                     |
| <a href="#">CAGL0J11308g</a> | similar to splP22211 Saccharomyces cerevisiae YNL183c NPR1 ser/thr protein kinase, hypothetical start                                                                   |
| <a href="#">DEHA0G11638g</a> | similar to splP25333 Saccharomyces cerevisiae YCR008w SAT4 serine/threonine-specific protein kinase, hypothetical start                                                 |
| <a href="#">CAGL0H10208g</a> | similar to splP38080 Saccharomyces cerevisiae YBR059c AKL1 Ark-family Kinase-Like protein, hypothetical start                                                           |
| <a href="#">CAGL0B02739g</a> | similar to splP23561 Saccharomyces cerevisiae YLR362w STE11 ser/thr protein kinase of the MEKK family, hypothetical start                                               |
| <a href="#">YAL10D07150g</a> | weakly similar to trlQ9C2E8 Neurospora crassa Conserved hypothetical protein, start by similarity                                                                       |
| <a href="#">DEHA0F10197g</a> | highly similar to calCA2265iCaCMK2 Candida albicans CaCMK2 Ca2+/calmodulin-dependent ser/thr protein kinase, type II (by homology), hypothetical start                  |
| <a href="#">DEHA0B12628g</a> | similar to splP06245 Saccharomyces cerevisiae YPL203w TPK2 cAMP-dependent protein kinase, hypothetical start                                                            |

|                              |                                                                                                                                                                                                                     |
|------------------------------|---------------------------------------------------------------------------------------------------------------------------------------------------------------------------------------------------------------------|
| <a href="#">DEHA0B12028g</a> | dependent protein kinase 2, catalytic chain, start by similarity                                                                                                                                                    |
| <a href="#">DEHA0E13574g</a> | similar to CA2193 IPF14273 <i>Candida albicans</i> IPF14273 Probable serine/threonine protein kinase                                                                                                                |
| <a href="#">KLLA0D07348g</a> | weakly similar to sgd S000606: <i>Saccharomyces cerevisiae</i> YPL142c start by similarity                                                                                                                          |
| <a href="#">DEHA0B12650g</a> | some similarities with splP3897 <i>Saccharomyces cerevisiae</i> YJL164c HAL5 ser/thr protein kinase, hypothetical start                                                                                             |
| <a href="#">DEHA0F04114g</a> | similar to CA0576 CaNPR1 <i>Candida albicans</i> CaNPR1, hypothetical start                                                                                                                                         |
| <a href="#">DEHA0C13211g</a> | similar to splP22216 <i>Saccharomyces cerevisiae</i> YPL153c SPK1, hypothetical start                                                                                                                               |
| <a href="#">KLLA0B07205g</a> | some similarities with splP0598 <i>Saccharomyces cerevisiae</i> YKL163c TPK3 cAMP-dependent protein kinase catalytic chain, hypothetical start                                                                      |
| <a href="#">CAGL0K06479g</a> | some similarities with tr Q0330: <i>Saccharomyces cerevisiae</i> YDR462c start by similarity                                                                                                                        |
| <a href="#">KLLA0C12485g</a> | weakly similar to splQ12236 <i>Saccharomyces cerevisiae</i> YOL100c PKH2, start by similarity                                                                                                                       |
| <a href="#">KLLA0E06413g</a> | gil22858696 gb AAN05732.1 <i>Kluyveromyces lactis</i> protein kinase start by similarity                                                                                                                            |
| <a href="#">YALI0D26213g</a> | weakly similar to tr Q96WJ8 <i>Blumifera graminis</i> Protein kinase C-like protein, hypothetical start                                                                                                             |
| <a href="#">DEHA0G14707g</a> | similar to CA6135 CaCMK1 <i>Candida albicans</i> CaCMK1, hypothetical start                                                                                                                                         |
| <a href="#">DEHA0E16115g</a> | similar to CA5074 IPF3607 <i>Candida albicans</i> IPF3607 putative serine/threonine protein kinase, hypothetical start                                                                                              |
| <a href="#">CAGL0M13167g</a> | similar to splP32801 <i>Saccharomyces cerevisiae</i> YKL048c ELM1 ser/thr specific protein kinase, hypothetical start                                                                                               |
| <a href="#">KLLA0F01408g</a> | weakly similar to sgd S000218: <i>Saccharomyces cerevisiae</i> YDL022c hypothetical start                                                                                                                           |
| <a href="#">DEHA0F25212g</a> | highly similar to tr Q9HEW0 <i>Candida albicans</i> cAMP-dependent protein kinase catalytic subunit, hypothetical start                                                                                             |
| <a href="#">CAGL0M08404g</a> | some similarities with splP0598 <i>Saccharomyces cerevisiae</i> YKL163c TPK3 or splP06244 <i>Saccharomyces cerevisiae</i> YJL164c SRA3 or splP0598 <i>Saccharomyces cerevisiae</i> YPL202c TPK2, hypothetical start |
| <a href="#">KLLA0A03806g</a> | gil2181934 embl CAA61235.1 <i>Kluyveromyces lactis</i> putative kinase start by similarity                                                                                                                          |
| <a href="#">YALI0D19470g</a> | similar to tr Q871H9 <i>Neurospora crassa</i> B16M17.090 Related to Ste20-like protein kinase Don3, hypothetical start                                                                                              |
| <a href="#">YALI0A10230g</a> | similar to splP22211 <i>Saccharomyces cerevisiae</i> YNL183c NPR1 ser/thr protein kinase, start by similarity                                                                                                       |
| <a href="#">DEHA0F10461g</a> | some similarities with calCA1288 CaKSP1 <i>Candida albicans</i> CaKSP1 SERINE/THREONINE PROTEIN KINASE by homology, hypothetical start                                                                              |
| <a href="#">YALI0F01716g</a> | tr Q9P860 <i>Yarrowia lipolytica</i> Wee1 protein, mitosis inhibitor protein kinase, hypothetical start                                                                                                             |
| <a href="#">YALI0E27632g</a> | tr O93955 <i>Yarrowia lipolytica</i> SSF1 protein, multicopy suppressor of Ssr1 secretory defects, putative calmodulin                                                                                              |

|                                |                         |                                                                                                       |                                                                  |    |    |    |    |    |       |                      |                       |  |  |  |  |  |  |  |                                                                                                                                                 |
|--------------------------------|-------------------------|-------------------------------------------------------------------------------------------------------|------------------------------------------------------------------|----|----|----|----|----|-------|----------------------|-----------------------|--|--|--|--|--|--|--|-------------------------------------------------------------------------------------------------------------------------------------------------|
|                                |                         |                                                                                                       |                                                                  |    |    |    |    |    |       |                      |                       |  |  |  |  |  |  |  | dependent ser/thr protein kinase identified start                                                                                               |
|                                |                         |                                                                                                       |                                                                  |    |    |    |    |    |       |                      |                       |  |  |  |  |  |  |  | similar to splP38147 Saccharomyces cerevisiae YBR274w CHK1 regul inhibitory Cdk phosphorylation of P start by similarity                        |
|                                |                         |                                                                                                       |                                                                  |    |    |    |    |    |       |                      |                       |  |  |  |  |  |  |  | similar to splP11792 Saccharomyces cerevisiae YHR205w SCH9 serine/threonine protein kinase, sta similarity                                      |
|                                |                         |                                                                                                       |                                                                  |    |    |    |    |    |       |                      |                       |  |  |  |  |  |  |  | similar to CA2348IPF12811 Can albicans, putative serine/threonin kinase, hypothetical start                                                     |
|                                |                         |                                                                                                       |                                                                  |    |    |    |    |    |       |                      |                       |  |  |  |  |  |  |  | similar to trlQ12003 Saccharomyces cerevisiae YPL236c, hypothetical                                                                             |
|                                |                         |                                                                                                       |                                                                  |    |    |    |    |    |       |                      |                       |  |  |  |  |  |  |  | similar to splP54199 Saccharomyces cerevisiae YDL028c MPS1 serine/threonine/tyrosine protein ki hypothetical start                              |
|                                |                         |                                                                                                       |                                                                  |    |    |    |    |    |       |                      |                       |  |  |  |  |  |  |  | gil3021329 emblCAA06336.1 Kluveromyces lactis MAP kinase k kinase, start by similarity                                                          |
|                                |                         |                                                                                                       |                                                                  |    |    |    |    |    |       |                      |                       |  |  |  |  |  |  |  | some similarities with splQ0349 Saccharomyces cerevisiae YHL0 ser/thr protein kinase of the pherom pathway, hypothetical start                  |
|                                |                         |                                                                                                       |                                                                  |    |    |    |    |    |       |                      |                       |  |  |  |  |  |  |  | similar to splP38070 Saccharomyces cerevisiae YBR028c, start by simil                                                                           |
|                                |                         |                                                                                                       |                                                                  |    |    |    |    |    |       |                      |                       |  |  |  |  |  |  |  | similar to splP12688 Saccharomyces cerevisiae YKL126w or splP189 Saccharomyces cerevisiae YMR1 ser/thr-specific protein kinases, sta similarity |
|                                |                         |                                                                                                       |                                                                  |    |    |    |    |    |       |                      |                       |  |  |  |  |  |  |  | highly similar to splP06245 Saccharomyces cerevisiae YPL20 TPK2 cAMP-dependent protein kin catalytic chain, start by similarit                  |
|                                |                         |                                                                                                       |                                                                  |    |    |    |    |    |       |                      |                       |  |  |  |  |  |  |  | similar to CA5851 CaKIN2 Can albicans CaKIN2, hypothetical st                                                                                   |
|                                |                         |                                                                                                       |                                                                  |    |    |    |    |    |       |                      |                       |  |  |  |  |  |  |  | gil28565036 gblAAO32601.1 Kluveromyces lactis DBF2, start similarity                                                                            |
|                                |                         |                                                                                                       |                                                                  |    |    |    |    |    |       |                      |                       |  |  |  |  |  |  |  | gil6967028 emblCAB72435.1 Kluveromyces lactis MUP1 prot hypothetical start                                                                      |
|                                |                         |                                                                                                       |                                                                  |    |    |    |    |    |       |                      |                       |  |  |  |  |  |  |  | similar to splQ03533 Saccharomyces cerevisiae YMR291w, hypothetical                                                                             |
|                                |                         |                                                                                                       |                                                                  |    |    |    |    |    |       |                      |                       |  |  |  |  |  |  |  | similar to sgd S0002874 Saccharomyces cerevisiae YDR466w, start by simil                                                                        |
|                                |                         |                                                                                                       |                                                                  |    |    |    |    |    |       |                      |                       |  |  |  |  |  |  |  | similar to splP22204 Saccharomyces cerevisiae YGR092w DBF2, hypothetical start, sequence gap                                                    |
|                                |                         |                                                                                                       |                                                                  |    |    |    |    |    |       |                      |                       |  |  |  |  |  |  |  | similar to splP40494 Saccharomyces cerevisiae YIL095w PRK1, start similarity                                                                    |
|                                |                         |                                                                                                       |                                                                  |    |    |    |    |    |       |                      |                       |  |  |  |  |  |  |  | similar to trlQ03785 Saccharomyces cerevisiae YDR247w, hypothetical                                                                             |
|                                |                         |                                                                                                       |                                                                  |    |    |    |    |    |       |                      |                       |  |  |  |  |  |  |  | similar to CA0719 IPF9779.5 Can albicans IPF9779.5 serine/threon protein kinase 5-prime end, hypothe start                                      |
|                                |                         |                                                                                                       |                                                                  |    |    |    |    |    |       |                      |                       |  |  |  |  |  |  |  | some similarities with splQ1223 Saccharomyces cerevisiae YOL10 PKH2 related to ser/thr protein kin P108.1.f16.1, hypothetical star              |
|                                |                         |                                                                                                       |                                                                  |    |    |    |    |    |       |                      |                       |  |  |  |  |  |  |  | similar to CA0577 IPF16051 Can albicans IPF16051 unknown funct start by similarity                                                              |
|                                |                         |                                                                                                       |                                                                  |    |    |    |    |    |       |                      |                       |  |  |  |  |  |  |  | similar to splP53104 Saccharomyces cerevisiae YGL180w APG1 essenti autophagocytosis, start by similar                                           |
|                                |                         |                                                                                                       |                                                                  |    |    |    |    |    |       |                      |                       |  |  |  |  |  |  |  | some similarities with splP5323 Saccharomyces cerevisiae YGR05 hypothetical start                                                               |
| <a href="#">SNF1 (YDR477W)</a> | <a href="#">2.7.1.-</a> | splP06782 Saccharomyces cerevisiae YDR477w SNF1 carbon catabolite derepressing ser/thr protein kinase | exhibits growth defect on a non-fermentable (respiratory) carbon | NA | NA | NA | NA | NA | sckdy | 57 58<br>49 54<br>42 | <a href="#">GLC.2</a> |  |  |  |  |  |  |  |                                                                                                                                                 |

P108.1.f9.1

source

|                              | hypothetical start                                                                                                                                                                 |
|------------------------------|------------------------------------------------------------------------------------------------------------------------------------------------------------------------------------|
| <a href="#">YALI0C21758g</a> | similar to KLLA-IPF4914.1 Kluyveromyces lactis IPF 4914, hypothetical start                                                                                                        |
| <a href="#">CAGL0C03509g</a> | similar to splP53739 Saccharomyces cerevisiae YNR047w or splP2533 Saccharomyces cerevisiae YCR09KIN82, hypothetical start                                                          |
| <a href="#">KLLA0B03586g</a> | similar to splP11792 Saccharomyces cerevisiae YHR205w SCH9 serine/threonine protein kinase involved in stress response and nutrient-sensing signaling pathway, start by similarity |
| <a href="#">YALI0C15444g</a> | similar to trlQ12706 Schizosaccharomyces pombe Prob serine/threonine protein kinase PS (EC 2.7.1.-), hypothetical start                                                            |
| <a href="#">YALI0E34067g</a> | weakly similar to DEHA-IPF394 Debaryomyces hansenii IPF 394, hypothetical start                                                                                                    |
| <a href="#">CAGL0C05005g</a> | similar to splP27636 Saccharomyces cerevisiae YAR019c CDC15, hypothetical start                                                                                                    |
| <a href="#">DEHA0B04895g</a> | similar to CA2018 CaSTE11 Candida albicans CaSTE11 ser/thr protein kinase of the MEKK family, hypothetical start                                                                   |
| <a href="#">KLLA0B12716g</a> | similar to splP12688 Saccharomyces cerevisiae YKL126w YPK1 ser/thr specific protein kinase, start by similarity                                                                    |
| <a href="#">CAGL0F03707g</a> | similar to splQ08732 Saccharomyces cerevisiae YOR267c, start by similarity                                                                                                         |
| <a href="#">YALI0E22858g</a> | Weakly similar to CAAL-CA55 CaAKL1 serine/threonine protein kinase (by homology), Hypothetical start                                                                               |
| <a href="#">KLLA0F09031g</a> | similar to splP43565 Saccharomyces cerevisiae YFL033c RIM15 protein kinase involved in expression of meiotic genes, hypothetical start                                             |
| <a href="#">DEHA0E12782g</a> | similar to splP38070 Saccharomyces cerevisiae YBR028c, putative ribosomal protein kinase                                                                                           |
| <a href="#">CAGL0B01925g</a> | similar to splP13185 Saccharomyces cerevisiae YDR122w KIN1 or splP13186 Saccharomyces cerevisiae YLR09KIN2, hypothetical start                                                     |
| <a href="#">KLLA0C07535g</a> | some similarities with sgd S00057 Saccharomyces cerevisiae YOR267c, hypothetical start                                                                                             |
| <a href="#">CAGL0D02244g</a> | similar to splP24719 Saccharomyces cerevisiae YOR351c MEK1 ser/thr protein kinase, hypothetical start                                                                              |
| <a href="#">DEHA0C13387g</a> | similar to trlQ08732 Saccharomyces cerevisiae YOR267C, hypothetical start                                                                                                          |
| <a href="#">YALI0E17743g</a> | no similarity, hypothetical start                                                                                                                                                  |
| <a href="#">CAGL0C02893g</a> | similar to trlQ08732 Saccharomyces cerevisiae YOR267c, hypothetical start                                                                                                          |
| <a href="#">KLLA0F19536g</a> | similar to splP13186 Saccharomyces cerevisiae YLR096w KIN2 ser/thr protein kinase, start by similarity                                                                             |
| <a href="#">CAGL0M11396g</a> | similar to splP13186 Saccharomyces cerevisiae YLR096w KIN2 ser/thr protein kinase, hypothetical start                                                                              |
| <a href="#">YALI0B13178g</a> | similar to splP32490 Saccharomyces cerevisiae YOR231w MKK1 ser/thr protein kinase, start by similarity                                                                             |
| <a href="#">DEHA0F27489g</a> | similar to CA1288 CaKSP1 Candida albicans CaKSP1 serine/threonine protein kinase (by homology), start by similarity                                                                |
| <a href="#">KLLA0B02332g</a> | similar to splP38991 Saccharomyces cerevisiae YPL209c IPL1 ser/thr protein kinase, start by similarity                                                                             |
| <a href="#">CAGL0L07326g</a> | similar to splP39009 Saccharomyces cerevisiae YDL101c DUN1 protein kinase, start by similarity                                                                                     |

|                              |                                                                                                                                                                                              |
|------------------------------|----------------------------------------------------------------------------------------------------------------------------------------------------------------------------------------------|
|                              | kinase, start by similarity                                                                                                                                                                  |
| <a href="#">KLLA0F11143g</a> | similar to splP22216 Saccharomyces cerevisiae YPL153c SPK1 ser/thr protein kinase, start by similarity                                                                                       |
| <a href="#">DEHA0E14641g</a> | similar to CA40971CaGIN4 Candida albicans CaGIN4 ser/thr protein kinase (by homology), hypothetical start                                                                                    |
| <a href="#">CAGL0J03872g</a> | similar to splQ01919 Saccharomyces cerevisiae YOR233w KIN4 ser/thr protein kinase or trlQ03002 Saccharomyces cerevisiae YPL14 start by similarity                                            |
| <a href="#">YALJ0D14542g</a> | similar to splP11792 Saccharomyces cerevisiae YHR205w SCH9 serine/threonine protein kinase involved in stress response and nutrient-sensing signaling pathway, start by similarity           |
| <a href="#">KLLA0B06501g</a> | some similarities with splP4711 Saccharomyces cerevisiae YJR05 PTK2 involved in polyamine uptake, hypothetical start                                                                         |
| <a href="#">DEHA0C05742g</a> | some similarities with splP4189 Schizosaccharomyces pombe Cdc28 division control protein 7 and CA26691IPF17494.3eoc Candida albicans and CA24041CaCDC15 Candida albicans, hypothetical start |
| <a href="#">DEHA0E20878g</a> | similar to CA00441IPF17347 Candida albicans IPF17347, hypothetical start                                                                                                                     |
| <a href="#">KLLA0E08371g</a> | similar to splP40494 Saccharomyces cerevisiae YIL095w PRK1 serine/threonine protein kinase involved in regulation of actin cytoskeleton organization, start by similarity                    |
| <a href="#">KLLA0F13552g</a> | gi133386566lemb CAD87727.1 Kluyveromyces lactis protein kinase, start by similarity                                                                                                          |
| <a href="#">CAGL0J11638g</a> | highly similar to splP32562 Saccharomyces cerevisiae YMR0 CDC5 involved in regulation of DNA replication, hypothetical start                                                                 |
| <a href="#">CAGL0K02167g</a> | similar to splP38990 Saccharomyces cerevisiae YER129w Serine/threonine protein kinase, start by similarity                                                                                   |
| <a href="#">DEHA0F09493g</a> | similar to calCA29091IPF11424 Candida albicans IPF11424 unknown function, hypothetical start                                                                                                 |
| <a href="#">CAGL0G05720g</a> | similar to splP22211 Saccharomyces cerevisiae YNL183c NPR1 ser/thr protein kinase, start by similarity                                                                                       |
| <a href="#">DEHA0C09823g</a> | similar to CA12051CaSSK2 Candida albicans, hypothetical start                                                                                                                                |
| <a href="#">YALJ0D22770g</a> | Similar to CAAL-CA5851 Candida albicans ser/thr protein kinase (by homology), start                                                                                                          |
| <a href="#">CAGL0M08910g</a> | highly similar to splQ00372 Saccharomyces cerevisiae YDR47 carbon catabolite derepressing serine/threonine protein kinase, hypothetical start                                                |
| <a href="#">KLLA0C04191g</a> | weakly similar to splP27636 Saccharomyces cerevisiae YAR0 CDC15 protein kinase of the MAP kinase kinase kinase family, hypothetical start                                                    |
| <a href="#">DEHA0B16071g</a> | similar to splP22209 Saccharomyces cerevisiae YAR018c KIN3 ser/thr protein kinase, start by similarity                                                                                       |
| <a href="#">CAGL0K03399g</a> | highly similar to splP12688 Saccharomyces cerevisiae YKL12 Serine/threonine-protein kinase, start by similarity                                                                              |
| <a href="#">CAGL0J04972g</a> | some similarities with trlQ1210 Saccharomyces cerevisiae YDL02 hypothetical start                                                                                                            |



|                              |                                                                                                                                                                                                               |
|------------------------------|---------------------------------------------------------------------------------------------------------------------------------------------------------------------------------------------------------------|
| <a href="#">DEHA0F10923g</a> | highly similar to calCA2986 CaCD<br>Candida albicans CaCDC5 Cell-c<br>protein kinase (by homology), star<br>similarity                                                                                        |
| <a href="#">YALI0B04840g</a> | similar to trlQ12003 Saccharomy<br>cerevisiae YPL236c, start by simil                                                                                                                                         |
| <a href="#">KLLA0C01650g</a> | similar to splQ12263 Saccharomy<br>cerevisiae YDR507c GIN4 ser/thr p<br>kinase, start by similarity                                                                                                           |
| <a href="#">YALI0F08165g</a> | some similarities with splP4189<br>Schizosaccharomyces pombe 7 CD<br>OR SPBC21.06C gene Cell divis<br>control protein, start by similarit                                                                     |
| <a href="#">KLLA0E01584g</a> | highly similar to splP39009<br>Saccharomyces cerevisiae YDL10<br>DUN1 protein kinase, start by simil                                                                                                          |
| <a href="#">DEHA0C02882g</a> | similar to CA4039 CaSKS1 Cand<br>albicans, start by similarity                                                                                                                                                |
| <a href="#">KLLA0F01276g</a> | similar to splP38147 Saccharomy<br>cerevisiae YBR274w CHK1 regul<br>inhibitory Cdk phosphorylation of F<br>start by similarity                                                                                |
| <a href="#">CAGL0G09020g</a> | highly similar to splP06245<br>Saccharomyces cerevisiae YPL20<br>TPK2 cAMP-dependent protein kin<br>catalytic chain, hypothetical star                                                                        |
| <a href="#">DEHA0G16302g</a> | similar to trlQ12706<br>Schizosaccharomyces pombe Prob<br>serine/threonine protein kinase PS<br>start by similarity                                                                                           |
| <a href="#">CAGL0I06248g</a> | similar to splP38970 Saccharomy<br>cerevisiae YJL165c HAL5 ser/thr p<br>kinase, start by similarity                                                                                                           |
| <a href="#">YALI0B08558g</a> | weakly similar to trlQ00863 Nect<br>haematococca Ran1-like protein ki<br>hypothetical start                                                                                                                   |
| <a href="#">DEHA0G05544g</a> | similar to CA1375 IPF7158 Cand<br>albicans IPF7158 putative<br>serine/threonine kinase, hypotetica                                                                                                            |
| <a href="#">KLLA0B13607g</a> | weakly similar to splQ03497<br>Saccharomyces cerevisiae YHL0<br>STE20 ser/thr protein kinase of t<br>pheromone pathway, hypothetical                                                                          |
| <a href="#">YALI0F27159g</a> | some similarities with splP4704<br>Saccharomyces cerevisiae YJL057c<br>probable serine/threonine-protein ki<br>hypothetical start                                                                             |
| <a href="#">CAGL0I05390g</a> | similar to splQ12505 Saccharomy<br>cerevisiae YPL026c SKS1 suppre<br>kinase of SNF3 or trlQ03785<br>Saccharomyces cerevisiae YDR24<br>start by similarity                                                     |
| <a href="#">YALI0E31361g</a> | similar to trlQ9HF33 Arthrobo<br>dactyloides Calmodulin-binding pr<br>kinase, hypothetical start                                                                                                              |
| <a href="#">YALI0B14201g</a> | similar to splP32328 Saccharomy<br>cerevisiae YPR111w DBF20 cell c<br>protein kinase P108.1.f3.6 or splP2<br>Saccharomyces cerevisiae YGR09<br>DBF2 ser/thr protein kinase<br>P108.1.f16.1, hypothetical star |
| <a href="#">DEHA0C16181g</a> | similar to CA1447 CaNRK1 Cand<br>albicans, hypothetical start                                                                                                                                                 |
| <a href="#">CAGL0K04301g</a> | similar to splP53233 Saccharomy<br>cerevisiae YGR052w, hypothetical                                                                                                                                           |
| <a href="#">KLLA0A06820g</a> | some similarities with splP3897<br>Saccharomyces cerevisiae YJL16<br>HAL5 ser/thr protein kinase, hypoth<br>start                                                                                             |
| <a href="#">KLLA0C00979g</a> | similar to splP08458 Saccharomy<br>cerevisiae YDR523c SPS1 ser/thr p<br>kinase, hypothetical start                                                                                                            |
| <a href="#">YALI0D02101g</a> | similar to splO94168 Candida tropi<br>Carbon catabolite derepressing pro                                                                                                                                      |

|                              |                                                                                                                                                           |
|------------------------------|-----------------------------------------------------------------------------------------------------------------------------------------------------------|
|                              | kinase (EC 2.7.1.-), hypothetical s                                                                                                                       |
| <a href="#">YALI0C08305g</a> | highly similar to splP06245<br>Saccharomyces cerevisiae YPL20<br>TPK2 cAMP-dependent protein kin<br>catalytic chain, hypothetical star                    |
| <a href="#">KLLA0D12100g</a> | some similarities with sgdI50002<br>Saccharomyces cerevisiae YDR24<br>hypothetical start                                                                  |
| <a href="#">CAGL0M10791g</a> | highly similar to splP53599<br>Saccharomyces cerevisiae YNR0<br>SSK2 MAP kinase, no start, frame                                                          |
| <a href="#">YALI0A05247g</a> | similar to trlQ876Z5 Neurospora cr<br>OS-4 Putative SSK22 like MAPK<br>kinase, hypothetical start                                                         |
| <a href="#">DEHA0F24684g</a> | similar to splP24719 Saccharomy<br>cerevisiae YOR351c MEK1 ser/t<br>protein kinase                                                                        |
| <a href="#">KLLA0B13112g</a> | similar to splP23561 Saccharomy<br>cerevisiae YLR362w STE11 ser/<br>protein kinase of the MEKK family<br>by similarity                                    |
| <a href="#">CAGL0F03311g</a> | similar to splP38691 Saccharomy<br>cerevisiae YHR082c KSP1 ser/t<br>protein kinase, start by similarit                                                    |
| <a href="#">KLLA0C03938g</a> | some similarities with sgdI50002<br>Saccharomyces cerevisiae YDL02<br>hypothetical start                                                                  |
| <a href="#">CAGL0M08360g</a> | some similarities with splP3897<br>Saccharomyces cerevisiae YJL16<br>ser/thr protein kinase, hypothetical                                                 |
| <a href="#">YALI0E34375g</a> | similar to wilNCU00108.1 Neurosp<br>crassa NCU00108.1 hypothetical pr<br>(93222 - 91750), hypothetical sta                                                |
| <a href="#">KLLA0B07579g</a> | weakly similar to splP32944<br>Saccharomyces cerevisiae YJL18<br>SWE1 ser/tyr dual-specificity prote<br>kinase, start by similarity                       |
| <a href="#">YALI0D25388g</a> | similar to trlQ8TFN2 Pichia angu<br>Serine-threonine kinase Pdd7p<br>hypothetical start                                                                   |
| <a href="#">DEHA0C04840g</a> | some similarities with splP3899<br>Saccharomyces cerevisiae YPL20<br>IPL1 ser/thr protein kinase, hypothe<br>start                                        |
| <a href="#">YALI0B00880g</a> | similar to splP22211 Saccharomy<br>cerevisiae YNL183c NPR1 ser/t<br>protein kinase, hypothetical start                                                    |
| <a href="#">YALI0D08822g</a> | some similarities with splP3899<br>Saccharomyces cerevisiae YER12<br>PAK1 DNA polymerase alpha<br>suppressing protein kinase, hypothe<br>start            |
| <a href="#">DEHA0G22440g</a> | similar to CA4770IPF9382.3 Can<br>albicans IPF9382.3, hypothetical s                                                                                      |
| <a href="#">KLLA0C08525g</a> | similar to splP53599 Saccharomy<br>cerevisiae YNR031c SSK2 MAP k<br>kinase kinase of the high osmolar<br>signal transduction pathway, start<br>similarity |
| <a href="#">YALI0F09746g</a> | similar to splP24583 Saccharomy<br>cerevisiae YBL105c PKC1 ser/t<br>protein kinase, start by similarit                                                    |
| <a href="#">DEHA0D07601g</a> | similar to Candida albicans CA42<br>start by similarity                                                                                                   |
| <a href="#">CAGL0I07513g</a> | similar to splQ12236 Saccharomy<br>cerevisiae YOL100w PKH2, start<br>similarity                                                                           |
| <a href="#">DEHA0D11242g</a> | highly similar to CA5299IPF219<br>Candida albicans IPF2190, start<br>similarity                                                                           |
| <a href="#">DEHA0F26994g</a> | similar to CA0206IPF14089 Can<br>albicans IPF14089 putative<br>serine/threonine protein kinase<br>hypothetical start                                      |

|                                |                        |                                                                                    |        |    |    |    |    |    |       |              |                        |                              |                                                                                                                                                     |
|--------------------------------|------------------------|------------------------------------------------------------------------------------|--------|----|----|----|----|----|-------|--------------|------------------------|------------------------------|-----------------------------------------------------------------------------------------------------------------------------------------------------|
|                                |                        |                                                                                    |        |    |    |    |    |    |       |              |                        | <a href="#">CAGL0M09361g</a> | highly similar to splP24583 Saccharomyces cerevisiae YBL10 PKC1 ser/thr protein kinase, start similarity                                            |
|                                |                        |                                                                                    |        |    |    |    |    |    |       |              |                        | <a href="#">YALI0E06501g</a> | similar to splP12688 Saccharomyces cerevisiae YKL126w YPK1 ser/thr specific protein kinase, hypothetical start                                      |
|                                |                        |                                                                                    |        |    |    |    |    |    |       |              |                        | <a href="#">CAGL0K05709g</a> | similar to splQ12263 Saccharomyces cerevisiae YDR507c GIN4, start similarity                                                                        |
|                                |                        |                                                                                    |        |    |    |    |    |    |       |              |                        | <a href="#">DEHA0C09130g</a> | similar to splP38147 Saccharomyces cerevisiae YBR274w CHK1, hypothetical start                                                                      |
|                                |                        |                                                                                    |        |    |    |    |    |    |       |              |                        | <a href="#">CAGL0M02299g</a> | similar to trlQ12152 Saccharomyces cerevisiae YPL150w, start by similarity                                                                          |
|                                |                        |                                                                                    |        |    |    |    |    |    |       |              |                        | <a href="#">CAGL0B04301g</a> | similar to splP38070 Saccharomyces cerevisiae YBR028c, start by similarity                                                                          |
|                                |                        |                                                                                    |        |    |    |    |    |    |       |              |                        | <a href="#">CAGL0I03432g</a> | similar to splP53974 Saccharomyces cerevisiae YNL020c ARK1 or splP4 Saccharomyces cerevisiae YIL09 PRK1, start by similarity                        |
|                                |                        |                                                                                    |        |    |    |    |    |    |       |              |                        | <a href="#">DEHA0D13706g</a> | similar to CA4864IPF4087 Candida albicans IPF4087, hypothetical start                                                                               |
|                                |                        |                                                                                    |        |    |    |    |    |    |       |              |                        | <a href="#">KLLA0D09328g</a> | some similarities with splP3899 Saccharomyces cerevisiae YER12 PAK1 DNA polymerase alpha suppressing protein kinase, hypothetical start             |
|                                |                        |                                                                                    |        |    |    |    |    |    |       |              |                        | <a href="#">DEHA0B13519g</a> | some similarities with splP5373 Saccharomyces cerevisiae YNR04 related to ser/thr protein kinases, hypothetical start                               |
|                                |                        |                                                                                    |        |    |    |    |    |    |       |              |                        | <a href="#">CAGL0M02519g</a> | highly similar to trlQ03002 Saccharomyces cerevisiae YPL141 splQ01919 Saccharomyces cerevisiae YOR233w KIN4, hypothetical start                     |
|                                |                        |                                                                                    |        |    |    |    |    |    |       |              |                        | <a href="#">CAGL0G04609g</a> | similar to splQ12236 Saccharomyces cerevisiae YOL100w PKH2, hypothetical start                                                                      |
|                                |                        |                                                                                    |        |    |    |    |    |    |       |              |                        | <a href="#">KLLA0F23155g</a> | similar to splP22517 Saccharomyces cerevisiae YOL016c CMK2 Ca2+/calmodulin-dependent ser/thr protein kinase, type II, start by similarity           |
|                                |                        |                                                                                    |        |    |    |    |    |    |       |              |                        | <a href="#">YALI0F21065g</a> | trlQ9Y7W8 Yarrowia lipolytica ser/thr/tyr MAP kinase kinase, no start                                                                               |
|                                |                        |                                                                                    |        |    |    |    |    |    |       |              |                        | <a href="#">YALI0B15906g</a> | similar to splP08018 Saccharomyces cerevisiae YJL128c PBS2 tyrosine protein kinase of the MAP kinase kinase family P108.1.f2.4, start by similarity |
|                                |                        |                                                                                    |        |    |    |    |    |    |       |              |                        | <a href="#">DEHA0B12672g</a> | similar to splO14427 Candida albicans Serine/threonine-protein kinase CLA4 start by similarity                                                      |
|                                |                        |                                                                                    |        |    |    |    |    |    |       |              |                        | <a href="#">CAGL0M03729g</a> | similar to splP48562 Saccharomyces cerevisiae YNL298w CLA4, start by similarity                                                                     |
|                                |                        |                                                                                    |        |    |    |    |    |    |       |              |                        | <a href="#">KLLA0A07403g</a> | similar to splP48562 Saccharomyces cerevisiae YNL298w CLA4 ser/thr protein kinase, start by similarity                                              |
|                                |                        |                                                                                    |        |    |    |    |    |    |       |              |                        | <a href="#">CAGL0L05632g</a> | similar to splP08018 Saccharomyces cerevisiae YJL128c PBS2, hypothetical start                                                                      |
|                                |                        |                                                                                    |        |    |    |    |    |    |       |              |                        | <a href="#">KLLA0E15378g</a> | some similarities with splP08018 Saccharomyces cerevisiae YJL128c PBS2 tyrosine protein kinase of the MAP kinase kinase family, hypothetical start  |
|                                |                        |                                                                                    |        |    |    |    |    |    |       |              |                        | <a href="#">CAGL0I03498g</a> | similar to splP06784 Saccharomyces cerevisiae YDL159w STE7 ser/thr protein kinase of MAP kinase kinase family, hypothetical start                   |
|                                |                        |                                                                                    |        |    |    |    |    |    |       |              |                        | <a href="#">CAGL0H01639g</a> | similar to splP08458 Saccharomyces cerevisiae YDR523c SPS1 ser/thr protein kinase, hypothetical start                                               |
|                                |                        |                                                                                    |        |    |    |    |    |    |       |              |                        | <a href="#">YALI0D07502g</a> | weakly similar to splP08458 Saccharomyces cerevisiae YDR523c SPS1 ser/thr protein kinase, hypothetical start                                        |
| <a href="#">SPS1 (YDR523C)</a> | <a href="#">2.7.1-</a> | splP08458 Saccharomyces cerevisiae YDR523c SPS1 ser/thr protein kinase P108.1.f6.1 | viable | NA | NA | NA | NA | NA | sckdy | 7 5 4 4<br>3 | <a href="#">GLC.52</a> |                              |                                                                                                                                                     |

|                                |                        |                                                                                      |                                                                                |     |     |     |     |     |       |           |                        |                              |                                                                                                                                                      |
|--------------------------------|------------------------|--------------------------------------------------------------------------------------|--------------------------------------------------------------------------------|-----|-----|-----|-----|-----|-------|-----------|------------------------|------------------------------|------------------------------------------------------------------------------------------------------------------------------------------------------|
|                                |                        |                                                                                      |                                                                                |     |     |     |     |     |       |           |                        | <a href="#">YAL007302g</a>   | SPS1 ser/thr protein kinase, start similarity                                                                                                        |
|                                |                        |                                                                                      |                                                                                |     |     |     |     |     |       |           |                        | <a href="#">DEHA0C17204g</a> | similar to CA4577/CaMKK2 Candida albicans, start by similarity                                                                                       |
|                                |                        |                                                                                      |                                                                                |     |     |     |     |     |       |           |                        | <a href="#">KLLA0C16577g</a> | some similarities with splP0678 Saccharomyces cerevisiae YDL15 STE7 ser/thr/tyr protein kinase of M kinase kinase family, hypothetical               |
|                                |                        |                                                                                      |                                                                                |     |     |     |     |     |       |           |                        | <a href="#">KLLA0D07304g</a> | some similarities with splP3249 Saccharomyces cerevisiae YPL14 MKK2 protein kinase of the map kinase (MEK) family, hypothetical                      |
|                                |                        |                                                                                      |                                                                                |     |     |     |     |     |       |           |                        | <a href="#">CAGL0I03828g</a> | similar to splP32490 Saccharomyces cerevisiae YOR231w MKK1 ser/ protein kinase or splP32491 Saccharomyces cerevisiae YPL14 MKK2, start by similarity |
|                                |                        |                                                                                      |                                                                                |     |     |     |     |     |       |           |                        | <a href="#">DEHA0C09416g</a> | similar to splP08018 Saccharomyces cerevisiae YJL128c PBS2, hypothetical start                                                                       |
|                                |                        |                                                                                      |                                                                                |     |     |     |     |     |       |           |                        | <a href="#">DEHA0F15719g</a> | similar to calCA1623/CaSTE7 Candida albicans CaSTE7 MAP Kinase Kinase hypothetical start                                                             |
| <a href="#">YCK3 (YER123W)</a> | <a href="#">2.7.1-</a> | splP39962 Saccharomyces cerevisiae YER123w YCK3 casein kinase, isoform 3 P108.1.f4.1 | Exhibits sensitivity at 5 generations when grown in synthetic complete medium. | 0.1 | Ess | 0.1 | 0.2 | Ess | sckdy | 4 4 2 2 2 | <a href="#">GLC.92</a> | <a href="#">KLLA0D11044g</a> | gil730472/splP40230/RAG8_KLUYVEROMYCES LACTIS CASEIN KINASE I HOMOLOG RAG8, start by similarity                                                      |
|                                |                        |                                                                                      |                                                                                |     |     |     |     |     |       |           |                        | <a href="#">YALI0E26609g</a> | similar to trlCAD79679 Neurospora crassa, start by similarity                                                                                        |
|                                |                        |                                                                                      |                                                                                |     |     |     |     |     |       |           |                        | <a href="#">DEHA0A09933g</a> | similar to splP23292 Saccharomyces cerevisiae YNL154c YCK2 casein kinase I isoform, hypothetical start                                               |
|                                |                        |                                                                                      |                                                                                |     |     |     |     |     |       |           |                        | <a href="#">CAGL0G06138g</a> | similar to splP23291 Saccharomyces cerevisiae YHR135c YCK1, start by similarity                                                                      |
|                                |                        |                                                                                      |                                                                                |     |     |     |     |     |       |           |                        | <a href="#">DEHA0D04466g</a> | similar to YALI-IPF3384.1 Yarrowia lipolytica, start by similarity                                                                                   |
|                                |                        |                                                                                      |                                                                                |     |     |     |     |     |       |           |                        | <a href="#">YALI0F08305g</a> | similar to splP29295 Saccharomyces cerevisiae YPL204w HRR25 casein kinase I, start by similarity                                                     |
|                                |                        |                                                                                      |                                                                                |     |     |     |     |     |       |           |                        | <a href="#">CAGL0H03553g</a> | highly similar to splP29295 Saccharomyces cerevisiae YPL204w HRR25, start by similarity                                                              |
|                                |                        |                                                                                      |                                                                                |     |     |     |     |     |       |           |                        | <a href="#">CAGL0I05940g</a> | similar to splP23291 Saccharomyces cerevisiae YHR135c YCK1 or splP23292 Saccharomyces cerevisiae YNL154c YCK2, hypothetical start                    |
|                                |                        |                                                                                      |                                                                                |     |     |     |     |     |       |           |                        | <a href="#">CAGL0K02299g</a> | similar to splP39962 Saccharomyces cerevisiae YER123w Casein kinase I isoform, hypothetical start                                                    |
|                                |                        |                                                                                      |                                                                                |     |     |     |     |     |       |           |                        | <a href="#">KLLA0E13563g</a> | some similarities with splP39962 Saccharomyces cerevisiae YER123w YCK3 casein kinase, isoform 3 hypothetical start                                   |
| <a href="#">YCK1 (YHR135C)</a> | <a href="#">2.7.1-</a> | splP23291 Saccharomyces cerevisiae YHR135c YCK1 casein kinase I isoform P108.1.f4.1  | viable                                                                         | Ess | Ess | Ess | Ess | Ess | sckdy | 4 4 2 2 2 | <a href="#">GLC.92</a> | <a href="#">KLLA0D11044g</a> | gil730472/splP40230/RAG8_KLUYVEROMYCES LACTIS CASEIN KINASE I HOMOLOG RAG8, start by similarity                                                      |
|                                |                        |                                                                                      |                                                                                |     |     |     |     |     |       |           |                        | <a href="#">YALI0E26609g</a> | similar to trlCAD79679 Neurospora crassa, start by similarity                                                                                        |
|                                |                        |                                                                                      |                                                                                |     |     |     |     |     |       |           |                        | <a href="#">DEHA0A09933g</a> | similar to splP23292 Saccharomyces cerevisiae YNL154c YCK2 casein kinase I isoform, hypothetical start                                               |
|                                |                        |                                                                                      |                                                                                |     |     |     |     |     |       |           |                        | <a href="#">CAGL0G06138g</a> | similar to splP23291 Saccharomyces cerevisiae YHR135c YCK1, start by similarity                                                                      |
|                                |                        |                                                                                      |                                                                                |     |     |     |     |     |       |           |                        | <a href="#">DEHA0D04466g</a> | similar to YALI-IPF3384.1 Yarrowia lipolytica, start by similarity                                                                                   |
|                                |                        |                                                                                      |                                                                                |     |     |     |     |     |       |           |                        | <a href="#">YALI0F08305g</a> | similar to splP29295 Saccharomyces cerevisiae YPL204w HRR25 casein kinase I, start by similarity                                                     |
|                                |                        |                                                                                      |                                                                                |     |     |     |     |     |       |           |                        | <a href="#">CAGL0H03553g</a> | highly similar to splP29295 Saccharomyces cerevisiae YPL204w HRR25, start by similarity                                                              |
|                                |                        |                                                                                      |                                                                                |     |     |     |     |     |       |           |                        |                              | similar to splP23291 Saccharomyces cerevisiae YHR135c YCK1, start by similarity                                                                      |

|                                    |                        |                                                                                                                                 |        |     |     |     |     |     |       |              |                          |                              |                                                                                                                                                                                                       |
|------------------------------------|------------------------|---------------------------------------------------------------------------------------------------------------------------------|--------|-----|-----|-----|-----|-----|-------|--------------|--------------------------|------------------------------|-------------------------------------------------------------------------------------------------------------------------------------------------------------------------------------------------------|
|                                    |                        |                                                                                                                                 |        |     |     |     |     |     |       |              |                          | <a href="#">CAGL0J05940g</a> | cerevisiae YHR135c YCK1 or splP2<br>Saccharomyces cerevisiae YNL1<br>YCK2, hypothetical start                                                                                                         |
|                                    |                        |                                                                                                                                 |        |     |     |     |     |     |       |              |                          | <a href="#">CAGL0K02299g</a> | similar to splP39962 Saccharomy<br>cerevisiae YER123w Casein kinase<br>hypothetical start                                                                                                             |
|                                    |                        |                                                                                                                                 |        |     |     |     |     |     |       |              |                          | <a href="#">KLLA0E13563g</a> | some similarities with splP3996<br>Saccharomyces cerevisiae YER12<br>YCK3 casein kinase, isoform 3<br>hypothetical start                                                                              |
| <a href="#">CTK2<br/>(YJL006C)</a> | <a href="#">2.7.1-</a> | splP46962<br>Saccharomyces<br>cerevisiae YJL006c<br>CTK2 carboxy-<br>terminal domain<br>(CTD) kinase, beta<br>subunit singleton | viable | 0.8 | 0.4 | 0.5 | 0.1 | Ess | s-k-y | 1 0 1 0<br>1 | <a href="#">GLR.2832</a> | <a href="#">YALI0E13640g</a> | weakly similar to trIO59748<br>Schizosaccharomyces pombe Cyc<br>homolog and splP46962 Saccharom<br>cerevisiae YJL006c CTK2 carboxy<br>terminal domain (CTD) kinase be<br>subunit, start by similarity |
|                                    |                        |                                                                                                                                 |        |     |     |     |     |     |       |              |                          | <a href="#">KLLA0D09482g</a> | similar to splP46962 Saccharomy<br>cerevisiae YJL006c CTK2 carboxy<br>terminal domain (CTD) kinase, b<br>subunit singleton, start by similar                                                          |
|                                    |                        |                                                                                                                                 |        |     |     |     |     |     |       |              |                          | <a href="#">DEHA0C07139g</a> | some similarities with splP2329<br>Saccharomyces cerevisiae YPR16<br>SGV1 ser/thr protein kinase, hypoth<br>start                                                                                     |
|                                    |                        |                                                                                                                                 |        |     |     |     |     |     |       |              |                          | <a href="#">KLLA0E14828g</a> | gil27526973lemb CAD36964.1<br>Kluyveromyces lactis serine/threon<br>protein kinase KIN28, start by simi                                                                                               |
|                                    |                        |                                                                                                                                 |        |     |     |     |     |     |       |              |                          | <a href="#">DEHA0C06314g</a> | some similarities with splP0624<br>Saccharomyces cerevisiae YDL01<br>CDC7, hypothetical start                                                                                                         |
|                                    |                        |                                                                                                                                 |        |     |     |     |     |     |       |              |                          | <a href="#">DEHA0B08701g</a> | similar to CA4995 CaYAK1 Cand<br>albicans CaYAK1 putative Ser/t<br>protein kinase, hypothetical start                                                                                                 |
|                                    |                        |                                                                                                                                 |        |     |     |     |     |     |       |              |                          | <a href="#">CAGL0J00539g</a> | highly similar to splQ00772<br>Saccharomyces cerevisiae YHR0<br>SLT2, hypothetical start                                                                                                              |
|                                    |                        |                                                                                                                                 |        |     |     |     |     |     |       |              |                          | <a href="#">KLLA0E12177g</a> | gil4096112 gblAAC99804.1<br>Kluyveromyces lactis CTD kinase la<br>subunit, hypothetical start                                                                                                         |
|                                    |                        |                                                                                                                                 |        |     |     |     |     |     |       |              |                          | <a href="#">DEHA0B00770g</a> | similar to splP32581 Saccharomy<br>cerevisiae YJL106w IME2 ser/thr p<br>kinase, hypothetical start                                                                                                    |
|                                    |                        |                                                                                                                                 |        |     |     |     |     |     |       |              |                          | <a href="#">YALI0D25190g</a> | highly similar to splP17157<br>Saccharomyces cerevisiae YPL03<br>PHO85, hypothetical start                                                                                                            |
|                                    |                        |                                                                                                                                 |        |     |     |     |     |     |       |              |                          | <a href="#">DEHA0E21219g</a> | similar to CA1378 CaERK2 Cand<br>albicans CaERK2 mitogen-activa<br>protein kinase, start by similarit                                                                                                 |
|                                    |                        |                                                                                                                                 |        |     |     |     |     |     |       |              |                          | <a href="#">DEHA0F08987g</a> | similar to CAGL-IPF1383.1 Cand<br>glabrata, hypothetical start                                                                                                                                        |
|                                    |                        |                                                                                                                                 |        |     |     |     |     |     |       |              |                          | <a href="#">CAGL0I05896g</a> | some similarities with splP1468<br>Saccharomyces cerevisiae YJL14<br>YAK1 ser/thr protein kinase,<br>hypothetical start                                                                               |
|                                    |                        |                                                                                                                                 |        |     |     |     |     |     |       |              |                          | <a href="#">KLLA0F20053g</a> | highly similar to splP32485<br>Saccharomyces cerevisiae YLR11<br>HOG1 ser/thr protein kinase of M<br>kinase (MAPK) family, start by<br>similarity                                                     |
|                                    |                        |                                                                                                                                 |        |     |     |     |     |     |       |              |                          | <a href="#">DEHA0E22110g</a> | splQ9UV50 Debaryomyces hanse<br>Mitogen-activated protein kinase H<br>identified start                                                                                                                |
|                                    |                        |                                                                                                                                 |        |     |     |     |     |     |       |              |                          | <a href="#">DEHA0A14080g</a> | highly similar to CA6039 CaCKA<br>Candida albicans CaCKA1 casein k<br>II, catalytic alpha chain, start by<br>similarity                                                                               |
|                                    |                        |                                                                                                                                 |        |     |     |     |     |     |       |              |                          | <a href="#">YALI0E33803g</a> | similar to trIQ9Y7V6 Emericell<br>nidulans MAP protein kinase MPI<br>hypothetical start                                                                                                               |
|                                    |                        |                                                                                                                                 |        |     |     |     |     |     |       |              |                          | <a href="#">YALI0E25135g</a> | highly similar to splP32485<br>Saccharomyces cerevisiae YLR11<br>HOG1 ser/thr protein kinase of M<br>kinase (MAPK) family, hypothetical                                                               |
|                                    |                        |                                                                                                                                 |        |     |     |     |     |     |       |              |                          |                              | highly similar to trIQ9UW09 Glom                                                                                                                                                                      |

|                              |                                                                                                                                                                           |
|------------------------------|---------------------------------------------------------------------------------------------------------------------------------------------------------------------------|
| <a href="#">YAL10E23496g</a> | lagenarium Mitogen activated protein kinase, hypothetical start                                                                                                           |
| <a href="#">CAGL0L06820g</a> | highly similar to splP38615 Saccharomyces cerevisiae YMR13 MDS1 Serine/threonine-protein kinase                                                                           |
| <a href="#">CAGL0G02035g</a> | highly similar to splP19454 Saccharomyces cerevisiae YOR06 CKA2 casein kinase II alpha chain, by similarity                                                               |
| <a href="#">DEHA0G02750g</a> | similar to CA4014 CaCTK1 Candida albicans CaCTK1 probable cell division protein kinase, start by similarity                                                               |
| <a href="#">YAL10B02816g</a> | similar to splQ00772 Saccharomyces cerevisiae Mitogen-activated protein kinase SLT2/MPK1 (EC 2.7.1.-) (Nucleoside diphosphate dependent kinase MPK1), start by similarity |
| <a href="#">KLLA0D11814g</a> | similar to splP39073 Saccharomyces cerevisiae YPL042c SSN3 cyclin dependent CTD kinase, start by similarity                                                               |
| <a href="#">KLLA0B11902g</a> | gil7385125 gblAAF61706.1 AF2267 Kluveromyces lactis MAP kinase, by similarity                                                                                             |
| <a href="#">CAGL0D02002g</a> | similar to splQ03957 Saccharomyces cerevisiae YKL139w CTK1 carboxyl terminal domain kinase, hypothetical start                                                            |
| <a href="#">KLLA0F02838g</a> | some similarities with splP3258 Saccharomyces cerevisiae YJL10 IME2 ser/thr protein kinase, hypothetical start                                                            |
| <a href="#">KLLA0D10527g</a> | similar to splP23293 Saccharomyces cerevisiae YPR161c SGV1 ser/thr protein kinase, hypothetical start                                                                     |
| <a href="#">CAGL0D01694g</a> | similar to splP41808 Saccharomyces cerevisiae YPR054w SMK1 sporulation specific MAP kinase, hypothetical start                                                            |
| <a href="#">YAL10D04334g</a> | similar to splP06242 Saccharomyces cerevisiae YDL108w KIN28 cyclin dependent ser/thr protein kinase, start by similarity                                                  |
| <a href="#">CAGL0I08349g</a> | similar to splP23293 Saccharomyces cerevisiae YPR161c SGV1 ser/thr protein kinase, hypothetical start                                                                     |
| <a href="#">CAGL0K01815g</a> | similar to splP06243 Saccharomyces cerevisiae YDL017w Cell division control protein 7, hypothetical start                                                                 |
| <a href="#">DEHA0F09713g</a> | similar to calCA1467 IPF5082 Candida albicans IPF5082 similar to Saccharomyces cerevisiae Cak1p cell cycle activating protein kinase (by homology), hypothetical start    |
| <a href="#">KLLA0D11990g</a> | gil2499590 splQ92241 PH85_KLUVEROMYCES LACTIS NEGATIVE REGULATOR OF THE PHO SYSTEM, hypothetical start                                                                    |
| <a href="#">YAL10D04114g</a> | weakly similar to trlQ8X0V5 Neurospora crassa Related to putative dual specificity protein kinase pom1, hypothetical start                                                |
| <a href="#">CAGL0K04169g</a> | similar to splP14681 Saccharomyces cerevisiae YGR040w KSS1, start by similarity                                                                                           |
| <a href="#">KLLA0E07414g</a> | highly similar to splP21965 Saccharomyces cerevisiae YNL30 MCK1 ser/thr/tyr protein kinase, start by similarity                                                           |
| <a href="#">YAL10B18700g</a> | similar to trlQ8TG13 Neurospora crassa Casein kinase II alpha subunit CKA2, by similarity                                                                                 |
| <a href="#">YAL10D16863g</a> | trlQ92390 Yarrowia lipolytica casein kinase II catalytic subunit, identified                                                                                              |
| <a href="#">KLLA0C04345g</a> | similar to splP06243 Saccharomyces cerevisiae YDL017w CDC7 protein kinase, start by similarity                                                                            |
|                              | highly similar to splP06242                                                                                                                                               |

|                                |                        |                                                                                           |        |     |     |     |     |     |       |                      |                       |                              |                                                                                                                                                                        |
|--------------------------------|------------------------|-------------------------------------------------------------------------------------------|--------|-----|-----|-----|-----|-----|-------|----------------------|-----------------------|------------------------------|------------------------------------------------------------------------------------------------------------------------------------------------------------------------|
| <a href="#">IME2 (YJL106W)</a> | <a href="#">2.7.1-</a> | splP32581<br>Saccharomyces cerevisiae YJL106w<br>IME2 ser/thr protein kinase P108.1.f12.1 | viable | 0.8 | 0.5 | 0.5 | 0.3 | 0.2 | sckdy | 22 19<br>19 21<br>17 | <a href="#">GLC.8</a> | <a href="#">CAGL0H10318g</a> | Saccharomyces cerevisiae YDL10<br>KIN28 cyclin-dependent ser/thr pro<br>kinase                                                                                         |
|                                |                        |                                                                                           |        |     |     |     |     |     |       |                      |                       | <a href="#">YALI0B22528g</a> | weakly similar to trlO14098<br>Schizosaccharomyces pombe Puta<br>serine/threonine protein kinase, sta<br>similarity                                                    |
|                                |                        |                                                                                           |        |     |     |     |     |     |       |                      |                       | <a href="#">DEHA0G22528g</a> | highly similar to CA3004CaKIN<br>Candida albicans CaKIN28, start<br>similarity                                                                                         |
|                                |                        |                                                                                           |        |     |     |     |     |     |       |                      |                       | <a href="#">KLLA0B11946g</a> | similar to splP41808 Saccharomy<br>cerevisiae YPR054w SMK1 sporula<br>specific MAP kinase, start by simil                                                              |
|                                |                        |                                                                                           |        |     |     |     |     |     |       |                      |                       | <a href="#">DEHA0F26268g</a> | similar to splP41808 Saccharomy<br>cerevisiae YPR054w Sporulation<br>specific mitogen-activated protein k<br>SMK1 (MAP kinase SMK1),<br>hypothetical start, frameshift |
|                                |                        |                                                                                           |        |     |     |     |     |     |       |                      |                       | <a href="#">KLLA0B09790g</a> | highly similar to splP00546<br>Saccharomyces cerevisiae YBR16<br>CDC28 cyclin-dependent protein ki<br>start by similarity                                              |
|                                |                        |                                                                                           |        |     |     |     |     |     |       |                      |                       | <a href="#">DEHA0F26257g</a> | similar to splP41808 Saccharomy<br>cerevisiae YPR054w Sporulation<br>specific mitogen-activated protein k<br>SMK1 (MAP kinase SMK1),<br>hypothetical start, frameshift |
|                                |                        |                                                                                           |        |     |     |     |     |     |       |                      |                       | <a href="#">YALI0F03113g</a> | some similarities with splP3258<br>Saccharomyces cerevisiae YJL10<br>IME2 ser/thr protein kinase, hypoth<br>start                                                      |
|                                |                        |                                                                                           |        |     |     |     |     |     |       |                      |                       | <a href="#">KLLA0F16467g</a> | highly similar to splP19454<br>Saccharomyces cerevisiae YOR06<br>CKA2 casein kinase II alpha chain,<br>by similarity                                                   |
|                                |                        |                                                                                           |        |     |     |     |     |     |       |                      |                       | <a href="#">CAGL0L12474g</a> | highly similar to splP17157<br>Saccharomyces cerevisiae YPL03<br>cyclin-dependent protein kinase, sta<br>similarity                                                    |
|                                |                        |                                                                                           |        |     |     |     |     |     |       |                      |                       | <a href="#">CAGL0M11748g</a> | highly similar to splP32485<br>Saccharomyces cerevisiae YLR11<br>HOG1, start by similarity                                                                             |
|                                |                        |                                                                                           |        |     |     |     |     |     |       |                      |                       | <a href="#">CAGL0E01683g</a> | highly similar to splP21965<br>Saccharomyces cerevisiae YNL30<br>MCK1 or splQ12222 Saccharomy<br>cerevisiae YOL128c, start by simil                                    |
|                                |                        |                                                                                           |        |     |     |     |     |     |       |                      |                       | <a href="#">KLLA0A02497g</a> | highly similar to splP14681<br>Saccharomyces cerevisiae YGR04<br>KSS1 ser/thr protein kinase of the 1<br>kinase family, start by similarity                            |
|                                |                        |                                                                                           |        |     |     |     |     |     |       |                      |                       | <a href="#">CAGL0I04290g</a> | similar to splP16892 Saccharomy<br>cerevisiae YBL016w FUS3 or splP1<br>Saccharomyces cerevisiae YGR04<br>KSS1, start by similarity                                     |
|                                |                        |                                                                                           |        |     |     |     |     |     |       |                      |                       | <a href="#">KLLA0A05819g</a> | similar to splP14680 Saccharomy<br>cerevisiae YJL141c YAK1 ser/thr p<br>kinase, start by similarity                                                                    |
|                                |                        |                                                                                           |        |     |     |     |     |     |       |                      |                       | <a href="#">YALI0D20966g</a> | highly similar to trlQ9HE92 Neuros<br>crassa Probable glycogen synthase k<br>3 alpha, start by similarity                                                              |
|                                |                        |                                                                                           |        |     |     |     |     |     |       |                      |                       | <a href="#">KLLA0F08877g</a> | gil27526975lembICAD36965.1<br>Kluyveromyces lactis cyclin-depen<br>kinase activating kinase 1, start b<br>similarity                                                   |
|                                |                        |                                                                                           |        |     |     |     |     |     |       |                      |                       | <a href="#">DEHA0E05819g</a> | highly similar to CA2027CaMC<br>Candida albicans CaMCK1 ser/thr<br>protein kinase, hypothetical sta                                                                    |
|                                |                        |                                                                                           |        |     |     |     |     |     |       |                      |                       | <a href="#">DEHA0C07469g</a> | highly similar to splP19454<br>Saccharomyces cerevisiae YOR06<br>CKA2, hypothetical start                                                                              |
|                                |                        |                                                                                           |        |     |     |     |     |     |       |                      |                       | <a href="#">YALI0E11077g</a> | similar to splQ07538<br>Schizosaccharomyces pombe<br>SPCC777.14 PRP4 Serine/throni<br>protein kinase, hypothetical sta                                                 |
|                                |                        |                                                                                           |        |     |     |     |     |     |       |                      |                       |                              | similar to splQ00772 Saccharomy                                                                                                                                        |

|  |                              |                                                                                                                                                                                          |
|--|------------------------------|------------------------------------------------------------------------------------------------------------------------------------------------------------------------------------------|
|  | <a href="#">DEHA0E19217g</a> | cerevisiae YHR030c SLT2 ser/thr p<br>kinase of MAP kinase family<br>P108.1.f12.1 Length = 484, start<br>similarity                                                                       |
|  | <a href="#">KLLA0F17006g</a> | gil3127831lembCAA61157.1<br>Kluyveromyces lactis protein kin<br>start by similarity                                                                                                      |
|  | <a href="#">KLLA0E10527g</a> | similar to splP16892 Saccharomy<br>cerevisiae YBL016w FUS3 mitog<br>activated protein kinase (MAP kin<br>start by similarity                                                             |
|  | <a href="#">YALI0D19492g</a> | similar to wilNCU07880.1 Neurosp<br>crassa NCU07880.1 hypothetical pr<br>(15912 - 17477), hypothetical sta                                                                               |
|  | <a href="#">YALI0B10758g</a> | highly similar to splP43063 Cand<br>albicans cell division control protei<br>hypothetical start                                                                                          |
|  | <a href="#">DEHA0F09735g</a> | similar to calCA1468ICaSRB10 Ca<br>albicans CaSRB10 cyclin-depend<br>kinase by homology, 3 end, hypothe<br>start                                                                         |
|  | <a href="#">DEHA0F09647g</a> | similar to wilNCU04185.1 Neurosp<br>crassa NCU04185.1 hypothetical pr<br>( AL451015) probable glycoge<br>synthase kinase 3 alpha [Neurosp<br>crassa] ) (47604 - 49112), hypothe<br>start |
|  | <a href="#">DEHA0G11660g</a> | highly similar to splP43063 Cand<br>albicans Cell division control prote<br>(EC 2.7.1.-), hypothetical start                                                                             |
|  | <a href="#">DEHA0D14256g</a> | highly similar to CA4448ICaPHO<br>Candida albicans CaPHO85 Nega<br>regulator of PHO system, start b<br>similarity                                                                        |
|  | <a href="#">YALI0C10967g</a> | similar to splP39073 Saccharomy<br>cerevisiae YPL042c SSN3 cyclin<br>dependent CTD kinase, hypothetical                                                                                  |
|  | <a href="#">CAGL0K12496g</a> | similar to splP43568 Saccharomy<br>cerevisiae YFL029c CAK1 cdk<br>activating protein kinase, hypothet<br>start                                                                           |
|  | <a href="#">CAGL0L12650g</a> | similar to splP39073 Saccharomy<br>cerevisiae YPL042c cyclin-depend<br>CTD kinase, hypothetical start                                                                                    |
|  | <a href="#">CAGL0G04455g</a> | similar to splP32581 Saccharomy<br>cerevisiae YJL106w IME2 ser/thr p<br>kinase, hypothetical start                                                                                       |
|  | <a href="#">KLLA0E04136g</a> | similar to splP15790 Saccharomy<br>cerevisiae YIL035c CKA1 casein k<br>II, catalytic alpha chain, start by<br>similarity                                                                 |
|  | <a href="#">CAGL0H07535g</a> | highly similar to splP00546<br>Saccharomyces cerevisiae YBR16<br>CDC28, start by similarity                                                                                              |
|  | <a href="#">CAGL0I05192g</a> | highly similar to splP15790<br>Saccharomyces cerevisiae YIL03<br>CKA1 casein kinase II, start by simi                                                                                    |
|  | <a href="#">DEHA0E04290g</a> | highly similar to CA0722ICaERK<br>Candida albicans CaERK1 mitog<br>activated protein kinase (FUS3<br>homolog), hypothetical start                                                        |
|  | <a href="#">YALI0C24321g</a> | weakly similar to splP43568<br>Saccharomyces cerevisiae YFL02<br>CAK1 cdk-activating protein kin<br>hypothetical start                                                                   |
|  | <a href="#">YALI0F21065g</a> | triQ9Y7W8 Yarrowia lipolytica<br>ser/thr/tyr MAP kinase kinase, no                                                                                                                       |
|  | <a href="#">YALI0B15906g</a> | similar to splP08018 Saccharomy<br>cerevisiae YJL128c PBS2 tyrosin<br>protein kinase of the MAP kinase k<br>family P108.1.f2.4, start by simila                                          |
|  | <a href="#">DEHA0B12672g</a> | similar to splO14427 Candida albi<br>Serine/threonine-protein kinase CI<br>start by similarity                                                                                           |



|                                                                                                                                                                                                                                                                                                                                                     |                                     |                                                                                                                                                                  |
|-----------------------------------------------------------------------------------------------------------------------------------------------------------------------------------------------------------------------------------------------------------------------------------------------------------------------------------------------------|-------------------------------------|------------------------------------------------------------------------------------------------------------------------------------------------------------------|
| <p><a href="#">PBS2 (YJL128C)</a></p> <p><a href="#">2.7.1-</a></p> <p>splP08018 Saccharomyces cerevisiae YJL128c PBS2 tyrosine protein kinase of the MAP kinase kinase family P108.1.f2.4</p> <p>Exhibits sensitivity at 15 generations when grown in medium of pH 8.</p> <p>Ess Ess Ess 0.3 Ess sckdy 7 5 4 4 3</p> <p><a href="#">GLC.52</a></p> | <p><a href="#">CAGL0M03729g</a></p> | <p>similar to splP48562 Saccharomyces cerevisiae YNL298w CLA4, start similarity</p>                                                                              |
|                                                                                                                                                                                                                                                                                                                                                     | <p><a href="#">KLLA0A07403g</a></p> | <p>similar to splP48562 Saccharomyces cerevisiae YNL298w CLA4 ser/thr protein kinase, start by similarity</p>                                                    |
|                                                                                                                                                                                                                                                                                                                                                     | <p><a href="#">CAGL0L05632g</a></p> | <p>similar to splP08018 Saccharomyces cerevisiae YJL128c PBS2, hypothetical start</p>                                                                            |
|                                                                                                                                                                                                                                                                                                                                                     | <p><a href="#">KLLA0E15378g</a></p> | <p>some similarities with splP08018 Saccharomyces cerevisiae YJL128c PBS2 tyrosine protein kinase of the MAP kinase kinase family, hypothetical start</p>        |
|                                                                                                                                                                                                                                                                                                                                                     | <p><a href="#">CAGL0I03498g</a></p> | <p>similar to splP06784 Saccharomyces cerevisiae YDL159w STE7 ser/thr protein kinase of MAP kinase kinase family, hypothetical start</p>                         |
|                                                                                                                                                                                                                                                                                                                                                     | <p><a href="#">CAGL0H01639g</a></p> | <p>similar to splP08458 Saccharomyces cerevisiae YDR523c SPS1 ser/thr protein kinase, hypothetical start</p>                                                     |
|                                                                                                                                                                                                                                                                                                                                                     | <p><a href="#">YALI0D07502g</a></p> | <p>weakly similar to splP08458 Saccharomyces cerevisiae YDR523c SPS1 ser/thr protein kinase, start by similarity</p>                                             |
|                                                                                                                                                                                                                                                                                                                                                     | <p><a href="#">DEHA0C17204g</a></p> | <p>similar to CA4577/CaMKK2 Candida albicans, start by similarity</p>                                                                                            |
|                                                                                                                                                                                                                                                                                                                                                     | <p><a href="#">KLLA0C16577g</a></p> | <p>some similarities with splP06784 Saccharomyces cerevisiae YDL159w STE7 ser/thr/tyr protein kinase of MAP kinase kinase family, hypothetical start</p>         |
|                                                                                                                                                                                                                                                                                                                                                     | <p><a href="#">KLLA0D07304g</a></p> | <p>some similarities with splP32490 Saccharomyces cerevisiae YPL140w MKK2 protein kinase of the map kinase kinase (MEK) family, hypothetical start</p>           |
|                                                                                                                                                                                                                                                                                                                                                     | <p><a href="#">CAGL0J03828g</a></p> | <p>similar to splP32490 Saccharomyces cerevisiae YOR231w MKK1 ser/thr protein kinase or splP32491 Saccharomyces cerevisiae YPL140w MKK2, start by similarity</p> |
|                                                                                                                                                                                                                                                                                                                                                     | <p><a href="#">DEHA0C09416g</a></p> | <p>similar to splP08018 Saccharomyces cerevisiae YJL128c PBS2, hypothetical start</p>                                                                            |
|                                                                                                                                                                                                                                                                                                                                                     | <p><a href="#">DEHA0F15719g</a></p> | <p>similar to calCA1623/CaSTE7 Candida albicans CaSTE7 MAP Kinase Kinase, hypothetical start</p>                                                                 |
|                                                                                                                                                                                                                                                                                                                                                     |                                     | <p><a href="#">DEHA0C07139g</a></p>                                                                                                                              |
|                                                                                                                                                                                                                                                                                                                                                     | <p><a href="#">KLLA0E14828g</a></p> | <p>gil27526973/lemb/CAD36964.1 Kluyveromyces lactis serine/threonine protein kinase KIN28, start by similarity</p>                                               |
|                                                                                                                                                                                                                                                                                                                                                     | <p><a href="#">DEHA0C06314g</a></p> | <p>some similarities with splP06240 Saccharomyces cerevisiae YDL010w CDC7, hypothetical start</p>                                                                |
|                                                                                                                                                                                                                                                                                                                                                     | <p><a href="#">DEHA0B08701g</a></p> | <p>similar to CA4995/CaYAK1 Candida albicans CaYAK1 putative Ser/thr protein kinase, hypothetical start</p>                                                      |
|                                                                                                                                                                                                                                                                                                                                                     | <p><a href="#">CAGL0J00539g</a></p> | <p>highly similar to splQ00772 Saccharomyces cerevisiae YHR001w SLT2, hypothetical start</p>                                                                     |
|                                                                                                                                                                                                                                                                                                                                                     | <p><a href="#">KLLA0E12177g</a></p> | <p>gil4096112/gblAAC99804.1 Kluyveromyces lactis CTD kinase large subunit, hypothetical start</p>                                                                |
|                                                                                                                                                                                                                                                                                                                                                     | <p><a href="#">DEHA0B00770g</a></p> | <p>similar to splP32581 Saccharomyces cerevisiae YJL106w IME2 ser/thr protein kinase, hypothetical start</p>                                                     |
|                                                                                                                                                                                                                                                                                                                                                     | <p><a href="#">YALI0D25190g</a></p> | <p>highly similar to splP17157 Saccharomyces cerevisiae YPL030w PHO85, hypothetical start</p>                                                                    |
|                                                                                                                                                                                                                                                                                                                                                     | <p><a href="#">DEHA0E21219g</a></p> | <p>similar to CA1378/CaERK2 Candida albicans CaERK2 mitogen-activated protein kinase, start by similarity</p>                                                    |
|                                                                                                                                                                                                                                                                                                                                                     | <p><a href="#">DEHA0E08087g</a></p> | <p>similar to CAGL-IPF1383.1 Candida albicans</p>                                                                                                                |

|                              |                                                                                                                                       |
|------------------------------|---------------------------------------------------------------------------------------------------------------------------------------|
| <a href="#">DEHA0I06297g</a> | glabrata, hypothetical start                                                                                                          |
| <a href="#">CAGL0I05896g</a> | some similarities with splP1468 Saccharomyces cerevisiae YJL14 YAK1 ser/thr protein kinase, hypothetical start                        |
| <a href="#">KLLA0F20053g</a> | highly similar to splP32485 Saccharomyces cerevisiae YLR11 HOG1 ser/thr protein kinase of M kinase (MAPK) family, start by similarity |
| <a href="#">DEHA0E22110g</a> | splQ9UV50 Debaryomyces hanse Mitogen-activated protein kinase H identified start                                                      |
| <a href="#">DEHA0A14080g</a> | highly similar to CA6039 CaCKA Candida albicans CaCKA1 casein k II, catalytic alpha chain, start by similarity                        |
| <a href="#">YAL0E33803g</a>  | similar to trlQ9Y7V6 Emericell nidulans MAP protein kinase MPK hypothetical start                                                     |
| <a href="#">YAL0E25135g</a>  | highly similar to splP32485 Saccharomyces cerevisiae YLR11 HOG1 ser/thr protein kinase of M kinase (MAPK) family, hypothetical        |
| <a href="#">YAL0E23496g</a>  | highly similar to trlQ9UW09 Glom lagenarium Mitogen activated pro kinase, hypothetical start                                          |
| <a href="#">CAGL0L06820g</a> | highly similar to splP38615 Saccharomyces cerevisiae YMR13 MDS1 Serine/threonine-protein ki                                           |
| <a href="#">CAGL0G02035g</a> | highly similar to splP19454 Saccharomyces cerevisiae YOR06 CKA2 casein kinase II alpha chain, by similarity                           |
| <a href="#">DEHA0G02750g</a> | similar to CA4014 CaCTK1 Cand albicans CaCTK1 probable cell div protein kinase, start by similarit                                    |
| <a href="#">YAL0B02816g</a>  | similar to splQ00772 Saccharomy cerevisiae Mitogen-activated prot kinase SLT2/MPK1 (EC 2.7.1.-) (M kinase MPK1), start by similarit   |
| <a href="#">KLLA0D11814g</a> | similar to splP39073 Saccharomy cerevisiae YPL042c SSN3 cyclin dependent CTD kinase, start by simi                                    |
| <a href="#">KLLA0B11902g</a> | gil7385125 gblAAF61706.1 AF2267 Kluveromyces lactis MAP kinase, by similarity                                                         |
| <a href="#">CAGL0D02002g</a> | similar to splQ03957 Saccharomy cerevisiae YKL139w CTK1 carbo terminal domain kinase, hypotheti start                                 |
| <a href="#">KLLA0F02838g</a> | some similarities with splP3258 Saccharomyces cerevisiae YJL10 IME2 ser/thr protein kinase, hypothe start                             |
| <a href="#">KLLA0D10527g</a> | similar to splP23293 Saccharomy cerevisiae YPR161c SGV1 ser/t protein kinase, hypothetical star                                       |
| <a href="#">CAGL0D01694g</a> | similar to splP41808 Saccharomy cerevisiae YPR054w SMK1 sporula specific MAP kinase, hypothetical                                     |
| <a href="#">YAL0D04334g</a>  | similar to splP06242 Saccharomy cerevisiae YDL108w KIN28 cycl dependent ser/thr protein kinase, sta similarity                        |
| <a href="#">CAGL0I08349g</a> | similar to splP23293 Saccharomy cerevisiae YPR161c SGV1 ser/t protein kinase, hypothetical star                                       |
| <a href="#">CAGL0K01815g</a> | similar to splP06243 Saccharomy cerevisiae YDL017w Cell divisio control protein 7, hypothetical sta                                   |
| <a href="#">DEHA0F09713g</a> | similar to calCA1467 IPF5082 Can albicans IPF5082 similar to Saccharomyces cerevisiae Cak1p c                                         |



|                              |                                                                                                                                                                                         |
|------------------------------|-----------------------------------------------------------------------------------------------------------------------------------------------------------------------------------------|
| <a href="#">CAGL0J04290g</a> | similar to splP16892 Saccharomyces cerevisiae YBL016w FUS3 or splP16892 Saccharomyces cerevisiae YGR042w KSS1, start by similarity                                                      |
| <a href="#">KLLA0A05819g</a> | similar to splP14680 Saccharomyces cerevisiae YJL141c YAK1 ser/thr protein kinase, start by similarity                                                                                  |
| <a href="#">YALI0D20966g</a> | highly similar to trlQ9HE92 Neurospora crassa Probable glycogen synthase kinase 3 alpha, start by similarity                                                                            |
| <a href="#">KLLA0F08877g</a> | gil27526975lemb CAD36965.1 Kluyveromyces lactis cyclin-dependent kinase activating kinase 1, start by similarity                                                                        |
| <a href="#">DEHA0E05819g</a> | highly similar to CA2027 CaMCK1 Candida albicans CaMCK1 ser/thr protein kinase, hypothetical start                                                                                      |
| <a href="#">DEHA0C07469g</a> | highly similar to splP19454 Saccharomyces cerevisiae YOR062w CKA2, hypothetical start                                                                                                   |
| <a href="#">YALI0E11077g</a> | similar to splQ07538 Schizosaccharomyces pombe SPCC777.14 PRP4 Serine/threonine protein kinase, hypothetical start                                                                      |
| <a href="#">DEHA0E19217g</a> | similar to splQ00772 Saccharomyces cerevisiae YHR030c SLT2 ser/thr protein kinase of MAP kinase family P108.1.f12.1 Length = 484, start by similarity                                   |
| <a href="#">KLLA0F17006g</a> | gil3127831lemb CAA61157.1 Kluyveromyces lactis protein kinase, start by similarity                                                                                                      |
| <a href="#">KLLA0E10527g</a> | similar to splP16892 Saccharomyces cerevisiae YBL016w FUS3 mitogen-activated protein kinase (MAP kinase), start by similarity                                                           |
| <a href="#">YALI0D19492g</a> | similar to wilNCU07880.1 Neurospora crassa NCU07880.1 hypothetical protein (15912 - 17477), hypothetical start                                                                          |
| <a href="#">YALI0B10758g</a> | highly similar to splP43063 Candida albicans cell division control protein, hypothetical start                                                                                          |
| <a href="#">DEHA0F09735g</a> | similar to calCA1468 CaSRB10 Candida albicans CaSRB10 cyclin-dependent kinase by homology, 3 end, hypothetical start                                                                    |
| <a href="#">DEHA0F09647g</a> | similar to wilNCU04185.1 Neurospora crassa NCU04185.1 hypothetical protein (AL451015) probable glycogen synthase kinase 3 alpha [Neurospora crassa] (47604 - 49112), hypothetical start |
| <a href="#">DEHA0G11660g</a> | highly similar to splP43063 Candida albicans Cell division control protein (EC 2.7.1.-), hypothetical start                                                                             |
| <a href="#">DEHA0D14256g</a> | highly similar to CA4448 CaPHO85 Candida albicans CaPHO85 Negative regulator of PHO system, start by similarity                                                                         |
| <a href="#">YALI0C10967g</a> | similar to splP39073 Saccharomyces cerevisiae YPL042c SSN3 cyclin-dependent CTD kinase, hypothetical start                                                                              |
| <a href="#">CAGL0K12496g</a> | similar to splP43568 Saccharomyces cerevisiae YFL029c CAK1 cdk-activating protein kinase, hypothetical start                                                                            |
| <a href="#">CAGL0L12650g</a> | similar to splP39073 Saccharomyces cerevisiae YPL042c cyclin-dependent CTD kinase, hypothetical start                                                                                   |
| <a href="#">CAGL0G04455g</a> | similar to splP32581 Saccharomyces cerevisiae YJL106w IME2 ser/thr protein kinase, hypothetical start                                                                                   |
| <a href="#">KLLA0E04136g</a> | similar to splP15790 Saccharomyces cerevisiae YIL035c CKA1 casein kinase                                                                                                                |

|  |  |  |  |  |  |  |  |  |  |                              |                                                                                                                                        |
|--|--|--|--|--|--|--|--|--|--|------------------------------|----------------------------------------------------------------------------------------------------------------------------------------|
|  |  |  |  |  |  |  |  |  |  | <a href="#">KLLA0E7130g</a>  | II, catalytic alpha chain, start by similarity                                                                                         |
|  |  |  |  |  |  |  |  |  |  | <a href="#">CAGL0H07535g</a> | highly similar to splP00546 Saccharomyces cerevisiae YBR16 CDC28, start by similarity                                                  |
|  |  |  |  |  |  |  |  |  |  | <a href="#">CAGL0I05192g</a> | highly similar to splP15790 Saccharomyces cerevisiae YIL03CKA1 casein kinase II, start by similarity                                   |
|  |  |  |  |  |  |  |  |  |  | <a href="#">DEHA0E04290g</a> | highly similar to CA0722 CaERK1 Candida albicans CaERK1 mitogen-activated protein kinase (FUS3 homolog), hypothetical start            |
|  |  |  |  |  |  |  |  |  |  | <a href="#">YALI0C24321g</a> | weakly similar to splP43568 Saccharomyces cerevisiae YFL02CAK1 cdk-activating protein kinase, hypothetical start                       |
|  |  |  |  |  |  |  |  |  |  | <a href="#">KLLA0F11319g</a> | similar to sgdlS0006071 Saccharomyces cerevisiae YPL150w, start by similarity                                                          |
|  |  |  |  |  |  |  |  |  |  | <a href="#">CAGL0L07810g</a> | similar to splP25333 Saccharomyces cerevisiae YCR008w SAT4 serine/threonine-specific protein kinase, start by similarity               |
|  |  |  |  |  |  |  |  |  |  | <a href="#">CAGL0K11550g</a> | similar to splP28708 Saccharomyces cerevisiae YKL116c, hypothetical start                                                              |
|  |  |  |  |  |  |  |  |  |  | <a href="#">YALI0F11385g</a> | weakly similar to SPIP38691 Saccharomyces cerevisiae YHR08KSP1 ser/thr protein kinase and DEIPF5974.1, start by similarity             |
|  |  |  |  |  |  |  |  |  |  | <a href="#">KLLA0A09713g</a> | similar to splQ03533 Saccharomyces cerevisiae YMR291w, start by similarity                                                             |
|  |  |  |  |  |  |  |  |  |  | <a href="#">KLLA0E17127g</a> | similar to splP38691 Saccharomyces cerevisiae YHR082c KSP1 ser/thr protein kinase, start by similarity                                 |
|  |  |  |  |  |  |  |  |  |  | <a href="#">YALI0C04158g</a> | similar to splP18961 Saccharomyces cerevisiae Serine/threonine-protein kinase YPK2/YKR2, hypothetical start                            |
|  |  |  |  |  |  |  |  |  |  | <a href="#">DEHA0F24676g</a> | similar to splP24719 Saccharomyces cerevisiae YOR351c MEK1 ser/thr protein kinase                                                      |
|  |  |  |  |  |  |  |  |  |  | <a href="#">DEHA0G14817g</a> | similar to CA2643 CaHSL1 Candida albicans CaHSL1, hypothetical start                                                                   |
|  |  |  |  |  |  |  |  |  |  | <a href="#">DEHA0C18150g</a> | similar to splP40494 Saccharomyces cerevisiae YIL095w PRK1 serine/threonine protein kinase, start by similarity                        |
|  |  |  |  |  |  |  |  |  |  | <a href="#">CAGL0K10604g</a> | similar to splP27466 Saccharomyces cerevisiae YFR014c CMK1 Ca2+/calmodulin-dependent ser/thr protein kinase type I, hypothetical start |
|  |  |  |  |  |  |  |  |  |  | <a href="#">DEHA0C08591g</a> | similar to splP22204 Saccharomyces cerevisiae YGR092w DBF2, hypothetical start, sequence gap                                           |
|  |  |  |  |  |  |  |  |  |  | <a href="#">YALI0F13629g</a> | some similarities with splP2356 Saccharomyces cerevisiae YLR36STE11 ser/thr protein kinase of the MEKK family, hypothetical start      |
|  |  |  |  |  |  |  |  |  |  | <a href="#">KLLA0C06138g</a> | similar to splP32562 Saccharomyces cerevisiae YMR001c CDC5 involved in regulation of DNA replication, start by similarity              |
|  |  |  |  |  |  |  |  |  |  | <a href="#">YALI0F16159g</a> | some similarities with wilNCU009 Neurospora crassa NCU00914, hypothetical protein, hypothetical start                                  |
|  |  |  |  |  |  |  |  |  |  | <a href="#">CAGL0K08514g</a> | similar to splP34244 Saccharomyces cerevisiae YKL101w serine/threonine protein kinase, hypothetical start                              |
|  |  |  |  |  |  |  |  |  |  | <a href="#">DEHA0F25278g</a> | similar to calCA1881 CaRCK2 Candida albicans CaRCK2 Ca/calmodulin-dependent ser/thr protein kinase (homology), hypothetical start      |
|  |  |  |  |  |  |  |  |  |  | <a href="#">KLLA0F26983g</a> | some similarities with splP3280 Saccharomyces cerevisiae YKL04ELM1 ser/thr-specific protein kinase, hypothetical start                 |

|                              |                                                                                                                                                                                                                            |
|------------------------------|----------------------------------------------------------------------------------------------------------------------------------------------------------------------------------------------------------------------------|
| <a href="#">DEHA0C11484g</a> | similar to splP22211 Saccharomyces cerevisiae YNL183c NPR1 or trlQ1 Saccharomyces cerevisiae YDL02 hypothetical start                                                                                                      |
| <a href="#">YALI0C00891g</a> | similar to splO14019 Schizosaccharomyces pombe Probserine/threonine-protein kinase C29A4.16 (EC 2.7.1.-), hypothetical start                                                                                               |
| <a href="#">KLLA0F23507g</a> | similar to splP24719 Saccharomyces cerevisiae YOR351c MEK1 ser/threonine protein kinase, start by similarity                                                                                                               |
| <a href="#">CAGL0F03245g</a> | similar to splP32361 Saccharomyces cerevisiae YHR079c IRE1, hypothetical start                                                                                                                                             |
| <a href="#">CAGL0K11990g</a> | some similarities with splP3808 Saccharomyces cerevisiae YBR05 AKL1 Ark-family Kinase-Like protein, hypothetical start                                                                                                     |
| <a href="#">DEHA0G10417g</a> | similar to CA1971CaPKH2 Candida albicans CaPKH2 Ser/Thr protein kinase(by homology), hypothetical start                                                                                                                    |
| <a href="#">YALI0B17556g</a> | weakly similar to trlQ9Y898 Emergomyces nidulans Calcium/calmodulin dependent protein kinase C, hypothetical start                                                                                                         |
| <a href="#">CAGL0G03047g</a> | highly similar to splP22204 Saccharomyces cerevisiae YGR09 DBF2 ser/thrprotein kinase or splP3 Saccharomyces cerevisiae YPR11 DBF20, hypothetical start                                                                    |
| <a href="#">YALI0F27093g</a> | weakly similar to DEHA-IPF372 Debaryomyces hansenii, hypothetical start                                                                                                                                                    |
| <a href="#">DEHA0C14091g</a> | similar to splP37292 Saccharomyces cerevisiae YBR263w SHM1, hypothetical start                                                                                                                                             |
| <a href="#">DEHA0C18601g</a> | similar to CA4433CaBCK1 Candida albicans, hypothetical start                                                                                                                                                               |
| <a href="#">KLLA0C04213g</a> | similar to splP22209 Saccharomyces cerevisiae YAR018c KIN3 ser/thr protein kinase, hypothetical start                                                                                                                      |
| <a href="#">YALI0A04697g</a> | similar to splO42626 Neurospora crassa Serine/threonine-protein kinase nrp1 (Nonrepressible conidiation protein), hypothetical start                                                                                       |
| <a href="#">YALI0D26015g</a> | similar to splP32562 Saccharomyces cerevisiae Cell cycle protein kinase CDC5/MSD2 (EC 2.7.1.-), hypothetical start                                                                                                         |
| <a href="#">DEHA0G14839g</a> | highly similar to sCA3870CaYP Candida albicans CaYPK1, start by similarity                                                                                                                                                 |
| <a href="#">KLLA0C14278g</a> | similar to splP28708 Saccharomyces cerevisiae YKL116c, hypothetical start                                                                                                                                                  |
| <a href="#">YALI0E13750g</a> | similar to trlCAD79666 Neurospora crassa B1D14.230 Related to serine/threonine-protein kinase a DEHA-IPF6149.1 Debaryomyces hansenii, no start                                                                             |
| <a href="#">CAGL0B04147g</a> | highly similar to splP22204 Saccharomyces cerevisiae YGR09 DBF2 ser/thrprotein kinase related to DBF20P or splP32328 Saccharomyces cerevisiae YPR111w DBF20 cell cycle protein kinase related to DBF20, hypothetical start |
| <a href="#">DEHA0F13497g</a> | similar to calCA1299CaPTK2 Candida albicans CaPTK2 serine /threonine protein kinase involved in polyamine uptake (by homology), hypothetical start                                                                         |
| <a href="#">DEHA0D13684g</a> | similar to CA4865HPPF4085 Candida albicans IPF4085, start by similarity                                                                                                                                                    |
| <a href="#">CAGL0L06006g</a> | similar to splP53104 Saccharomyces cerevisiae YGL180w APG1 essential for autophagocytosis, hypothetical start                                                                                                              |

|                              |                                                                                                                                                                        |
|------------------------------|------------------------------------------------------------------------------------------------------------------------------------------------------------------------|
| <a href="#">CAGL0E05720g</a> | similar to splP38991 Saccharomyces cerevisiae YPL209c IPL1 ser/thr protein kinase, start by similarity                                                                 |
| <a href="#">KLLA0F18612g</a> | some similarities with splP3808 Saccharomyces cerevisiae YBR05c AKL1 Ark-family Kinase-Like protein, hypothetical start                                                |
| <a href="#">YALI0E24563g</a> | similar to trlQ12152 Saccharomyces cerevisiae YPL150w, hypothetical start                                                                                              |
| <a href="#">DEHA0F24013g</a> | similar to calCA5226lCaRIM15 Candida albicans CaRIM15 Protein kinase, involved in the RIM pathway (by homology), hypothetical start                                    |
| <a href="#">CAGL0I04422g</a> | some similarities with splP2220 Saccharomyces cerevisiae YAR05c KIN3 ser/thr protein kinase, hypothetical start                                                        |
| <a href="#">CAGL0K01661g</a> | some similarities with trlQ1210 Saccharomyces cerevisiae YDL02c, hypothetical start                                                                                    |
| <a href="#">DEHA0E15741g</a> | highly similar to CA3361lCaSNF1 Candida albicans CaSNF1 serine/threonine protein kinase, hypothetical start                                                            |
| <a href="#">CAGL0M02233g</a> | highly similar to splP22216 Saccharomyces cerevisiae YPL15c SPK1 ser/thr/tyr protein kinase, hypothetical start                                                        |
| <a href="#">CAGL0F04741g</a> | similar to splP22517 Saccharomyces cerevisiae YOL016c CMK2 Ca <sup>2+</sup> /calmodulin-dependent ser/thr protein kinase, type II, hypothetical start                  |
| <a href="#">YALI0E06523g</a> | weakly similar to splP34244 Saccharomyces cerevisiae YKL10c HSL1 ser/thr protein kinase, coupled to septin ring assembly to cell cycle progression, hypothetical start |
| <a href="#">KLLA0E11979g</a> | some similarities with splP2533 Saccharomyces cerevisiae YCR00c SAT4 serine/threonine-specific protein kinase, hypothetical start                                      |
| <a href="#">CAGL0J11308g</a> | similar to splP22211 Saccharomyces cerevisiae YNL183c NPR1 ser/thr protein kinase, hypothetical start                                                                  |
| <a href="#">DEHA0G11638g</a> | similar to splP25333 Saccharomyces cerevisiae YCR008w SAT4 serine/threonine-specific protein kinase, hypothetical start                                                |
| <a href="#">CAGL0H10208g</a> | similar to splP38080 Saccharomyces cerevisiae YBR059c AKL1 Ark-family Kinase-Like protein, hypothetical start                                                          |
| <a href="#">CAGL0B02739g</a> | similar to splP23561 Saccharomyces cerevisiae YLR362w STE11 ser/thr protein kinase of the MEKK family, hypothetical start                                              |
| <a href="#">YALI0D07150g</a> | weakly similar to trlQ9C2E8 Neurospora crassa Conserved hypothetical protein, start by similarity                                                                      |
| <a href="#">DEHA0F10197g</a> | highly similar to calCA2265lCaCMK2 Candida albicans CaCMK2 Ca <sup>2+</sup> /calmodulin-dependent ser/thr protein kinase, type II (by homology), hypothetical start    |
| <a href="#">DEHA0B12628g</a> | similar to splP06245 Saccharomyces cerevisiae YPL203w TPK2 cAMP-dependent protein kinase 2, catalytic chain, start by similarity                                       |
| <a href="#">DEHA0E13574g</a> | similar to CA2193lIPF14273 Candida albicans IPF14273 Probable ser/thr protein kinase                                                                                   |
| <a href="#">KLLA0D07348g</a> | weakly similar to sgdS000606 Saccharomyces cerevisiae YPL14c, start by similarity                                                                                      |
|                              | some similarities with splP3897 Saccharomyces cerevisiae YPL16c                                                                                                        |

|                              |                                                                                                                                                                                                     |
|------------------------------|-----------------------------------------------------------------------------------------------------------------------------------------------------------------------------------------------------|
| <a href="#">DEHA0B12650g</a> | Saccharomyces cerevisiae YJL10<br>HAL5 ser/thr protein kinase, hypothet<br>start                                                                                                                    |
| <a href="#">DEHA0F04114g</a> | similar to CA0576 CaNPR1 Candida<br>albicans CaNPR1, hypothetical sta                                                                                                                               |
| <a href="#">DEHA0C13211g</a> | similar to splP22216 Saccharomy<br>cerevisiae YPL153c SPK1, hypothet<br>start                                                                                                                       |
| <a href="#">KLLA0B07205g</a> | some similarities with splP0598<br>Saccharomyces cerevisiae YKL10<br>TPK3 cAMP-dependent protein kin<br>catalytic chain, hypothetical sta                                                           |
| <a href="#">CAGL0K06479g</a> | some similarities with trlQ0330<br>Saccharomyces cerevisiae YDR46<br>start by similarity                                                                                                            |
| <a href="#">KLLA0C12485g</a> | weakly similar to splQ12236<br>Saccharomyces cerevisiae YOL10<br>PKH2, start by similarity                                                                                                          |
| <a href="#">KLLA0E06413g</a> | gil22858696 gblAAN05732.1<br>Kluyveromyces lactis protein kinas<br>start by similarity                                                                                                              |
| <a href="#">YALI0D26213g</a> | weakly similar to trlQ96WJ8 Blum<br>graminis Protein kinase C-like pro<br>hypothetical start                                                                                                        |
| <a href="#">DEHA0G14707g</a> | similar to CA6135 CaCMK1 Candida<br>albicans CaCMK1, hypothetical s                                                                                                                                 |
| <a href="#">DEHA0E16115g</a> | similar to CA5074 IPF3607 Candida<br>albicans IPF3607 putative<br>serine/threonine protein kinase<br>hypothetical start                                                                             |
| <a href="#">CAGL0M13167g</a> | similar to splP32801 Saccharomy<br>cerevisiae YKL048c ELM1 ser/thr<br>specific protein kinase, hypothetical                                                                                         |
| <a href="#">KLLA0F01408g</a> | weakly similar to sgd S000218<br>Saccharomyces cerevisiae YDL02<br>hypothetical start                                                                                                               |
| <a href="#">DEHA0F25212g</a> | highly similar to trlQ9HEW0 Candida<br>albicans cAMP-dependent protein k<br>catalytic subunit, hypothetical sta                                                                                     |
| <a href="#">CAGL0M08404g</a> | some similarities with splP0598<br>Saccharomyces cerevisiae YKL10<br>TPK3 or splP06244 Saccharomy<br>cerevisiae YJL164c SRA3 or splP0<br>Saccharomyces cerevisiae YPL20<br>TPK2, hypothetical start |
| <a href="#">KLLA0A03806g</a> | gil2181934 lemb CAA61235.1<br>Kluyveromyces lactis putative kin<br>start by similarity                                                                                                              |
| <a href="#">YALI0D19470g</a> | similar to trlQ871H9 Neurospora cr<br>B16M17.090 Related to Ste20-li<br>kinase Don3, hypothetical start                                                                                             |
| <a href="#">YALI0A10230g</a> | similar to splP22211 Saccharomy<br>cerevisiae YNL183c NPR1 ser/thr<br>protein kinase, start by similarit                                                                                            |
| <a href="#">DEHA0F10461g</a> | some similarities with<br>calCA1288 CaKSP1 Candida albica<br>CaKSP1 SERINE/THREONINE<br>PROTEIN KINASE by homolog<br>hypothetical start                                                             |
| <a href="#">YALI0F01716g</a> | trlQ9P860 Yarrowia lipolytica Wee<br>protein, mitosis inhibitor protein ki<br>hypothetical start                                                                                                    |
| <a href="#">YALI0E27632g</a> | trlO93955 Yarrowia lipolytica SS<br>protein, multicopy suppressor of S<br>secretory defects, putative calmodu<br>dependent ser/thr protein kinase<br>identified start                               |
| <a href="#">CAGL0I09504g</a> | similar to splP38147 Saccharomy<br>cerevisiae YBR274w CHK1 regul<br>inhibitory Cdk phosphorylation of F<br>start by similarity                                                                      |
| <a href="#">CAGL0F09075g</a> | similar to splP11792 Saccharomy<br>cerevisiae YHR205w SCH9<br>serine/threonine protein kinase, sta<br>similarity                                                                                    |



|                                |                         |                                                                                                   |                                                        |     |     |     |     |     |       |                      |
|--------------------------------|-------------------------|---------------------------------------------------------------------------------------------------|--------------------------------------------------------|-----|-----|-----|-----|-----|-------|----------------------|
| <a href="#">ELM1 (YKL048C)</a> | <a href="#">2.7.1.-</a> | splP32801<br>Saccharomyces cerevisiae YKL048c<br>ELM1 ser/thr-specific protein kinase P108.1.f3.2 | Exhibits growth defect on a fermentable carbon source. | 0.4 | 0.1 | Ess | 0.3 | 0.2 | sckdy | 57 58<br>49 54<br>42 |
|--------------------------------|-------------------------|---------------------------------------------------------------------------------------------------|--------------------------------------------------------|-----|-----|-----|-----|-----|-------|----------------------|

|                              |                                                                                                                                                         |
|------------------------------|---------------------------------------------------------------------------------------------------------------------------------------------------------|
| <a href="#">DEHA0C17996g</a> | similar to CA2348 IPF12811 Candida albicans, putative serine/threonine kinase, hypothetical start                                                       |
| <a href="#">CAGL0H00979g</a> | similar to trlQ12003 Saccharomyces cerevisiae YPL236c, hypothetical start                                                                               |
| <a href="#">KLLA0C03828g</a> | similar to splP54199 Saccharomyces cerevisiae YDL028c MPS1 serine/threonine/tyrosine protein kinase, hypothetical start                                 |
| <a href="#">KLLA0F14190g</a> | gil3021329 emblCAA06336.1 Kluyveromyces lactis MAP kinase kinase, start by similarity                                                                   |
| <a href="#">CAGL0M10153g</a> | some similarities with splQ0349 Saccharomyces cerevisiae YHL001 ser/thr protein kinase of the pheromone pathway, hypothetical start                     |
| <a href="#">KLLA0F24618g</a> | similar to splP38070 Saccharomyces cerevisiae YBR028c, start by similarity                                                                              |
| <a href="#">CAGL0K07458g</a> | similar to splP12688 Saccharomyces cerevisiae YKL126w or splP1899 Saccharomyces cerevisiae YMR101 ser/thr-specific protein kinases, start by similarity |
| <a href="#">KLLA0D03190g</a> | highly similar to splP06245 Saccharomyces cerevisiae YPL201 TPK2 cAMP-dependent protein kinase catalytic chain, start by similarity                     |
| <a href="#">DEHA0D19833g</a> | similar to CA5851 CaKIN2 Candida albicans CaKIN2, hypothetical start                                                                                    |
| <a href="#">KLLA0D14905g</a> | gil28565036 gblAAO32601.1 Kluyveromyces lactis DBF2, start by similarity                                                                                |
| <a href="#">KLLA0C18568g</a> | gil6967028 emblCAB72435.1 Kluyveromyces lactis MUP1 protein, hypothetical start                                                                         |
| <a href="#">CAGL0M13541g</a> | similar to splQ03533 Saccharomyces cerevisiae YMR291w, hypothetical start                                                                               |
| <a href="#">KLLA0E03487g</a> | similar to sgd S0002874 Saccharomyces cerevisiae YDR466w, start by similarity                                                                           |
| <a href="#">DEHA0C08635g</a> | similar to splP22204 Saccharomyces cerevisiae YGR092w DBF2, hypothetical start, sequence gap                                                            |
| <a href="#">CAGL0G02607g</a> | similar to splP40494 Saccharomyces cerevisiae YIL095w PRK1, start by similarity                                                                         |
| <a href="#">CAGL0K11275g</a> | similar to trlQ03785 Saccharomyces cerevisiae YDR247w, hypothetical start                                                                               |
| <a href="#">DEHA0E05753g</a> | similar to CA0719 IPF9779.5 Candida albicans IPF9779.5 serine/threonine protein kinase 5-prime end, hypothetical start                                  |
| <a href="#">YALI0B05588g</a> | some similarities with splQ1223 Saccharomyces cerevisiae YOL101 PKH2 related to ser/thr protein kinase P108.1.f16.1, hypothetical start                 |
| <a href="#">DEHA0A08822g</a> | similar to CA0577 IPF16051 Candida albicans IPF16051 unknown function, start by similarity                                                              |
| <a href="#">KLLA0C17160g</a> | similar to splP53104 Saccharomyces cerevisiae YGL180w APG1 essential for autophagocytosis, start by similarity                                          |
| <a href="#">KLLA0A02717g</a> | some similarities with splP5323 Saccharomyces cerevisiae YGR051 hypothetical start                                                                      |
| <a href="#">YALI0C21758g</a> | similar to KLLA-IPF4914.1 Kluyveromyces lactis IPF 4914, hypothetical start                                                                             |
| <a href="#">CAGL0C03509g</a> | similar to splP53739 Saccharomyces cerevisiae YNR047w or splP2533 Saccharomyces cerevisiae YCR091 KIN82, hypothetical start                             |
|                              | similar to splP11792 Saccharomyces cerevisiae YHR205w SCH9                                                                                              |

|                              |                                                                                                                                        |
|------------------------------|----------------------------------------------------------------------------------------------------------------------------------------|
| <a href="#">KLLA0B03586g</a> | serine/threonine protein kinase involved in stress response and nutrient-sensing signaling pathway, start by similarity                |
| <a href="#">YALI0C15444g</a> | similar to trlQ12706 Schizosaccharomyces pombe Prob serine/threonine protein kinase PS (EC 2.7.1.-), hypothetical start                |
| <a href="#">YALIOE34067g</a> | weakly similar to DEHA-IPF394 Debaryomyces hansenii IPF 394 hypothetical start                                                         |
| <a href="#">CAGL0C05005g</a> | similar to splP27636 Saccharomyces cerevisiae YAR019c CDC15, hypothetical start                                                        |
| <a href="#">DEHA0B04895g</a> | similar to CA2018CaSTE11 Candida albicans CaSTE11 ser/thr protein kinase of the MEKK family, hypothetical start                        |
| <a href="#">KLLA0B12716g</a> | similar to splP12688 Saccharomyces cerevisiae YKL126w YPK1 ser/thr specific protein kinase, start by similarity                        |
| <a href="#">CAGL0F03707g</a> | similar to splQ08732 Saccharomyces cerevisiae YOR267c, start by similarity                                                             |
| <a href="#">YALIOE22858g</a> | Weakly similar to CAAL-CA55 CaAKL1 serine/threonine protein kinase (by homology), Hypothetical start                                   |
| <a href="#">KLLA0F09031g</a> | similar to splP43565 Saccharomyces cerevisiae YFL033c RIM15 protein kinase involved in expression of meiotic genes, hypothetical start |
| <a href="#">DEHA0E12782g</a> | similar to splP38070 Saccharomyces cerevisiae YBR028c, putative ribosomal protein kinase                                               |
| <a href="#">CAGL0B01925g</a> | similar to splP13185 Saccharomyces cerevisiae YDR122w KIN1 or splP13186 Saccharomyces cerevisiae YLR090w KIN2, hypothetical start      |
| <a href="#">KLLA0C07535g</a> | some similarities with sgdS00057 Saccharomyces cerevisiae YOR267c, hypothetical start                                                  |
| <a href="#">CAGL0D02244g</a> | similar to splP24719 Saccharomyces cerevisiae YOR351c MEK1 ser/thr protein kinase, hypothetical start                                  |
| <a href="#">DEHA0C13387g</a> | similar to trlQ08732 Saccharomyces cerevisiae YOR267C, hypothetical start                                                              |
| <a href="#">YALIOE17743g</a> | no similarity, hypothetical start                                                                                                      |
| <a href="#">CAGL0C02893g</a> | similar to trlQ08732 Saccharomyces cerevisiae YOR267c, hypothetical start                                                              |
| <a href="#">KLLA0F19536g</a> | similar to splP13186 Saccharomyces cerevisiae YLR096w KIN2 ser/thr protein kinase, start by similarity                                 |
| <a href="#">CAGL0M11396g</a> | similar to splP13186 Saccharomyces cerevisiae YLR096w KIN2 ser/thr protein kinase, hypothetical start                                  |
| <a href="#">YALIOB13178g</a> | similar to splP32490 Saccharomyces cerevisiae YOR231w MKK1 ser/thr protein kinase, start by similarity                                 |
| <a href="#">DEHA0F27489g</a> | similar to CA1288CaKSP1 Candida albicans CaKSP1 serine/threonine protein kinase (by homology), start by similarity                     |
| <a href="#">KLLA0B02332g</a> | similar to splP38991 Saccharomyces cerevisiae YPL209c IPL1 ser/thr protein kinase, start by similarity                                 |
| <a href="#">CAGL0L07326g</a> | similar to splP39009 Saccharomyces cerevisiae YDL101c DUN1 protein kinase, start by similarity                                         |
| <a href="#">KLLA0F11143g</a> | similar to splP22216 Saccharomyces cerevisiae YPL153c SPK1 ser/thr protein kinase, start by similarity                                 |
| <a href="#">DEHA0E14641g</a> | similar to CA4097CaGIN4 Candida albicans CaGIN4 ser/thr protein kinase (by homology), hypothetical start                               |
|                              | similar to splQ01919 Saccharomyces cerevisiae YOR233w KIN4 ser/thr                                                                     |

|                              |                                                                                                                                                                                                    |
|------------------------------|----------------------------------------------------------------------------------------------------------------------------------------------------------------------------------------------------|
| <a href="#">CAGL0J03872g</a> | protein kinase or trlQ03002<br>Saccharomyces cerevisiae YPL14<br>start by similarity                                                                                                               |
| <a href="#">YALI0D14542g</a> | similar to splP11792 Saccharomy<br>cerevisiae YHR205w SCH9<br>serine/threonine protein kinase invo<br>in stress response and nutrient-sen<br>signaling pathway, start by simila                    |
| <a href="#">KLLA0B06501g</a> | some similarities with splP4711<br>Saccharomyces cerevisiae YJR05<br>PTK2 involved in polyamine upta<br>hypothetical start                                                                         |
| <a href="#">DEHA0C05742g</a> | some similarities with splP4189<br>Schizosaccharomyces pombe Ce<br>division control protein 7 and<br>CA2669 IPF17494.3eoc Candid<br>albicans and CA2404 CaCDC15 Ca<br>albicans, hypothetical start |
| <a href="#">DEHA0F20878g</a> | similar to CA0044 IPF17347 Cand<br>albicans IPF17347, hypothetical s                                                                                                                               |
| <a href="#">KLLA0E08371g</a> | similar to splP40494 Saccharomy<br>cerevisiae YIL095w PRK1<br>serine/threonine protein kinase invo<br>in regulation of actin cytoskelet<br>organization, start by similarity                       |
| <a href="#">KLLA0F13552g</a> | gil33386566 emb CAD87727.1<br>Kluyveromyces lactis protein kin<br>start by similarity                                                                                                              |
| <a href="#">CAGL0J11638g</a> | highly similar to splP32562<br>Saccharomyces cerevisiae YMR0<br>CDC5 involved in regulation of D<br>replication, hypothetical start                                                                |
| <a href="#">CAGL0K02167g</a> | similar to splP38990 Saccharomy<br>cerevisiae YER129w Serine/threon<br>protein kinase, start by similarit                                                                                          |
| <a href="#">DEHA0F09493g</a> | similar to ca CA2909 IPF11424 Car<br>albicans IPF11424 unknown funct<br>hypothetical start                                                                                                         |
| <a href="#">CAGL0G05720g</a> | similar to splP22211 Saccharomy<br>cerevisiae YNL183c NPR1 ser/t<br>protein kinase, start by similarit                                                                                             |
| <a href="#">DEHA0C09823g</a> | similar to CA1205 CaSSK2 Cand<br>albicans, hypothetical start                                                                                                                                      |
| <a href="#">YALI0D22770g</a> | Similar to CAAL-CA5851 CaKI<br>ser/thr protein kinase (by homology)<br>start                                                                                                                       |
| <a href="#">CAGL0M08910g</a> | highly similar to splQ00372<br>Saccharomyces cerevisiae YDR47<br>carbon catabolite derepressing ser<br>protein kinase, hypothetical star                                                           |
| <a href="#">KLLA0C04191g</a> | weakly similar to splP27636<br>Saccharomyces cerevisiae YAR0<br>CDC15 protein kinase of the M<br>kinase kinase kinase family, hypo<br>start                                                        |
| <a href="#">DEHA0B16071g</a> | similar to splP22209 Saccharomy<br>cerevisiae YAR018c KIN3 ser/thr p<br>kinase, start by similarity                                                                                                |
| <a href="#">CAGL0K03399g</a> | highly similar to splP12688<br>Saccharomyces cerevisiae YKL12<br>Serine/threonine-protein kinase, sta<br>similarity                                                                                |
| <a href="#">CAGL0J04972g</a> | some similarities with trlQ1210<br>Saccharomyces cerevisiae YDL02<br>hypothetical start                                                                                                            |
| <a href="#">DEHA0F10923g</a> | highly similar to ca CA2986 CaCD<br>Candida albicans CaCDC5 Cell-c<br>protein kinase (by homology), star<br>similarity                                                                             |
| <a href="#">YALI0B04840g</a> | similar to trlQ12003 Saccharomy<br>cerevisiae YPL236c, start by simil                                                                                                                              |
| <a href="#">KLLA0C01650g</a> | similar to splQ12263 Saccharomy<br>cerevisiae YDR507c GIN4 ser/thr p<br>kinase, start by similarity                                                                                                |

|                              |                                                                                                                                                                                                       |
|------------------------------|-------------------------------------------------------------------------------------------------------------------------------------------------------------------------------------------------------|
| <a href="#">YALI0F08165g</a> | some similarities with splP4189 Schizosaccharomyces pombe 7 C OR SPBC21.06C gene Cell division control protein, start by similarity                                                                   |
| <a href="#">KLLA0E01584g</a> | highly similar to splP39009 Saccharomyces cerevisiae YDL10 DUN1 protein kinase, start by similarity                                                                                                   |
| <a href="#">DEHA0C02882g</a> | similar to CA4039 CaSKS1 Candida albicans, start by similarity                                                                                                                                        |
| <a href="#">KLLA0F01276g</a> | similar to splP38147 Saccharomyces cerevisiae YBR274w CHK1 regulatory inhibitory Cdk phosphorylation of F start by similarity                                                                         |
| <a href="#">CAGL0G09020g</a> | highly similar to splP06245 Saccharomyces cerevisiae YPL20 TPK2 cAMP-dependent protein kinase catalytic chain, hypothetical start                                                                     |
| <a href="#">DEHA0G16302g</a> | similar to trlQ12706 Schizosaccharomyces pombe Prob serine/threonine protein kinase PS start by similarity                                                                                            |
| <a href="#">CAGL0I06248g</a> | similar to splP38970 Saccharomyces cerevisiae YJL165c HAL5 ser/thr protein kinase, start by similarity                                                                                                |
| <a href="#">YALI0B08558g</a> | weakly similar to trlQ00863 Nectohaematococca Ran1-like protein kinase hypothetical start                                                                                                             |
| <a href="#">DEHA0G05544g</a> | similar to CA1375 IPF7158 Candida albicans IPF7158 putative serine/threonine kinase, hypothetical start                                                                                               |
| <a href="#">KLLA0B13607g</a> | weakly similar to splQ03497 Saccharomyces cerevisiae YHL0 STE20 ser/thr protein kinase of t pheromone pathway, hypothetical start                                                                     |
| <a href="#">YALI0F27159g</a> | some similarities with splP4704 Saccharomyces cerevisiae YJL057c probable serine/threonine-protein kinase hypothetical start                                                                          |
| <a href="#">CAGL0I05390g</a> | similar to splQ12505 Saccharomyces cerevisiae YPL026c SKS1 suppressor kinase of SNF3 or trlQ03785 Saccharomyces cerevisiae YDR24 start by similarity                                                  |
| <a href="#">YALI0E31361g</a> | similar to trlQ9HF33 Arthrobotrydactyloides Calmodulin-binding protein kinase, hypothetical start                                                                                                     |
| <a href="#">YALI0B14201g</a> | similar to splP32328 Saccharomyces cerevisiae YPR111w DBF2 cell cycle protein kinase P108.1.f3.6 or splP2 Saccharomyces cerevisiae YGR09 DBF2 ser/thr protein kinase P108.1.f16.1, hypothetical start |
| <a href="#">DEHA0C16181g</a> | similar to CA1447 CaNRK1 Candida albicans, hypothetical start                                                                                                                                         |
| <a href="#">CAGL0K04301g</a> | similar to splP53233 Saccharomyces cerevisiae YGR052w, hypothetical start                                                                                                                             |
| <a href="#">KLLA0A06820g</a> | some similarities with splP38970 Saccharomyces cerevisiae YJL16 HAL5 ser/thr protein kinase, hypothetical start                                                                                       |
| <a href="#">KLLA0C00979g</a> | similar to splP08458 Saccharomyces cerevisiae YDR523c SPS1 ser/thr protein kinase, hypothetical start                                                                                                 |
| <a href="#">YALI0D02101g</a> | similar to splO94168 Candida tropicalis Carbon catabolite derepressing protein kinase (EC 2.7.1.-), hypothetical start                                                                                |
| <a href="#">YALI0C08305g</a> | highly similar to splP06245 Saccharomyces cerevisiae YPL20 TPK2 cAMP-dependent protein kinase catalytic chain, hypothetical start                                                                     |
| <a href="#">KLLA0D12100g</a> | some similarities with sgdS00020 Saccharomyces cerevisiae YDR24 hypothetical start                                                                                                                    |
|                              | highly similar to splP53599                                                                                                                                                                           |

|                              |                                                                                                                                                      |
|------------------------------|------------------------------------------------------------------------------------------------------------------------------------------------------|
| <a href="#">CAGL0M10791g</a> | Saccharomyces cerevisiae YNR031c SSK2 MAP kinase, no start, frame                                                                                    |
| <a href="#">YALI0A05247g</a> | similar to trlQ876Z5 Neurospora crassa OS-4 Putative SSK22 like MAPK kinase, hypothetical start                                                      |
| <a href="#">DEHA0F24684g</a> | similar to splP24719 Saccharomyces cerevisiae YOR351c MEK1 ser/thr protein kinase                                                                    |
| <a href="#">KLLA0B13112g</a> | similar to splP23561 Saccharomyces cerevisiae YLR362w STE11 ser/thr protein kinase of the MEKK family by similarity                                  |
| <a href="#">CAGL0F03311g</a> | similar to splP38691 Saccharomyces cerevisiae YHR082c KSP1 ser/thr protein kinase, start by similarity                                               |
| <a href="#">KLLA0C03938g</a> | some similarities with sgdS00021 Saccharomyces cerevisiae YDL021c hypothetical start                                                                 |
| <a href="#">CAGL0M08360g</a> | some similarities with splP38971 Saccharomyces cerevisiae YJL161c ser/thr protein kinase, hypothetical start                                         |
| <a href="#">YALI0E34375g</a> | similar to wilNCU00108.1 Neurospora crassa NCU00108.1 hypothetical protein (93222 - 91750), hypothetical start                                       |
| <a href="#">KLLA0B07579g</a> | weakly similar to splP32944 Saccharomyces cerevisiae YJL181c SWE1 ser/tyr dual-specificity protein kinase, start by similarity                       |
| <a href="#">YALI0D25388g</a> | similar to trlQ8TFN2 Pichia angusta Serine-threonine kinase Pdd7p hypothetical start                                                                 |
| <a href="#">DEHA0C04840g</a> | some similarities with splP38991 Saccharomyces cerevisiae YPL201c IPL1 ser/thr protein kinase, hypothetical start                                    |
| <a href="#">YALI0B00880g</a> | similar to splP22211 Saccharomyces cerevisiae YNL183c NPR1 ser/thr protein kinase, hypothetical start                                                |
| <a href="#">YALI0D08822g</a> | some similarities with splP38991 Saccharomyces cerevisiae YER121c PAK1 DNA polymerase alpha suppressing protein kinase, hypothetical start           |
| <a href="#">DEHA0G22440g</a> | similar to CA4770IIPF9382.3 Candida albicans IPF9382.3, hypothetical start                                                                           |
| <a href="#">KLLA0C08525g</a> | similar to splP53599 Saccharomyces cerevisiae YNR031c SSK2 MAP kinase kinase of the high osmolarity signal transduction pathway, start by similarity |
| <a href="#">YALI0F09746g</a> | similar to splP24583 Saccharomyces cerevisiae YBL105c PKC1 ser/thr protein kinase, start by similarity                                               |
| <a href="#">DEHA0D07601g</a> | similar to Candida albicans CA421c start by similarity                                                                                               |
| <a href="#">CAGL0I07513g</a> | similar to splQ12236 Saccharomyces cerevisiae YOL100w PKH2, start by similarity                                                                      |
| <a href="#">DEHA0D11242g</a> | highly similar to CA5299IIPF2190 Candida albicans IPF2190, start by similarity                                                                       |
| <a href="#">DEHA0F26994g</a> | similar to CA0206IIPF14089 Candida albicans IPF14089 putative serine/threonine protein kinase, hypothetical start                                    |
| <a href="#">CAGL0M09361g</a> | highly similar to splP24583 Saccharomyces cerevisiae YBL105c PKC1 ser/thr protein kinase, start by similarity                                        |
| <a href="#">YALI0E06501g</a> | similar to splP12688 Saccharomyces cerevisiae YKL126w YPK1 ser/thr specific protein kinase, hypothetical start                                       |
| <a href="#">CAGL0K05709g</a> | similar to splQ12263 Saccharomyces cerevisiae YDR507c GIN4, start                                                                                    |



|                              |                                                                                                                                                                  |
|------------------------------|------------------------------------------------------------------------------------------------------------------------------------------------------------------|
| <a href="#">DEHA0E22110g</a> | Mitogen-activated protein kinase H identified start                                                                                                              |
| <a href="#">DEHA0A14080g</a> | highly similar to CA6039 CaCKA Candida albicans CaCKA1 casein kinase II, catalytic alpha chain, start by similarity                                              |
| <a href="#">YALI0E33803g</a> | similar to trlQ9Y7V6 Emericella nidulans MAP protein kinase MPK1 hypothetical start                                                                              |
| <a href="#">YALI0E25135g</a> | highly similar to splP32485 Saccharomyces cerevisiae YLR110c HOG1 ser/thr protein kinase of MAPK family, hypothetical start                                      |
| <a href="#">YALI0E23496g</a> | highly similar to trlQ9UW09 Glomus lagenarium Mitogen activated protein kinase, hypothetical start                                                               |
| <a href="#">CAGL0L06820g</a> | highly similar to splP38615 Saccharomyces cerevisiae YMR132c MDS1 Serine/threonine-protein kinase, hypothetical start                                            |
| <a href="#">CAGL0G02035g</a> | highly similar to splP19454 Saccharomyces cerevisiae YOR066c CKA2 casein kinase II alpha chain, start by similarity                                              |
| <a href="#">DEHA0G02750g</a> | similar to CA4014 CaCTK1 Candida albicans CaCTK1 probable cell division protein kinase, start by similarity                                                      |
| <a href="#">YALI0B02816g</a> | similar to splQ00772 Saccharomyces cerevisiae Mitogen-activated protein kinase SLT2/MPK1 (EC 2.7.1.-) (non-kinase MPK1), start by similarity                     |
| <a href="#">KLLA0D11814g</a> | similar to splP39073 Saccharomyces cerevisiae YPL042c SSN3 cyclin dependent CTD kinase, start by similarity                                                      |
| <a href="#">KLLA0B11902g</a> | gil7385125 gblAAF61706.1 AF2267 Kluveromyces lactis MAP kinase, start by similarity                                                                              |
| <a href="#">CAGL0D02002g</a> | similar to splQ03957 Saccharomyces cerevisiae YKL139w CTK1 carboxyl terminal domain kinase, hypothetical start                                                   |
| <a href="#">KLLA0F02838g</a> | some similarities with splP3258 Saccharomyces cerevisiae YJL100c IME2 ser/thr protein kinase, hypothetical start                                                 |
| <a href="#">KLLA0D10527g</a> | similar to splP23293 Saccharomyces cerevisiae YPR161c SGV1 ser/thr protein kinase, hypothetical start                                                            |
| <a href="#">CAGL0D01694g</a> | similar to splP41808 Saccharomyces cerevisiae YPR054w SMK1 sporulation specific MAP kinase, hypothetical start                                                   |
| <a href="#">YALI0D04334g</a> | similar to splP06242 Saccharomyces cerevisiae YDL108w KIN28 cyclin dependent ser/thr protein kinase, start by similarity                                         |
| <a href="#">CAGL0I08349g</a> | similar to splP23293 Saccharomyces cerevisiae YPR161c SGV1 ser/thr protein kinase, hypothetical start                                                            |
| <a href="#">CAGL0K01815g</a> | similar to splP06243 Saccharomyces cerevisiae YDL017w Cell division control protein 7, hypothetical start                                                        |
| <a href="#">DEHA0F09713g</a> | similar to calCA1467 IPF5082 Candida albicans IPF5082 similar to Saccharomyces cerevisiae Cak1p cell activating protein kinase (by homology), hypothetical start |
| <a href="#">KLLA0D11990g</a> | gil2499590 splQ92241 PH85_KLUVEROMYCES Kluveromyces lactis NEGATIVE REGULATOR OF THE PHO SYSTEM, hypothetical start                                              |
| <a href="#">YALI0D04114g</a> | weakly similar to trlQ8X0V5 Neurospora crassa Related to putative dual specificity protein kinase pom1, hypothetical start                                       |
| <a href="#">CAGL0K04169g</a> | similar to splP14681 Saccharomyces cerevisiae YGR040w KSS1, start                                                                                                |





|                              |                                                                                                                                                                                      |
|------------------------------|--------------------------------------------------------------------------------------------------------------------------------------------------------------------------------------|
| <a href="#">KLLA0F08877g</a> | gil27526975lembCAD36965.1<br>Kluyveromyces lactis cyclin-depen<br>kinase activating kinase 1, start b<br>similarity                                                                  |
| <a href="#">DEHA0E05819g</a> | highly similar to CA2027iCaMC1<br>Candida albicans CaMCK1 ser/thr<br>protein kinase, hypothetical star                                                                               |
| <a href="#">DEHA0C07469g</a> | highly similar to splP19454<br>Saccharomyces cerevisiae YOR06<br>CKA2, hypothetical start                                                                                            |
| <a href="#">YALI0E11077g</a> | similar to splQ07538<br>Schizosaccharomyces pombe<br>SPCC777.14 PRP4 Serine/threoni<br>protein kinase, hypothetical star                                                             |
| <a href="#">DEHA0E19217g</a> | similar to splQ00772 Saccharomy<br>cerevisiae YHR030c SLT2 ser/thr p<br>kinase of MAP kinase family<br>P108.1.f12.1 Length = 484, start<br>similarity                                |
| <a href="#">KLLA0F17006g</a> | gil3127831lembCAA61157.1<br>Kluyveromyces lactis protein kin<br>start by similarity                                                                                                  |
| <a href="#">KLLA0E10527g</a> | similar to splP16892 Saccharomy<br>cerevisiae YBL016w FUS3 mitog<br>activated protein kinase (MAP kin<br>start by similarity                                                         |
| <a href="#">YALI0D19492g</a> | similar to wilNCU07880.1 Neurosp<br>crassa NCU07880.1 hypothetical pr<br>(15912 - 17477), hypothetical sta                                                                           |
| <a href="#">YALI0B10758g</a> | highly similar to splP43063 Cand<br>albicans cell division control protei<br>hypothetical start                                                                                      |
| <a href="#">DEHA0F09735g</a> | similar to calCA1468iCaSRB10 Ca<br>albicans CaSRB10 cyclin-depend<br>kinase by homology, 3 end, hypothe<br>start                                                                     |
| <a href="#">DEHA0F09647g</a> | similar to wilNCU04185.1 Neurosp<br>crassa NCU04185.1 hypothetical pr<br>(AL451015) probable glycog<br>synthase kinase 3 alpha [Neurosp<br>crassa] (47604 - 49112), hypothe<br>start |
| <a href="#">DEHA0G11660g</a> | highly similar to splP43063 Cand<br>albicans Cell division control prote<br>(EC 2.7.1.-), hypothetical start                                                                         |
| <a href="#">DEHA0D14256g</a> | highly similar to CA4448iCaPHO<br>Candida albicans CaPHO85 Nega<br>regulator of PHO system, start b<br>similarity                                                                    |
| <a href="#">YALI0C10967g</a> | similar to splP39073 Saccharomy<br>cerevisiae YPL042c SSN3 cyclin<br>dependent CTD kinase, hypothetical                                                                              |
| <a href="#">CAGL0K12496g</a> | similar to splP43568 Saccharomy<br>cerevisiae YFL029c CAK1 cdk<br>activating protein kinase, hypothet<br>start                                                                       |
| <a href="#">CAGL0L12650g</a> | similar to splP39073 Saccharomy<br>cerevisiae YPL042c cyclin-depen<br>CTD kinase, hypothetical start                                                                                 |
| <a href="#">CAGL0G04455g</a> | similar to splP32581 Saccharomy<br>cerevisiae YJL106w IME2 ser/thr p<br>kinase, hypothetical start                                                                                   |
| <a href="#">KLLA0E04136g</a> | similar to splP15790 Saccharomy<br>cerevisiae YIL035c CKA1 casein k<br>II, catalytic alpha chain, start b<br>similarity                                                              |
| <a href="#">CAGL0H07535g</a> | highly similar to splP00546<br>Saccharomyces cerevisiae YBR16<br>CDC28, start by similarity                                                                                          |
| <a href="#">CAGL0I05192g</a> | highly similar to splP15790<br>Saccharomyces cerevisiae YIL03<br>CKA1 casein kinase II, start by simi                                                                                |
| <a href="#">DEHA0E04290g</a> | highly similar to CA0722iCaERK<br>Candida albicans CaERK1 mitog<br>activated protein kinase (FUS3                                                                                    |

|                                |                        |                                                                                                               |        |     |     |     |     |     |       |              |  |                          |                              |                                                                                                                                                      |  |  |  |  |                                                                                                                  |
|--------------------------------|------------------------|---------------------------------------------------------------------------------------------------------------|--------|-----|-----|-----|-----|-----|-------|--------------|--|--------------------------|------------------------------|------------------------------------------------------------------------------------------------------------------------------------------------------|--|--|--|--|------------------------------------------------------------------------------------------------------------------|
|                                |                        |                                                                                                               |        |     |     |     |     |     |       |              |  |                          |                              |                                                                                                                                                      |  |  |  |  | homolog), hypothetical start                                                                                     |
|                                |                        |                                                                                                               |        |     |     |     |     |     |       |              |  |                          |                              |                                                                                                                                                      |  |  |  |  | weakly similar to splP43568 Saccharomyces cerevisiae YFL02 CAK1 cdk-activating protein kinase hypothetical start |
| <a href="#">CTK3 (YML112W)</a> | <a href="#">2.7.1-</a> | splP46963 Saccharomyces cerevisiae YML112w CTK3 carboxy-terminal domain (CTD) kinase, gamma subunit singleton | viable | 0.9 | 0.6 | ND  | Non | ND  | sck-- | 1 1 1 0<br>0 |  | <a href="#">GLR.1303</a> | <a href="#">CAGL0J06754g</a> | similar to splP46963 Saccharomyces cerevisiae YML112w CTK3 carboxy-terminal domain kinase, start by similarity                                       |  |  |  |  |                                                                                                                  |
|                                |                        |                                                                                                               |        |     |     |     |     |     |       |              |  |                          | <a href="#">KLLA0D01815g</a> | weakly similar to splP46963 Saccharomyces cerevisiae YML112w CTK3 carboxy-terminal domain (CTD) kinase, gamma subunit singleton, start by similarity |  |  |  |  |                                                                                                                  |
|                                |                        |                                                                                                               |        |     |     |     |     |     |       |              |  |                          | <a href="#">KLLA0D11044g</a> | gil730472 splP40230 RAG8_KLU Kluyveromyces lactis CASEIN KINASE I HOMOLOG RAG8, start by similarity                                                  |  |  |  |  |                                                                                                                  |
|                                |                        |                                                                                                               |        |     |     |     |     |     |       |              |  |                          | <a href="#">YALI0E26609g</a> | similar to tr CAD79679 Neurospora crassa, start by similarity                                                                                        |  |  |  |  |                                                                                                                  |
|                                |                        |                                                                                                               |        |     |     |     |     |     |       |              |  |                          | <a href="#">DEHA0A09933g</a> | similar to splP23292 Saccharomyces cerevisiae YNL154c YCK2 casein kinase I isoform, hypothetical start                                               |  |  |  |  |                                                                                                                  |
|                                |                        |                                                                                                               |        |     |     |     |     |     |       |              |  |                          | <a href="#">CAGL0G06138g</a> | similar to splP23291 Saccharomyces cerevisiae YHR135c YCK1, start by similarity                                                                      |  |  |  |  |                                                                                                                  |
|                                |                        |                                                                                                               |        |     |     |     |     |     |       |              |  |                          | <a href="#">DEHA0D04466g</a> | similar to YALI-IPF3384.1 Yarrowia lipolytica, start by similarity                                                                                   |  |  |  |  |                                                                                                                  |
| <a href="#">YCK2 (YNL154C)</a> | <a href="#">2.7.1-</a> | splP23292 Saccharomyces cerevisiae YNL154c YCK2 casein kinase I isoform P108.1.f4.1                           | viable | Ess | Ess | Ess | 0.1 | Ess | sckdy | 4 4 2 2<br>2 |  | <a href="#">GLC.92</a>   | <a href="#">YALI0F08305g</a> | similar to splP29295 Saccharomyces cerevisiae YPL204w HRR25 casein kinase I, start by similarity                                                     |  |  |  |  |                                                                                                                  |
|                                |                        |                                                                                                               |        |     |     |     |     |     |       |              |  |                          | <a href="#">CAGL0H03553g</a> | highly similar to splP29295 Saccharomyces cerevisiae YPL204w HRR25, start by similarity                                                              |  |  |  |  |                                                                                                                  |
|                                |                        |                                                                                                               |        |     |     |     |     |     |       |              |  |                          | <a href="#">CAGL0J05940g</a> | similar to splP23291 Saccharomyces cerevisiae YHR135c YCK1 or splP23292 Saccharomyces cerevisiae YNL154c YCK2, hypothetical start                    |  |  |  |  |                                                                                                                  |
|                                |                        |                                                                                                               |        |     |     |     |     |     |       |              |  |                          | <a href="#">CAGL0K02299g</a> | similar to splP39962 Saccharomyces cerevisiae YER123w Casein kinase I isoform 3, hypothetical start                                                  |  |  |  |  |                                                                                                                  |
|                                |                        |                                                                                                               |        |     |     |     |     |     |       |              |  |                          | <a href="#">KLLA0E13563g</a> | some similarities with splP39962 Saccharomyces cerevisiae YER123w YCK3 casein kinase, isoform 3, hypothetical start                                  |  |  |  |  |                                                                                                                  |
|                                |                        |                                                                                                               |        |     |     |     |     |     |       |              |  |                          | <a href="#">KLLA0F11319g</a> | similar to sgd S0006071 Saccharomyces cerevisiae YPL150w, start by similarity                                                                        |  |  |  |  |                                                                                                                  |
|                                |                        |                                                                                                               |        |     |     |     |     |     |       |              |  |                          | <a href="#">CAGL0L07810g</a> | similar to splP25333 Saccharomyces cerevisiae YCR008w SAT4 serine/threonine-specific protein kinase, start by similarity                             |  |  |  |  |                                                                                                                  |
|                                |                        |                                                                                                               |        |     |     |     |     |     |       |              |  |                          | <a href="#">CAGL0K11550g</a> | similar to splP28708 Saccharomyces cerevisiae YKL116c, hypothetical start                                                                            |  |  |  |  |                                                                                                                  |
|                                |                        |                                                                                                               |        |     |     |     |     |     |       |              |  |                          | <a href="#">YALI0F11385g</a> | weakly similar to SPIP38691 Saccharomyces cerevisiae YHR082c KSP1 ser/thr protein kinase and DEHA0F5974.1, start by similarity                       |  |  |  |  |                                                                                                                  |
|                                |                        |                                                                                                               |        |     |     |     |     |     |       |              |  |                          | <a href="#">KLLA0A09713g</a> | similar to splQ03533 Saccharomyces cerevisiae YMR291w, start by similarity                                                                           |  |  |  |  |                                                                                                                  |
|                                |                        |                                                                                                               |        |     |     |     |     |     |       |              |  |                          | <a href="#">KLLA0E17127g</a> | similar to splP38691 Saccharomyces cerevisiae YHR082c KSP1 ser/thr protein kinase, start by similarity                                               |  |  |  |  |                                                                                                                  |
|                                |                        |                                                                                                               |        |     |     |     |     |     |       |              |  |                          | <a href="#">YALI0C04158g</a> | similar to splP18961 Saccharomyces cerevisiae Serine/threonine-protein kinase YPK2/YKR2, hypothetical start                                          |  |  |  |  |                                                                                                                  |
|                                |                        |                                                                                                               |        |     |     |     |     |     |       |              |  |                          | <a href="#">DEHA0F24676g</a> | similar to splP24719 Saccharomyces cerevisiae YOR351c MEK1 ser/thr protein kinase                                                                    |  |  |  |  |                                                                                                                  |
|                                |                        |                                                                                                               |        |     |     |     |     |     |       |              |  |                          | <a href="#">DEHA0G14817g</a> | similar to CA2643 CaHSL1 Candida albicans CaHSL1, hypothetical start                                                                                 |  |  |  |  |                                                                                                                  |
|                                |                        |                                                                                                               |        |     |     |     |     |     |       |              |  |                          | <a href="#">DEHA0C18150g</a> | similar to splP40494 Saccharomyces cerevisiae YIL095w PRK1 serine/threonine protein kinase, start by similarity                                      |  |  |  |  |                                                                                                                  |

|                              |                                                                                                                                                                 |
|------------------------------|-----------------------------------------------------------------------------------------------------------------------------------------------------------------|
| <a href="#">CAGL0K10604g</a> | similar to splP27466 Saccharomyces cerevisiae YFR014c CMK1 Ca <sup>2+</sup> /calmodulin-dependent ser/thr protein kinase type I, hypothetical start             |
| <a href="#">DEHA0C08591g</a> | similar to splP22204 Saccharomyces cerevisiae YGR092w DBF2, hypothetical start, sequence gap                                                                    |
| <a href="#">YALI0F13629g</a> | some similarities with splP2356 Saccharomyces cerevisiae YLR366c STE11 ser/thr protein kinase of the MEKK family, hypothetical start                            |
| <a href="#">KLLA0C06138g</a> | similar to splP32562 Saccharomyces cerevisiae YMR001c CDC5 involved in regulation of DNA replication, start by similarity                                       |
| <a href="#">YALI0F16159g</a> | some similarities with wiNCU009 Neurospora crassa NCU00914, hypothetical protein, hypothetical start                                                            |
| <a href="#">CAGL0K08514g</a> | similar to splP34244 Saccharomyces cerevisiae YKL101w serine/threonine protein kinase, hypothetical start                                                       |
| <a href="#">DEHA0F25278g</a> | similar to calCA1881CaRCK2 Candida albicans CaRCK2 Ca/calmodulin-dependent ser/thr protein kinase (by homology), hypothetical start                             |
| <a href="#">KLLA0F26983g</a> | some similarities with splP3280 Saccharomyces cerevisiae YKL041c ELM1 ser/thr-specific protein kinase, hypothetical start                                       |
| <a href="#">DEHA0C11484g</a> | similar to splP22211 Saccharomyces cerevisiae YNL183c NPR1 or trlQ11 Saccharomyces cerevisiae YDL021c, hypothetical start                                       |
| <a href="#">YALI0C00891g</a> | similar to splO14019 Schizosaccharomyces pombe Proboscidea serine/threonine-protein kinase C29A4.16 (EC 2.7.1.-), hypothetical start                            |
| <a href="#">KLLA0F23507g</a> | similar to splP24719 Saccharomyces cerevisiae YOR351c MEK1 ser/thr protein kinase, start by similarity                                                          |
| <a href="#">CAGL0F03245g</a> | similar to splP32361 Saccharomyces cerevisiae YHR079c IRE1, hypothetical start                                                                                  |
| <a href="#">CAGL0K11990g</a> | some similarities with splP3808 Saccharomyces cerevisiae YBR051c AKL1 Ark-family Kinase-Like protein, hypothetical start                                        |
| <a href="#">DEHA0G10417g</a> | similar to CA19711CaPKH2 Candida albicans CaPKH2 Ser/Thr protein kinase (by homology), hypothetical start                                                       |
| <a href="#">YALI0B17556g</a> | weakly similar to trlQ9Y898 Emergomyces nidulans Calcium/calmodulin dependent protein kinase C, hypothetical start                                              |
| <a href="#">CAGL0G03047g</a> | highly similar to splP22204 Saccharomyces cerevisiae YGR092w DBF2 ser/thrprotein kinase or splP32562 Saccharomyces cerevisiae YPR111c DBF20, hypothetical start |
| <a href="#">YALI0F27093g</a> | weakly similar to DEHA-IPF372 Debaryomyces hansenii, hypothetical start                                                                                         |
| <a href="#">DEHA0C14091g</a> | similar to splP37292 Saccharomyces cerevisiae YBR263w SHM1, hypothetical start                                                                                  |
| <a href="#">DEHA0C18601g</a> | similar to CA44331CaBCK1 Candida albicans, hypothetical start                                                                                                   |
| <a href="#">KLLA0C04213g</a> | similar to splP22209 Saccharomyces cerevisiae YAR018c KIN3 ser/thr protein kinase, hypothetical start                                                           |
| <a href="#">YALI0A04697g</a> | similar to splO42626 Neurospora crassa Serine/threonine-protein kinase nr001 (Nonrepressible conidiation protein), hypothetical start                           |
|                              | similar to splP32562 Saccharomyces cerevisiae YPR111c DBF20, hypothetical start                                                                                 |

|                              |                                                                                                                                                                                                                          |
|------------------------------|--------------------------------------------------------------------------------------------------------------------------------------------------------------------------------------------------------------------------|
| <a href="#">YALI0D26015g</a> | cerevisiae Cell cycle protein kinase CDC5/MSD2 (EC 2.7.1.-), hypothetical start                                                                                                                                          |
| <a href="#">DEHA0G14839g</a> | highly similar to sCA3870CaYP Candida albicans CaYPK1, start similarity                                                                                                                                                  |
| <a href="#">KLLA0C14278g</a> | similar to splP28708 Saccharomyces cerevisiae YKL116c, hypothetical                                                                                                                                                      |
| <a href="#">YALI0E13750g</a> | similar to trlCAD79666 Neurospora crassa BID14.230 Related to serine/threonine-protein kinase a DEHA-IPF6149.1 Debaryomyces hansenii, no start                                                                           |
| <a href="#">CAGL0B04147g</a> | highly similar to splP22204 Saccharomyces cerevisiae YGR09 DBF2 ser/thrprotein kinase related DBF20P or splP32328 Saccharomyces cerevisiae YPR111w DBF20 cell cycle protein kinase related to DBF20P, hypothetical start |
| <a href="#">DEHA0F13497g</a> | similar to calCA1299CaPTK2 Candida albicans CaPTK2 serine /threonine protein kinase involved in polyamine uptake (by homology), hypothetical                                                                             |
| <a href="#">DEHA0D13684g</a> | similar to CA4865IPF4085 Candida albicans IPF4085, start by similarity                                                                                                                                                   |
| <a href="#">CAGL0L06006g</a> | similar to splP53104 Saccharomyces cerevisiae YGL180w APG1 essential for autophagocytosis, hypothetical start                                                                                                            |
| <a href="#">CAGL0E05720g</a> | similar to splP38991 Saccharomyces cerevisiae YPL209c IPL1 ser/thr protein kinase, start by similarity                                                                                                                   |
| <a href="#">KLLA0F18612g</a> | some similarities with splP3808 Saccharomyces cerevisiae YBR05 AKL1 Ark-family Kinase-Like protein, hypothetical start                                                                                                   |
| <a href="#">YALI0E24563g</a> | similar to trlQ12152 Saccharomyces cerevisiae YPL150w, hypothetical                                                                                                                                                      |
| <a href="#">DEHA0F24013g</a> | similar to calCA5226CaRIM15 Candida albicans CaRIM15 Protein kinase involved in the RIM pathway (by homology), hypothetical start                                                                                        |
| <a href="#">CAGL0I04422g</a> | some similarities with splP2220 Saccharomyces cerevisiae YAR0 KIN3 ser/thr protein kinase, hypothetical start                                                                                                            |
| <a href="#">CAGL0K01661g</a> | some similarities with trlQ1210 Saccharomyces cerevisiae YDL02, hypothetical start                                                                                                                                       |
| <a href="#">DEHA0E15741g</a> | highly similar to CA3361CaSNF1 Candida albicans CaSNF1 serine/threonine protein kinase, hypothetical start                                                                                                               |
| <a href="#">CAGL0M02233g</a> | highly similar to splP22216 Saccharomyces cerevisiae YPL15 SPK1 ser/thr/tyr protein kinase, hypothetical start                                                                                                           |
| <a href="#">CAGL0F04741g</a> | similar to splP22517 Saccharomyces cerevisiae YOL016c CMK2 Ca <sup>2+</sup> /calmodulin-dependent ser/thr protein kinase, type II, hypothetical                                                                          |
| <a href="#">YALI0E06523g</a> | weakly similar to splP34244 Saccharomyces cerevisiae YKL10 HSL1 ser/thr protein kinase, coupled septin ring assembly to cell cycle progression, hypothetical start                                                       |
| <a href="#">KLLA0E11979g</a> | some similarities with splP25333 Saccharomyces cerevisiae YCR00 SAT4 serine/threonine-specific protein kinase, hypothetical start                                                                                        |
| <a href="#">CAGL0J11308g</a> | similar to splP22211 Saccharomyces cerevisiae YNL183c NPR1 ser/thr protein kinase, hypothetical start                                                                                                                    |
|                              | similar to splP25333 Saccharomyces cerevisiae YCR00 SAT4                                                                                                                                                                 |

|                              |                                                                                                                                                                                                                      |
|------------------------------|----------------------------------------------------------------------------------------------------------------------------------------------------------------------------------------------------------------------|
| <a href="#">DEHA0G11638g</a> | <i>Saccharomyces cerevisiae</i> YLR006w SAI4 serine/threonine-specific protein kinase, hypothetical start                                                                                                            |
| <a href="#">CAGL0H10208g</a> | similar to splP38080 <i>Saccharomyces cerevisiae</i> YBR059c AKL1 Ark-fam Kinase-Like protein, hypothetical start                                                                                                    |
| <a href="#">CAGL0B02739g</a> | similar to splP23561 <i>Saccharomyces cerevisiae</i> YLR362w STE11 ser/thr protein kinase of the MEKK family, hypothetical start                                                                                     |
| <a href="#">YALI0D07150g</a> | weakly similar to trIQ9C2E8 <i>Neurospora crassa</i> Conserved hypothetical protein, start by similarity                                                                                                             |
| <a href="#">DEHA0F10197g</a> | highly similar to calCA22651 <i>Candida albicans</i> CaCMK2 CaMKK2 /calmodulin-dependent ser/thr protein kinase, type II (by homology), hypothetical start                                                           |
| <a href="#">DEHA0B12628g</a> | similar to splP06245 <i>Saccharomyces cerevisiae</i> YPL203w TPK2 cAMP-dependent protein kinase 2, catalytic chain, start by similarity                                                                              |
| <a href="#">DEHA0E13574g</a> | similar to CA21931IPF14273 <i>Candida albicans</i> IPF14273 Probable ser/thr protein kinase                                                                                                                          |
| <a href="#">KLLA0D07348g</a> | weakly similar to sgdIS000606 <i>Saccharomyces cerevisiae</i> YPL141w start by similarity                                                                                                                            |
| <a href="#">DEHA0B12650g</a> | some similarities with splP3897 <i>Saccharomyces cerevisiae</i> YJL164c HAL5 ser/thr protein kinase, hypothetical start                                                                                              |
| <a href="#">DEHA0F04114g</a> | similar to CA05761 <i>Candida albicans</i> CaNPR1, hypothetical start                                                                                                                                                |
| <a href="#">DEHA0C13211g</a> | similar to splP22216 <i>Saccharomyces cerevisiae</i> YPL153c SPK1, hypothetical start                                                                                                                                |
| <a href="#">KLLA0B07205g</a> | some similarities with splP0598 <i>Saccharomyces cerevisiae</i> YKL101c TPK3 cAMP-dependent protein kinase catalytic chain, hypothetical start                                                                       |
| <a href="#">CAGL0K06479g</a> | some similarities with trIQ0330 <i>Saccharomyces cerevisiae</i> YDR461w start by similarity                                                                                                                          |
| <a href="#">KLLA0C12485g</a> | weakly similar to splQ12236 <i>Saccharomyces cerevisiae</i> YOL101c PKH2, start by similarity                                                                                                                        |
| <a href="#">KLLA0E06413g</a> | gi22858696 gb AA05732.1 <i>Kluyveromyces lactis</i> protein kinase, start by similarity                                                                                                                              |
| <a href="#">YALI0D26213g</a> | weakly similar to trIQ96WJ8 <i>Blumifera graminis</i> Protein kinase C-like protein, hypothetical start                                                                                                              |
| <a href="#">DEHA0G14707g</a> | similar to CA61351 <i>Candida albicans</i> CaCMK1, hypothetical start                                                                                                                                                |
| <a href="#">DEHA0E16115g</a> | similar to CA50741IPF3607 <i>Candida albicans</i> IPF3607 putative serine/threonine protein kinase, hypothetical start                                                                                               |
| <a href="#">CAGL0M13167g</a> | similar to splP32801 <i>Saccharomyces cerevisiae</i> YKL048c ELM1 ser/thr specific protein kinase, hypothetical start                                                                                                |
| <a href="#">KLLA0F01408g</a> | weakly similar to sgdIS000218 <i>Saccharomyces cerevisiae</i> YDL021w hypothetical start                                                                                                                             |
| <a href="#">DEHA0F25212g</a> | highly similar to trIQ9HEW0 <i>Candida albicans</i> cAMP-dependent protein kinase catalytic subunit, hypothetical start                                                                                              |
| <a href="#">CAGL0M08404g</a> | some similarities with splP0598 <i>Saccharomyces cerevisiae</i> YKL101c TPK3 or splP06244 <i>Saccharomyces cerevisiae</i> YJL164c SRA3 or splP06244 <i>Saccharomyces cerevisiae</i> YPL203w TPK2, hypothetical start |

|                              |                                                                                                                                                                               |
|------------------------------|-------------------------------------------------------------------------------------------------------------------------------------------------------------------------------|
| <a href="#">KLLA0A03806g</a> | gil2181934lemb CAA61235.1<br>Kluyveromyces lactis putative kinase<br>start by similarity                                                                                      |
| <a href="#">YALI0D19470g</a> | similar to trlQ871H9 Neurospora crassa<br>B16M17.090 Related to Ste20-like<br>kinase Don3, hypothetical start                                                                 |
| <a href="#">YALI0A10230g</a> | similar to splP22211 Saccharomyces<br>cerevisiae YNL183c NPR1 ser/thr<br>protein kinase, start by similarity                                                                  |
| <a href="#">DEHA0F10461g</a> | some similarities with<br>calCA1288 CaKSP1 Candida albicans<br>CaKSP1 SERINE/THREONINE<br>PROTEIN KINASE by homology<br>hypothetical start                                    |
| <a href="#">YALI0F01716g</a> | trlQ9P860 Yarrowia lipolytica Wee1<br>protein, mitosis inhibitor protein kinase<br>hypothetical start                                                                         |
| <a href="#">YALI0E27632g</a> | trlO93955 Yarrowia lipolytica SSF1<br>protein, multicopy suppressor of SSB1<br>secretory defects, putative calmodulin<br>dependent ser/thr protein kinase<br>identified start |
| <a href="#">CAGL0I09504g</a> | similar to splP38147 Saccharomyces<br>cerevisiae YBR274w CHK1 regulin<br>inhibitory Cdk phosphorylation of F<br>start by similarity                                           |
| <a href="#">CAGL0F09075g</a> | similar to splP11792 Saccharomyces<br>cerevisiae YHR205w SCH9<br>serine/threonine protein kinase, start<br>similarity                                                         |
| <a href="#">DEHA0C17996g</a> | similar to CA2348 IPF12811 Candida<br>albicans, putative serine/threonine<br>kinase, hypothetical start                                                                       |
| <a href="#">CAGL0H00979g</a> | similar to trlQ12003 Saccharomyces<br>cerevisiae YPL236c, hypothetical start                                                                                                  |
| <a href="#">KLLA0C03828g</a> | similar to splP54199 Saccharomyces<br>cerevisiae YDL028c MPS1<br>serine/threonine/tyrosine protein kinase<br>hypothetical start                                               |
| <a href="#">KLLA0F14190g</a> | gil3021329lemb CAA06336.1<br>Kluyveromyces lactis MAP kinase kinase<br>kinase, start by similarity                                                                            |
| <a href="#">CAGL0M10153g</a> | some similarities with splQ0349<br>Saccharomyces cerevisiae YHL006<br>ser/thr protein kinase of the pheromone<br>pathway, hypothetical start                                  |
| <a href="#">KLLA0F24618g</a> | similar to splP38070 Saccharomyces<br>cerevisiae YBR028c, start by similarity                                                                                                 |
| <a href="#">CAGL0K07458g</a> | similar to splP12688 Saccharomyces<br>cerevisiae YKL126w or splP189<br>Saccharomyces cerevisiae YMR10<br>ser/thr-specific protein kinases, start<br>similarity                |
| <a href="#">KLLA0D03190g</a> | highly similar to splP06245<br>Saccharomyces cerevisiae YPL20<br>TPK2 cAMP-dependent protein kinase<br>catalytic chain, start by similarity                                   |
| <a href="#">DEHA0D19833g</a> | similar to CA5851 CaKIN2 Candida<br>albicans CaKIN2, hypothetical start                                                                                                       |
| <a href="#">KLLA0D14905g</a> | gil28565036 gblAAO32601.1<br>Kluyveromyces lactis DBF2, start<br>similarity                                                                                                   |
| <a href="#">KLLA0C18568g</a> | gil6967028lemb CAB72435.1<br>Kluyveromyces lactis MUP1 protein<br>hypothetical start                                                                                          |
| <a href="#">CAGL0M13541g</a> | similar to splQ03533 Saccharomyces<br>cerevisiae YMR291w, hypothetical start                                                                                                  |
| <a href="#">KLLA0E03487g</a> | similar to sgd S0002874 Saccharomyces<br>cerevisiae YDR466w, start by similarity                                                                                              |
| <a href="#">DEHA0C08635g</a> | similar to splP22204 Saccharomyces<br>cerevisiae YGR092w DBF2,<br>hypothetical start, sequence gap                                                                            |
| <a href="#">CAGL0G02607g</a> | similar to splP40494 Saccharomyces<br>cerevisiae YIL095w PRK1, start                                                                                                          |



|                              |                                                                                                                                                                                              |
|------------------------------|----------------------------------------------------------------------------------------------------------------------------------------------------------------------------------------------|
| <a href="#">CAGL0C02893g</a> | similar to trlQ08732 Saccharomyces cerevisiae YOR267c, hypothetical                                                                                                                          |
| <a href="#">KLLA0F19536g</a> | similar to splP13186 Saccharomyces cerevisiae YLR096w KIN2 ser/thr protein kinase, start by similarity                                                                                       |
| <a href="#">CAGL0M11396g</a> | similar to splP13186 Saccharomyces cerevisiae YLR096w KIN2 ser/thr protein kinase, hypothetical start                                                                                        |
| <a href="#">YALI0B13178g</a> | similar to splP32490 Saccharomyces cerevisiae YOR231w MKK1 ser/thr protein kinase, start by similarity                                                                                       |
| <a href="#">DEHA0F27489g</a> | similar to CA1288 CaKSP1 Candida albicans CaKSP1 serine/threonine protein kinase (by homology), start by similarity                                                                          |
| <a href="#">KLLA0B02332g</a> | similar to splP38991 Saccharomyces cerevisiae YPL209c IPL1 ser/thr protein kinase, start by similarity                                                                                       |
| <a href="#">CAGL0L07326g</a> | similar to splP39009 Saccharomyces cerevisiae YDL101c DUN1 protein kinase, start by similarity                                                                                               |
| <a href="#">KLLA0F11143g</a> | similar to splP22216 Saccharomyces cerevisiae YPL153c SPK1 ser/thr protein kinase, start by similarity                                                                                       |
| <a href="#">DEHA0E14641g</a> | similar to CA4097 CaGIN4 Candida albicans CaGIN4 ser/thr protein kinase (by homology), hypothetical start                                                                                    |
| <a href="#">CAGL0J03872g</a> | similar to splQ01919 Saccharomyces cerevisiae YOR233w KIN4 ser/thr protein kinase or trlQ03002 Saccharomyces cerevisiae YPL14 start by similarity                                            |
| <a href="#">YALI0D14542g</a> | similar to splP11792 Saccharomyces cerevisiae YHR205w SCH9 serine/threonine protein kinase involved in stress response and nutrient-sensing signaling pathway, start by similarity           |
| <a href="#">KLLA0B06501g</a> | some similarities with splP4711 Saccharomyces cerevisiae YJR05 PTK2 involved in polyamine uptake, hypothetical start                                                                         |
| <a href="#">DEHA0C05742g</a> | some similarities with splP4189 Schizosaccharomyces pombe Cdc25 division control protein 7 and CA2669 IPF17494.3eoc Candida albicans and CA2404 CaCDC15 Candida albicans, hypothetical start |
| <a href="#">DEHA0F20878g</a> | similar to CA0044 IPF17347 Candida albicans IPF17347, hypothetical start                                                                                                                     |
| <a href="#">KLLA0E08371g</a> | similar to splP40494 Saccharomyces cerevisiae YIL095w PRK1 serine/threonine protein kinase involved in regulation of actin cytoskeleton organization, start by similarity                    |
| <a href="#">KLLA0F13552g</a> | gil33386566 lemb CAD87727.1 Kluyveromyces lactis protein kinase, start by similarity                                                                                                         |
| <a href="#">CAGL0J11638g</a> | highly similar to splP32562 Saccharomyces cerevisiae YMR0 CDC5 involved in regulation of DNA replication, hypothetical start                                                                 |
| <a href="#">CAGL0K02167g</a> | similar to splP38990 Saccharomyces cerevisiae YER129w Serine/threonine protein kinase, start by similarity                                                                                   |
| <a href="#">DEHA0F09493g</a> | similar to calCA2909 IPF11424 Candida albicans IPF11424 unknown function, hypothetical start                                                                                                 |
| <a href="#">CAGL0G05720g</a> | similar to splP22211 Saccharomyces cerevisiae YNL183c NPR1 ser/thr protein kinase, start by similarity                                                                                       |
| <a href="#">DEHA0C09823g</a> | similar to CA1205 CaSSK2 Candida albicans, hypothetical start                                                                                                                                |
| <a href="#">YALI0D22770g</a> | Similar to CAAL-CA5851 Candida albicans ser/thr protein kinase (by homology)                                                                                                                 |



|                              | start                                                                                                                                                   |
|------------------------------|---------------------------------------------------------------------------------------------------------------------------------------------------------|
| <a href="#">CAGL0M08910g</a> | highly similar to splQ00372 Saccharomyces cerevisiae YDR47 carbon catabolite derepressing serine/threonine protein kinase, hypothetical start           |
| <a href="#">KLLA0C04191g</a> | weakly similar to splP27636 Saccharomyces cerevisiae YAR018c CDC15 protein kinase of the MAP kinase kinase kinase family, hypothetical start            |
| <a href="#">DEHA0B16071g</a> | similar to splP22209 Saccharomyces cerevisiae YAR018c KIN3 ser/thr protein kinase, start by similarity                                                  |
| <a href="#">CAGL0K03399g</a> | highly similar to splP12688 Saccharomyces cerevisiae YKL120 Serine/threonine-protein kinase, start by similarity                                        |
| <a href="#">CAGL0J04972g</a> | some similarities with trlQ1210 Saccharomyces cerevisiae YDL026c hypothetical start                                                                     |
| <a href="#">DEHA0F10923g</a> | highly similar to calCA2986(CaCDC5) Candida albicans CaCDC5 Cell-cycle protein kinase (by homology), start by similarity                                |
| <a href="#">YALI0B04840g</a> | similar to trlQ12003 Saccharomyces cerevisiae YPL236c, start by similarity                                                                              |
| <a href="#">KLLA0C01650g</a> | similar to splQ12263 Saccharomyces cerevisiae YDR507c GIN4 ser/thr protein kinase, start by similarity                                                  |
| <a href="#">YALI0F08165g</a> | some similarities with splP4189 Schizosaccharomyces pombe 7 CLS1 OR SPBC21.06C gene Cell division control protein, start by similarity                  |
| <a href="#">KLLA0E01584g</a> | highly similar to splP39009 Saccharomyces cerevisiae YDL101c DUN1 protein kinase, start by similarity                                                   |
| <a href="#">DEHA0C02882g</a> | similar to CA4039(CaSKS1) Candida albicans, start by similarity                                                                                         |
| <a href="#">KLLA0F01276g</a> | similar to splP38147 Saccharomyces cerevisiae YBR274w CHK1 regulatory inhibitory Cdk phosphorylation of FUS1, start by similarity                       |
| <a href="#">CAGL0G09020g</a> | highly similar to splP06245 Saccharomyces cerevisiae YPL207c TPK2 cAMP-dependent protein kinase catalytic chain, hypothetical start                     |
| <a href="#">DEHA0G16302g</a> | similar to trlQ12706 Schizosaccharomyces pombe Proboscicidin serine/threonine protein kinase PSK1, start by similarity                                  |
| <a href="#">CAGL0I06248g</a> | similar to splP38970 Saccharomyces cerevisiae YJL165c HAL5 ser/thr protein kinase, start by similarity                                                  |
| <a href="#">YALI0B08558g</a> | weakly similar to trlQ00863 Necthaematococca Ran1-like protein kinase, hypothetical start                                                               |
| <a href="#">DEHA0G05544g</a> | similar to CA1375(IPF7158) Candida albicans IPF7158 putative serine/threonine kinase, hypothetical start                                                |
| <a href="#">KLLA0B13607g</a> | weakly similar to splQ03497 Saccharomyces cerevisiae YHL007c STE20 ser/thr protein kinase of the pheromone pathway, hypothetical start                  |
| <a href="#">YALI0F27159g</a> | some similarities with splP4704 Saccharomyces cerevisiae YJL057c probable serine/threonine-protein kinase, hypothetical start                           |
| <a href="#">CAGL0I05390g</a> | similar to splQ12505 Saccharomyces cerevisiae YPL026c SKS1 suppressor kinase of SNF3 or trlQ03785 Saccharomyces cerevisiae YDR247c, start by similarity |
| <a href="#">YALI0E31361g</a> | similar to trlQ9HF33 Arthrobotryopsis dactyloides Calmodulin-binding protein, start by similarity                                                       |

|                              |                                                                                                                                                                                                                                            |
|------------------------------|--------------------------------------------------------------------------------------------------------------------------------------------------------------------------------------------------------------------------------------------|
|                              | kinase, hypothetical start                                                                                                                                                                                                                 |
| <a href="#">YALI0B14201g</a> | similar to splP32328 Saccharomyces cerevisiae YPR111w DBF20 cell cycle protein kinase P108.1.f3.6 or splP2108.1.f3.6 Ser/Thr protein kinase Saccharomyces cerevisiae YGR0905w DBF2 ser/thr protein kinase P108.1.f16.1, hypothetical start |
| <a href="#">DEHA0C16181g</a> | similar to CA1447 CaNRK1 Candida albicans, hypothetical start                                                                                                                                                                              |
| <a href="#">CAGL0K04301g</a> | similar to splP53233 Saccharomyces cerevisiae YGR052w, hypothetical start                                                                                                                                                                  |
| <a href="#">KLLA0A06820g</a> | some similarities with splP3897 Saccharomyces cerevisiae YJL1616w HAL5 ser/thr protein kinase, hypothetical start                                                                                                                          |
| <a href="#">KLLA0C00979g</a> | similar to splP08458 Saccharomyces cerevisiae YDR523c SPS1 ser/thr protein kinase, hypothetical start                                                                                                                                      |
| <a href="#">YALI0D02101g</a> | similar to splO94168 Candida tropicalis Carbon catabolite derepressing protein kinase (EC 2.7.1.-), hypothetical start                                                                                                                     |
| <a href="#">YALI0C08305g</a> | highly similar to splP06245 Saccharomyces cerevisiae YPL2019w TPK2 cAMP-dependent protein kinase catalytic chain, hypothetical start                                                                                                       |
| <a href="#">KLLA0D12100g</a> | some similarities with sgdS00021 Saccharomyces cerevisiae YDR241c, hypothetical start                                                                                                                                                      |
| <a href="#">CAGL0M10791g</a> | highly similar to splP53599 Saccharomyces cerevisiae YNR010w SSK2 MAP kinase, no start, frame shift                                                                                                                                        |
| <a href="#">YALI0A05247g</a> | similar to tr Q876Z5 Neurospora crassa OS-4 Putative SSK22 like MAPK kinase, hypothetical start                                                                                                                                            |
| <a href="#">DEHA0F24684g</a> | similar to splP24719 Saccharomyces cerevisiae YOR351c MEK1 ser/thr protein kinase                                                                                                                                                          |
| <a href="#">KLLA0B13112g</a> | similar to splP23561 Saccharomyces cerevisiae YLR362w STE11 ser/thr protein kinase of the MEKK family, start by similarity                                                                                                                 |
| <a href="#">CAGL0F03311g</a> | similar to splP38691 Saccharomyces cerevisiae YHR082c KSP1 ser/thr protein kinase, start by similarity                                                                                                                                     |
| <a href="#">KLLA0C03938g</a> | some similarities with sgdS00021 Saccharomyces cerevisiae YDL021c, hypothetical start                                                                                                                                                      |
| <a href="#">CAGL0M08360g</a> | some similarities with splP3897 Saccharomyces cerevisiae YJL1616w ser/thr protein kinase, hypothetical start                                                                                                                               |
| <a href="#">YALI0E34375g</a> | similar to wilNCU00108.1 Neurospora crassa NCU00108.1 hypothetical protein (93222 - 91750), hypothetical start                                                                                                                             |
| <a href="#">KLLA0B07579g</a> | weakly similar to splP32944 Saccharomyces cerevisiae YJL1818w SWE1 ser/tyr dual-specificity protein kinase, start by similarity                                                                                                            |
| <a href="#">YALI0D25388g</a> | similar to tr Q8TFN2 Pichia angusta Serine-threonine kinase Pdd7p, hypothetical start                                                                                                                                                      |
| <a href="#">DEHA0C04840g</a> | some similarities with splP3899 Saccharomyces cerevisiae YPL2019w IPL1 ser/thr protein kinase, hypothetical start                                                                                                                          |
| <a href="#">YALI0B00880g</a> | similar to splP22211 Saccharomyces cerevisiae YNL183c NPR1 ser/thr protein kinase, hypothetical start                                                                                                                                      |
| <a href="#">YALI0D08822g</a> | some similarities with splP3899 Saccharomyces cerevisiae YER121c PAK1 DNA polymerase alpha suppressing protein kinase, hypothetical start                                                                                                  |
| <a href="#">DEHA0G22440g</a> | similar to CA4770 IPF9382.3 Candida albicans IPF9382.3, hypothetical start                                                                                                                                                                 |



|                              |                                                                                                                                                      |
|------------------------------|------------------------------------------------------------------------------------------------------------------------------------------------------|
| <a href="#">DEHA0B08701g</a> | albicans CaYAK1 putative Ser/thr protein kinase, hypothetical start                                                                                  |
| <a href="#">CAGL0I00539g</a> | highly similar to splQ00772 Saccharomyces cerevisiae YHR033C SLT2, hypothetical start                                                                |
| <a href="#">KLLA0E12177g</a> | gi4096112 gb AAC99804.1 Kluveromyces lactis CTD kinase large subunit, hypothetical start                                                             |
| <a href="#">DEHA0B00770g</a> | similar to splP32581 Saccharomyces cerevisiae YJL106w IME2 ser/thr protein kinase, hypothetical start                                                |
| <a href="#">YALI0D25190g</a> | highly similar to splP17157 Saccharomyces cerevisiae YPL033C PHO85, hypothetical start                                                               |
| <a href="#">DEHA0E21219g</a> | similar to CA1378 CaERK2 Candida albicans CaERK2 mitogen-activated protein kinase, start by similarity                                               |
| <a href="#">DEHA0F08987g</a> | similar to CAGL-IPF1383.1 Candida glabrata, hypothetical start                                                                                       |
| <a href="#">CAGL0I05896g</a> | some similarities with splP1468 Saccharomyces cerevisiae YJL1468C YAK1 ser/thr protein kinase, hypothetical start                                    |
| <a href="#">KLLA0F20053g</a> | highly similar to splP32485 Saccharomyces cerevisiae YLR110C HOG1 ser/thr protein kinase of MAPK family, start by similarity                         |
| <a href="#">DEHA0E22110g</a> | splQ9UV50 Debaryomyces hansenii Mitogen-activated protein kinase HOG1 identified start                                                               |
| <a href="#">DEHA0A14080g</a> | highly similar to CA6039 CaCKA1 Candida albicans CaCKA1 casein kinase II, catalytic alpha chain, start by similarity                                 |
| <a href="#">YALI0E33803g</a> | similar to tr Q9Y7V6 Emericella nidulans MAP protein kinase MPK1, hypothetical start                                                                 |
| <a href="#">YALI0E25135g</a> | highly similar to splP32485 Saccharomyces cerevisiae YLR110C HOG1 ser/thr protein kinase of MAPK family, hypothetical start                          |
| <a href="#">YALI0E23496g</a> | highly similar to tr Q9UW09 Glomus lagenerium Mitogen activated protein kinase, hypothetical start                                                   |
| <a href="#">CAGL0L06820g</a> | highly similar to splP38615 Saccharomyces cerevisiae YMR13C MDS1 Serine/threonine-protein kinase, hypothetical start                                 |
| <a href="#">CAGL0G02035g</a> | highly similar to splP19454 Saccharomyces cerevisiae YOR063C CKA2 casein kinase II alpha chain, start by similarity                                  |
| <a href="#">DEHA0G02750g</a> | similar to CA4014 CaCTK1 Candida albicans CaCTK1 probable cell division protein kinase, start by similarity                                          |
| <a href="#">YALI0B02816g</a> | similar to splQ00772 Saccharomyces cerevisiae Mitogen-activated protein kinase SLT2/MPK1 (EC 2.7.1.-) (MAPK family kinase MPK1), start by similarity |
| <a href="#">KLLA0D11814g</a> | similar to splP39073 Saccharomyces cerevisiae YPL042c SSN3 cyclin-dependent CTD kinase, start by similarity                                          |
| <a href="#">KLLA0B11902g</a> | gi7385125 gb AAF61706.1 AF2267 Kluveromyces lactis MAP kinase, start by similarity                                                                   |
| <a href="#">CAGL0D02002g</a> | similar to splQ03957 Saccharomyces cerevisiae YKL139w CTK1 carboxyl terminal domain kinase, hypothetical start                                       |
| <a href="#">KLLA0F02838g</a> | some similarities with splP32581 Saccharomyces cerevisiae YJL106w IME2 ser/thr protein kinase, hypothetical start                                    |
|                              | similar to splP23293 Saccharomyces cerevisiae YJL106w IME2 ser/thr protein kinase, hypothetical start                                                |

|                                |                         |                                                                                         |                                                                |     |     |     |     |     |       |          |                              |                                                                                                                                                                    |
|--------------------------------|-------------------------|-----------------------------------------------------------------------------------------|----------------------------------------------------------------|-----|-----|-----|-----|-----|-------|----------|------------------------------|--------------------------------------------------------------------------------------------------------------------------------------------------------------------|
|                                |                         |                                                                                         |                                                                |     |     |     |     |     |       |          | <a href="#">KLLA0D10527g</a> | cerevisiae YPR161c SGV1 ser/thr protein kinase, hypothetical start                                                                                                 |
|                                |                         |                                                                                         |                                                                |     |     |     |     |     |       |          | <a href="#">CAGL0D01694g</a> | similar to splP41808 Saccharomyces cerevisiae YPR054w SMK1 sporulation specific MAP kinase, hypothetical start                                                     |
|                                |                         |                                                                                         |                                                                |     |     |     |     |     |       |          | <a href="#">YALI0D04334g</a> | similar to splP06242 Saccharomyces cerevisiae YDL108w KIN28 cyclin dependent ser/thr protein kinase, start by similarity                                           |
|                                |                         |                                                                                         |                                                                |     |     |     |     |     |       |          | <a href="#">CAGL0I08349g</a> | similar to splP23293 Saccharomyces cerevisiae YPR161c SGV1 ser/thr protein kinase, hypothetical start                                                              |
|                                |                         |                                                                                         |                                                                |     |     |     |     |     |       |          | <a href="#">CAGL0K01815g</a> | similar to splP06243 Saccharomyces cerevisiae YDL017w Cell division control protein 7, hypothetical start                                                          |
|                                |                         |                                                                                         |                                                                |     |     |     |     |     |       |          | <a href="#">DEHA0F09713g</a> | similar to calCA1467IPF5082 Candida albicans IPF5082 similar to Saccharomyces cerevisiae Cak1p cyclin activating protein kinase (by homology), hypothetical start  |
|                                |                         |                                                                                         |                                                                |     |     |     |     |     |       |          | <a href="#">KLLA0D11990g</a> | gil2499590 splQ92241 PH85_KLUYVEROMYCES LACTIS NEGATIVE REGULATOR OF THE PHO SYSTEM, hypothetical start                                                            |
|                                |                         |                                                                                         |                                                                |     |     |     |     |     |       |          | <a href="#">YALI0D04114g</a> | weakly similar to trlQ8X0V5 Neurospora crassa Related to putative dual specificity protein kinase pom1, hypothetical start                                         |
|                                |                         |                                                                                         |                                                                |     |     |     |     |     |       |          | <a href="#">CAGL0K04169g</a> | similar to splP14681 Saccharomyces cerevisiae YGR040w KSS1, start by similarity                                                                                    |
|                                |                         |                                                                                         |                                                                |     |     |     |     |     |       |          | <a href="#">KLLA0E07414g</a> | highly similar to splP21965 Saccharomyces cerevisiae YNL307c MCK1 ser/thr/tyr protein kinase, start by similarity                                                  |
|                                |                         |                                                                                         |                                                                |     |     |     |     |     |       |          | <a href="#">YALI0B18700g</a> | similar to trlQ8TG13 Neurospora crassa Casein kinase II alpha subunit CKA2, start by similarity                                                                    |
|                                |                         |                                                                                         |                                                                |     |     |     |     |     |       |          | <a href="#">YALI0D16863g</a> | trlQ92390 Yarrowia lipolytica casein kinase II catalytic subunit, identified by similarity                                                                         |
|                                |                         |                                                                                         |                                                                |     |     |     |     |     |       |          | <a href="#">KLLA0C04345g</a> | similar to splP06243 Saccharomyces cerevisiae YDL017w CDC7 protein kinase, start by similarity                                                                     |
|                                |                         |                                                                                         |                                                                |     |     |     |     |     |       |          | <a href="#">CAGL0H10318g</a> | highly similar to splP06242 Saccharomyces cerevisiae YDL108w KIN28 cyclin-dependent ser/thr protein kinase                                                         |
| <a href="#">MCK1 (YNL307C)</a> | <a href="#">2.7.1.-</a> | splP21965 Saccharomyces cerevisiae YNL307c MCK1 ser/thr/tyr protein kinase P108.1.f12.1 | Exhibits sensitivity at 20 generations when grown in 1 M NaCl. | 0.1 | Ess | Ess | Ess | Ess | scddy | 22 19 17 | <a href="#">YALI0B22528g</a> | weakly similar to trlO14098 Schizosaccharomyces pombe Putative serine/threonine protein kinase, start by similarity                                                |
|                                |                         |                                                                                         |                                                                |     |     |     |     |     |       |          | <a href="#">DEHA0G22528g</a> | highly similar to CA3004CaKIN1 Candida albicans CaKIN28, start by similarity                                                                                       |
|                                |                         |                                                                                         |                                                                |     |     |     |     |     |       |          | <a href="#">KLLA0B11946g</a> | similar to splP41808 Saccharomyces cerevisiae YPR054w SMK1 sporulation specific MAP kinase, start by similarity                                                    |
|                                |                         |                                                                                         |                                                                |     |     |     |     |     |       |          | <a href="#">DEHA0F26268g</a> | similar to splP41808 Saccharomyces cerevisiae YPR054w Sporulation specific mitogen-activated protein kinase SMK1 (MAP kinase SMK1), hypothetical start, frameshift |
|                                |                         |                                                                                         |                                                                |     |     |     |     |     |       |          | <a href="#">KLLA0B09790g</a> | highly similar to splP00546 Saccharomyces cerevisiae YBR161w CDC28 cyclin-dependent protein kinase, start by similarity                                            |
|                                |                         |                                                                                         |                                                                |     |     |     |     |     |       |          | <a href="#">DEHA0F26257g</a> | similar to splP41808 Saccharomyces cerevisiae YPR054w Sporulation specific mitogen-activated protein kinase SMK1 (MAP kinase SMK1), hypothetical start, frameshift |
|                                |                         |                                                                                         |                                                                |     |     |     |     |     |       |          | <a href="#">YALI0F03113g</a> | some similarities with splP3258 Saccharomyces cerevisiae YJL1014w IME2 ser/thr protein kinase, hypothetical start                                                  |

|                              |                                                                                                                                                                                         |
|------------------------------|-----------------------------------------------------------------------------------------------------------------------------------------------------------------------------------------|
| <a href="#">KLLA0F16467g</a> | highly similar to splP19454 Saccharomyces cerevisiae YOR06 CKA2 casein kinase II alpha chain, start by similarity                                                                       |
| <a href="#">CAGL0L12474g</a> | highly similar to splP17157 Saccharomyces cerevisiae YPL03 cyclin-dependent protein kinase, start by similarity                                                                         |
| <a href="#">CAGL0M11748g</a> | highly similar to splP32485 Saccharomyces cerevisiae YLR11 HOG1, start by similarity                                                                                                    |
| <a href="#">CAGL0E01683g</a> | highly similar to splP21965 Saccharomyces cerevisiae YNL30 MCK1 or splQ12222 Saccharomyces cerevisiae YOL128c, start by similarity                                                      |
| <a href="#">KLLA0A02497g</a> | highly similar to splP14681 Saccharomyces cerevisiae YGR04 KSS1 ser/thr protein kinase of the MAP kinase family, start by similarity                                                    |
| <a href="#">CAGL0J04290g</a> | similar to splP16892 Saccharomyces cerevisiae YBL016w FUS3 or splP16892 Saccharomyces cerevisiae YGR04 KSS1, start by similarity                                                        |
| <a href="#">KLLA0A05819g</a> | similar to splP14680 Saccharomyces cerevisiae YJL141c YAK1 ser/thr protein kinase, start by similarity                                                                                  |
| <a href="#">YALI0D20966g</a> | highly similar to trlQ9HE92 Neurospora crassa Probable glycogen synthase kinase 3 alpha, start by similarity                                                                            |
| <a href="#">KLLA0F08877g</a> | gil27526975lemb CAD36965.1 Kluyveromyces lactis cyclin-dependent kinase activating kinase 1, start by similarity                                                                        |
| <a href="#">DEHA0E05819g</a> | highly similar to CA2027 CaMCK1 Candida albicans CaMCK1 ser/thr protein kinase, hypothetical start                                                                                      |
| <a href="#">DEHA0C07469g</a> | highly similar to splP19454 Saccharomyces cerevisiae YOR06 CKA2, hypothetical start                                                                                                     |
| <a href="#">YALIOE11077g</a> | similar to splQ07538 Schizosaccharomyces pombe SPCC777.14 PRP4 Serine/threonine protein kinase, hypothetical start                                                                      |
| <a href="#">DEHA0E19217g</a> | similar to splQ00772 Saccharomyces cerevisiae YHR030c SLT2 ser/thr protein kinase of MAP kinase family P108.1.f12.1 Length = 484, start by similarity                                   |
| <a href="#">KLLA0F17006g</a> | gil3127831lemb CAA61157.1 Kluyveromyces lactis protein kinase, start by similarity                                                                                                      |
| <a href="#">KLLA0E10527g</a> | similar to splP16892 Saccharomyces cerevisiae YBL016w FUS3 mitogen-activated protein kinase (MAP kinase), start by similarity                                                           |
| <a href="#">YALI0D19492g</a> | similar to wilNCU07880.1 Neurospora crassa NCU07880.1 hypothetical protein (15912 - 17477), hypothetical start                                                                          |
| <a href="#">YALIOB10758g</a> | highly similar to splP43063 Candida albicans cell division control protein, hypothetical start                                                                                          |
| <a href="#">DEHA0F09735g</a> | similar to calCA1468 CaSRB10 Candida albicans CaSRB10 cyclin-dependent kinase by homology, 3 end, hypothetical start                                                                    |
| <a href="#">DEHA0F09647g</a> | similar to wilNCU04185.1 Neurospora crassa NCU04185.1 hypothetical protein (AL451015) probable glycogen synthase kinase 3 alpha [Neurospora crassa] (47604 - 49112), hypothetical start |
| <a href="#">DEHA0G11660g</a> | highly similar to splP43063 Candida albicans Cell division control protein (EC 2.7.1.-), hypothetical start                                                                             |
|                              | highly similar to CA4448 CaPHO                                                                                                                                                          |

|                                |                         |                                                                                    |        |    |    |    |    |    |    |        |           |                              |                                                                                                                                                     |
|--------------------------------|-------------------------|------------------------------------------------------------------------------------|--------|----|----|----|----|----|----|--------|-----------|------------------------------|-----------------------------------------------------------------------------------------------------------------------------------------------------|
|                                |                         |                                                                                    |        |    |    |    |    |    |    |        |           | <a href="#">DEHA0D14256g</a> | Candida albicans CaPHO85 Negative regulator of PHO system, start by similarity                                                                      |
|                                |                         |                                                                                    |        |    |    |    |    |    |    |        |           | <a href="#">YALI0C10967g</a> | similar to splP39073 Saccharomyces cerevisiae YPL042c SSN3 cyclin-dependent CTD kinase, hypothetical start                                          |
|                                |                         |                                                                                    |        |    |    |    |    |    |    |        |           | <a href="#">CAGL0K12496g</a> | similar to splP43568 Saccharomyces cerevisiae YFL029c CAK1 cdk-activating protein kinase, hypothetical start                                        |
|                                |                         |                                                                                    |        |    |    |    |    |    |    |        |           | <a href="#">CAGL0L12650g</a> | similar to splP39073 Saccharomyces cerevisiae YPL042c cyclin-dependent CTD kinase, hypothetical start                                               |
|                                |                         |                                                                                    |        |    |    |    |    |    |    |        |           | <a href="#">CAGL0G04455g</a> | similar to splP32581 Saccharomyces cerevisiae YJL106w IME2 ser/thr protein kinase, hypothetical start                                               |
|                                |                         |                                                                                    |        |    |    |    |    |    |    |        |           | <a href="#">KLLA0E04136g</a> | similar to splP15790 Saccharomyces cerevisiae YIL035c CAK1 casein kinase II, catalytic alpha chain, start by similarity                             |
|                                |                         |                                                                                    |        |    |    |    |    |    |    |        |           | <a href="#">CAGL0H07535g</a> | highly similar to splP00546 Saccharomyces cerevisiae YBR166 CDC28, start by similarity                                                              |
|                                |                         |                                                                                    |        |    |    |    |    |    |    |        |           | <a href="#">CAGL0I05192g</a> | highly similar to splP15790 Saccharomyces cerevisiae YIL035c CAK1 casein kinase II, start by similarity                                             |
|                                |                         |                                                                                    |        |    |    |    |    |    |    |        |           | <a href="#">DEHA0E04290g</a> | highly similar to CA0722CaERK1 Candida albicans CaERK1 mitogen-activated protein kinase (FUS3 homolog), hypothetical start                          |
|                                |                         |                                                                                    |        |    |    |    |    |    |    |        |           | <a href="#">YALI0C24321g</a> | weakly similar to splP43568 Saccharomyces cerevisiae YFL029c CAK1 cdk-activating protein kinase, hypothetical start                                 |
| <a href="#">MKK1 (YOR231W)</a> | <a href="#">2.7.1.-</a> | splP32490 Saccharomyces cerevisiae YOR231w MKK1 ser/thr protein kinase P108.1.f6.1 | viable | NA | NA | NA | NA | NA | NA | seckdy | 7 5 4 4 3 | <a href="#">YALI0F21065g</a> | trIQ9Y7W8 Yarrowia lipolytica ser/thr/tyr MAP kinase kinase, no similarity                                                                          |
|                                |                         |                                                                                    |        |    |    |    |    |    |    |        |           | <a href="#">YALI0B15906g</a> | similar to splP08018 Saccharomyces cerevisiae YJL128c PBS2 tyrosine protein kinase of the MAP kinase kinase family P108.1.f2.4, start by similarity |
|                                |                         |                                                                                    |        |    |    |    |    |    |    |        |           | <a href="#">DEHA0B12672g</a> | similar to splO14427 Candida albicans Serine/threonine-protein kinase CLC1, start by similarity                                                     |
|                                |                         |                                                                                    |        |    |    |    |    |    |    |        |           | <a href="#">CAGL0M03729g</a> | similar to splP48562 Saccharomyces cerevisiae YNL298w CLA4, start by similarity                                                                     |
|                                |                         |                                                                                    |        |    |    |    |    |    |    |        |           | <a href="#">KLLA0A07403g</a> | similar to splP48562 Saccharomyces cerevisiae YNL298w CLA4 ser/thr protein kinase, start by similarity                                              |
|                                |                         |                                                                                    |        |    |    |    |    |    |    |        |           | <a href="#">CAGL0L05632g</a> | similar to splP08018 Saccharomyces cerevisiae YJL128c PBS2, hypothetical start                                                                      |
|                                |                         |                                                                                    |        |    |    |    |    |    |    |        |           | <a href="#">KLLA0E15378g</a> | some similarities with splP08018 Saccharomyces cerevisiae YJL128c PBS2 tyrosine protein kinase of the MAP kinase kinase family, hypothetical start  |
|                                |                         |                                                                                    |        |    |    |    |    |    |    |        |           | <a href="#">CAGL0I03498g</a> | similar to splP06784 Saccharomyces cerevisiae YDL159w STE7 ser/thr protein kinase of MAP kinase kinase family, hypothetical start                   |
|                                |                         |                                                                                    |        |    |    |    |    |    |    |        |           | <a href="#">CAGL0H01639g</a> | similar to splP08458 Saccharomyces cerevisiae YDR523c SPS1 ser/thr protein kinase, hypothetical start                                               |
|                                |                         |                                                                                    |        |    |    |    |    |    |    |        |           | <a href="#">YALI0D07502g</a> | weakly similar to splP08458 Saccharomyces cerevisiae YDR523c SPS1 ser/thr protein kinase, start by similarity                                       |
|                                |                         |                                                                                    |        |    |    |    |    |    |    |        |           | <a href="#">DEHA0C17204g</a> | similar to CA4577CaMKK2 Candida albicans, start by similarity                                                                                       |
|                                |                         |                                                                                    |        |    |    |    |    |    |    |        |           | <a href="#">KLLA0C16577g</a> | some similarities with splP06784 Saccharomyces cerevisiae YDL159w STE7 ser/thr/tyr protein kinase of MAP kinase kinase family, hypothetical start   |
|                                |                         |                                                                                    |        |    |    |    |    |    |    |        |           |                              | some similarities with splP32490                                                                                                                    |





|  |  |  |  |  |  |  |  |  |  |                              |                                                                                                                                                                        |
|--|--|--|--|--|--|--|--|--|--|------------------------------|------------------------------------------------------------------------------------------------------------------------------------------------------------------------|
|  |  |  |  |  |  |  |  |  |  | <a href="#">CAGL0G02035g</a> | Saccharomyces cerevisiae YOR06 CKA2 casein kinase II alpha chain, by similarity                                                                                        |
|  |  |  |  |  |  |  |  |  |  | <a href="#">DEHA0G02750g</a> | similar to CA4014 CaCTK1 Candida albicans CaCTK1 probable cell division protein kinase, start by similarity                                                            |
|  |  |  |  |  |  |  |  |  |  | <a href="#">YALI0B02816g</a> | similar to splQ00772 Saccharomyces cerevisiae Mitogen-activated protein kinase SLT2/MPK1 (EC 2.7.1.-) (MAP kinase MPK1), start by similarity                           |
|  |  |  |  |  |  |  |  |  |  | <a href="#">KLLA0D11814g</a> | similar to splP39073 Saccharomyces cerevisiae YPL042c SSN3 cyclin-dependent CTD kinase, start by similarity                                                            |
|  |  |  |  |  |  |  |  |  |  | <a href="#">KLLA0B11902g</a> | gil7385125 gblAAF61706.1 AF2267 Kluveromyces lactis MAP kinase, by similarity                                                                                          |
|  |  |  |  |  |  |  |  |  |  | <a href="#">CAGL0D02002g</a> | similar to splQ03957 Saccharomyces cerevisiae YKL139w CTK1 carboxyl terminal domain kinase, hypothetical start                                                         |
|  |  |  |  |  |  |  |  |  |  | <a href="#">KLLA0F02838g</a> | some similarities with splP3258 Saccharomyces cerevisiae YJL1014ME2 ser/thr protein kinase, hypothetical start                                                         |
|  |  |  |  |  |  |  |  |  |  | <a href="#">KLLA0D10527g</a> | similar to splP23293 Saccharomyces cerevisiae YPR161c SGV1 ser/thr protein kinase, hypothetical start                                                                  |
|  |  |  |  |  |  |  |  |  |  | <a href="#">CAGL0D01694g</a> | similar to splP41808 Saccharomyces cerevisiae YPR054w SMK1 sporulation specific MAP kinase, hypothetical start                                                         |
|  |  |  |  |  |  |  |  |  |  | <a href="#">YALI0D04334g</a> | similar to splP06242 Saccharomyces cerevisiae YDL108w KIN28 cyclin-dependent ser/thr protein kinase, start by similarity                                               |
|  |  |  |  |  |  |  |  |  |  | <a href="#">CAGL0I08349g</a> | similar to splP23293 Saccharomyces cerevisiae YPR161c SGV1 ser/thr protein kinase, hypothetical start                                                                  |
|  |  |  |  |  |  |  |  |  |  | <a href="#">CAGL0K01815g</a> | similar to splP06243 Saccharomyces cerevisiae YDL017w Cell division control protein 7, hypothetical start                                                              |
|  |  |  |  |  |  |  |  |  |  | <a href="#">DEHA0F09713g</a> | similar to calCA1467 IPF5082 Candida albicans IPF5082 similar to Saccharomyces cerevisiae Cak1p cell cycle activating protein kinase (by homology), hypothetical start |
|  |  |  |  |  |  |  |  |  |  | <a href="#">KLLA0D11990g</a> | gil2499590 splQ92241 PH85_KLUVEROMYCES LACTIS NEGATIVE REGULATOR OF THE PHO SYSTEM, hypothetical start                                                                 |
|  |  |  |  |  |  |  |  |  |  | <a href="#">YALI0D04114g</a> | weakly similar to trIQ8X0V5 Neurospora crassa Related to putative dual specificity protein kinase pom1, hypothetical start                                             |
|  |  |  |  |  |  |  |  |  |  | <a href="#">CAGL0K04169g</a> | similar to splP14681 Saccharomyces cerevisiae YGR040w KSS1, start by similarity                                                                                        |
|  |  |  |  |  |  |  |  |  |  | <a href="#">KLLA0E07414g</a> | highly similar to splP21965 Saccharomyces cerevisiae YNL307MCK1 ser/thr/tyr protein kinase, start by similarity                                                        |
|  |  |  |  |  |  |  |  |  |  | <a href="#">YALI0B18700g</a> | similar to trIQ8TG13 Neurospora crassa Casein kinase II alpha subunit CKA2, by similarity                                                                              |
|  |  |  |  |  |  |  |  |  |  | <a href="#">YALI0D16863g</a> | trIQ92390 Yarrowia lipolytica casein kinase II catalytic subunit, identified                                                                                           |
|  |  |  |  |  |  |  |  |  |  | <a href="#">KLLA0C04345g</a> | similar to splP06243 Saccharomyces cerevisiae YDL017w CDC7 protein kinase, start by similarity                                                                         |
|  |  |  |  |  |  |  |  |  |  | <a href="#">CAGL0H10318g</a> | highly similar to splP06242 Saccharomyces cerevisiae YDL101KIN28 cyclin-dependent ser/thr protein kinase                                                               |
|  |  |  |  |  |  |  |  |  |  | <a href="#">YALI0B22528g</a> | weakly similar to trIO14098 Schizosaccharomyces pombe Putative serine/threonine protein kinase, start                                                                  |

[SSN3](#)  
(YPL042C)

[2.7.1.-](#)

splP39073  
Saccharomyces  
cerevisiae YPL042c  
SSN3 cyclin

exhibits  
growth  
defect on a  
non-fermentable

NA NA NA NA NA NA

sckdy

22 19  
19 21

[GLC.8](#)





|                                 |                                                                                                                       |                                                                                                                        |          |     |     |     |     |     |       |              |                        |                              |                                                                                                                                   |                                                                                                                                                           |
|---------------------------------|-----------------------------------------------------------------------------------------------------------------------|------------------------------------------------------------------------------------------------------------------------|----------|-----|-----|-----|-----|-----|-------|--------------|------------------------|------------------------------|-----------------------------------------------------------------------------------------------------------------------------------|-----------------------------------------------------------------------------------------------------------------------------------------------------------|
| <a href="#">MKK2 (YPL140C)</a>  | <a href="#">2.7.1-</a>                                                                                                | splP32491<br>Saccharomyces cerevisiae YPL140c<br>MKK2 protein kinase of the map kinase kinase (MEK) family P108.1.f6.1 | viable   | 0.2 | Ess | Ess | Ess | Ess | Ess   | sckdy        | 7 5 4 4<br>3           | <a href="#">GLC.52</a>       | <a href="#">CAGL0L05632g</a>                                                                                                      | similar to splP08018 Saccharomyces cerevisiae YJL128c PBS2, hypothetical start                                                                            |
|                                 |                                                                                                                       |                                                                                                                        |          |     |     |     |     |     |       |              |                        |                              | <a href="#">KLLA0E15378g</a>                                                                                                      | some similarities with splP08018 Saccharomyces cerevisiae YJL128c PBS2 tyrosine protein kinase of the kinase kinase family, hypothetical                  |
|                                 |                                                                                                                       |                                                                                                                        |          |     |     |     |     |     |       |              |                        |                              | <a href="#">CAGL0I03498g</a>                                                                                                      | similar to splP06784 Saccharomyces cerevisiae YDL159w STE7 ser/thr protein kinase of MAP kinase kinase family, hypothetical start                         |
|                                 |                                                                                                                       |                                                                                                                        |          |     |     |     |     |     |       |              |                        |                              | <a href="#">CAGL0H01639g</a>                                                                                                      | similar to splP08458 Saccharomyces cerevisiae YDR523c SPS1 ser/thr protein kinase, hypothetical start                                                     |
|                                 |                                                                                                                       |                                                                                                                        |          |     |     |     |     |     |       |              |                        |                              | <a href="#">YALI0D07502g</a>                                                                                                      | weakly similar to splP08458 Saccharomyces cerevisiae YDR523c SPS1 ser/thr protein kinase, start by similarity                                             |
|                                 |                                                                                                                       |                                                                                                                        |          |     |     |     |     |     |       |              |                        |                              | <a href="#">DEHA0C17204g</a>                                                                                                      | similar to CA4577/CaMKK2 Candida albicans, start by similarity                                                                                            |
|                                 |                                                                                                                       |                                                                                                                        |          |     |     |     |     |     |       |              |                        |                              | <a href="#">KLLA0C16577g</a>                                                                                                      | some similarities with splP06784 Saccharomyces cerevisiae YDL159w STE7 ser/thr/tyr protein kinase of MAP kinase kinase family, hypothetical               |
|                                 |                                                                                                                       |                                                                                                                        |          |     |     |     |     |     |       |              |                        |                              | <a href="#">KLLA0D07304g</a>                                                                                                      | some similarities with splP32491 Saccharomyces cerevisiae YPL140c MKK2 protein kinase of the map kinase kinase (MEK) family, hypothetical                 |
|                                 |                                                                                                                       |                                                                                                                        |          |     |     |     |     |     |       |              |                        |                              | <a href="#">CAGL0J03828g</a>                                                                                                      | similar to splP32490 Saccharomyces cerevisiae YOR231w MKK1 ser/thr protein kinase or splP32491 Saccharomyces cerevisiae YPL140c MKK2, start by similarity |
|                                 |                                                                                                                       |                                                                                                                        |          |     |     |     |     |     |       |              |                        |                              | <a href="#">DEHA0C09416g</a>                                                                                                      | similar to splP08018 Saccharomyces cerevisiae YJL128c PBS2, hypothetical start                                                                            |
| <a href="#">DEHA0F15719g</a>    | similar to calCA1623/CaSTE7 Candida albicans CaSTE7 MAP Kinase Kinase, hypothetical start                             |                                                                                                                        |          |     |     |     |     |     |       |              |                        |                              |                                                                                                                                   |                                                                                                                                                           |
| <a href="#">HRR25 (YPL204W)</a> | <a href="#">2.7.1-</a>                                                                                                | splP29295<br>Saccharomyces cerevisiae YPL204w<br>HRR25 casein kinase I, ser/thr/tyr protein kinase P108.1.f4.1         | inviable | Ess | Ess | Ess | 0.1 | Ess | sckdy | 4 4 2 2<br>2 | <a href="#">GLC.92</a> | <a href="#">KLLA0D11044g</a> | gil730472/splP40230/RAG8_KLUYVEROMYCES lactis CASEIN KINASE I HOMOLOG RAG8, start by similarity                                   |                                                                                                                                                           |
|                                 |                                                                                                                       |                                                                                                                        |          |     |     |     |     |     |       |              |                        | <a href="#">YALI0E26609g</a> | similar to trlCAD79679 Neurospora crassa, start by similarity                                                                     |                                                                                                                                                           |
|                                 |                                                                                                                       |                                                                                                                        |          |     |     |     |     |     |       |              |                        | <a href="#">DEHA0A09933g</a> | similar to splP23292 Saccharomyces cerevisiae YNL154c YCK2 casein kinase I isoform, hypothetical start                            |                                                                                                                                                           |
|                                 |                                                                                                                       |                                                                                                                        |          |     |     |     |     |     |       |              |                        | <a href="#">CAGL0G06138g</a> | similar to splP23291 Saccharomyces cerevisiae YHR135c YCK1, start by similarity                                                   |                                                                                                                                                           |
|                                 |                                                                                                                       |                                                                                                                        |          |     |     |     |     |     |       |              |                        | <a href="#">DEHA0D04466g</a> | similar to YALI-IPF3384.1 Yarrowia lipolytica, start by similarity                                                                |                                                                                                                                                           |
|                                 |                                                                                                                       |                                                                                                                        |          |     |     |     |     |     |       |              |                        | <a href="#">YALI0F08305g</a> | similar to splP29295 Saccharomyces cerevisiae YPL204w HRR25 casein kinase I, start by similarity                                  |                                                                                                                                                           |
|                                 |                                                                                                                       |                                                                                                                        |          |     |     |     |     |     |       |              |                        | <a href="#">CAGL0H03553g</a> | highly similar to splP29295 Saccharomyces cerevisiae YPL204w HRR25, start by similarity                                           |                                                                                                                                                           |
|                                 |                                                                                                                       |                                                                                                                        |          |     |     |     |     |     |       |              |                        | <a href="#">CAGL0J05940g</a> | similar to splP23291 Saccharomyces cerevisiae YHR135c YCK1 or splP23292 Saccharomyces cerevisiae YNL154c YCK2, hypothetical start |                                                                                                                                                           |
|                                 |                                                                                                                       |                                                                                                                        |          |     |     |     |     |     |       |              |                        | <a href="#">CAGL0K02299g</a> | similar to splP39962 Saccharomyces cerevisiae YER123w Casein kinase I, hypothetical start                                         |                                                                                                                                                           |
|                                 |                                                                                                                       |                                                                                                                        |          |     |     |     |     |     |       |              |                        | <a href="#">KLLA0E13563g</a> | some similarities with splP39962 Saccharomyces cerevisiae YER123w YCK3 casein kinase, isoform 3, hypothetical start               |                                                                                                                                                           |
| <a href="#">YALI0B22066g</a>    | highly similar to wilNCU01680.1 Neurospora crassa NCU01680.1 plasma membrane ATPase (proton pump), hypothetical start |                                                                                                                        |          |     |     |     |     |     |       |              |                        |                              |                                                                                                                                   |                                                                                                                                                           |
|                                 |                                                                                                                       |                                                                                                                        |          |     |     |     |     |     |       |              |                        | <a href="#">YALI0B22066g</a> | similar to splQ12691 Saccharomyces cerevisiae YER123w Casein kinase I, hypothetical start                                         |                                                                                                                                                           |

|                                |                                                                                                                      |                                                                                                       |   |    |    |    |    |    |       |           |                        |                              |                                                                                                                                                                                             |
|--------------------------------|----------------------------------------------------------------------------------------------------------------------|-------------------------------------------------------------------------------------------------------|---|----|----|----|----|----|-------|-----------|------------------------|------------------------------|---------------------------------------------------------------------------------------------------------------------------------------------------------------------------------------------|
| <a href="#">ENAS (YDR038C)</a> | <a href="#">3.6.1-</a>                                                                                               | splQ12691<br>Saccharomyces cerevisiae YDR038c<br>ENAS P-type ATPase involved in Na+ efflux P16.2.f7.1 | - | NA | NA | NA | NA | NA | sckdy | 5 4 4 4 5 | <a href="#">GLC.54</a> | <a href="#">YALI0A01023g</a> | cerevisiae YDR038c ENA5 P-type ATPase involved in Na+ efflux, start by similarity                                                                                                           |
|                                |                                                                                                                      |                                                                                                       |   |    |    |    |    |    |       |           |                        | <a href="#">DEHA0A09295g</a> | similar to splP38929 Saccharomyces cerevisiae YGL006w PMC1 Ca2+ transporting P-type ATPase, hypothetical start                                                                              |
|                                |                                                                                                                      |                                                                                                       |   |    |    |    |    |    |       |           |                        | <a href="#">CAGL0A00517g</a> | similar to splP38929 Saccharomyces cerevisiae YGL006w PMC1, hypothetical start                                                                                                              |
|                                |                                                                                                                      |                                                                                                       |   |    |    |    |    |    |       |           |                        | <a href="#">YALI0E19338g</a> | similar to trlQ96X39 Debaryomyces hansenii Plasma membrane Na+ ATPase, hypothetical start                                                                                                   |
|                                |                                                                                                                      |                                                                                                       |   |    |    |    |    |    |       |           |                        | <a href="#">YALI0E09471g</a> | splO43108 Yarrowia lipolytica Calmodulin-dependent Ca2+ transporting ATPase 1, identified start                                                                                             |
|                                |                                                                                                                      |                                                                                                       |   |    |    |    |    |    |       |           |                        | <a href="#">DEHA0G09878g</a> | trlQ96X39 Debaryomyces hansenii Plasma membrane Na+ ATPase, identified start                                                                                                                |
|                                |                                                                                                                      |                                                                                                       |   |    |    |    |    |    |       |           |                        | <a href="#">KLLA0F20658g</a> | similar to splQ12691 Saccharomyces cerevisiae YDR038c ENA5 P-type ATPase involved in Na+ efflux, start by similarity                                                                        |
|                                |                                                                                                                      |                                                                                                       |   |    |    |    |    |    |       |           |                        | <a href="#">DEHA0F14619g</a> | highly similar to trlQ9P872 Candida albicans Calcium/manganese P-type ATPase PMR1, start by similarity                                                                                      |
|                                |                                                                                                                      |                                                                                                       |   |    |    |    |    |    |       |           |                        | <a href="#">CAGL0J01870g</a> | highly similar to splP13586 Saccharomyces cerevisiae YGL1006w PMR1, hypothetical start                                                                                                      |
|                                |                                                                                                                      |                                                                                                       |   |    |    |    |    |    |       |           |                        | <a href="#">CAGL0I04312g</a> | highly similar to splP13586 Saccharomyces cerevisiae YGL1006w PMR1 Ca2+-transporting P-type ATPase, start by similarity                                                                     |
|                                |                                                                                                                      |                                                                                                       |   |    |    |    |    |    |       |           |                        | <a href="#">DEHA0C02937g</a> | trlQ9C1R0 Debaryomyces hansenii ATPase ENA1p, identified start                                                                                                                              |
|                                |                                                                                                                      |                                                                                                       |   |    |    |    |    |    |       |           |                        | <a href="#">YALI0D04873g</a> | similar to splP38929 Saccharomyces cerevisiae YGL006w PMC1 Ca2+ transporting P-type ATPase, start by similarity                                                                             |
|                                |                                                                                                                      |                                                                                                       |   |    |    |    |    |    |       |           |                        | <a href="#">KLLA0E14630g</a> | similar to splQ01896 Saccharomyces cerevisiae YDR039c ENA2 P-type ATPase involved in Na+ efflux, hypothetical start                                                                         |
|                                |                                                                                                                      |                                                                                                       |   |    |    |    |    |    |       |           |                        | <a href="#">KLLA0A03157g</a> | gil3288523lembCAA04476.1 Kluyveromyces lactis Ca++ ATPase, start by similarity                                                                                                              |
|                                |                                                                                                                      |                                                                                                       |   |    |    |    |    |    |       |           |                        | <a href="#">KLLA0A08910g</a> | similar to splP38929 Saccharomyces cerevisiae YGL006w PMC1 Ca2+ transporting P-type ATPase, start by similarity                                                                             |
|                                |                                                                                                                      |                                                                                                       |   |    |    |    |    |    |       |           |                        | <a href="#">CAGL0K12034g</a> | highly similar to splP13587 Saccharomyces cerevisiae YDR038c ENA1 or splQ01896 Saccharomyces cerevisiae YDR039c ENA2 or splQ12691 Saccharomyces cerevisiae YDR038c ENA5, hypothetical start |
|                                |                                                                                                                      |                                                                                                       |   |    |    |    |    |    |       |           |                        | <a href="#">YALI0B22066g</a> | highly similar to wilNCU01680. Neurospora crassa NCU01680.1 plasma membrane ATPase (proton pump), hypothetical start                                                                        |
| <a href="#">YALI0A01023g</a>   | similar to splQ12691 Saccharomyces cerevisiae YDR038c ENA5 P-type ATPase involved in Na+ efflux, start by similarity |                                                                                                       |   |    |    |    |    |    |       |           |                        |                              |                                                                                                                                                                                             |
| <a href="#">DEHA0A09295g</a>   | similar to splP38929 Saccharomyces cerevisiae YGL006w PMC1 Ca2+ transporting P-type ATPase, hypothetical start       |                                                                                                       |   |    |    |    |    |    |       |           |                        |                              |                                                                                                                                                                                             |
| <a href="#">CAGL0A00517g</a>   | similar to splP38929 Saccharomyces cerevisiae YGL006w PMC1, hypothetical start                                       |                                                                                                       |   |    |    |    |    |    |       |           |                        |                              |                                                                                                                                                                                             |
| <a href="#">YALI0E19338g</a>   | similar to trlQ96X39 Debaryomyces hansenii Plasma membrane Na+ ATPase, hypothetical start                            |                                                                                                       |   |    |    |    |    |    |       |           |                        |                              |                                                                                                                                                                                             |
| <a href="#">YALI0E09471g</a>   | splO43108 Yarrowia lipolytica Calmodulin-dependent Ca2+ transporting ATPase 1, identified start                      |                                                                                                       |   |    |    |    |    |    |       |           |                        |                              |                                                                                                                                                                                             |

|                                                   |                                                                                                                        |                                                                                                               |   |    |    |    |    |    |    |       |              |                        |                                                   |                                                                                                                        |
|---------------------------------------------------|------------------------------------------------------------------------------------------------------------------------|---------------------------------------------------------------------------------------------------------------|---|----|----|----|----|----|----|-------|--------------|------------------------|---------------------------------------------------|------------------------------------------------------------------------------------------------------------------------|
| <a href="#">ENAI</a><br><a href="#">(YDR040C)</a> | <a href="#">3.6.1-</a>                                                                                                 | splP13587<br>Saccharomyces cerevisiae YDR040c<br>ENA1 P-type ATPase involved in Na+ and Li+ efflux P16.2.f7.1 | - | NA | NA | NA | NA | NA | NA | sckdy | 5 4 4 4<br>5 | <a href="#">GLC.54</a> | <a href="#">YALI00241g</a>                        | transporting ATPase 1, identified start                                                                                |
|                                                   |                                                                                                                        |                                                                                                               |   |    |    |    |    |    |    |       |              |                        | <a href="#">DEHA0G09878g</a>                      | trIQ96X39 Debaryomyces hanseolae Plasma membrane Na+ ATPase identified start                                           |
|                                                   |                                                                                                                        |                                                                                                               |   |    |    |    |    |    |    |       |              |                        | <a href="#">KLLA0F20658g</a>                      | similar to splQ12691 Saccharomyces cerevisiae YDR038c ENA5 P-type ATPase involved in Na+ efflux, start by similarity   |
|                                                   |                                                                                                                        |                                                                                                               |   |    |    |    |    |    |    |       |              |                        | <a href="#">DEHA0F14619g</a>                      | highly similar to trIQ9P872 Candida albicans Calcium/manganese P-type ATPase PMR1, start by similarity                 |
|                                                   |                                                                                                                        |                                                                                                               |   |    |    |    |    |    |    |       |              |                        | <a href="#">CAGL0J01870g</a>                      | highly similar to splP13586 Saccharomyces cerevisiae YGL1016 PMR1, hypothetical start                                  |
|                                                   |                                                                                                                        |                                                                                                               |   |    |    |    |    |    |    |       |              |                        | <a href="#">CAGL0I04312g</a>                      | highly similar to splP13586 Saccharomyces cerevisiae YGL1016 PMR1 Ca2+-transporting P-type ATPase, start by similarity |
|                                                   |                                                                                                                        |                                                                                                               |   |    |    |    |    |    |    |       |              |                        | <a href="#">DEHA0C02937g</a>                      | trIQ9C1R0 Debaryomyces hanseolae ATPase ENA1p, identified start                                                        |
|                                                   |                                                                                                                        |                                                                                                               |   |    |    |    |    |    |    |       |              |                        | <a href="#">YALI0D04873g</a>                      | similar to splP38929 Saccharomyces cerevisiae YGL006w PMC1 Ca2+-transporting P-type ATPase, start by similarity        |
|                                                   |                                                                                                                        |                                                                                                               |   |    |    |    |    |    |    |       |              |                        | <a href="#">KLLA0E14630g</a>                      | similar to splQ01896 Saccharomyces cerevisiae YDR039c ENA2 P-type ATPase involved in Na+ efflux, hypothetical start    |
|                                                   |                                                                                                                        |                                                                                                               |   |    |    |    |    |    |    |       |              |                        | <a href="#">KLLA0A03157g</a>                      | gil3288523lemb/CAA04476.1 Kluyveromyces lactis Ca++ ATPase start by similarity                                         |
|                                                   |                                                                                                                        |                                                                                                               |   |    |    |    |    |    |    |       |              |                        | <a href="#">KLLA0A08910g</a>                      | similar to splP38929 Saccharomyces cerevisiae YGL006w PMC1 Ca2+-transporting P-type ATPase, start by similarity        |
|                                                   |                                                                                                                        |                                                                                                               |   |    |    |    |    |    |    |       |              |                        | <a href="#">RAD3</a><br><a href="#">(YER171W)</a> | <a href="#">3.6.1-</a>                                                                                                 |
| <a href="#">DEHA0A02519g</a>                      | similar to CA3942/CaCHL1 Candida albicans CaCHL1 protein of the DEAH box family, start by similarity                   |                                                                                                               |   |    |    |    |    |    |    |       |              |                        |                                                   |                                                                                                                        |
| <a href="#">CAGL0L11924g</a>                      | highly similar to splP06839 Saccharomyces cerevisiae YER171w RAD3 DNA helicase/ATPase, start by similarity             |                                                                                                               |   |    |    |    |    |    |    |       |              |                        |                                                   |                                                                                                                        |
| <a href="#">YALI0C23639g</a>                      | similar to splP22516 Saccharomyces cerevisiae YPL008w CHL1 protein of the DEAH box family, start by similarity         |                                                                                                               |   |    |    |    |    |    |    |       |              |                        |                                                   |                                                                                                                        |
| <a href="#">DEHA0G12815g</a>                      | highly similar to CA5581/CaRAD3 Candida albicans CaRAD3, start by similarity                                           |                                                                                                               |   |    |    |    |    |    |    |       |              |                        |                                                   |                                                                                                                        |
| <a href="#">KLLA0C17776g</a>                      | highly similar to splP06839 Saccharomyces cerevisiae YER171w RAD3 DNA helicase/ATPase, start by similarity             |                                                                                                               |   |    |    |    |    |    |    |       |              |                        |                                                   |                                                                                                                        |
| <a href="#">CAGL0L08844g</a>                      | similar to splP22516 Saccharomyces cerevisiae YPL008w CHL1 protein of the DEAH box family, start by similarity         |                                                                                                               |   |    |    |    |    |    |    |       |              |                        |                                                   |                                                                                                                        |
| <a href="#">KLLA0F27181g</a>                      | similar to splP22516 Saccharomyces cerevisiae YPL008w CHL1 protein of the DEAH box family, start by similarity         |                                                                                                               |   |    |    |    |    |    |    |       |              |                        |                                                   |                                                                                                                        |
| <a href="#">YALI0A13519g</a>                      | similar to splP35207 Saccharomyces cerevisiae YLR398c SKI2 antiviral protein and putative helicase, hypothetical start |                                                                                                               |   |    |    |    |    |    |    |       |              |                        |                                                   |                                                                                                                        |
| <a href="#">CAGL0C02563g</a>                      | similar to splP35207 Saccharomyces cerevisiae YLR398c SKI2, hypothetical start                                         |                                                                                                               |   |    |    |    |    |    |    |       |              |                        |                                                   |                                                                                                                        |

|                                |                        |                                                                                        |           |    |    |    |    |    |    |       |           |                              |                                                                                                                                                                                                     |
|--------------------------------|------------------------|----------------------------------------------------------------------------------------|-----------|----|----|----|----|----|----|-------|-----------|------------------------------|-----------------------------------------------------------------------------------------------------------------------------------------------------------------------------------------------------|
|                                |                        |                                                                                        |           |    |    |    |    |    |    |       |           | <a href="#">DEHA0C14025g</a> | highly similar to splP47047 Saccharomyces cerevisiae YJL05 MTR4, start by similarity                                                                                                                |
|                                |                        |                                                                                        |           |    |    |    |    |    |    |       |           | <a href="#">YALI0E07689g</a> | similar to splP35207 Saccharomyces cerevisiae YLR398c SKI2 antiviral protein and putative helicase, frame                                                                                           |
|                                |                        |                                                                                        |           |    |    |    |    |    |    |       |           | <a href="#">YALI0F20724g</a> | similar to splP32639 Saccharomyces cerevisiae YER172c BRR2 RNA helicase-related protein, start by similarity                                                                                        |
|                                |                        |                                                                                        |           |    |    |    |    |    |    |       |           | <a href="#">CAGL0H07601g</a> | weakly similar to splP51979 Saccharomyces cerevisiae YGL25 HFM1, hypothetical start                                                                                                                 |
|                                |                        |                                                                                        |           |    |    |    |    |    |    |       |           | <a href="#">YALI0D12210g</a> | similar to splP47047 Saccharomyces cerevisiae ATP-dependent RNA helicase DOB1, start by similarity                                                                                                  |
|                                |                        |                                                                                        |           |    |    |    |    |    |    |       |           | <a href="#">KLLA0C17798g</a> | similar to splP32639 Saccharomyces cerevisiae YER172c BRR2 RNA helicase-related protein, start by similarity                                                                                        |
|                                |                        |                                                                                        |           |    |    |    |    |    |    |       |           | <a href="#">KLLA0B03190g</a> | similar to splP35207 Saccharomyces cerevisiae YLR398c SKI2 antiviral protein and putative helicase, hypothetical start                                                                              |
|                                |                        |                                                                                        |           |    |    |    |    |    |    |       |           | <a href="#">DEHA0G13761g</a> | similar to CA4411CaBRR2 Candida albicans CaBRR2, hypothetical start                                                                                                                                 |
|                                |                        |                                                                                        |           |    |    |    |    |    |    |       |           | <a href="#">YALI0A11869g</a> | similar to splP35207 Saccharomyces cerevisiae Antiviral protein SKI2, hypothetical start                                                                                                            |
| <a href="#">BRR2 (YER172C)</a> | <a href="#">3.6.1-</a> | splP32639 Saccharomyces cerevisiae YER172c BRR2 RNA helicase-related protein P5.1.f3.1 | inviabile | NA | NA | NA | NA | NA | NA | skcdy | 5 5 6 5 8 | <a href="#">YALI0E07645g</a> | similar to splP35207 Saccharomyces cerevisiae YLR398c SKI2 antiviral protein and putative helicase, frame                                                                                           |
|                                |                        |                                                                                        |           |    |    |    |    |    |    |       |           | <a href="#">YALI0E07700g</a> | similar to splP35207 Saccharomyces cerevisiae YLR398c SKI2 antiviral protein and putative helicase, frame                                                                                           |
|                                |                        |                                                                                        |           |    |    |    |    |    |    |       |           | <a href="#">KLLA0B03179g</a> | similar to splP35207 Saccharomyces cerevisiae YLR398c SKI2 antiviral protein and putative helicase, start by similarity                                                                             |
|                                |                        |                                                                                        |           |    |    |    |    |    |    |       |           | <a href="#">DEHA0A11715g</a> | similar to splP35207 Saccharomyces cerevisiae YLR398c SKI2 antiviral protein and putative helicase, hypothetical start                                                                              |
|                                |                        |                                                                                        |           |    |    |    |    |    |    |       |           | <a href="#">CAGL0G00506g</a> | highly similar to splP53327 Saccharomyces cerevisiae YGR271w start by similarity                                                                                                                    |
|                                |                        |                                                                                        |           |    |    |    |    |    |    |       |           | <a href="#">CAGL0L11946g</a> | similar to splP32639 Saccharomyces cerevisiae YER172c RNA helicase-related protein, start by similarity                                                                                             |
|                                |                        |                                                                                        |           |    |    |    |    |    |    |       |           | <a href="#">KLLA0A09889g</a> | highly similar to splP53327 Saccharomyces cerevisiae YGR271w start by similarity                                                                                                                    |
|                                |                        |                                                                                        |           |    |    |    |    |    |    |       |           | <a href="#">DEHA0G21681g</a> | highly similar to CA3403IPF866 Candida albicans IPF8650, start by similarity                                                                                                                        |
|                                |                        |                                                                                        |           |    |    |    |    |    |    |       |           | <a href="#">KLLA0D11462g</a> | similar to splP51979 Saccharomyces cerevisiae YGL251c HFM1 DNA/RNA helicase, start by similarity                                                                                                    |
|                                |                        |                                                                                        |           |    |    |    |    |    |    |       |           | <a href="#">KLLA0F01364g</a> | highly similar to splP47047 Saccharomyces cerevisiae YJL05 MTR4 involved in nucleocytoplasmic transport of mRNA, start by similarity                                                                |
|                                |                        |                                                                                        |           |    |    |    |    |    |    |       |           | <a href="#">CAGL0J04928g</a> | highly similar to splP47047 Saccharomyces cerevisiae YJL05 MTR4, start by similarity                                                                                                                |
|                                |                        |                                                                                        |           |    |    |    |    |    |    |       |           | <a href="#">YALI0B13904g</a> | similar to splP53327 Saccharomyces cerevisiae YGR271w strong similarity to S.pombe RNA helicase or splP32639 Saccharomyces cerevisiae YER172c BRR2 RNA helicase-related protein, hypothetical start |
|                                |                        |                                                                                        |           |    |    |    |    |    |    |       |           | <a href="#">DEHA0F08877g</a> | similar to caCA4212CaHFM1 Candida albicans CaHFM1 DNA/RNA helicase, start by similarity                                                                                                             |

|                                |                        |                                                                                                |   |     |     |     |     |     |       |           |                              |                                                                                                                        |                                                                                                                                      |
|--------------------------------|------------------------|------------------------------------------------------------------------------------------------|---|-----|-----|-----|-----|-----|-------|-----------|------------------------------|------------------------------------------------------------------------------------------------------------------------|--------------------------------------------------------------------------------------------------------------------------------------|
|                                |                        |                                                                                                |   |     |     |     |     |     |       |           | <a href="#">YALI0A13519g</a> | similar to splP35207 Saccharomyces cerevisiae YLR398c SKI2 antiviral protein and putative helicase, hypothetical start |                                                                                                                                      |
|                                |                        |                                                                                                |   |     |     |     |     |     |       |           | <a href="#">CAGL0C02563g</a> | similar to splP35207 Saccharomyces cerevisiae YLR398c SKI2, hypothetical start                                         |                                                                                                                                      |
|                                |                        |                                                                                                |   |     |     |     |     |     |       |           | <a href="#">DEHA0C14025g</a> | highly similar to splP47047 Saccharomyces cerevisiae YJL051MTR4, start by similarity                                   |                                                                                                                                      |
|                                |                        |                                                                                                |   |     |     |     |     |     |       |           | <a href="#">YAL10E07689g</a> | similar to splP35207 Saccharomyces cerevisiae YLR398c SKI2 antiviral protein and putative helicase, frame              |                                                                                                                                      |
|                                |                        |                                                                                                |   |     |     |     |     |     |       |           | <a href="#">YAL10F20724g</a> | similar to splP32639 Saccharomyces cerevisiae YER172c BRR2 RNA helicase-related protein, start by similarity           |                                                                                                                                      |
|                                |                        |                                                                                                |   |     |     |     |     |     |       |           | <a href="#">CAGL0H07601g</a> | weakly similar to splP51979 Saccharomyces cerevisiae YGL251HFM1, hypothetical start                                    |                                                                                                                                      |
|                                |                        |                                                                                                |   |     |     |     |     |     |       |           | <a href="#">YALI0D12210g</a> | similar to splP47047 Saccharomyces cerevisiae ATP-dependent RNA helicase DOB1, start by similarity                     |                                                                                                                                      |
|                                |                        |                                                                                                |   |     |     |     |     |     |       |           | <a href="#">KLLA0C17798g</a> | similar to splP32639 Saccharomyces cerevisiae YER172c BRR2 RNA helicase-related protein, start by similarity           |                                                                                                                                      |
|                                |                        |                                                                                                |   |     |     |     |     |     |       |           | <a href="#">KLLA0B03190g</a> | similar to splP35207 Saccharomyces cerevisiae YLR398c SKI2 antiviral protein and putative helicase, hypothetical start |                                                                                                                                      |
|                                |                        |                                                                                                |   |     |     |     |     |     |       |           | <a href="#">DEHA0G13761g</a> | similar to CA44111CaBRR2 Candida albicans CaBRR2, hypothetical start                                                   |                                                                                                                                      |
|                                |                        |                                                                                                |   |     |     |     |     |     |       |           | <a href="#">YALI0A11869g</a> | similar to splP35207 Saccharomyces cerevisiae Antiviral protein SKI2, hypothetical start                               |                                                                                                                                      |
|                                |                        |                                                                                                |   |     |     |     |     |     |       |           | <a href="#">YAL10E07645g</a> | similar to splP35207 Saccharomyces cerevisiae YLR398c SKI2 antiviral protein and putative helicase, frame              |                                                                                                                                      |
| <a href="#">SLHI (YGR271W)</a> | <a href="#">3.6.1-</a> | splP53327 Saccharomyces cerevisiae YGR271w strong similarity to S.pombe RNA helicase P5.1.f3.1 | - | 0.9 | Non | Non | Non | 0.6 | sekdy | 5 5 6 5 8 | <a href="#">GLC.40</a>       | <a href="#">YAL10E07700g</a>                                                                                           | similar to splP35207 Saccharomyces cerevisiae YLR398c SKI2 antiviral protein and putative helicase, frame                            |
|                                |                        |                                                                                                |   |     |     |     |     |     |       |           |                              | <a href="#">KLLA0B03179g</a>                                                                                           | similar to splP35207 Saccharomyces cerevisiae YLR398c SKI2 antiviral protein and putative helicase, start by similarity              |
|                                |                        |                                                                                                |   |     |     |     |     |     |       |           |                              | <a href="#">DEHA0A11715g</a>                                                                                           | similar to splP35207 Saccharomyces cerevisiae YLR398c SKI2 antiviral protein and putative helicase, hypothetical start               |
|                                |                        |                                                                                                |   |     |     |     |     |     |       |           |                              | <a href="#">CAGL0G00506g</a>                                                                                           | highly similar to splP53327 Saccharomyces cerevisiae YGR271w, start by similarity                                                    |
|                                |                        |                                                                                                |   |     |     |     |     |     |       |           |                              | <a href="#">CAGL0L11946g</a>                                                                                           | similar to splP32639 Saccharomyces cerevisiae YER172c RNA helicase-related protein, start by similarity                              |
|                                |                        |                                                                                                |   |     |     |     |     |     |       |           |                              | <a href="#">KLLA0A09889g</a>                                                                                           | highly similar to splP53327 Saccharomyces cerevisiae YGR271w, start by similarity                                                    |
|                                |                        |                                                                                                |   |     |     |     |     |     |       |           |                              | <a href="#">DEHA0G21681g</a>                                                                                           | highly similar to CA34031IPF86: Candida albicans IPF8650, start by similarity                                                        |
|                                |                        |                                                                                                |   |     |     |     |     |     |       |           |                              | <a href="#">KLLA0D11462g</a>                                                                                           | similar to splP51979 Saccharomyces cerevisiae YGL251c HFM1 DNA/RNA helicase, start by similarity                                     |
|                                |                        |                                                                                                |   |     |     |     |     |     |       |           |                              | <a href="#">KLLA0F01364g</a>                                                                                           | highly similar to splP47047 Saccharomyces cerevisiae YJL051MTR4 involved in nucleocytoplasmic transport of mRNA, start by similarity |
|                                |                        |                                                                                                |   |     |     |     |     |     |       |           |                              | <a href="#">CAGL0J04928g</a>                                                                                           | highly similar to splP47047 Saccharomyces cerevisiae YJL051MTR4, start by similarity                                                 |
|                                |                        |                                                                                                |   |     |     |     |     |     |       |           |                              |                                                                                                                        | similar to splP53327 Saccharomyces cerevisiae YGR271w strong similarity                                                              |



|                                    |                        |                                                                                                                        |        |     |     |     |     |     |     |       |              |                              |                                                                                                                           |                                                                                                                                                                                                                            |
|------------------------------------|------------------------|------------------------------------------------------------------------------------------------------------------------|--------|-----|-----|-----|-----|-----|-----|-------|--------------|------------------------------|---------------------------------------------------------------------------------------------------------------------------|----------------------------------------------------------------------------------------------------------------------------------------------------------------------------------------------------------------------------|
|                                    |                        |                                                                                                                        |        |     |     |     |     |     |     |       |              | <a href="#">YALI0B13904g</a> | S.pombe RNA helicase or spIP32<br>Saccharomyces cerevisiae YER17<br>BRR2 RNA helicase-related prote<br>hypothetical start |                                                                                                                                                                                                                            |
|                                    |                        |                                                                                                                        |        |     |     |     |     |     |     |       |              | <a href="#">DEHA0F08877g</a> | similar to caCA4212CaHFM1 Car<br>albicans CaHFM1 DNA/RNA heli<br>by homology, start by similarity                         |                                                                                                                                                                                                                            |
| <a href="#">HPR5<br/>(YJL092W)</a> | <a href="#">3.6.1-</a> | spIP12954<br>Saccharomyces<br>cerevisiae YJL092w<br>HPR5 ATP-<br>dependent DNA<br>helicase P2.136.f2.1                 | viable | Ess | Ess | Ess | Ess | Ess | Ess | sckdy | 2 2 3 2<br>1 | <a href="#">GLR.3280</a>     | <a href="#">KLLA0C03674g</a>                                                                                              | similar to sgdlS0005455 Saccharom<br>cerevisiae YOL095c HMI1<br>mitochondrial DNA helicase, start<br>similarity                                                                                                            |
|                                    |                        |                                                                                                                        |        |     |     |     |     |     |     |       |              |                              | <a href="#">DEHA0B14509g</a>                                                                                              | weakly similar to spIP12954<br>Saccharomyces cerevisiae YJL09<br>HPR5 ATP-dependent DNA heli<br>start by similarity                                                                                                        |
|                                    |                        |                                                                                                                        |        |     |     |     |     |     |     |       |              |                              | <a href="#">CAGL0L03454g</a>                                                                                              | similar to spIP12954 Saccharomy<br>cerevisiae YJL092w HPR5 ATP-<br>dependent DNA helicase, hypothet<br>start                                                                                                               |
|                                    |                        |                                                                                                                        |        |     |     |     |     |     |     |       |              |                              | <a href="#">KLLA0F14234g</a>                                                                                              | weakly similar to spIP12954<br>Saccharomyces cerevisiae YJL09<br>HPR5 ATP-dependent DNA heli<br>hypothetical start                                                                                                         |
|                                    |                        |                                                                                                                        |        |     |     |     |     |     |     |       |              |                              | <a href="#">KLLA0F14256g</a>                                                                                              | weakly similar to spIP12954<br>Saccharomyces cerevisiae YJL09<br>HPR5 ATP-dependent DNA heli<br>start by similarity                                                                                                        |
|                                    |                        |                                                                                                                        |        |     |     |     |     |     |     |       |              |                              | <a href="#">CAGL0I07623g</a>                                                                                              | similar to trlQ12039 Saccharomy<br>cerevisiae YOL095c HMI1, hypoth<br>start                                                                                                                                                |
|                                    |                        |                                                                                                                        |        |     |     |     |     |     |     |       |              |                              | <a href="#">DEHA0A13948g</a>                                                                                              | weakly similar to trlQ12039<br>Saccharomyces cerevisiae YOL09<br>HMI1 mitochondrial DNA helica<br>hypothetical start                                                                                                       |
|                                    |                        |                                                                                                                        |        |     |     |     |     |     |     |       |              |                              | <a href="#">YALIOE27269g</a>                                                                                              | weakly similar to spIP12954<br>Saccharomyces cerevisiae YJL09<br>HPR5 ATP-dependent DNA heli<br>hypothetical start                                                                                                         |
| <a href="#">DDP1<br/>(YOR163W)</a> | <a href="#">3.6.1-</a> | spIQ99321<br>Saccharomyces<br>cerevisiae YOR163w<br>DDP1 diadenosine<br>hexaphosphate<br>(Ap6A) hydrolase<br>singleton | viable | NA  | NA  | NA  | NA  | NA  | NA  | sckdy | 1 1 1 1<br>1 | <a href="#">GLR.894</a>      | <a href="#">DEHA0F15389g</a>                                                                                              | similar to spIQ99321 Saccharomy<br>cerevisiae YOR163w DDP1 diaden<br>hexaphosphate (Ap6A) hydrolas<br>hypothetical start                                                                                                   |
|                                    |                        |                                                                                                                        |        |     |     |     |     |     |     |       |              |                              | <a href="#">YALIOA04675g</a>                                                                                              | similar to spIQ99321 Saccharomy<br>cerevisiae Diadenosine and<br>diphosphoinositol polyphosphat<br>phosphohydrolase 1 (EC 3.6.1.-<br>(Diadenosine 5, 5 -P1, P6-hexaphos<br>hydrolase) (AP6A hydrolase), star<br>similarity |
|                                    |                        |                                                                                                                        |        |     |     |     |     |     |     |       |              |                              | <a href="#">KLLA0F20273g</a>                                                                                              | similar to spIQ99321 Saccharomy<br>cerevisiae YOR163w DDP1 diaden<br>hexaphosphate (Ap6A) hydrolas<br>singleton, start by similarity                                                                                       |
|                                    |                        |                                                                                                                        |        |     |     |     |     |     |     |       |              |                              | <a href="#">CAGL0L04422g</a>                                                                                              | similar to spIQ99321 Saccharomy<br>cerevisiae YOR163w DDP1,<br>hypothetical start                                                                                                                                          |

[Giaever G. et al. \(2002\) Functional profiling of the Saccharomyces cerevisiae genome. Nature 418\(6896\):387-91](#)

[Dunn B. et al. \(2004\) Genetic footprinting: A functional analysis of the S. cerevisiae genome](#)

'Ess' indicates that the gene is essential for growth under the condition tested.

'Non' indicates that the gene is not essential.

A number indicates that the gene when mutated exhibits an intermediate phenotype; the number is the relative growth score.

'ND' indicates that no data are available.

'NA' indicates that no gene deletion experiments are available.

N.B. : conservation percentage color code 0% 1% to 20% 21% to 40% 41% to 60% 61% to 80% 81% to 90% 91% to 99% 100%

[Center for Bioinformatics - Bordeaux](#)  
[mail.Webmaster@cbi.labri.fr](mailto:mail.Webmaster@cbi.labri.fr)

URL: <http://cbi.labri.fr/Genolevures/path/pathway-00500.html>  
Update: Thursday, 30 September 2004
