# Supplementary material
Source: PubMed Central journal article supplement (PMC1347522)
Supplement: nar_34_suppl-1_D432__4.pdf [file nar_34_suppl-1_D432__4.pdf]

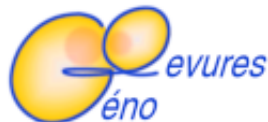

About  
[Help!](#)

Search

Families  
Blast

Download  
Publications

Top  
CBiB

## Search results

Génolevures found 31 elements for “+(glucan homocitrate) +synthase” using a keyword search:

- [26](#) Genes or other elements that have or may have a translation product
- [76](#) Genes as above, including orthologs (to *S. cerevisiae* genes) predicted using Génolevures protein families
- 0 RNA genes or other elements that have or may have a transcription product only
- 0 Cis-active elements having neither translation nor transcription products
- [5](#) Protein families

### Genes for “+(glucan homocitrate) +synthase”

1. [CAGL0I10054g: similar to splP33336 Saccharomyces cerevisiae YGR143w SKN1 glucan synthase or splP32486 Saccharomyces cerevisiae YPR159w KRE6, start by similarity](#) · score=1.00
2. [CAGL0K04037g: trlQ9P8N8 Candida glabrata 1, 3-beta-glucan synthase, identified start](#) · score=1.00
3. [DEHA0A07436g: similar to splQ04952 Saccharomyces cerevisiae YMR306w FKS3 1,3-beta-glucan synthase, start by similarity](#) · score=1.00
4. [DEHA0B14080g: similar to splP32486 Saccharomyces cerevisiae YPR159w KRE6 glucan synthase subunit, start by similarity](#) · score=1.00
5. [DEHA0B14201g: similar to CA5661|CaKRE6 Candida albicans CaKRE6 Glucan synthase subunit, hypothetical start](#) · score=1.00
6. [DEHA0B14223g: similar to CA5661|CaKRE6 Candida albicans CaKRE6 Glucan synthase subunit, hypothetical start](#) · score=1.00
7. [DEHA0C02112g: highly similar to trlO13428 Candida albicans Beta-1, 3-glucan synthase catalytic subunit 1, start by similarity](#) · score=1.00
8. [DEHA0F09405g: highly similar to calCA2335|CaLYS21 Candida albicans CaLYS21 homocitrate synthase \(by homology\), start by similarity](#) · score=1.00
9. [KLLA0B05841g: highly similar to splP40989 Saccharomyces cerevisiae GR032w GSC2 1, 3-beta-D-glucan synthase subunit, start by similarity](#) · score=1.00
10. [KLLA0C08888g: similar to splO13423 Candida albicans Glucan synthase, start by similarity](#) · score=1.00
11. [KLLA0E03597g: similar to splP32486 Saccharomyces cerevisiae YPR159w KRE6 glucan synthase subunit, start by similarity](#) · score=1.00
12. [KLLA0E23782g: highly similar to splQ12122 Saccharomyces cerevisiae YDL131w LYS21 homocitrate synthase, start by similarity](#) · score=1.00
13. [KLLA0F05489g: highly similar to splQ12122 Saccharomyces cerevisiae YDL131w LYS21 homocitrate synthase, start by similarity](#) · score=1.00
14. [YALI0B20570g: weakly similar to splP38678 Neurospora crassa Glucan synthase-1 \(EC 2.4.1.34\), start by similarity](#) · score=1.00
15. [YALI0C01639g: pseudogene, similar to splQ06472 Saccharomyces cerevisiae Beta-glucan](#)

- [synthesis-associated protein \(Killer toxin-resistance protein 6\) and splP33336 Saccharomyces cerevisiae YGR143w SKN1 glucan synthase subunit, frameshift](#) · score=1.00
16. [YALI0C14190g: similar to splP33336 Saccharomyces cerevisiae YGR143w SKN1 glucan synthase subunit P2.4.f2.1 and splP32486 Saccharomyces cerevisiae YPR159w KRE6 glucan synthase subunit P2.4.f2.1 associated protein, hypothetical start](#) · score=1.00
  17. [YALI0E21021g: trlQ9UVK9 Yarrowia lipolytica 1,3-beta-glucan synthase activity, identified start](#) · score=1.00
  18. [YALIOF31075g: splQ12726 Yarrowia lipolytica Homocitrate synthase, identified start](#) · score=1.00
  19. [YCR034w: FEN1, Fatty acid elongase, involved in sphingolipid biosynthesis; acts on fatty acids of up to 24 carbons in length; mutations have regulatory effects on 1,3-beta-glucan synthase, vacuolar ATPase, and the secretory pathway](#) · score=1.00
  20. [YDL131w: LYS21, Homocitrate synthase isozyme, catalyzes the condensation of acetyl-CoA and alpha-ketoglutarate to form homocitrate, which is the first step in the lysine biosynthesis pathway; highly similar to the other isozyme, Lys20p](#) · score=1.00
  21. [YDL182w: LYS20, Homocitrate synthase isozyme, catalyzes the condensation of acetyl-CoA and alpha-ketoglutarate to form homocitrate, which is the first step in the lysine biosynthesis pathway; highly similar to the other isozyme, Lys21p](#) · score=1.00
  22. [YGR032w: GSC2, Catalytic subunit of 1,3-beta-glucan synthase, has similarity to an alternate catalytic subunit, Fks1p \(Gsc1p\); Rho1p encodes the regulatory subunit; involved in cell wall synthesis and maintenance](#) · score=1.00
  23. [YLR342w: FKS1, Catalytic subunit of 1,3-beta-D-glucan synthase, functionally redundant with alternate catalytic subunit Gsc2p; binds to regulatory subunit Rho1p; involved in cell wall synthesis and maintenance; localizes to sites of cell wall remodeling](#) · score=1.00
  24. [YMR306w: FKS3, Protein of unknown function, has similarity to 1,3-beta-D-glucan synthase catalytic subunits Fks1p and Gsc2p](#) · score=1.00
  25. [YPR159w: KRE6, Protein required for beta-1,6 glucan biosynthesis; putative beta-glucan synthase; appears functionally redundant with Skn1p](#) · score=1.00
  26. [YPR165w: RHO1, GTP-binding protein of the rho subfamily of Ras-like proteins, involved in establishment of cell polarity; regulates protein kinase C \(Pkc1p\) and the cell wall synthesizing enzyme 1,3-beta-glucan synthase \(Fks1p and Gsc2p\)](#) · score=1.00

### Genes for “+(glucan homocitrate) +synthase”, including orthologs to *S. cerevisiae* genes for “+(glucan homocitrate) +synthase”

1. [CAGL0F05269g: highly similar to splP19073 Saccharomyces cerevisiae YLR229c CDC42, start by similarity](#) · score=1
2. [CAGL0G01034g: highly similar to splP40989 Saccharomyces cerevisiae YGR032w GSC2 or splP38631 Saccharomyces cerevisiae YLR342w FKS1, start by similarity](#) · score=1
3. [CAGL0G04851g: highly similar to splP40319 Saccharomyces cerevisiae YLR372w SUR4 sterol isomerase, fatty acid elongase, hypothetical start](#) · score=1
4. [CAGL0G05764g: similar to splP53879 Saccharomyces cerevisiae YNL180c RHO5, start by similarity](#) · score=1
5. [CAGL0G08558g: highly similar to splQ00245 Saccharomyces cerevisiae YIL118w RHO3, start by similarity](#) · score=1
6. [CAGL0I08459g: highly similar to splP06780 Saccharomyces cerevisiae YPR165w RHO1, start by similarity](#) · score=1
7. [CAGL0I10054g: similar to splP33336 Saccharomyces cerevisiae YGR143w SKN1 glucan synthase or splP32486 Saccharomyces cerevisiae YPR159w KRE6, start by similarity](#) · score=1
8. [CAGL0J05632g: highly similar to splP06781 Saccharomyces cerevisiae YNL090w RHO2, start by similarity](#) · score=1

9. [CAGL0J06402g: highly similar to splQ12122 Saccharomyces cerevisiae YDL131w LYS21 or splP48570 Saccharomyces cerevisiae YDL182w LYS20, hypothetical start · score=1](#)
10. [CAGL0J09240g: highly similar to splQ12122 Saccharomyces cerevisiae YDL131w LYS21 or splP48570 Saccharomyces cerevisiae YDL182w LYS20, start by similarity · score=1](#)
11. [CAGL0J11242g: similar to splP53879 Saccharomyces cerevisiae YNL180c RHO5, start by similarity · score=1](#)
12. [CAGL0K00583g: highly similar to splP25358 Saccharomyces cerevisiae YCR034w V-SNARE bypass mutant, hypothetical start · score=1](#)
13. [CAGL0K04037g: trlQ9P8N8 Candida glabrata 1, 3-beta-glucan synthase, identified start · score=1](#)
14. [CAGL0K08316g: some similarities with splQ00246 Saccharomyces cerevisiae YKR055w RHO4 GTP-binding protein, hypothetical start · score=1](#)
15. [CAGL0L08184g: highly similar to splP25358 Saccharomyces cerevisiae YCR034w GNS1, start by similarity · score=1](#)
16. [CAGL0M13827g: similar to splQ04952 Saccharomyces cerevisiae YMR306w FKS3, hypothetical start · score=1](#)
17. [DEHA0A07436g: similar to splQ04952 Saccharomyces cerevisiae YMR306w FKS3 1,3-beta-glucan synthase, start by similarity · score=1](#)
18. [DEHA0B11792g: highly similar to splP06780 Saccharomyces cerevisiae YPR165w RHO1 GTP-binding protein of the rho subfamily of ras-like proteins, start by similarity · score=1](#)
19. [DEHA0B14080g: similar to splP32486 Saccharomyces cerevisiae YPR159w KRE6 glucan synthase subunit, start by similarity · score=1](#)
20. [DEHA0B14102g: similar to splP87023 Candida albicans Beta-glucan synthesis-associated protein KRE6, hypothetical start · score=1](#)
21. [DEHA0B14201g: similar to CA5661|CaKRE6 Candida albicans CaKRE6 Glucan synthase subunit, hypothetical start · score=1](#)
22. [DEHA0B14223g: similar to CA5661|CaKRE6 Candida albicans CaKRE6 Glucan synthase subunit, hypothetical start · score=1](#)
23. [DEHA0C02112g: highly similar to trlO13428 Candida albicans Beta-1, 3-glucan synthase catalytic subunit 1, start by similarity · score=1](#)
24. [DEHA0C07293g: similar to splQ00245 Saccharomyces cerevisiae YIL118w RHO3, hypothetical start · score=1](#)
25. [DEHA0C09031g: similar to splP06781 Saccharomyces cerevisiae YNL090w RHO2, start by similarity · score=1](#)
26. [DEHA0D14498g: highly similar to CA0261|CaLYS22 Candida albicans CaLYS22, start by similarity · score=1](#)
27. [DEHA0D16555g: similar to CA2933|IPF11512 Candida albicans IPF11512, hypothetical start · score=1](#)
28. [DEHA0F04004g: highly similar to CA3005|CaCC43 Candida albicans CaCC43 Cell Division Control-like \(by homology\), start by similarity · score=1](#)
29. [DEHA0F09405g: highly similar to calCA2335|CaLYS21 Candida albicans CaLYS21 homocitrate synthase \(by homology\), start by similarity · score=1](#)
30. [DEHA0G06116g: similar to splP40319 Saccharomyces cerevisiae Elongation of fatty acids protein 3 \(SUR4 protein\) \(SRE1 protein\) \(V-SNARE bypass mutant gene 1 protein\), hypothetical start · score=1](#)
31. [DEHA0G10912g: highly similar to CA3497|CaFEN11 Candida albicans CaFEN11 Fatty acid elongase required for sphingolipid formation \(by homology\), hypothetical start · score=1](#)
32. [DEHA0G14751g: weakly similar to CA6143|IPF1873 Candida albicans IPF1873, start by similarity · score=1](#)
33. [DEHA0G15037g: highly similar to CA3879|CaCDC42 Candida albicans CaCDC42 Cell Division Control, start by similarity · score=1](#)
34. [KLLA0A04213g: highly similar to splP19073 Saccharomyces cerevisiae YLR229c CDC42 GTP-](#)

- [binding protein of RAS superfamily, start by similarity](#) · score=1
35. [KLLA0A05643g: similar to splQ00246 Saccharomyces cerevisiae YKR055w RHO4 GTP-binding protein of the rho family, hypothetical start](#) · score=1
  36. [KLLA0B05841g: highly similar to splP40989 Saccharomyces cerevisiae GR032w GSC2 1, 3-beta-D-glucan synthase subunit, start by similarity](#) · score=1
  37. [KLLA0B07777g: similar to splP40319 Saccharomyces cerevisiae YLR372w SUR4 sterol isomerase, fatty acid elongase, start by similarity](#) · score=1
  38. [KLLA0B10626g: gil22858698lgbIAAN05733.1 Kluyveromyces lactis RHO1, start by similarity](#) · score=1
  39. [KLLA0C03542g: similar to splP25358 Saccharomyces cerevisiae YCR034w GNS1 fatty acid elongase required for sphingolipid formation, start by similarity](#) · score=1
  40. [KLLA0C08888g: similar to splO13423 Candida albicans Glucan synthase, start by similarity](#) · score=1
  41. [KLLA0C13816g: highly similar to splP06781 Saccharomyces cerevisiae YNL090w RHO2 GTP-binding protein of the RHO subfamily of RAS-like proteins, start by similarity](#) · score=1
  42. [KLLA0C14069g: similar to splQ04952 Saccharomyces cerevisiae YMR306w FKS3, start by similarity](#) · score=1
  43. [KLLA0D08327g: similar to splP53879 Saccharomyces cerevisiae YNL180c RHO5, start by similarity](#) · score=1
  44. [KLLA0E03597g: similar to splP32486 Saccharomyces cerevisiae YPR159w KRE6 glucan synthase subunit, start by similarity](#) · score=1
  45. [KLLA0E23782g: highly similar to splQ12122 Saccharomyces cerevisiae YDL131w LYS21 homocitrate synthase, start by similarity](#) · score=1
  46. [KLLA0F03443g: highly similar to splQ9HF51 Ashbya gossypii Rho3, start by similarity](#) · score=1
  47. [KLLA0F05489g: highly similar to splQ12122 Saccharomyces cerevisiae YDL131w LYS21 homocitrate synthase, start by similarity](#) · score=1
  48. [YALI0B13662g: similar to trlQ96WY0 Emericella nidulans Rho3 GTPase, hypothetical start](#) · score=1
  49. [YALI0B15752g: trlQ9P8U2 Yarrowia lipolytica CDC42 GTP-binding protein of RAS superfamily, identified start](#) · score=1
  50. [YALI0B20196g: similar to splP25358 Saccharomyces cerevisiae YCR034w GNS1 fatty acid elongase required for sphingolipid formation, hypothetical start](#) · score=1
  51. [YALI0C01411g: similar to trlQ9UVK9 Yarrowia lipolytica Fks1p, hypothetical start](#) · score=1
  52. [YALI0C01639g: pseudogene, similar to splQ06472 Saccharomyces cerevisiae Beta-glucan synthesis-associated protein \(Killer toxin-resistance protein 6\) and splP33336 Saccharomyces cerevisiae YGR143w SKN1 glucan synthase subunit, frameshift](#) · score=1
  53. [YALI0C13530g: similar to splP06781 Saccharomyces cerevisiae YNL090w RHO2 GTP-binding protein of the RHO subfamily of RAS-like proteins, hypothetical start](#) · score=1
  54. [YALI0C14190g: similar to splP33336 Saccharomyces cerevisiae YGR143w SKN1 glucan synthase subunit P2.4.f2.1 and splP32486 Saccharomyces cerevisiae YPR159w KRE6 glucan synthase subunit P2.4.f2.1 associated protein, hypothetical start](#) · score=1
  55. [YALI0D01045g: trlQ9HGU7 Yarrowia lipolytica GTP-binding protein Rho1, GTP-binding protein of the rho subfamily of ras-like proteins, identified start](#) · score=1
  56. [YALI0E21021g: trlQ9UVK9 Yarrowia lipolytica 1,3-beta-glucan synthase activity, identified start](#) · score=1
  57. [YALI0E23001g: trlQ9HGU7 Yarrowia lipolytica GTP-binding protein, identified start](#) · score=1
  58. [YALI0F06754g: similar to calCA6061IPF8302 Candida albicans hypothetical start](#) · score=1
  59. [YALI0F17270g: similar to splQ00245 Saccharomyces cerevisiae YIL118w RHO3 GTP-binding protein of the rho family, hypothetical start](#) · score=1
  60. [YALI0F31075g: splQ12726 Yarrowia lipolytica Homocitrate synthase, identified start](#) · score=1
  61. [YCR034w: FEN1, Fatty acid elongase, involved in sphingolipid biosynthesis; acts on fatty acids of](#)

- [up to 24 carbons in length; mutations have regulatory effects on 1,3-beta-glucan synthase, vacuolar ATPase, and the secretory pathway](#) · score=1.00
62. [YDL131w: LYS21, Homocitrate synthase isozyme, catalyzes the condensation of acetyl-CoA and alpha-ketoglutarate to form homocitrate, which is the first step in the lysine biosynthesis pathway; highly similar to the other isozyme, Lys20p](#) · score=1.00
63. [YDL182w: LYS20, Homocitrate synthase isozyme, catalyzes the condensation of acetyl-CoA and alpha-ketoglutarate to form homocitrate, which is the first step in the lysine biosynthesis pathway; highly similar to the other isozyme, Lys21p](#) · score=1.00
64. [YGR032w: GSC2, Catalytic subunit of 1,3-beta-glucan synthase, has similarity to an alternate catalytic subunit, Fks1p \(Gsc1p\); Rho1p encodes the regulatory subunit; involved in cell wall synthesis and maintenance](#) · score=1.00
65. [YGR143w: SKN1, Protein involved in sphingolipid biosynthesis; type II membrane protein with similarity to Kre6p](#) · score=1
66. [YIL118w: RHO3, Non-essential small GTPase of the Rho/Rac subfamily of Ras-like proteins involved in the establishment of cell polarity; GTPase activity positively regulated by the GTPase activating protein \(GAP\) Rgd1p](#) · score=1
67. [YJL196c: ELO1, Elongase I, medium-chain acyl elongase, catalyzes carboxy-terminal elongation of unsaturated C12-C16 fatty acyl-CoAs to C16-C18 fatty acids](#) · score=1
68. [YKR055w: RHO4, Non-essential small GTPase of the Rho/Rac subfamily of Ras-like proteins, likely to be involved in the establishment of cell polarity](#) · score=1
69. [YLR229c: CDC42, Small rho-like GTPase, essential for establishment and maintenance of cell polarity; mutants have defects in the organization of actin and septins](#) · score=1
70. [YLR342w: FKS1, Catalytic subunit of 1,3-beta-D-glucan synthase, functionally redundant with alternate catalytic subunit Gsc2p; binds to regulatory subunit Rho1p; involved in cell wall synthesis and maintenance; localizes to sites of cell wall remodeling](#) · score=1.00
71. [YLR372w: SUR4, Elongase, involved in fatty acid and sphingolipid biosynthesis; synthesizes very long chain 20-26-carbon fatty acids from C18-CoA primers; involved in regulation of sphingolipid biosynthesis](#) · score=1
72. [YMR306w: FKS3, Protein of unknown function, has similarity to 1,3-beta-D-glucan synthase catalytic subunits Fks1p and Gsc2p](#) · score=1.00
73. [YNL090w: RHO2, Non-essential small GTPase of the Rho/Rac subfamily of Ras-like proteins, involved in the establishment of cell polarity and in microtubule assembly](#) · score=1
74. [YNL180c: RHO5, Non-essential small GTPase of the Rho/Rac subfamily of Ras-like proteins, likely involved in protein kinase C \(Pkc1p\)-dependent signal transduction pathway that controls cell integrity](#) · score=1
75. [YPR159w: KRE6, Protein required for beta-1,6 glucan biosynthesis; putative beta-glucan synthase; appears functionally redundant with Skn1p](#) · score=1.00
76. [YPR165w: RHO1, GTP-binding protein of the rho subfamily of Ras-like proteins, involved in establishment of cell polarity; regulates protein kinase C \(Pkc1p\) and the cell wall synthesizing enzyme 1,3-beta-glucan synthase \(Fks1p and Gsc2p\)](#) · score=1.00

### RNA genes for “+(glucan homocitrate) +synthase”

none found

### Cis-active elements for “+(glucan homocitrate) +synthase”

none found

### Protein families for “+(glucan homocitrate) +synthase”

1. [GLC.36: 32-member family, sckdy \(6 7 6 7 6\)](#)
2. [GLR.15: 13-member family, sckdy \(2 1 1 6 3\)](#)
3. [GLR.23: 13-member family, sckdy \(3 3 3 2 2\)](#)
4. [GLR.3247: 13-member family, sckdy \(3 3 2 3 2\)](#)
5. [GLR.48: 9-member family, sckdy \(2 2 2 2 1\)](#)

---

[Center for Bioinformatics · Bordeaux](#)  
[mail Webmaster@cbi.labri.fr](mailto:Webmaster@cbi.labri.fr)

URL: <http://cbi.labri.fr/Genolevures/concordance>  
Update: Monday, 1 August 2005
