# Supplementary material
Source: PubMed Central journal article supplement (PMC1347522)
Supplement: nar_34_suppl-1_D432__5.pdf [file nar_34_suppl-1_D432__5.pdf]

## YETI

### Yeast Transport Information

Orf: **YGL167c**

Genes: PMR1, PMR1

Classification:

- P16.2.f7.1
  - 3.A. The P-P-bond-hydrolysis-driven Transporters
    - 3.A.3 The P-type ATPase (P-ATPase) Superfamily
      - 3.A.3.2 The Ca<sup>++</sup>-ATPase (CaA) Subfamily
        - **3.A.3.2.3 The Golgi Ca<sup>++</sup>/Mn<sup>++</sup>-ATPase**
          - Ca<sup>++</sup>/Mn<sup>++</sup>

Classification fields ( if existing):

- family
    - subclass
      - superfamily
        - subfamily
          - **cluster**
- putative substrate
